# Supplementary material for: Insights Into the Regulation of the Expression Pattern of Calvin-Benson-Bassham Cycle Enzymes in C3 and C4 Grasses
Source: Front Plant Sci. 2020 Oct 16;11:570436. doi: 10.3389/fpls.2020.570436 (PMC7595957; doi:10.3389/fpls.2020.570436)
Supplement: Supplementary file 7 [file Table_1.XLSX]

## Sheet: GDC_common
	X..motif_id	motif_alt_id	sequence_name	start	stop	strand	score	p.value	q.value	matched_sequence
1	ABI3VP1_tnt.VRN1_col_a_m1	VRN1	Rice	4601	4629	-	20.209	3.15e-09	3.21e-05	TTATTATTATTTTAGTTTTTTTTTTTATT
2	ABI3VP1_tnt.VRN1_col_a_m1	VRN1	Rice	4600	4628	-	17.9851	7.25e-09	3.83e-05	TATTATTATTTTAGTTTTTTTTTTTATTT
3	C2C2dof_tnt.At4g38000_col_a_m1	At4g38000	Rice	2462	2489	+	21.7727	1.15e-08	0.000183	GCTTCCTTTTTTCTTTTCTTTCTTTTTT
4	C2C2dof_tnt.OBP3_col_a_m1	OBP3	Rice	2470	2490	+	20.6061	1.81e-08	0.000574	TTTTCTTTTCTTTCTTTTTTA
5	C2C2dof_tnt.AT1G69570_col_a_m1	AT1G69570	Rice	2468	2494	+	20.8333	2.98e-08	0.000865	TTTTTTCTTTTCTTTCTTTTTTACATT
6	C2C2dof_tnt.AT5G66940_col_a_m1	AT5G66940	Rice	2467	2495	+	20.4242	3.23e-08	0.000883	CTTTTTTCTTTTCTTTCTTTTTTACATTC
7	ABI3VP1_tnt.VRN1_col_a_m1	VRN1	Rice	2462	2490	+	12.5075	4.75e-08	0.000165	GCTTCCTTTTTTCTTTTCTTTCTTTTTTA
8	ABI3VP1_tnt.VRN1_col_a_m1	VRN1	Rice	2463	2491	+	11.7612	6.04e-08	0.000188	CTTCCTTTTTTCTTTTCTTTCTTTTTTAC
9	ABI3VP1_tnt.VRN1_col_a_m1	VRN1	Rice	4118	4146	-	10.9104	7.9e-08	0.000234	CCAATTTTTTTTTCATTGTTTTTTTTTTC
10	C2C2dof_tnt.AT1G69570_colamp_a_m1	AT1G69570	Rice	2465	2485	-	18.697	8.01e-08	0.00522	AAGAAAGAAAAGAAAAAAGGA
11	C2C2dof_tnt.AT1G69570_col_a_m1	AT1G69570	Rice	2461	2487	+	19.0909	1.5e-07	0.00239	GGCTTCCTTTTTTCTTTTCTTTCTTTT
12	C2C2dof_tnt.At4g38000_col_a_m1	At4g38000	Rice	2463	2490	+	18.9697	1.66e-07	0.00081	CTTCCTTTTTTCTTTTCTTTCTTTTTTA
13	ABI3VP1_tnt.VRN1_col_a_m1	VRN1	Rice	2467	2495	+	8.34328	1.73e-07	0.000399	CTTTTTTCTTTTCTTTCTTTTTTACATTC
14	ABI3VP1_tnt.VRN1_col_a_m1	VRN1	Rice	4597	4625	-	8.13433	1.84e-07	0.000408	TATTATTTTAGTTTTTTTTTTTATTTACA
15	ABI3VP1_tnt.VRN1_col_a_m1	VRN1	Rice	4117	4145	-	8.01493	1.91e-07	0.000408	CAATTTTTTTTTCATTGTTTTTTTTTTCC
16	ABI3VP1_tnt.VRN1_col_a_m1	VRN1	Rice	4599	4627	-	7.91045	1.97e-07	0.000408	ATTATTATTTTAGTTTTTTTTTTTATTTA
17	C2C2dof_tnt.OBP3_colamp_a_m1	OBP3	Rice	2471	2489	+	16.8636	2.03e-07	0.00438	TTTCTTTTCTTTCTTTTTT
18	C2C2dof_tnt.OBP3_col_a_m1	OBP3	Rice	2463	2483	+	18.303	2.19e-07	0.00199	CTTCCTTTTTTCTTTTCTTTC
19	REM_tnt.REM19_colamp_a_m1	REM19	Rice	4600	4620	+	19.0597	2.24e-07	0.00131	AAATAAAAAAAAAAACTAAAA
20	BBRBPC_tnt.BPC1_col_a_m1	BPC1	Rice	2027	2050	-	14.7273	2.47e-07	0.0013	GAGAGGGGGAAAATGAGAGGGGGT
21	ABI3VP1_tnt.VRN1_col_a_m1	VRN1	Rice	4119	4147	-	7.02985	2.54e-07	0.000493	GCCAATTTTTTTTTCATTGTTTTTTTTTT
22	ABI3VP1_tnt.VRN1_col_a_m1	VRN1	Rice	4602	4630	-	6.56716	2.91e-07	0.000533	GTTATTATTATTTTAGTTTTTTTTTTTAT
23	C2C2dof_tnt.At4g38000_col_a_m1	At4g38000	Rice	2470	2497	+	18.2727	3.02e-07	0.00122	TTTTCTTTTCTTTCTTTTTTACATTCTA
24	C2C2dof_tnt.At4g38000_col_a_m1	At4g38000	Rice	4118	4145	-	18.2424	3.09e-07	0.00122	CAATTTTTTTTTCATTGTTTTTTTTTTC
25	C2C2dof_tnt.At4g38000_col_a_m1	At4g38000	Rice	4601	4628	-	17.9242	4.03e-07	0.00125	TATTATTATTTTAGTTTTTTTTTTTATT
26	C2C2dof_tnt.AT5G66940_col_a_m1	AT5G66940	Rice	2458	2486	+	17.7273	4.36e-07	0.00286	TGTGGCTTCCTTTTTTCTTTTCTTTCTTT
27	C2C2dof_tnt.AT5G66940_col_a_m1	AT5G66940	Rice	4603	4631	-	17.697	4.48e-07	0.00286	TGTTATTATTATTTTAGTTTTTTTTTTTA
28	C2C2dof_tnt.At4g38000_col_a_m1	At4g38000	Rice	4119	4146	-	17.7727	4.56e-07	0.00125	CCAATTTTTTTTTCATTGTTTTTTTTTT
29	REM_tnt.REM19_colamp_a_m1	REM19	Rice	4596	4616	+	17.6567	5.44e-07	0.00206	TTGTAAATAAAAAAAAAAACT
30	C2C2dof_tnt.At4g38000_col_a_m1	At4g38000	Rice	4603	4630	-	17.5152	5.61e-07	0.0014	GTTATTATTATTTTAGTTTTTTTTTTTA
31	C2C2dof_tnt.At4g38000_col_a_m1	At4g38000	Rice	4608	4635	-	17.4848	5.74e-07	0.0014	TTATTGTTATTATTATTTTAGTTTTTTT
32	ABI3VP1_tnt.VRN1_col_a_m1	VRN1	Rice	4598	4626	-	4.1194	5.78e-07	0.000908	TTATTATTTTAGTTTTTTTTTTTATTTAC
33	ABI3VP1_tnt.VRN1_col_a_m1	VRN1	Rice	4605	4633	-	3.89552	6.14e-07	0.000911	ATTGTTATTATTATTTTAGTTTTTTTTTT
34	C2C2dof_tnt.AT5G66940_col_a_m1	AT5G66940	Rice	2463	2491	+	17.303	6.28e-07	0.00286	CTTCCTTTTTTCTTTTCTTTCTTTTTTAC
35	ABI3VP1_tnt.VRN1_col_a_m1	VRN1	Rice	4120	4148	-	3.19403	7.43e-07	0.001	GGCCAATTTTTTTTTCATTGTTTTTTTTT
36	C2C2dof_tnt.OBP3_col_a_m1	OBP3	Rice	2145	2165	-	16.9848	7.45e-07	0.00395	TCTTCTTTTTTCCTTCTCCTA
37	ABI3VP1_tnt.VRN1_col_a_m1	VRN1	Rice	4114	4142	-	3.08955	7.64e-07	0.001	TTTTTTTTTCATTGTTTTTTTTTTCCACA
38	ND_tnt.FRS9_colamp_a_m1	FRS9	Rice	4390	4419	+	0.910891	7.68e-07	0.0494	TTAAAAATATTTAATTATGAAACATAGAAA
39	C2C2dof_tnt.At4g38000_col_a_m1	At4g38000	Rice	4117	4144	-	16.9545	8.72e-07	0.00197	AATTTTTTTTTCATTGTTTTTTTTTTCC
40	ABI3VP1_tnt.VRN1_col_a_m1	VRN1	Rice	4607	4635	-	2.43284	9.11e-07	0.00109	TTATTGTTATTATTATTTTAGTTTTTTTT
41	ABI3VP1_tnt.VRN1_colamp_a_m1	VRN1	Rice	4599	4617	-	16.8889	9.54e-07	0.00512	TAGTTTTTTTTTTTATTTA
42	REM_tnt.REM19_colamp_a_m1	REM19	Rice	4115	4135	+	16.6418	9.95e-07	0.00267	GTGGAAAAAAAAAACAATGAA
43	ABI3VP1_tnt.VRN1_col_a_m1	VRN1	Rice	4594	4622	-	2.01493	1.02e-06	0.00115	TATTTTAGTTTTTTTTTTTATTTACAAAC
44	C2C2dof_tnt.At4g38000_col_a_m1	At4g38000	Rice	2465	2492	+	16.6818	1.08e-06	0.0023	TCCTTTTTTCTTTTCTTTCTTTTTTACA
45	ND_tnt.FRS9_col_a_m1	FRS9	Rice	1096	1116	-	14.1061	1.13e-06	0.00294	CTCTCTTCATCTCTCTCAATA
46	C2C2dof_tnt.At4g38000_col_a_m1	At4g38000	Rice	4602	4629	-	16.5909	1.15e-06	0.00235	TTATTATTATTTTAGTTTTTTTTTTTAT
47	ABI3VP1_tnt.VRN1_col_a_m1	VRN1	Rice	4603	4631	-	1.23881	1.25e-06	0.00135	TGTTATTATTATTTTAGTTTTTTTTTTTA
48	ABI3VP1_tnt.VRN1_col_a_m1	VRN1	Rice	4604	4632	-	1.10448	1.29e-06	0.00136	TTGTTATTATTATTTTAGTTTTTTTTTTT
49	Trihelix_tnt.AT5G05550_colamp_a_m1	AT5G05550	Rice	3408	3422	+	16.3939	1.36e-06	0.0129	CATCTCCGGTGAGGT
50	ABI3VP1_tnt.VRN1_col_a_m1	VRN1	Rice	2461	2489	+	0.776119	1.41e-06	0.00141	GGCTTCCTTTTTTCTTTTCTTTCTTTTTT
51	C2C2dof_tnt.At4g38000_col_a_m1	At4g38000	Rice	4605	4632	-	16.2879	1.45e-06	0.00278	TTGTTATTATTATTTTAGTTTTTTTTTT
52	REM_tnt.REM19_colamp_a_m1	REM19	Rice	4597	4617	+	15.7164	1.68e-06	0.0032	TGTAAATAAAAAAAAAAACTA
53	Trihelix_tnt.AT3G58630_col_a_m1	AT3G58630	Rice	3407	3421	+	16.0909	1.86e-06	0.0177	CCATCTCCGGTGAGG
54	C2C2dof_tnt.OBP3_col_a_m1	OBP3	Rice	4122	4142	-	15.8636	1.92e-06	0.00718	TTTTTTTTTCATTGTTTTTTT
55	C2C2dof_tnt.OBP3_col_a_m1	OBP3	Rice	2462	2482	+	15.8485	1.95e-06	0.00718	GCTTCCTTTTTTCTTTTCTTT
56	Trihelix_tnt.AT3G58630_colamp_a_m1	AT3G58630	Rice	3407	3421	+	15.9697	1.96e-06	0.0186	CCATCTCCGGTGAGG
57	REM_tnt.REM19_colamp_a_m1	REM19	Rice	4595	4615	+	15.3881	2.01e-06	0.00324	TTTGTAAATAAAAAAAAAAAC
58	C2C2dof_tnt.OBP3_col_a_m1	OBP3	Rice	2464	2484	+	15.7879	2.04e-06	0.00718	TTCCTTTTTTCTTTTCTTTCT
59	Trihelix_tnt.At3g14180_col_m1	At3g14180	Rice	3409	3419	-	16.1515	2.08e-06	0.0199	TCACCGGAGAT
60	C2C2dof_tnt.AT1G69570_col_a_m1	AT1G69570	Rice	3046	3072	-	15.7273	2.17e-06	0.00927	TAGTTCCTTTATCTTGTTTCTTATTAA
61	REM_tnt.REM19_col_a_m1	REM19	Rice	3619	3633	-	15.8955	2.42e-06	0.00774	GAAAAAAAAAAGAGA
62	REM_tnt.REM19_colamp_a_m1	REM19	Rice	2473	2493	-	15.0448	2.42e-06	0.00354	ATGTAAAAAAGAAAGAAAAGA
63	REM_tnt.REM19_col_a_m1	REM19	Rice	4117	4131	+	15.8806	2.46e-06	0.00774	GGAAAAAAAAAACAA
64	ABI3VP1_tnt.VRN1_col_a_m1	VRN1	Rice	4116	4144	-	-1.43284	2.46e-06	0.00219	AATTTTTTTTTCATTGTTTTTTTTTTCCA
65	ABI3VP1_tnt.VRN1_colamp_a_m1	VRN1	Rice	3928	3946	+	14.9167	2.55e-06	0.00865	CTCTGTTTTTTTTCTTCCC
66	ND_tnt.FRS9_col_a_m1	FRS9	Rice	2030	2050	+	12.2121	2.57e-06	0.00573	CCCTCTCATTTTCCCCCTCTC
67	REM_tnt.REM19_col_a_m1	REM19	Rice	3931	3945	-	15.806	2.59e-06	0.00774	GGAAGAAAAAAAACA
68	C2C2dof_tnt.At4g38000_col_a_m1	At4g38000	Rice	2464	2491	+	15.4242	2.71e-06	0.00423	TTCCTTTTTTCTTTTCTTTCTTTTTTAC
69	REM_tnt.REM19_colamp_a_m1	REM19	Rice	3616	3636	-	14.8358	2.71e-06	0.00387	CTTGAAAAAAAAAAGAGACAC
70	ABI3VP1_tnt.VRN1_colamp_a_m1	VRN1	Rice	4115	4133	-	14.6667	2.86e-06	0.00921	CATTGTTTTTTTTTTCCAC
71	BBRBPC_tnt.BPC1_col_a_m1	BPC1	Rice	1096	1119	+	8.62121	2.89e-06	0.00629	TATTGAGAGAGATGAAGAGAGGAT
72	C2C2dof_tnt.OBP3_col_a_m1	OBP3	Rice	1189	1209	+	15.3333	2.93e-06	0.00733	TTTTCTTTTCTTTTCTGATTC
73	C2C2dof_tnt.AT1G69570_col_a_m1	AT1G69570	Rice	2473	2499	+	15.303	2.93e-06	0.0117	TCTTTTCTTTCTTTTTTACATTCTATA
74	C2C2dof_tnt.OBP3_colamp_a_m1	OBP3	Rice	2467	2485	+	14.697	3.05e-06	0.0253	CTTTTTTCTTTTCTTTCTT
75	ABI3VP1_tnt.VRN1_col_a_m1	VRN1	Rice	2464	2492	+	-2.37313	3.1e-06	0.00251	TTCCTTTTTTCTTTTCTTTCTTTTTTACA
76	C2H2_tnt.TF3A_col_a_m1	TF3A	Rice	2030	2048	+	14.744	3.25e-06	0.014	CCCTCTCATTTTCCCCCTC
77	C2C2dof_tnt.At4g38000_col_a_m1	At4g38000	Rice	4604	4631	-	15.1364	3.32e-06	0.00478	TGTTATTATTATTTTAGTTTTTTTTTTT
78	ABI3VP1_tnt.VRN1_col_a_m1	VRN1	Rice	4115	4143	-	-2.68657	3.35e-06	0.00264	ATTTTTTTTTCATTGTTTTTTTTTTCCAC
79	BBRBPC_tnt.BPC1_colamp_a_m1	BPC1	Rice	1100	1114	-	13.7879	3.48e-06	0.0148	CTCTTCATCTCTCTC
80	C2C2dof_tnt.OBP3_colamp_a_m1	OBP3	Rice	2994	3012	+	14.5303	3.65e-06	0.0253	CCTTTGCTGTAACTTTTTT
81	REM_tnt.REM19_col_a_m1	REM19	Rice	4602	4616	+	15.194	3.85e-06	0.00867	ATAAAAAAAAAAACT
82	ABI3VP1_tnt.VRN1_colamp_a_m1	VRN1	Rice	4117	4135	-	13.9444	3.96e-06	0.0105	TTCATTGTTTTTTTTTTCC
83	Trihelix_tnt.AT5G05550_col_a_m1	AT5G05550	Rice	3408	3422	+	15.1061	3.98e-06	0.0379	CATCTCCGGTGAGGT
84	ND_tnt.FRS9_col_a_m1	FRS9	Rice	2028	2048	+	11.1364	4e-06	0.00776	CCCCCTCTCATTTTCCCCCTC
85	BBRBPC_tnt.BPC5_colamp_a_m1	BPC5	Rice	1086	1114	+	6.13415	4.27e-06	0.00774	GGCTTTGAATTATTGAGAGAGATGAAGAG
86	C2C2dof_tnt.OBP3_col_a_m1	OBP3	Rice	2469	2489	+	14.8182	4.33e-06	0.00973	TTTTTCTTTTCTTTCTTTTTT
87	ABI3VP1_tnt.VRN1_colamp_a_m1	VRN1	Rice	4602	4620	-	13.6944	4.42e-06	0.0105	TTTTAGTTTTTTTTTTTAT
88	C2C2dof_tnt.OBP3_col_a_m1	OBP3	Rice	4599	4619	-	14.7879	4.43e-06	0.00973	TTTAGTTTTTTTTTTTATTTA
89	ABI3VP1_tnt.VRN1_colamp_a_m1	VRN1	Rice	4601	4619	-	13.6528	4.5e-06	0.0105	TTTAGTTTTTTTTTTTATT
90	C2C2dof_tnt.AT5G66940_colamp_a_m1	AT5G66940	Rice	2466	2486	+	14.6212	5.09e-06	0.0403	CCTTTTTTCTTTTCTTTCTTT
91	BBRBPC_tnt.BPC1_colamp_a_m1	BPC1	Rice	3920	3934	+	12.9394	5.16e-06	0.0164	CTCTTCCTCTCTGTT
92	ABI3VP1_tnt.VRN1_colamp_a_m1	VRN1	Rice	4118	4136	-	13.2917	5.24e-06	0.0106	TTTCATTGTTTTTTTTTTC
93	REM_tnt.REM19_colamp_a_m1	REM19	Rice	4121	4141	+	13.5522	5.26e-06	0.00555	AAAAAAAACAATGAAAAAAAA
94	BBRBPC_tnt.BPC5_colamp_a_m1	BPC5	Rice	2028	2056	-	5.43902	5.32e-06	0.00822	CAGGAGGAGAGGGGGAAAATGAGAGGGGG
95	ABI3VP1_tnt.VRN1_col_a_m1	VRN1	Rice	4595	4623	-	-4.65672	5.36e-06	0.00363	TTATTTTAGTTTTTTTTTTTATTTACAAA
96	C2C2dof_tnt.AT5G66940_colamp_a_m1	AT5G66940	Rice	2149	2169	-	14.5152	5.57e-06	0.0403	GTGTTCTTCTTTTTTCCTTCT
97	C2C2dof_tnt.AT5G66940_col_a_m1	AT5G66940	Rice	2149	2177	-	14.4091	5.77e-06	0.016	AAGTATCTGTGTTCTTCTTTTTTCCTTCT
98	REM_tnt.REM19_colamp_a_m1	REM19	Rice	4599	4619	+	13.3433	5.84e-06	0.00587	TAAATAAAAAAAAAAACTAAA
99	C2C2dof_tnt.At4g38000_col_a_m1	At4g38000	Rice	3548	3575	+	14.2879	5.91e-06	0.0068	CATATTCATTCTCAGAAGTTACTTTTTT
100	BBRBPC_tnt.BPC5_col_a_m1	BPC5	Rice	1101	1130	+	-32.8026	6.01e-06	0.0137	AGAGAGATGAAGAGAGGATTTCTTGGCGAG
101	BBRBPC_tnt.BPC5_colamp_a_m1	BPC5	Rice	2469	2497	-	5.03659	6.03e-06	0.00852	TAGAATGTAAAAAAGAAAGAAAAGAAAAA
102	BBRBPC_tnt.BPC1_col_a_m1	BPC1	Rice	2033	2056	-	6.28788	6.77e-06	0.00979	CAGGAGGAGAGGGGGAAAATGAGA
103	C2C2dof_tnt.At4g38000_col_a_m1	At4g38000	Rice	4116	4143	-	14.0758	6.79e-06	0.00742	ATTTTTTTTTCATTGTTTTTTTTTTCCA
104	C2C2dof_tnt.OBP3_col_a_m1	OBP3	Rice	3050	3070	-	14.197	6.82e-06	0.0121	GTTCCTTTATCTTGTTTCTTA
105	C2C2dof_tnt.OBP3_col_a_m1	OBP3	Rice	2468	2488	+	14.197	6.82e-06	0.0121	TTTTTTCTTTTCTTTCTTTTT
106	REM_tnt.REM19_col_a_m1	REM19	Rice	4604	4618	+	14.2537	7.1e-06	0.0108	AAAAAAAAAAACTAA
107	ND_tnt.FRS9_col_a_m1	FRS9	Rice	1098	1118	-	9.68182	7.14e-06	0.012	TCCTCTCTTCATCTCTCTCAA
108	C2C2dof_tnt.AT5G66940_col_a_m1	AT5G66940	Rice	2549	2577	-	14.0909	7.18e-06	0.0173	AATTTTATTCCCTTCCCTTTTCAATCATT
109	C2C2dof_tnt.AT5G66940_col_a_m1	AT5G66940	Rice	2955	2983	+	14.0606	7.33e-06	0.0173	ACATTTTCCTTTACTACTTTTAAGAAATA
110	C2C2dof_tnt.AT5G66940_colamp_a_m1	AT5G66940	Rice	3054	3074	-	14.1818	7.37e-06	0.0475	GTTAGTTCCTTTATCTTGTTT
111	REM_tnt.REM19_colamp_a_m1	REM19	Rice	2468	2488	-	12.8657	7.39e-06	0.00661	AAAAAGAAAGAAAAGAAAAAA
112	REM_tnt.REM19_colamp_a_m1	REM19	Rice	2471	2491	-	12.791	7.67e-06	0.00667	GTAAAAAAGAAAGAAAAGAAA
113	C2C2dof_tnt.OBP3_col_a_m1	OBP3	Rice	4604	4624	-	13.9848	7.93e-06	0.0133	ATTATTTTAGTTTTTTTTTTT
114	REM_tnt.REM19_col_a_m1	REM19	Rice	3930	3944	-	14.0299	8.1e-06	0.012	GAAGAAAAAAAACAG
115	C2C2dof_tnt.AT5G66940_col_a_m1	AT5G66940	Rice	3135	3163	-	13.8788	8.28e-06	0.0189	CCCCATCTTACTGTTACTTTTGTTTTCAA
116	C2C2dof_tnt.OBP3_colamp_a_m1	OBP3	Rice	1186	1204	+	13.7273	8.31e-06	0.0299	GTCTTTTCTTTTCTTTTCT
117	C2C2dof_tnt.AT1G69570_col_a_m1	AT1G69570	Rice	2460	2486	+	13.7424	8.31e-06	0.028	TGGCTTCCTTTTTTCTTTTCTTTCTTT
118	BBRBPC_tnt.BPC1_col_a_m1	BPC1	Rice	2466	2489	-	5.65152	8.47e-06	0.0105	AAAAAAGAAAGAAAAGAAAAAAGG
119	BBRBPC_tnt.BPC1_col_a_m1	BPC1	Rice	3921	3944	-	5.65152	8.47e-06	0.0105	GAAGAAAAAAAACAGAGAGGAAGA
120	C2C2dof_tnt.AT1G69570_col_a_m1	AT1G69570	Rice	1187	1213	+	13.6364	8.89e-06	0.0284	TCTTTTCTTTTCTTTTCTGATTCCAAA
121	BBRBPC_tnt.BPC5_colamp_a_m1	BPC5	Rice	2461	2489	-	3.71951	9e-06	0.0107	AAAAAAGAAAGAAAAGAAAAAAGGAAGCC
122	BBRBPC_tnt.BPC5_colamp_a_m1	BPC5	Rice	3920	3948	-	3.67073	9.13e-06	0.0107	ATGGGAAGAAAAAAAACAGAGAGGAAGAG
123	REM_tnt.REM19_colamp_a_m1	REM19	Rice	2466	2486	-	12.3731	9.38e-06	0.00754	AAAGAAAGAAAAGAAAAAAGG
124	BBRBPC_tnt.BPC5_col_a_m1	BPC5	Rice	3920	3949	-	-35.4342	9.45e-06	0.0167	AATGGGAAGAAAAAAAACAGAGAGGAAGAG
125	C2C2dof_tnt.AT5G66940_colamp_a_m1	AT5G66940	Rice	2459	2479	+	13.8636	9.54e-06	0.0478	GTGGCTTCCTTTTTTCTTTTC
126	ABI3VP1_tnt.VRN1_colamp_a_m1	VRN1	Rice	4600	4618	-	11.8056	9.57e-06	0.0137	TTAGTTTTTTTTTTTATTT
127	ABI3VP1_tnt.VRN1_col_a_m1	VRN1	Rice	2458	2486	+	-7.35821	9.98e-06	0.00518	TGTGGCTTCCTTTTTTCTTTTCTTTCTTT
128	ABI3VP1_tnt.VRN1_col_a_m1	VRN1	Rice	2459	2487	+	-7.49254	1.03e-05	0.00521	GTGGCTTCCTTTTTTCTTTTCTTTCTTTT
129	ABI3VP1_tnt.VRN1_colamp_a_m1	VRN1	Rice	4113	4131	-	11.5	1.08e-05	0.0141	TTGTTTTTTTTTTCCACAG
130	ABI3VP1_tnt.VRN1_col_a_m1	VRN1	Rice	2466	2494	+	-7.70149	1.08e-05	0.00533	CCTTTTTTCTTTTCTTTCTTTTTTACATT
131	C2C2dof_tnt.AT1G69570_col_a_m1	AT1G69570	Rice	2477	2503	+	13.3182	1.09e-05	0.0302	TTCTTTCTTTTTTACATTCTATATTGT
132	REM_tnt.REM19_col_a_m1	REM19	Rice	2464	2478	-	13.5224	1.09e-05	0.0149	AAAAGAAAAAAGGAA
133	ABI3VP1_tnt.VRN1_col_a_m1	VRN1	Rice	4608	4636	-	-7.8209	1.11e-05	0.00534	TTTATTGTTATTATTATTTTAGTTTTTTT
134	BBRBPC_tnt.BPC5_colamp_a_m1	BPC5	Rice	2477	2505	-	3.0122	1.11e-05	0.0123	TAACAATATAGAATGTAAAAAAGAAAGAA
135	ABI3VP1_tnt.VRN1_col_a_m1	VRN1	Rice	4606	4634	-	-7.95522	1.14e-05	0.00538	TATTGTTATTATTATTTTAGTTTTTTTTT
136	REM_tnt.REM19_colamp_a_m1	REM19	Rice	3618	3638	-	11.9254	1.16e-05	0.00848	GTCTTGAAAAAAAAAAGAGAC
137	C2C2dof_tnt.At4g38000_col_a_m1	At4g38000	Rice	4609	4636	-	13.2273	1.17e-05	0.0113	TTTATTGTTATTATTATTTTAGTTTTTT
138	REM_tnt.REM19_colamp_a_m1	REM19	Rice	1530	1550	-	11.8507	1.2e-05	0.00867	ACAATCAACAAAAAAATCCAA
139	C2C2dof_tnt.OBP3_col_a_m1	OBP3	Rice	2479	2499	+	13.3636	1.21e-05	0.018	CTTTCTTTTTTACATTCTATA
140	ABI3VP1_tnt.VRN1_col_a_m1	VRN1	Rice	2149	2177	-	-8.26866	1.22e-05	0.00565	AAGTATCTGTGTTCTTCTTTTTTCCTTCT
141	REM_tnt.REM19_colamp_a_m1	REM19	Rice	4603	4623	+	11.806	1.23e-05	0.00867	TAAAAAAAAAAACTAAAATAA
142	ABI3VP1_tnt.VRN1_col_a_m1	VRN1	Rice	4121	4149	-	-8.29851	1.23e-05	0.00565	TGGCCAATTTTTTTTTCATTGTTTTTTTT
143	REM_tnt.REM19_colamp_a_m1	REM19	Rice	1187	1207	-	11.7164	1.28e-05	0.00875	ATCAGAAAAGAAAAGAAAAGA
144	ABI3VP1_tnt.VRN1_col_a_m1	VRN1	Rice	2465	2493	+	-8.50746	1.29e-05	0.00574	TCCTTTTTTCTTTTCTTTCTTTTTTACAT
145	C2C2dof_tnt.OBP3_col_a_m1	OBP3	Rice	4598	4618	-	13.2727	1.29e-05	0.0187	TTAGTTTTTTTTTTTATTTAC
146	BBRBPC_tnt.BPC5_colamp_a_m1	BPC5	Rice	2471	2499	-	2.40244	1.33e-05	0.0136	TATAGAATGTAAAAAAGAAAGAAAAGAAA
147	REM_tnt.REM19_colamp_a_m1	REM19	Rice	3617	3637	-	11.597	1.35e-05	0.00896	TCTTGAAAAAAAAAAGAGACA
148	ND_tnt.FRS9_col_a_m1	FRS9	Rice	2034	2054	+	7.9697	1.36e-05	0.0188	CTCATTTTCCCCCTCTCCTCC
149	ND_tnt.FRS9_col_a_m1	FRS9	Rice	2469	2489	+	7.93939	1.38e-05	0.0188	TTTTTCTTTTCTTTCTTTTTT
150	BBRBPC_tnt.BPC1_col_a_m1	BPC1	Rice	1092	1115	+	4.19697	1.4e-05	0.0151	GAATTATTGAGAGAGATGAAGAGA
151	BBRBPC_tnt.BPC5_colamp_a_m1	BPC5	Rice	2475	2503	-	2.21951	1.4e-05	0.0138	ACAATATAGAATGTAAAAAAGAAAGAAAA
152	BBRBPC_tnt.BPC1_col_a_m1	BPC1	Rice	2035	2058	-	4.12121	1.43e-05	0.0151	CTCAGGAGGAGAGGGGGAAAATGA
153	C2C2dof_tnt.OBP3_colamp_a_m1	OBP3	Rice	2462	2480	+	13.1364	1.45e-05	0.0373	GCTTCCTTTTTTCTTTTCT
154	ABI3VP1_tnt.VRN1_colamp_a_m1	VRN1	Rice	1184	1202	+	10.6528	1.48e-05	0.0167	AAGTCTTTTCTTTTCTTTT
155	ABI3VP1_tnt.VRN1_col_a_m1	VRN1	Rice	4111	4139	-	-9.20896	1.5e-05	0.00625	TTTTTTCATTGTTTTTTTTTTCCACAGAC
156	ND_tnt.FRS9_col_a_m1	FRS9	Rice	1094	1114	-	7.56061	1.58e-05	0.0195	CTCTTCATCTCTCTCAATAAT
157	C2C2dof_tnt.OBP3_col_a_m1	OBP3	Rice	2465	2485	+	12.9394	1.61e-05	0.0202	TCCTTTTTTCTTTTCTTTCTT
158	ABI3VP1_tnt.VRN1_colamp_a_m1	VRN1	Rice	3926	3944	+	10.375	1.63e-05	0.0177	CTCTCTGTTTTTTTTCTTC
159	BBRBPC_tnt.BPC1_col_a_m1	BPC1	Rice	2464	2487	-	3.69697	1.65e-05	0.0159	AAAAGAAAGAAAAGAAAAAAGGAA
160	C2C2dof_tnt.AT1G69570_col_a_m1	AT1G69570	Rice	2141	2167	-	12.6212	1.66e-05	0.0333	GTTCTTCTTTTTTCCTTCTCCTAGTTA
161	REM_tnt.REM19_col_a_m1	REM19	Rice	28	42	-	12.791	1.66e-05	0.0166	AACAGAGAAAAAACA
162	ABI3VP1_tnt.VRN1_col_a_m1	VRN1	Rice	2454	2482	+	-9.77612	1.7e-05	0.00673	TTGCTGTGGCTTCCTTTTTTCTTTTCTTT
163	REM_tnt.REM19_colamp_a_m1	REM19	Rice	3615	3635	-	11.0896	1.7e-05	0.0105	TTGAAAAAAAAAAGAGACACA
164	ABI3VP1_tnt.VRN1_col_a_m1	VRN1	Rice	2460	2488	+	-9.80597	1.71e-05	0.00673	TGGCTTCCTTTTTTCTTTTCTTTCTTTTT
165	REM_tnt.REM19_col_a_m1	REM19	Rice	4118	4132	+	12.7164	1.73e-05	0.0166	GAAAAAAAAAACAAT
166	REM_tnt.REM19_colamp_a_m1	REM19	Rice	2472	2492	-	10.9254	1.84e-05	0.0107	TGTAAAAAAGAAAGAAAAGAA
167	C2C2dof_tnt.At4g38000_col_a_m1	At4g38000	Rice	3925	3952	+	12.4848	1.84e-05	0.0148	CCTCTCTGTTTTTTTTCTTCCCATTTTG
168	ABI3VP1_tnt.VRN1_colamp_a_m1	VRN1	Rice	4114	4132	-	10.0417	1.84e-05	0.0183	ATTGTTTTTTTTTTCCACA
169	REM_tnt.REM19_col_a_m1	REM19	Rice	2469	2483	-	12.5821	1.85e-05	0.0173	GAAAGAAAAGAAAAA
170	ND_tnt.FRS9_col_a_m1	FRS9	Rice	3918	3938	+	7.12121	1.86e-05	0.0216	GGCTCTTCCTCTCTGTTTTTT
171	REM_tnt.REM19_colamp_a_m1	REM19	Rice	2467	2487	-	10.8955	1.86e-05	0.0108	AAAAGAAAGAAAAGAAAAAAG
172	BBRBPC_tnt.BPC5_colamp_a_m1	BPC5	Rice	2030	2058	-	1.17073	1.89e-05	0.017	CTCAGGAGGAGAGGGGGAAAATGAGAGGG
173	ABI3VP1_tnt.VRN1_colamp_a_m1	VRN1	Rice	1374	1392	+	9.95833	1.9e-05	0.0183	AACCATTTTTTTTTATCGC
174	ABI3VP1_tnt.VRN1_colamp_a_m1	VRN1	Rice	2470	2488	+	9.95833	1.9e-05	0.0183	TTTTCTTTTCTTTCTTTTT
175	C2C2dof_tnt.AT5G66940_col_a_m1	AT5G66940	Rice	1182	1210	+	12.5606	1.92e-05	0.035	TCAAGTCTTTTCTTTTCTTTTCTGATTCC
176	C2C2dof_tnt.AT5G66940_col_a_m1	AT5G66940	Rice	2990	3018	+	12.5152	1.97e-05	0.035	AGTACCTTTGCTGTAACTTTTTTTTTCAA
177	BBRBPC_tnt.BPC5_colamp_a_m1	BPC5	Rice	3924	3952	-	0.926829	2.02e-05	0.0176	CAAAATGGGAAGAAAAAAAACAGAGAGGA
178	C2H2_tnt.TF3A_col_a_m1	TF3A	Rice	3328	3346	-	11.584	2.1e-05	0.0329	TCACCTTCGCCCCCGCCTC
179	C2C2dof_tnt.AT5G66940_col_a_m1	AT5G66940	Rice	2475	2503	+	12.3939	2.12e-05	0.035	TTTTCTTTCTTTTTTACATTCTATATTGT
180	REM_tnt.REM19_colamp_a_m1	REM19	Rice	3928	3948	-	10.5821	2.14e-05	0.012	ATGGGAAGAAAAAAAACAGAG
181	BBRBPC_tnt.BPC5_colamp_a_m1	BPC5	Rice	2467	2495	-	0.719512	2.15e-05	0.0177	GAATGTAAAAAAGAAAGAAAAGAAAAAAG
182	C2C2dof_tnt.OBP3_col_a_m1	OBP3	Rice	4121	4141	-	12.4848	2.15e-05	0.0236	TTTTTTTTCATTGTTTTTTTT
183	REM_tnt.REM19_colamp_a_m1	REM19	Rice	1188	1208	-	10.5224	2.2e-05	0.0122	AATCAGAAAAGAAAAGAAAAG
184	REM_tnt.REM19_colamp_a_m1	REM19	Rice	2463	2483	-	10.5075	2.21e-05	0.0122	GAAAGAAAAGAAAAAAGGAAG
185	C2C2dof_tnt.At4g38000_col_a_m1	At4g38000	Rice	4607	4634	-	12.1515	2.24e-05	0.0161	TATTGTTATTATTATTTTAGTTTTTTTT
186	BBRBPC_tnt.BPC5_colamp_a_m1	BPC5	Rice	3926	3954	-	0.536585	2.26e-05	0.0184	GACAAAATGGGAAGAAAAAAAACAGAGAG
187	ND_tnt.FRS9_col_a_m1	FRS9	Rice	2036	2056	+	6.51515	2.3e-05	0.0241	CATTTTCCCCCTCTCCTCCTG
188	ABI3VP1_tnt.VRN1_col_a_m1	VRN1	Rice	3913	3941	+	-11.209	2.31e-05	0.00834	CACTAGGCTCTTCCTCTCTGTTTTTTTTC
189	BBRBPC_tnt.BPC1_col_a_m1	BPC1	Rice	2476	2499	-	2.68182	2.31e-05	0.0178	TATAGAATGTAAAAAAGAAAGAAA
190	BBRBPC_tnt.BPC1_col_a_m1	BPC1	Rice	2478	2501	-	2.68182	2.31e-05	0.0178	AATATAGAATGTAAAAAAGAAAGA
191	ABI3VP1_tnt.VRN1_colamp_a_m1	VRN1	Rice	3618	3636	+	9.33333	2.36e-05	0.0201	GTCTCTTTTTTTTTTCAAG
192	C2C2dof_tnt.OBP3_col_a_m1	OBP3	Rice	2475	2495	+	12.3333	2.36e-05	0.0241	TTTTCTTTCTTTTTTACATTC
193	C2C2dof_tnt.At4g38000_col_a_m1	At4g38000	Rice	4122	4149	-	12.0455	2.38e-05	0.0161	TGGCCAATTTTTTTTTCATTGTTTTTTT
194	C2C2dof_tnt.At4g38000_col_a_m1	At4g38000	Rice	2461	2488	+	12.0455	2.38e-05	0.0161	GGCTTCCTTTTTTCTTTTCTTTCTTTTT
195	ND_tnt.FRS9_col_a_m1	FRS9	Rice	2032	2052	+	6.37879	2.41e-05	0.0249	CTCTCATTTTCCCCCTCTCCT
196	REM_tnt.REM19_col_a_m1	REM19	Rice	4115	4129	+	12.0597	2.43e-05	0.0206	GTGGAAAAAAAAAAC
197	BBRBPC_tnt.BPC5_colamp_a_m1	BPC5	Rice	3932	3960	-	0.207317	2.47e-05	0.0196	CGGAGTGACAAAATGGGAAGAAAAAAAAC
198	C2C2dof_tnt.OBP3_col_a_m1	OBP3	Rice	2471	2491	+	12.2576	2.48e-05	0.0241	TTTCTTTTCTTTCTTTTTTAC
199	REM_tnt.REM19_col_a_m1	REM19	Rice	5122	5136	-	12.0149	2.49e-05	0.0206	GAAAGAAAATTAAAA
200	REM_tnt.REM19_col_a_m1	REM19	Rice	2150	2164	+	11.9851	2.52e-05	0.0206	GAAGGAAAAAAGAAG
201	REM_tnt.REM19_colamp_a_m1	REM19	Rice	4114	4134	+	10.194	2.54e-05	0.0136	TGTGGAAAAAAAAAACAATGA
202	ABI3VP1_tnt.VRN1_col_a_m1	VRN1	Rice	4610	4638	-	-11.7015	2.56e-05	0.00884	ATTTTATTGTTATTATTATTTTAGTTTTT
203	ABI3VP1_tnt.VRN1_col_a_m1	VRN1	Rice	2470	2498	+	-11.7164	2.57e-05	0.00884	TTTTCTTTTCTTTCTTTTTTACATTCTAT
204	BBRBPC_tnt.BPC5_colamp_a_m1	BPC5	Rice	2468	2496	-	0.0121951	2.61e-05	0.0202	AGAATGTAAAAAAGAAAGAAAAGAAAAAA
205	C2C2dof_tnt.OBP3_col_a_m1	OBP3	Rice	1184	1204	+	12.1667	2.62e-05	0.0245	AAGTCTTTTCTTTTCTTTTCT
206	C2H2_tnt.TF3A_col_a_m1	TF3A	Rice	2033	2051	+	11.176	2.62e-05	0.038	TCTCATTTTCCCCCTCTCC
207	C2C2dof_tnt.AT5G66940_col_a_m1	AT5G66940	Rice	2468	2496	+	12.0303	2.63e-05	0.04	TTTTTTCTTTTCTTTCTTTTTTACATTCT
208	C2C2dof_tnt.At4g38000_col_a_m1	At4g38000	Rice	2555	2582	-	11.8636	2.65e-05	0.017	TTCTAAATTTTATTCCCTTCCCTTTTCA
209	C2C2dof_tnt.At4g38000_col_a_m1	At4g38000	Rice	4253	4280	-	11.8636	2.65e-05	0.017	TTAATTTAGTTTTTTATTTAATATTTCT
210	REM_tnt.REM19_colamp_a_m1	REM19	Rice	4125	4145	+	10.0896	2.66e-05	0.0139	AAAACAATGAAAAAAAAATTG
211	C2C2dof_tnt.AT1G69570_col_a_m1	AT1G69570	Rice	3047	3073	-	11.7727	2.7e-05	0.0434	TTAGTTCCTTTATCTTGTTTCTTATTA
212	BBRBPC_tnt.BPC5_colamp_a_m1	BPC5	Rice	2463	2491	-	-0.121951	2.71e-05	0.0202	GTAAAAAAGAAAGAAAAGAAAAAAGGAAG
213	C2C2dof_tnt.AT1G69570_col_a_m1	AT1G69570	Rice	3000	3026	+	11.7576	2.73e-05	0.0434	CTGTAACTTTTTTTTTCAAACTAAATA
214	C2C2dof_tnt.At4g38000_col_a_m1	At4g38000	Rice	2556	2583	-	11.7879	2.77e-05	0.017	TTTCTAAATTTTATTCCCTTCCCTTTTC
215	C2C2dof_tnt.AT1G69570_col_a_m1	AT1G69570	Rice	3127	3153	-	11.7121	2.8e-05	0.0434	CTGTTACTTTTGTTTTCAAATAATTGC
216	ABI3VP1_tnt.VRN1_col_a_m1	VRN1	Rice	1181	1209	+	-12.1642	2.82e-05	0.0093	CTCAAGTCTTTTCTTTTCTTTTCTGATTC
217	C2C2dof_tnt.At4g38000_col_a_m1	At4g38000	Rice	2472	2499	+	11.7424	2.84e-05	0.017	TTCTTTTCTTTCTTTTTTACATTCTATA
218	ABI3VP1_tnt.VRN1_col_a_m1	VRN1	Rice	1182	1210	+	-12.2239	2.85e-05	0.00932	TCAAGTCTTTTCTTTTCTTTTCTGATTCC
219	C2C2dof_tnt.AT5G66940_col_a_m1	AT5G66940	Rice	2142	2170	-	11.8788	2.87e-05	0.0423	TGTGTTCTTCTTTTTTCCTTCTCCTAGTT
220	ABI3VP1_tnt.VRN1_col_a_m1	VRN1	Rice	2468	2496	+	-12.2836	2.89e-05	0.00932	TTTTTTCTTTTCTTTCTTTTTTACATTCT
221	C2C2dof_tnt.At4g38000_col_a_m1	At4g38000	Rice	4614	4641	-	11.697	2.92e-05	0.0171	CTAATTTTATTGTTATTATTATTTTAGT
222	ABI3VP1_tnt.VRN1_col_a_m1	VRN1	Rice	4123	4151	-	-12.403	2.96e-05	0.00942	GATGGCCAATTTTTTTTTCATTGTTTTTT
223	ABI3VP1_tnt.VRN1_colamp_a_m1	VRN1	Rice	1530	1548	+	8.625	3e-05	0.0226	TTGGATTTTTTTGTTGATT
224	REM_tnt.REM19_colamp_a_m1	REM19	Rice	1186	1206	-	9.80597	3.01e-05	0.0151	TCAGAAAAGAAAAGAAAAGAC
225	ABI3VP1_tnt.VRN1_colamp_a_m1	VRN1	Rice	2465	2483	+	8.58333	3.04e-05	0.0226	TCCTTTTTTCTTTTCTTTC
226	REM_tnt.REM19_col_a_m1	REM19	Rice	3929	3943	-	11.5672	3.13e-05	0.0238	AAGAAAAAAAACAGA
227	BBRBPC_tnt.BPC1_col_a_m1	BPC1	Rice	2025	2048	-	1.69697	3.17e-05	0.0228	GAGGGGGAAAATGAGAGGGGGTTG
228	ABI3VP1_tnt.VRN1_col_a_m1	VRN1	Rice	3606	3634	+	-12.8955	3.28e-05	0.0102	AAAATTACATGTGTCTCTTTTTTTTTTCA
229	BBRBPC_tnt.BPC1_col_a_m1	BPC1	Rice	2462	2485	-	1.59091	3.28e-05	0.0231	AAGAAAGAAAAGAAAAAAGGAAGC
230	C2C2dof_tnt.AT1G69570_col_a_m1	AT1G69570	Rice	3616	3642	+	11.4242	3.28e-05	0.0478	GTGTCTCTTTTTTTTTTCAAGACTGGT
231	ABI3VP1_tnt.VRN1_colamp_a_m1	VRN1	Rice	3620	3638	+	8.34722	3.29e-05	0.0226	CTCTTTTTTTTTTCAAGAC
232	C2C2dof_tnt.OBP3_col_a_m1	OBP3	Rice	2480	2500	+	11.7727	3.33e-05	0.0298	TTTCTTTTTTACATTCTATAT
233	BBRBPC_tnt.BPC5_col_a_m1	BPC5	Rice	2461	2490	-	-42.6053	3.34e-05	0.0356	TAAAAAAGAAAGAAAAGAAAAAAGGAAGCC
234	BBRBPC_tnt.BPC1_col_a_m1	BPC1	Rice	3925	3948	-	1.5303	3.34e-05	0.0233	ATGGGAAGAAAAAAAACAGAGAGG
235	ABI3VP1_tnt.VRN1_col_a_m1	VRN1	Rice	3609	3637	+	-13.0448	3.38e-05	0.0104	ATTACATGTGTCTCTTTTTTTTTTCAAGA
236	BBRBPC_tnt.BPC1_col_a_m1	BPC1	Rice	2470	2493	-	1.45455	3.43e-05	0.0236	ATGTAAAAAAGAAAGAAAAGAAAA
237	REM_tnt.REM19_colamp_a_m1	REM19	Rice	4604	4624	+	9.49254	3.44e-05	0.017	AAAAAAAAAAACTAAAATAAT
238	REM_tnt.REM19_col_a_m1	REM19	Rice	4116	4130	+	11.3582	3.48e-05	0.0252	TGGAAAAAAAAAACA
239	ABI3VP1_tnt.VRN1_col_a_m1	VRN1	Rice	3608	3636	+	-13.194	3.49e-05	0.0107	AATTACATGTGTCTCTTTTTTTTTTCAAG
240	BBRBPC_tnt.BPC5_colamp_a_m1	BPC5	Rice	2032	2060	-	-1.07317	3.51e-05	0.024	GGCTCAGGAGGAGAGGGGGAAAATGAGAG
241	BBRBPC_tnt.BPC1_colamp_a_m1	BPC1	Rice	3922	3936	+	8.16667	3.57e-05	0.0435	CTTCCTCTCTGTTTT
242	ABI3VP1_tnt.VRN1_col_a_m1	VRN1	Rice	4122	4150	-	-13.3134	3.57e-05	0.0107	ATGGCCAATTTTTTTTTCATTGTTTTTTT
243	ND_tnt.FRS9_col_a_m1	FRS9	Rice	542	562	+	5.19697	3.63e-05	0.0341	ATTTTTCACTCACTCTTTACA
244	BBRBPC_tnt.BPC5_col_a_m1	BPC5	Rice	2457	2486	-	-43.1447	3.68e-05	0.0356	AAAGAAAGAAAAGAAAAAAGGAAGCCACAG
245	BBRBPC_tnt.BPC5_colamp_a_m1	BPC5	Rice	3918	3946	-	-1.28049	3.71e-05	0.0245	GGGAAGAAAAAAAACAGAGAGGAAGAGCC
246	REM_tnt.REM19_colamp_a_m1	REM19	Rice	4124	4144	+	9.31343	3.71e-05	0.0178	AAAAACAATGAAAAAAAAATT
247	REM_tnt.REM19_col_a_m1	REM19	Rice	4607	4621	+	11.2239	3.72e-05	0.0256	AAAAAAAACTAAAAT
248	C2H2_tnt.TF3A_col_a_m1	TF3A	Rice	3819	3837	-	10.512	3.75e-05	0.0389	CTTCACCTTGATCATCCAC
249	C2C2dof_tnt.OBP3_col_a_m1	OBP3	Rice	3002	3022	+	11.5606	3.77e-05	0.0316	GTAACTTTTTTTTTCAAACTA
250	REM_tnt.REM19_colamp_a_m1	REM19	Rice	2461	2481	-	9.26866	3.78e-05	0.0178	AAGAAAAGAAAAAAGGAAGCC
251	ND_tnt.FRS9_col_a_m1	FRS9	Rice	2465	2485	+	5.06061	3.8e-05	0.0344	TCCTTTTTTCTTTTCTTTCTT
252	C2C2dof_tnt.At4g38000_col_a_m1	At4g38000	Rice	2460	2487	+	11.2121	3.83e-05	0.0215	TGGCTTCCTTTTTTCTTTTCTTTCTTTT
253	ABI3VP1_tnt.VRN1_colamp_a_m1	VRN1	Rice	23	41	+	7.84722	3.87e-05	0.0247	TAGTCTGTTTTTTCTCTGT
254	C2C2dof_tnt.AT5G66940_col_a_m1	AT5G66940	Rice	4602	4630	-	11.3333	3.92e-05	0.0454	GTTATTATTATTTTAGTTTTTTTTTTTAT
255	BBRBPC_tnt.BPC1_col_a_m1	BPC1	Rice	3915	3938	-	1	3.95e-05	0.0263	AAAAAACAGAGAGGAAGAGCCTAG
256	REM_tnt.REM19_colamp_a_m1	REM19	Rice	4118	4138	+	9.14925	3.98e-05	0.0185	GAAAAAAAAAACAATGAAAAA
257	C2C2dof_tnt.At4g38000_col_a_m1	At4g38000	Rice	2458	2485	+	11.1364	4e-05	0.0222	TGTGGCTTCCTTTTTTCTTTTCTTTCTT
258	REM_tnt.REM19_col_a_m1	REM19	Rice	1188	1202	-	11.0746	4.01e-05	0.027	AAAAGAAAAGAAAAG
259	C2C2dof_tnt.AT5G66940_col_a_m1	AT5G66940	Rice	3606	3634	+	11.2879	4.02e-05	0.0454	AAAATTACATGTGTCTCTTTTTTTTTTCA
260	BBRBPC_tnt.BPC5_colamp_a_m1	BPC5	Rice	2473	2501	-	-1.62195	4.06e-05	0.0257	AATATAGAATGTAAAAAAGAAAGAAAAGA
261	BBRBPC_tnt.BPC1_colamp_a_m1	BPC1	Rice	1102	1116	-	7.75758	4.15e-05	0.047	CTCTCTTCATCTCTC
262	C2C2dof_tnt.At4g38000_col_a_m1	At4g38000	Rice	2453	2480	+	11.0606	4.17e-05	0.0222	ATTGCTGTGGCTTCCTTTTTTCTTTTCT
263	C2C2dof_tnt.AT5G66940_col_a_m1	AT5G66940	Rice	4260	4288	-	11.2121	4.2e-05	0.0454	ATGCATCCTTAATTTAGTTTTTTATTTAA
264	REM_tnt.REM19_col_a_m1	REM19	Rice	2471	2485	-	10.9701	4.21e-05	0.0278	AAGAAAGAAAAGAAA
265	C2C2dof_tnt.OBP3_col_a_m1	OBP3	Rice	3618	3638	+	11.3636	4.23e-05	0.0345	GTCTCTTTTTTTTTTCAAGAC
266	REM_tnt.REM19_colamp_a_m1	REM19	Rice	4605	4625	+	9	4.23e-05	0.0194	AAAAAAAAAACTAAAATAATA
267	REM_tnt.REM19_colamp_a_m1	REM19	Rice	5119	5139	-	8.97015	4.29e-05	0.0194	TTAGAAAGAAAATTAAAACAA
268	BBRBPC_tnt.BPC5_colamp_a_m1	BPC5	Rice	1269	1297	-	-1.85366	4.32e-05	0.0268	GGATGGAAGAGTAGTAGTATGAGATAGAG
269	ABI3VP1_tnt.VRN1_colamp_a_m1	VRN1	Rice	2148	2166	-	7.5	4.33e-05	0.0265	TTCTTCTTTTTTCCTTCTC
270	C2C2dof_tnt.OBP3_col_a_m1	OBP3	Rice	4123	4143	-	11.2727	4.46e-05	0.035	ATTTTTTTTTCATTGTTTTTT
271	REM_tnt.REM19_colamp_a_m1	REM19	Rice	2464	2484	-	8.86567	4.48e-05	0.0198	AGAAAGAAAAGAAAAAAGGAA
272	ABI3VP1_tnt.VRN1_col_a_m1	VRN1	Rice	2456	2484	+	-14.4328	4.48e-05	0.0126	GCTGTGGCTTCCTTTTTTCTTTTCTTTCT
273	C2H2_tnt.TF3A_col_a_m1	TF3A	Rice	524	542	-	10.168	4.51e-05	0.0399	TCTCTTCTTCATCTGCTCC
274	REM_tnt.REM19_col_a_m1	REM19	Rice	2475	2489	-	10.806	4.55e-05	0.0283	AAAAAAGAAAGAAAA
275	BBRBPC_tnt.BPC5_col_a_m1	BPC5	Rice	3930	3959	-	-44.4211	4.56e-05	0.0392	GGAGTGACAAAATGGGAAGAAAAAAAACAG
276	REM_tnt.REM19_col_a_m1	REM19	Rice	3618	3632	-	10.7761	4.61e-05	0.0284	AAAAAAAAAAGAGAC
277	C2H2_tnt.TF3A_col_a_m1	TF3A	Rice	2038	2056	+	10.048	4.8e-05	0.0407	TTTTCCCCCTCTCCTCCTG
278	C2C2dof_tnt.At4g38000_col_a_m1	At4g38000	Rice	2155	2182	-	10.7727	4.88e-05	0.0245	TACCAAAGTATCTGTGTTCTTCTTTTTT
279	ABI3VP1_tnt.VRN1_colamp_a_m1	VRN1	Rice	1189	1207	+	7.11111	4.89e-05	0.0276	TTTTCTTTTCTTTTCTGAT
280	ABI3VP1_tnt.VRN1_col_a_m1	VRN1	Rice	4612	4640	-	-14.9104	4.93e-05	0.0135	TAATTTTATTGTTATTATTATTTTAGTTT
281	C2C2dof_tnt.OBP3_col_a_m1	OBP3	Rice	2466	2486	+	11.0758	4.99e-05	0.0365	CCTTTTTTCTTTTCTTTCTTT
282	ABI3VP1_tnt.VRN1_col_a_m1	VRN1	Rice	4614	4642	-	-15	5.02e-05	0.0137	ACTAATTTTATTGTTATTATTATTTTAGT
283	REM_tnt.REM19_colamp_a_m1	REM19	Rice	4119	4139	+	8.50746	5.19e-05	0.0217	AAAAAAAAAACAATGAAAAAA
284	C2H2_tnt.TF3A_col_a_m1	TF3A	Rice	1100	1118	-	9.88	5.24e-05	0.0427	TCCTCTCTTCATCTCTCTC
285	ABI3VP1_tnt.VRN1_col_a_m1	VRN1	Rice	4596	4624	-	-15.2388	5.26e-05	0.014	ATTATTTTAGTTTTTTTTTTTATTTACAA
286	REM_tnt.REM19_colamp_a_m1	REM19	Rice	2469	2489	-	8.44776	5.32e-05	0.0219	AAAAAAGAAAGAAAAGAAAAA
287	BBRBPC_tnt.BPC5_col_a_m1	BPC5	Rice	1093	1122	+	-45.5526	5.39e-05	0.0432	AATTATTGAGAGAGATGAAGAGAGGATTTC
288	BBRBPC_tnt.BPC5_col_a_m1	BPC5	Rice	2026	2055	-	-45.6053	5.43e-05	0.0432	AGGAGGAGAGGGGGAAAATGAGAGGGGGTT
289	C2C2dof_tnt.OBP3_col_a_m1	OBP3	Rice	3922	3942	+	10.9091	5.48e-05	0.0377	CTTCCTCTCTGTTTTTTTTCT
290	C2C2dof_tnt.OBP3_col_a_m1	OBP3	Rice	4126	4146	-	10.8939	5.53e-05	0.0377	CCAATTTTTTTTTCATTGTTT
291	REM_tnt.REM19_colamp_a_m1	REM19	Rice	1185	1205	-	8.34328	5.55e-05	0.0225	CAGAAAAGAAAAGAAAAGACT
292	C2C2dof_tnt.OBP3_col_a_m1	OBP3	Rice	4255	4275	-	10.8636	5.62e-05	0.0377	TTAGTTTTTTATTTAATATTT
293	ABI3VP1_tnt.VRN1_colamp_a_m1	VRN1	Rice	3927	3945	+	6.63889	5.66e-05	0.0299	TCTCTGTTTTTTTTCTTCC
294	REM_tnt.REM19_col_a_m1	REM19	Rice	1190	1204	-	10.3134	5.72e-05	0.0319	AGAAAAGAAAAGAAA
295	REM_tnt.REM19_col_a_m1	REM19	Rice	3621	3635	-	10.2985	5.76e-05	0.0319	TTGAAAAAAAAAAGA
296	BBRBPC_tnt.BPC1_col_a_m1	BPC1	Rice	3919	3942	-	-0.227273	5.77e-05	0.0343	AGAAAAAAAACAGAGAGGAAGAGC
297	C2C2dof_tnt.At4g38000_col_a_m1	At4g38000	Rice	4598	4625	-	10.4394	5.83e-05	0.0274	TATTATTTTAGTTTTTTTTTTTATTTAC
298	ABI3VP1_tnt.VRN1_col_a_m1	VRN1	Rice	5111	5139	+	-15.7612	5.83e-05	0.015	AGTATAAGTTGTTTTAATTTTCTTTCTAA
299	BBRBPC_tnt.BPC1_col_a_m1	BPC1	Rice	2468	2491	-	-0.333333	5.96e-05	0.0343	GTAAAAAAGAAAGAAAAGAAAAAA
300	ABI3VP1_tnt.VRN1_col_a_m1	VRN1	Rice	15	43	+	-15.9851	6.09e-05	0.0156	TTGTTAACTAGTCTGTTTTTTCTCTGTTG
301	ABI3VP1_tnt.VRN1_col_a_m1	VRN1	Rice	3604	3632	+	-16.0448	6.16e-05	0.0156	GTAAAATTACATGTGTCTCTTTTTTTTTT
302	BBRBPC_tnt.BPC1_col_a_m1	BPC1	Rice	2151	2174	+	-0.469697	6.21e-05	0.0345	AAGGAAAAAAGAAGAACACAGATA
303	BBRBPC_tnt.BPC5_colamp_a_m1	BPC5	Rice	2136	2164	+	-3.30488	6.3e-05	0.032	CCAGCTAACTAGGAGAAGGAAAAAAGAAG
304	ABI3VP1_tnt.VRN1_col_a_m1	VRN1	Rice	4256	4284	-	-16.1791	6.33e-05	0.0157	ATCCTTAATTTAGTTTTTTATTTAATATT
305	BBRBPC_tnt.BPC1_col_a_m1	BPC1	Rice	2031	2054	-	-0.560606	6.38e-05	0.0352	GGAGGAGAGGGGGAAAATGAGAGG
306	REM_tnt.REM19_colamp_a_m1	REM19	Rice	4257	4277	+	7.98507	6.41e-05	0.0247	ATATTAAATAAAAAACTAAAT
307	REM_tnt.REM19_col_a_m1	REM19	Rice	4598	4612	+	10.0597	6.44e-05	0.0341	GTAAATAAAAAAAAA
308	REM_tnt.REM19_col_a_m1	REM19	Rice	3617	3631	-	10.0448	6.49e-05	0.0341	AAAAAAAAAGAGACA
309	ABI3VP1_tnt.VRN1_colamp_a_m1	VRN1	Rice	2464	2482	+	6.16667	6.53e-05	0.0319	TTCCTTTTTTCTTTTCTTT
310	BBRBPC_tnt.BPC5_colamp_a_m1	BPC5	Rice	2067	2095	-	-3.4878	6.6e-05	0.0328	AAGCTGCAGTGAGATGAGGGGATAGGGAA
311	ABI3VP1_tnt.VRN1_col_a_m1	VRN1	Rice	3924	3952	+	-16.403	6.61e-05	0.0162	TCCTCTCTGTTTTTTTTCTTCCCATTTTG
312	C2C2dof_tnt.OBP3_col_a_m1	OBP3	Rice	3929	3949	+	10.5606	6.65e-05	0.0395	TCTGTTTTTTTTCTTCCCATT
313	BBRBPC_tnt.BPC5_colamp_a_m1	BPC5	Rice	3928	3956	-	-3.53659	6.68e-05	0.0328	GTGACAAAATGGGAAGAAAAAAAACAGAG
314	BBRBPC_tnt.BPC1_col_a_m1	BPC1	Rice	2029	2052	-	-0.772727	6.81e-05	0.0368	AGGAGAGGGGGAAAATGAGAGGGG
315	C2C2dof_tnt.At4g38000_col_a_m1	At4g38000	Rice	4121	4148	-	10.1061	6.95e-05	0.0294	GGCCAATTTTTTTTTCATTGTTTTTTTT
316	REM_tnt.REM19_colamp_a_m1	REM19	Rice	2462	2482	-	7.74627	7.06e-05	0.0264	AAAGAAAAGAAAAAAGGAAGC
317	C2C2dof_tnt.At4g38000_col_a_m1	At4g38000	Rice	4606	4633	-	10.0758	7.06e-05	0.0294	ATTGTTATTATTATTTTAGTTTTTTTTT
318	ABI3VP1_tnt.VRN1_colamp_a_m1	VRN1	Rice	2467	2485	+	5.875	7.13e-05	0.0334	CTTTTTTCTTTTCTTTCTT
319	REM_tnt.REM19_col_a_m1	REM19	Rice	3928	3942	-	9.80597	7.22e-05	0.0366	AGAAAAAAAACAGAG
320	ABI3VP1_tnt.VRN1_col_a_m1	VRN1	Rice	2455	2483	+	-16.8955	7.27e-05	0.017	TGCTGTGGCTTCCTTTTTTCTTTTCTTTC
321	ABI3VP1_tnt.VRN1_col_a_m1	VRN1	Rice	4611	4639	-	-16.9552	7.36e-05	0.0171	AATTTTATTGTTATTATTATTTTAGTTTT
322	ABI3VP1_tnt.VRN1_colamp_a_m1	VRN1	Rice	4129	4147	-	5.72222	7.46e-05	0.0342	GCCAATTTTTTTTTCATTG
323	ABI3VP1_tnt.VRN1_colamp_a_m1	VRN1	Rice	3932	3950	+	5.70833	7.49e-05	0.0342	GTTTTTTTTCTTCCCATTT
324	REM_tnt.REM19_colamp_a_m1	REM19	Rice	4602	4622	+	7.56716	7.58e-05	0.0274	ATAAAAAAAAAAACTAAAATA
325	REM_tnt.REM19_col_a_m1	REM19	Rice	2151	2165	+	9.68657	7.62e-05	0.038	AAGGAAAAAAGAAGA
326	C2C2dof_tnt.At4g38000_col_a_m1	At4g38000	Rice	3141	3168	-	9.92424	7.64e-05	0.0316	TTACCCCCCATCTTACTGTTACTTTTGT
327	REM_tnt.REM19_col_a_m1	REM19	Rice	3620	3634	-	9.62687	7.82e-05	0.0384	TGAAAAAAAAAAGAG
328	REM_tnt.REM19_colamp_a_m1	REM19	Rice	4113	4133	+	7.47761	7.85e-05	0.0278	CTGTGGAAAAAAAAAACAATG
329	BBRBPC_tnt.BPC1_col_a_m1	BPC1	Rice	2458	2481	-	-1.25758	7.86e-05	0.0392	AAGAAAAGAAAAAAGGAAGCCACA
330	ABI3VP1_tnt.VRN1_colamp_a_m1	VRN1	Rice	1186	1204	+	5.52778	7.9e-05	0.0356	GTCTTTTCTTTTCTTTTCT
331	BBRBPC_tnt.BPC1_col_a_m1	BPC1	Rice	1098	1121	+	-1.33333	8.04e-05	0.0394	TTGAGAGAGATGAAGAGAGGATTT
332	BBRBPC_tnt.BPC1_col_a_m1	BPC1	Rice	1094	1117	+	-1.37879	8.15e-05	0.0394	ATTATTGAGAGAGATGAAGAGAGG
333	C2C2dof_tnt.OBP3_col_a_m1	OBP3	Rice	4256	4276	-	10.1818	8.16e-05	0.0455	TTTAGTTTTTTATTTAATATT
334	ABI3VP1_tnt.VRN1_col_a_m1	VRN1	Rice	3929	3957	+	-17.5821	8.29e-05	0.0185	TCTGTTTTTTTTCTTCCCATTTTGTCACT
335	REM_tnt.REM19_colamp_a_m1	REM19	Rice	3929	3949	-	7.31343	8.37e-05	0.0281	AATGGGAAGAAAAAAAACAGA
336	REM_tnt.REM19_col_a_m1	REM19	Rice	1530	1544	-	9.44776	8.46e-05	0.0402	AACAAAAAAATCCAA
337	ABI3VP1_tnt.VRN1_col_a_m1	VRN1	Rice	1179	1207	+	-17.7761	8.61e-05	0.0188	AGCTCAAGTCTTTTCTTTTCTTTTCTGAT
338	REM_tnt.REM19_col_a_m1	REM19	Rice	2466	2480	-	9.40299	8.63e-05	0.0402	AGAAAAGAAAAAAGG
339	ABI3VP1_tnt.VRN1_col_a_m1	VRN1	Rice	2478	2506	+	-17.8358	8.71e-05	0.0189	TCTTTCTTTTTTACATTCTATATTGTTAC
340	C2C2dof_tnt.At4g38000_col_a_m1	At4g38000	Rice	2557	2584	-	9.63636	8.85e-05	0.0342	ATTTCTAAATTTTATTCCCTTCCCTTTT
341	C2C2dof_tnt.At4g38000_col_a_m1	At4g38000	Rice	5111	5138	+	9.60606	8.98e-05	0.0345	AGTATAAGTTGTTTTAATTTTCTTTCTA
342	C2C2dof_tnt.OBP3_col_a_m1	OBP3	Rice	2959	2979	+	10	8.99e-05	0.048	TTTCCTTTACTACTTTTAAGA
343	ABI3VP1_tnt.VRN1_col_a_m1	VRN1	Rice	4616	4644	-	-18.0299	9.03e-05	0.0193	GTACTAATTTTATTGTTATTATTATTTTA
344	ABI3VP1_tnt.VRN1_col_a_m1	VRN1	Rice	1519	1547	+	-18.0448	9.06e-05	0.0193	AGCTCATCTGGTTGGATTTTTTTGTTGAT
345	ABI3VP1_tnt.VRN1_col_a_m1	VRN1	Rice	4258	4286	-	-18.1045	9.16e-05	0.0194	GCATCCTTAATTTAGTTTTTTATTTAATA
346	ABI3VP1_tnt.VRN1_colamp_a_m1	VRN1	Rice	4604	4622	-	4.98611	9.24e-05	0.0399	TATTTTAGTTTTTTTTTTT
347	ABI3VP1_tnt.VRN1_col_a_m1	VRN1	Rice	1180	1208	+	-18.194	9.32e-05	0.0195	GCTCAAGTCTTTTCTTTTCTTTTCTGATT
348	C2C2dof_tnt.At4g38000_col_a_m1	At4g38000	Rice	332	359	+	9.5303	9.33e-05	0.035	CTTGATGTTTGGTTCTTGCAGCTTTTTC
349	ABI3VP1_tnt.VRN1_colamp_a_m1	VRN1	Rice	2471	2489	+	4.94444	9.35e-05	0.0399	TTTCTTTTCTTTCTTTTTT
350	REM_tnt.REM19_col_a_m1	REM19	Rice	4123	4137	+	9.20896	9.37e-05	0.0428	AAAAAACAATGAAAA
351	ABI3VP1_tnt.VRN1_colamp_a_m1	VRN1	Rice	24	42	+	4.91667	9.43e-05	0.0399	AGTCTGTTTTTTCTCTGTT
352	ABI3VP1_tnt.VRN1_col_a_m1	VRN1	Rice	2147	2175	-	-18.2985	9.5e-05	0.0197	GTATCTGTGTTCTTCTTTTTTCCTTCTCC
353	BBRBPC_tnt.BPC1_col_a_m1	BPC1	Rice	3935	3958	-	-1.90909	9.53e-05	0.0427	GAGTGACAAAATGGGAAGAAAAAA
354	ABI3VP1_tnt.VRN1_col_a_m1	VRN1	Rice	5108	5136	+	-18.3284	9.56e-05	0.0197	CATAGTATAAGTTGTTTTAATTTTCTTTC
355	BBRBPC_tnt.BPC1_col_a_m1	BPC1	Rice	543	566	-	-1.92424	9.57e-05	0.0427	GCAATGTAAAGAGTGAGTGAAAAA
356	C2C2dof_tnt.OBP3_col_a_m1	OBP3	Rice	264	284	+	9.87879	9.58e-05	0.0499	CCTACTTTCTGATTCATTGTT
357	REM_tnt.REM19_col_a_m1	REM19	Rice	1703	1717	-	9.14925	9.6e-05	0.0436	GTAAAAAAAATGTAG
358	ABI3VP1_tnt.VRN1_col_a_m1	VRN1	Rice	2989	3017	+	-18.4179	9.72e-05	0.0198	AAGTACCTTTGCTGTAACTTTTTTTTTCA
359	C2C2dof_tnt.OBP3_col_a_m1	OBP3	Rice	2545	2565	-	9.84848	9.73e-05	0.0499	TTCCCTTTTCAATCATTTAGT
360	C2C2dof_tnt.OBP3_col_a_m1	OBP3	Rice	4404	4424	-	9.84848	9.73e-05	0.0499	GTTACTTTCTATGTTTCATAA
361	REM_tnt.REM19_colamp_a_m1	REM19	Rice	2146	2166	+	6.91045	9.79e-05	0.0306	AGGAGAAGGAAAAAAGAAGAA
362	Trihelix_tnt.AT3G58630_col_a_m1	AT3G58630	Barley	3179	3193	+	19	5.55e-08	0.000739	CCATCTCCGGCGAGG
363	Trihelix_tnt.AT5G05550_colamp_a_m1	AT5G05550	Barley	3180	3194	+	18.803	5.65e-08	0.000859	CATCTCCGGCGAGGT
364	C2C2dof_tnt.At4g38000_col_a_m1	At4g38000	Barley	1945	1972	+	19.8636	7.46e-08	0.000624	CTTTTCTCTCTTCTCTCTCTTCTTTTTG
365	Trihelix_tnt.AT3G58630_colamp_a_m1	AT3G58630	Barley	3179	3193	+	18.5303	9.8e-08	0.00131	CCATCTCCGGCGAGG
366	Trihelix_tnt.AT5G05550_col_a_m1	AT5G05550	Barley	3180	3194	+	17.697	2.14e-07	0.00297	CATCTCCGGCGAGGT
367	C2C2dof_tnt.AT1G69570_colamp_a_m1	AT1G69570	Barley	64	84	-	17.7879	2.29e-07	0.00745	AGCAAAAGAAAAGGAAAAGCA
368	C2C2dof_tnt.AT1G69570_col_a_m1	AT1G69570	Barley	3983	4009	+	18.2727	3.02e-07	0.00276	TTTTAACTTTTTATTAAATTGTTATTT
369	C2C2dof_tnt.AT1G69570_col_a_m1	AT1G69570	Barley	60	86	+	18.0909	3.51e-07	0.00281	TTAATGCTTTTCCTTTTCTTTTGCTAT
370	C2C2dof_tnt.At4g38000_col_a_m1	At4g38000	Barley	3968	3995	+	17.7879	4.5e-07	0.00125	AATATTTTCAGAATTTTTTAACTTTTTA
371	BBRBPC_tnt.BPC5_colamp_a_m1	BPC5	Barley	1939	1967	-	12.5976	4.61e-07	0.00172	AGAAGAGAGAGAAGAGAGAAAAGAGGGAC
372	Trihelix_tnt.At3g14180_col_m1	At3g14180	Barley	3181	3191	-	17.4848	5.41e-07	0.00602	TCGCCGGAGAT
373	ABI3VP1_tnt.VRN1_col_a_m1	VRN1	Barley	3710	3738	-	4.08955	5.82e-07	0.000908	TTTAAACTATTTTGATTTTTTTTTCATAT
374	ABI3VP1_tnt.VRN1_col_a_m1	VRN1	Barley	3711	3739	-	2.98507	7.86e-07	0.001	TTTTAAACTATTTTGATTTTTTTTTCATA
375	C2C2dof_tnt.AT5G66940_col_a_m1	AT5G66940	Barley	3973	4001	+	16.697	1.04e-06	0.00414	TTTCAGAATTTTTTAACTTTTTATTAAAT
376	ABI3VP1_tnt.VRN1_col_a_m1	VRN1	Barley	3991	4019	+	1.91045	1.05e-06	0.00116	TTTTATTAAATTGTTATTTTTTTTGCATG
377	C2C2dof_tnt.At4g38000_col_a_m1	At4g38000	Barley	3863	3890	+	16.5152	1.22e-06	0.00242	CTATTTTGATCGAAATTTTATCTTTTTT
378	BBRBPC_tnt.BPC5_col_a_m1	BPC5	Barley	1937	1966	-	-25.5132	1.51e-06	0.00747	GAAGAGAGAGAAGAGAGAAAAGAGGGACAT
379	C2C2dof_tnt.At4g38000_col_a_m1	At4g38000	Barley	2625	2652	-	16.2273	1.51e-06	0.00282	AAGATTTTTTTTCCGCCTTTCCTTTTTT
380	ABI3VP1_tnt.VRN1_col_a_m1	VRN1	Barley	1948	1976	+	0.432836	1.54e-06	0.00152	TTCTCTCTTCTCTCTCTTCTTTTTGTGTT
381	C2C2dof_tnt.AT1G69570_col_a_m1	AT1G69570	Barley	66	92	+	16.0152	1.76e-06	0.00852	CTTTTCCTTTTCTTTTGCTATTTCAAA
382	REM_tnt.REM19_col_a_m1	REM19	Barley	4002	4016	-	16.2836	1.81e-06	0.00774	GCAAAAAAAATAACA
383	BBRBPC_tnt.BPC5_colamp_a_m1	BPC5	Barley	1943	1971	-	8.7439	1.82e-06	0.00426	AAAAAGAAGAGAGAGAAGAGAGAAAAGAG
384	C2C2dof_tnt.At4g38000_col_a_m1	At4g38000	Barley	3986	4013	+	15.9242	1.89e-06	0.00333	TAACTTTTTATTAAATTGTTATTTTTTT
385	BBRBPC_tnt.BPC5_colamp_a_m1	BPC5	Barley	1948	1976	-	8.40244	2.04e-06	0.00461	AACACAAAAAGAAGAGAGAGAAGAGAGAA
386	REM_tnt.REM19_colamp_a_m1	REM19	Barley	3710	3730	+	15.2985	2.11e-06	0.00324	ATATGAAAAAAAAATCAAAAT
387	BBRBPC_tnt.BPC5_colamp_a_m1	BPC5	Barley	1957	1985	-	8.20732	2.18e-06	0.00476	GCAGATGGGAACACAAAAAGAAGAGAGAG
388	C2C2dof_tnt.AT5G66940_colamp_a_m1	AT5G66940	Barley	3981	4001	+	15.3333	2.69e-06	0.0403	TTTTTTAACTTTTTATTAAAT
389	C2C2dof_tnt.AT5G66940_col_a_m1	AT5G66940	Barley	1950	1978	+	15.4545	2.73e-06	0.00967	CTCTCTTCTCTCTCTTCTTTTTGTGTTCC
390	C2H2_tnt.TF3A_col_a_m1	TF3A	Barley	1642	1660	-	14.88	2.98e-06	0.0137	CCCCTCCCTTCACCCCCTC
391	C2C2dof_tnt.AT5G66940_col_a_m1	AT5G66940	Barley	56	84	+	15.3182	3.02e-06	0.0101	GTATTTAATGCTTTTCCTTTTCTTTTGCT
392	C2C2dof_tnt.OBP3_colamp_a_m1	OBP3	Barley	3977	3995	+	14.6061	3.36e-06	0.0253	AGAATTTTTTAACTTTTTA
393	C2C2dof_tnt.At4g38000_col_a_m1	At4g38000	Barley	3987	4014	+	14.7576	4.31e-06	0.00592	AACTTTTTATTAAATTGTTATTTTTTTT
394	C2C2dof_tnt.AT5G66940_col_a_m1	AT5G66940	Barley	2619	2647	-	14.7273	4.62e-06	0.0141	TTTTTTTCCGCCTTTCCTTTTTTGGGTAA
395	BBRBPC_tnt.BPC1_col_a_m1	BPC1	Barley	1942	1965	-	7.22727	4.83e-06	0.00901	AAGAGAGAGAAGAGAGAAAAGAGG
396	C2C2dof_tnt.AT5G66940_col_a_m1	AT5G66940	Barley	61	89	+	14.5	5.42e-06	0.0157	TAATGCTTTTCCTTTTCTTTTGCTATTTC
397	BBRBPC_tnt.BPC1_colamp_a_m1	BPC1	Barley	1951	1965	+	12.7727	5.59e-06	0.0164	TCTCTTCTCTCTCTT
398	BBRBPC_tnt.BPC5_colamp_a_m1	BPC5	Barley	1941	1969	-	5.14634	5.83e-06	0.00852	AAAGAAGAGAGAGAAGAGAGAAAAGAGGG
399	BBRBPC_tnt.BPC5_colamp_a_m1	BPC5	Barley	1946	1974	-	5.02439	6.05e-06	0.00852	CACAAAAAGAAGAGAGAGAAGAGAGAAAA
400	REM_tnt.REM19_col_a_m1	REM19	Barley	3712	3726	+	14.4776	6.16e-06	0.0103	ATGAAAAAAAAATCA
401	ABI3VP1_tnt.VRN1_col_a_m1	VRN1	Barley	59	87	+	-5.61194	6.7e-06	0.00402	TTTAATGCTTTTCCTTTTCTTTTGCTATT
402	C2C2dof_tnt.At4g38000_col_a_m1	At4g38000	Barley	3714	3741	-	14.0758	6.79e-06	0.00742	AATTTTAAACTATTTTGATTTTTTTTTC
403	REM_tnt.REM19_colamp_a_m1	REM19	Barley	3876	3896	-	12.9403	7.13e-06	0.00655	CTTTAAAAAAAAGATAAAATT
404	REM_tnt.REM19_colamp_a_m1	REM19	Barley	3711	3731	+	12.8657	7.39e-06	0.00661	TATGAAAAAAAAATCAAAATA
405	C2C2dof_tnt.OBP3_colamp_a_m1	OBP3	Barley	1954	1972	+	13.7727	7.95e-06	0.0299	CTTCTCTCTCTTCTTTTTG
406	C2C2dof_tnt.AT5G66940_colamp_a_m1	AT5G66940	Barley	58	78	+	14.0758	8.04e-06	0.0475	ATTTAATGCTTTTCCTTTTCT
407	C2C2dof_tnt.OBP3_colamp_a_m1	OBP3	Barley	60	78	+	13.7576	8.07e-06	0.0299	TTAATGCTTTTCCTTTTCT
408	ND_tnt.FRS9_col_a_m1	FRS9	Barley	1949	1969	+	9.34848	8.12e-06	0.013	TCTCTCTTCTCTCTCTTCTTT
409	ABI3VP1_tnt.VRN1_col_a_m1	VRN1	Barley	3987	4015	+	-6.68657	8.57e-06	0.00477	AACTTTTTATTAAATTGTTATTTTTTTTG
410	C2C2dof_tnt.AT5G66940_colamp_a_m1	AT5G66940	Barley	64	84	+	13.9697	8.76e-06	0.0475	TGCTTTTCCTTTTCTTTTGCT
411	C2C2dof_tnt.OBP3_col_a_m1	OBP3	Barley	3985	4005	+	13.8333	8.81e-06	0.0144	TTAACTTTTTATTAAATTGTT
412	REM_tnt.REM19_colamp_a_m1	REM19	Barley	66	86	-	12.4478	9.05e-06	0.00754	ATAGCAAAAGAAAAGGAAAAG
413	REM_tnt.REM19_colamp_a_m1	REM19	Barley	4000	4020	-	12.3731	9.38e-06	0.00754	ACATGCAAAAAAAATAACAAT
414	BBRBPC_tnt.BPC5_colamp_a_m1	BPC5	Barley	1945	1973	-	3.53659	9.51e-06	0.011	ACAAAAAGAAGAGAGAGAAGAGAGAAAAG
415	BBRBPC_tnt.BPC5_colamp_a_m1	BPC5	Barley	1937	1965	-	3.45122	9.75e-06	0.011	AAGAGAGAGAAGAGAGAAAAGAGGGACAT
416	ABI3VP1_tnt.VRN1_col_a_m1	VRN1	Barley	55	83	+	-7.41791	1.01e-05	0.00521	GGTATTTAATGCTTTTCCTTTTCTTTTGC
417	C2C2dof_tnt.OBP3_col_a_m1	OBP3	Barley	62	82	+	13.5758	1.05e-05	0.0159	AATGCTTTTCCTTTTCTTTTG
418	BBRBPC_tnt.BPC5_col_a_m1	BPC5	Barley	1939	1968	-	-36.3553	1.13e-05	0.0174	AAGAAGAGAGAGAAGAGAGAAAAGAGGGAC
419	ABI3VP1_tnt.VRN1_col_a_m1	VRN1	Barley	3867	3895	+	-8.01493	1.16e-05	0.00542	TTTGATCGAAATTTTATCTTTTTTTTAAA
420	C2C2dof_tnt.OBP3_colamp_a_m1	OBP3	Barley	2625	2643	-	13.3182	1.23e-05	0.0362	TTTCCGCCTTTCCTTTTTT
421	C2C2dof_tnt.AT1G69570_col_a_m1	AT1G69570	Barley	1946	1972	+	13	1.32e-05	0.0325	TTTTCTCTCTTCTCTCTCTTCTTTTTG
422	C2C2dof_tnt.OBP3_colamp_a_m1	OBP3	Barley	3872	3890	+	13.197	1.37e-05	0.0373	TCGAAATTTTATCTTTTTT
423	C2C2dof_tnt.OBP3_colamp_a_m1	OBP3	Barley	65	83	+	13.1818	1.39e-05	0.0373	GCTTTTCCTTTTCTTTTGC
424	REM_tnt.REM19_colamp_a_m1	REM19	Barley	3998	4018	-	11.4925	1.42e-05	0.00903	ATGCAAAAAAAATAACAATTT
425	BBRBPC_tnt.BPC1_col_a_m1	BPC1	Barley	1940	1963	-	3.90909	1.54e-05	0.0156	GAGAGAGAAGAGAGAAAAGAGGGA
426	REM_tnt.REM19_colamp_a_m1	REM19	Barley	3707	3727	+	11.2985	1.55e-05	0.00978	TTCATATGAAAAAAAAATCAA
427	C2C2dof_tnt.AT1G69570_col_a_m1	AT1G69570	Barley	65	91	+	12.7121	1.57e-05	0.0333	GCTTTTCCTTTTCTTTTGCTATTTCAA
428	ND_tnt.FRS9_col_a_m1	FRS9	Barley	1886	1906	-	7.42424	1.66e-05	0.0197	TTCTGTAAATCTCTCCATCTT
429	C2C2dof_tnt.At4g38000_col_a_m1	At4g38000	Barley	3989	4016	+	12.6061	1.71e-05	0.0144	CTTTTTATTAAATTGTTATTTTTTTTGC
430	REM_tnt.REM19_col_a_m1	REM19	Barley	3715	3729	+	12.7313	1.71e-05	0.0166	AAAAAAAAATCAAAA
431	BBRBPC_tnt.BPC1_col_a_m1	BPC1	Barley	1944	1967	-	3.57576	1.72e-05	0.016	AGAAGAGAGAGAAGAGAGAAAAGA
432	ABI3VP1_tnt.VRN1_colamp_a_m1	VRN1	Barley	3787	3805	-	10.1944	1.74e-05	0.0183	TTGAGTTTTTTTTCCTGAA
433	ABI3VP1_tnt.VRN1_col_a_m1	VRN1	Barley	3868	3896	+	-9.92537	1.76e-05	0.00684	TTGATCGAAATTTTATCTTTTTTTTAAAG
434	REM_tnt.REM19_col_a_m1	REM19	Barley	4001	4015	-	12.6866	1.76e-05	0.0166	CAAAAAAAATAACAA
435	C2C2dof_tnt.At4g38000_col_a_m1	At4g38000	Barley	1946	1973	+	12.5303	1.79e-05	0.0145	TTTTCTCTCTTCTCTCTCTTCTTTTTGT
436	ABI3VP1_tnt.VRN1_colamp_a_m1	VRN1	Barley	3710	3728	-	10.1111	1.8e-05	0.0183	TTTGATTTTTTTTTCATAT
437	C2C2dof_tnt.OBP3_col_a_m1	OBP3	Barley	68	88	+	12.7424	1.82e-05	0.0211	TTTCCTTTTCTTTTGCTATTT
438	C2C2dof_tnt.OBP3_col_a_m1	OBP3	Barley	4207	4227	+	12.7121	1.86e-05	0.0211	TTTGCTTTCTTATTTCACGTT
439	BBRBPC_tnt.BPC1_colamp_a_m1	BPC1	Barley	1953	1967	+	9.87879	1.86e-05	0.0338	TCTTCTCTCTCTTCT
440	BBRBPC_tnt.BPC1_col_a_m1	BPC1	Barley	1886	1909	+	3.25758	1.91e-05	0.0164	AAGATGGAGAGATTTACAGAAGTA
441	REM_tnt.REM19_col_a_m1	REM19	Barley	3714	3728	+	12.5224	1.91e-05	0.0174	GAAAAAAAAATCAAA
442	C2C2dof_tnt.At4g38000_col_a_m1	At4g38000	Barley	3713	3740	-	12.4091	1.92e-05	0.0151	ATTTTAAACTATTTTGATTTTTTTTTCA
443	C2C2dof_tnt.AT5G66940_col_a_m1	AT5G66940	Barley	2625	2653	-	12.4545	2.04e-05	0.035	GAAGATTTTTTTTCCGCCTTTCCTTTTTT
444	REM_tnt.REM19_colamp_a_m1	REM19	Barley	67	87	-	10.597	2.13e-05	0.012	AATAGCAAAAGAAAAGGAAAA
445	C2C2dof_tnt.AT5G66940_col_a_m1	AT5G66940	Barley	1871	1899	-	12.3788	2.14e-05	0.035	AATCTCTCCATCTTTGCTTTTACTATATC
446	BBRBPC_tnt.BPC1_colamp_a_m1	BPC1	Barley	1942	1956	+	9.4697	2.19e-05	0.0345	CCTCTTTTCTCTCTT
447	REM_tnt.REM19_col_a_m1	REM19	Barley	4004	4018	-	12.2537	2.2e-05	0.019	ATGCAAAAAAAATAA
448	ABI3VP1_tnt.VRN1_colamp_a_m1	VRN1	Barley	2634	2652	-	9.54167	2.2e-05	0.0201	AAGATTTTTTTTCCGCCTT
449	BBRBPC_tnt.BPC5_col_a_m1	BPC5	Barley	1941	1970	-	-40.2763	2.21e-05	0.0263	AAAAGAAGAGAGAGAAGAGAGAAAAGAGGG
450	C2C2dof_tnt.At4g38000_col_a_m1	At4g38000	Barley	56	83	+	12.1667	2.22e-05	0.0161	GTATTTAATGCTTTTCCTTTTCTTTTGC
451	BBRBPC_tnt.BPC1_colamp_a_m1	BPC1	Barley	1955	1969	+	9.40909	2.25e-05	0.0345	TTCTCTCTCTTCTTT
452	C2C2dof_tnt.At4g38000_col_a_m1	At4g38000	Barley	3988	4015	+	12.0455	2.38e-05	0.0161	ACTTTTTATTAAATTGTTATTTTTTTTG
453	ABI3VP1_tnt.VRN1_colamp_a_m1	VRN1	Barley	3709	3727	-	9.25	2.43e-05	0.0201	TTGATTTTTTTTTCATATG
454	BBRBPC_tnt.BPC1_colamp_a_m1	BPC1	Barley	4426	4440	-	9.15152	2.46e-05	0.0353	TAGTTTCTCTGTCTC
455	ABI3VP1_tnt.VRN1_colamp_a_m1	VRN1	Barley	4003	4021	+	9.08333	2.57e-05	0.0207	GTTATTTTTTTTGCATGTA
456	ND_tnt.FRS9_col_a_m1	FRS9	Barley	1945	1965	+	6.19697	2.57e-05	0.0253	CTTTTCTCTCTTCTCTCTCTT
457	ABI3VP1_tnt.VRN1_col_a_m1	VRN1	Barley	3972	4000	+	-11.791	2.61e-05	0.00893	TTTTCAGAATTTTTTAACTTTTTATTAAA
458	C2H2_tnt.TF3A_col_a_m1	TF3A	Barley	4472	4490	+	11.072	2.78e-05	0.038	CTCCCTCACCCCCTTCAAC
459	C2C2dof_tnt.At4g38000_col_a_m1	At4g38000	Barley	1943	1970	+	11.7727	2.79e-05	0.017	CTCTTTTCTCTCTTCTCTCTCTTCTTTT
460	ABI3VP1_tnt.VRN1_col_a_m1	VRN1	Barley	3715	3743	-	-12.1343	2.8e-05	0.00929	ATAATTTTAAACTATTTTGATTTTTTTTT
461	C2C2dof_tnt.At4g38000_col_a_m1	At4g38000	Barley	3717	3744	-	11.7424	2.84e-05	0.017	AATAATTTTAAACTATTTTGATTTTTTT
462	C2C2dof_tnt.AT1G69570_col_a_m1	AT1G69570	Barley	1939	1965	+	11.6818	2.85e-05	0.0434	GTCCCTCTTTTCTCTCTTCTCTCTCTT
463	ABI3VP1_tnt.VRN1_col_a_m1	VRN1	Barley	1950	1978	+	-12.3134	2.91e-05	0.00932	CTCTCTTCTCTCTCTTCTTTTTGTGTTCC
464	ABI3VP1_tnt.VRN1_col_a_m1	VRN1	Barley	1946	1974	+	-12.3284	2.92e-05	0.00932	TTTTCTCTCTTCTCTCTCTTCTTTTTGTG
465	BBRBPC_tnt.BPC5_colamp_a_m1	BPC5	Barley	1955	1983	-	-0.414634	2.94e-05	0.0209	AGATGGGAACACAAAAAGAAGAGAGAGAA
466	ABI3VP1_tnt.VRN1_colamp_a_m1	VRN1	Barley	3788	3806	-	8.56944	3.06e-05	0.0226	GTTGAGTTTTTTTTCCTGA
467	BBRBPC_tnt.BPC1_colamp_a_m1	BPC1	Barley	1944	1958	+	8.59091	3.06e-05	0.0395	TCTTTTCTCTCTTCT
468	C2H2_tnt.TF3A_col_a_m1	TF3A	Barley	1639	1657	-	10.872	3.09e-05	0.0389	CTCCCTTCACCCCCTCCCT
469	ABI3VP1_tnt.VRN1_col_a_m1	VRN1	Barley	3992	4020	+	-12.806	3.22e-05	0.0101	TTTATTAAATTGTTATTTTTTTTGCATGT
470	ABI3VP1_tnt.VRN1_col_a_m1	VRN1	Barley	2620	2648	-	-12.9403	3.31e-05	0.0103	TTTTTTTTCCGCCTTTCCTTTTTTGGGTA
471	BBRBPC_tnt.BPC5_col_a_m1	BPC5	Barley	1891	1920	+	-42.6184	3.34e-05	0.0356	GGAGAGATTTACAGAAGTACGGACAAACAC
472	REM_tnt.REM19_col_a_m1	REM19	Barley	4319	4333	+	11.4328	3.35e-05	0.0252	GTGAAACAAAAATCA
473	C2C2dof_tnt.OBP3_col_a_m1	OBP3	Barley	1948	1968	+	11.7273	3.42e-05	0.0298	TTCTCTCTTCTCTCTCTTCTT
474	C2H2_tnt.TF3A_col_a_m1	TF3A	Barley	4235	4253	+	10.624	3.54e-05	0.0389	TCTCCTCCTCCCACCTATC
475	REM_tnt.REM19_colamp_a_m1	REM19	Barley	4003	4023	-	9.40299	3.57e-05	0.0174	CATACATGCAAAAAAAATAAC
476	REM_tnt.REM19_col_a_m1	REM19	Barley	3574	3588	-	11.2239	3.72e-05	0.0256	CACAAACACAAGAAA
477	C2H2_tnt.TF3A_col_a_m1	TF3A	Barley	3369	3387	-	10.512	3.75e-05	0.0389	CTTCACCTTGATCATCCAC
478	ND_tnt.FRS9_col_a_m1	FRS9	Barley	1940	1960	+	5.04545	3.82e-05	0.0344	TCCCTCTTTTCTCTCTTCTCT
479	BBRBPC_tnt.BPC5_col_a_m1	BPC5	Barley	1893	1922	+	-43.4605	3.89e-05	0.0356	AGAGATTTACAGAAGTACGGACAAACACTT
480	BBRBPC_tnt.BPC5_col_a_m1	BPC5	Barley	1877	1906	+	-43.5789	3.97e-05	0.0356	GTAAAAGCAAAGATGGAGAGATTTACAGAA
481	BBRBPC_tnt.BPC5_colamp_a_m1	BPC5	Barley	1951	1979	-	-1.53659	3.97e-05	0.0257	GGGAACACAAAAAGAAGAGAGAGAAGAGA
482	ABI3VP1_tnt.VRN1_col_a_m1	VRN1	Barley	3989	4017	+	-13.9552	4.07e-05	0.0117	CTTTTTATTAAATTGTTATTTTTTTTGCA
483	C2C2dof_tnt.AT5G66940_col_a_m1	AT5G66940	Barley	3868	3896	+	11.2121	4.2e-05	0.0454	TTGATCGAAATTTTATCTTTTTTTTAAAG
484	C2C2dof_tnt.At4g38000_col_a_m1	At4g38000	Barley	3715	3742	-	11.0303	4.24e-05	0.0222	TAATTTTAAACTATTTTGATTTTTTTTT
485	ND_tnt.FRS9_col_a_m1	FRS9	Barley	1947	1967	+	4.72727	4.25e-05	0.037	TTTCTCTCTTCTCTCTCTTCT
486	BBRBPC_tnt.BPC1_col_a_m1	BPC1	Barley	70	93	-	0.69697	4.34e-05	0.0275	GTTTGAAATAGCAAAAGAAAAGGA
487	C2H2_tnt.TF3A_col_a_m1	TF3A	Barley	3272	3290	+	10.152	4.54e-05	0.0399	ATCCTTTCACCTCCTCCAT
488	REM_tnt.REM19_colamp_a_m1	REM19	Barley	3907	3927	-	8.79104	4.62e-05	0.0201	AATTCCACAAAAAAGAATTAC
489	C2C2dof_tnt.OBP3_col_a_m1	OBP3	Barley	1941	1961	+	11.0909	4.95e-05	0.0365	CCCTCTTTTCTCTCTTCTCTC
490	C2C2dof_tnt.OBP3_col_a_m1	OBP3	Barley	1962	1982	+	11.0909	4.95e-05	0.0365	TCTTCTTTTTGTGTTCCCATC
491	C2C2dof_tnt.At4g38000_col_a_m1	At4g38000	Barley	2624	2651	-	10.7121	5.04e-05	0.0249	AGATTTTTTTTCCGCCTTTCCTTTTTTG
492	REM_tnt.REM19_col_a_m1	REM19	Barley	2867	2881	+	10.5672	5.08e-05	0.0304	GAAAAAAAATTGAAA
493	ABI3VP1_tnt.VRN1_col_a_m1	VRN1	Barley	3986	4014	+	-15.1045	5.12e-05	0.0138	TAACTTTTTATTAAATTGTTATTTTTTTT
494	ABI3VP1_tnt.VRN1_col_a_m1	VRN1	Barley	3895	3923	+	-15.403	5.43e-05	0.0144	AGACGTCAATGTGTAATTCTTTTTTGTGG
495	ABI3VP1_tnt.VRN1_col_a_m1	VRN1	Barley	3709	3737	-	-15.6119	5.66e-05	0.0148	TTAAACTATTTTGATTTTTTTTTCATATG
496	ABI3VP1_tnt.VRN1_col_a_m1	VRN1	Barley	60	88	+	-15.6269	5.68e-05	0.0148	TTAATGCTTTTCCTTTTCTTTTGCTATTT
497	ABI3VP1_tnt.VRN1_col_a_m1	VRN1	Barley	1945	1973	+	-15.6418	5.7e-05	0.0148	CTTTTCTCTCTTCTCTCTCTTCTTTTTGT
498	REM_tnt.REM19_col_a_m1	REM19	Barley	2637	2651	+	10.3134	5.72e-05	0.0319	GCGGAAAAAAAATCT
499	REM_tnt.REM19_col_a_m1	REM19	Barley	1962	1976	-	10.2239	5.97e-05	0.0324	AACACAAAAAGAAGA
500	C2C2dof_tnt.At4g38000_col_a_m1	At4g38000	Barley	1944	1971	+	10.3636	6.07e-05	0.0279	TCTTTTCTCTCTTCTCTCTCTTCTTTTT
501	REM_tnt.REM19_colamp_a_m1	REM19	Barley	3874	3894	-	8.1194	6.08e-05	0.0238	TTAAAAAAAAGATAAAATTTC
502	C2C2dof_tnt.OBP3_col_a_m1	OBP3	Barley	3874	3894	+	10.697	6.17e-05	0.0388	GAAATTTTATCTTTTTTTTAA
503	ABI3VP1_tnt.VRN1_col_a_m1	VRN1	Barley	3707	3735	-	-16.0597	6.18e-05	0.0156	AAACTATTTTGATTTTTTTTTCATATGAA
504	BBRBPC_tnt.BPC5_colamp_a_m1	BPC5	Barley	1949	1977	-	-3.23171	6.18e-05	0.0319	GAACACAAAAAGAAGAGAGAGAAGAGAGA
505	ABI3VP1_tnt.VRN1_col_a_m1	VRN1	Barley	3713	3741	-	-16.0746	6.2e-05	0.0156	AATTTTAAACTATTTTGATTTTTTTTTCA
506	ABI3VP1_tnt.VRN1_colamp_a_m1	VRN1	Barley	4002	4020	+	6.33333	6.21e-05	0.0313	TGTTATTTTTTTTGCATGT
507	ABI3VP1_tnt.VRN1_col_a_m1	VRN1	Barley	3985	4013	+	-16.4776	6.71e-05	0.0164	TTAACTTTTTATTAAATTGTTATTTTTTT
508	BBRBPC_tnt.BPC1_col_a_m1	BPC1	Barley	1948	1971	-	-0.80303	6.87e-05	0.0369	AAAAAGAAGAGAGAGAAGAGAGAA
509	ABI3VP1_tnt.VRN1_col_a_m1	VRN1	Barley	2624	2652	-	-16.7164	7.02e-05	0.0169	AAGATTTTTTTTCCGCCTTTCCTTTTTTG
510	C2C2dof_tnt.At4g38000_col_a_m1	At4g38000	Barley	1877	1904	-	10.0758	7.06e-05	0.0294	CTGTAAATCTCTCCATCTTTGCTTTTAC
511	ABI3VP1_tnt.VRN1_col_a_m1	VRN1	Barley	3897	3925	+	-16.8806	7.25e-05	0.017	ACGTCAATGTGTAATTCTTTTTTGTGGAA
512	BBRBPC_tnt.BPC1_col_a_m1	BPC1	Barley	1938	1961	-	-1.09091	7.48e-05	0.0382	GAGAGAAGAGAGAAAAGAGGGACA
513	REM_tnt.REM19_col_a_m1	REM19	Barley	4189	4203	-	9.67164	7.67e-05	0.038	AACAAACACACATAA
514	BBRBPC_tnt.BPC1_col_a_m1	BPC1	Barley	68	91	-	-1.21212	7.76e-05	0.0392	TTGAAATAGCAAAAGAAAAGGAAA
515	BBRBPC_tnt.BPC1_col_a_m1	BPC1	Barley	1946	1969	-	-1.22727	7.79e-05	0.0392	AAAGAAGAGAGAGAAGAGAGAAAA
516	C2C2dof_tnt.At4g38000_col_a_m1	At4g38000	Barley	1940	1967	+	9.86364	7.88e-05	0.0324	TCCCTCTTTTCTCTCTTCTCTCTCTTCT
517	REM_tnt.REM19_colamp_a_m1	REM19	Barley	4563	4583	-	7.37313	8.18e-05	0.0281	ATACAAAGCAAAATAAGACTA
518	REM_tnt.REM19_colamp_a_m1	REM19	Barley	3906	3926	-	7.32836	8.32e-05	0.0281	ATTCCACAAAAAAGAATTACA
519	REM_tnt.REM19_col_a_m1	REM19	Barley	1964	1978	-	9.43284	8.51e-05	0.0402	GGAACACAAAAAGAA
520	ABI3VP1_tnt.VRN1_colamp_a_m1	VRN1	Barley	1961	1979	+	5.13889	8.84e-05	0.0393	CTCTTCTTTTTGTGTTCCC
521	ABI3VP1_tnt.VRN1_col_a_m1	VRN1	Barley	3973	4001	+	-18.0746	9.11e-05	0.0193	TTTCAGAATTTTTTAACTTTTTATTAAAT
522	C2C2dof_tnt.At4g38000_col_a_m1	At4g38000	Barley	3866	3893	+	9.51515	9.41e-05	0.035	TTTTGATCGAAATTTTATCTTTTTTTTA
523	ABI3VP1_tnt.VRN1_col_a_m1	VRN1	Barley	4191	4219	+	-18.2687	9.45e-05	0.0197	ATGTGTGTTTGTTGGCTTTGCTTTCTTAT
524	C2C2dof_tnt.At4g38000_col_a_m1	At4g38000	Barley	1942	1969	+	9.5	9.48e-05	0.0351	CCTCTTTTCTCTCTTCTCTCTCTTCTTT
525	REM_tnt.REM19_colamp_a_m1	REM19	Barley	3908	3928	-	6.98507	9.51e-05	0.0305	AAATTCCACAAAAAAGAATTA
526	C2C2dof_tnt.At4g38000_col_a_m1	At4g38000	Barley	3471	3498	+	9.43939	9.77e-05	0.0358	TTTCTTGCTCGCTTATCATTCCTTTTGT
527	ABI3VP1_tnt.VRN1_col_a_m1	VRN1	Barley	3988	4016	+	-18.5373	9.94e-05	0.0202	ACTTTTTATTAAATTGTTATTTTTTTTGC
528	REM_tnt.REM19_colamp_a_m1	REM19	Barley	2863	2883	+	6.86567	9.96e-05	0.0308	TTTCGAAAAAAAATTGAAATG
529	C2C2dof_tnt.AT1G69570_col_a_m1	AT1G69570	Brachypodium	2782	2808	-	22.9242	3.37e-09	0.000216	TTTTTTCTTTTCTTTTTTCCCTTTCTT
530	C2C2dof_tnt.OBP3_col_a_m1	OBP3	Brachypodium	2781	2801	-	21.3182	7.48e-09	0.000476	TTTTCTTTTTTCCCTTTCTTT
531	C2C2dof_tnt.At4g38000_col_a_m1	At4g38000	Brachypodium	1184	1211	+	21.8182	1.1e-08	0.000183	TTTATTTATATTCTCTTTTTTCTTTTCT
532	C2C2dof_tnt.AT5G66940_col_a_m1	AT5G66940	Brachypodium	1182	1210	+	19.9091	5.53e-08	0.000883	CTTTTATTTATATTCTCTTTTTTCTTTTC
533	Trihelix_tnt.AT3G58630_col_a_m1	AT3G58630	Brachypodium	3372	3386	+	19	5.55e-08	0.000739	CCATCTCCGGCGAGG
534	Trihelix_tnt.AT5G05550_colamp_a_m1	AT5G05550	Brachypodium	3373	3387	+	18.803	5.65e-08	0.000859	CATCTCCGGCGAGGT
535	C2C2dof_tnt.At4g38000_col_a_m1	At4g38000	Brachypodium	2782	2809	-	20.0303	6.39e-08	0.000624	ATTTTTTCTTTTCTTTTTTCCCTTTCTT
536	C2C2dof_tnt.OBP3_colamp_a_m1	OBP3	Brachypodium	2791	2809	-	17.5	7.86e-08	0.00255	ATTTTTTCTTTTCTTTTTT
537	C2C2dof_tnt.AT5G66940_col_a_m1	AT5G66940	Brachypodium	2785	2813	-	19.4242	9.01e-08	0.00115	TAGCATTTTTTCTTTTCTTTTTTCCCTTT
538	Trihelix_tnt.AT3G58630_colamp_a_m1	AT3G58630	Brachypodium	3372	3386	+	18.5303	9.8e-08	0.00131	CCATCTCCGGCGAGG
539	C2C2dof_tnt.At4g38000_col_a_m1	At4g38000	Brachypodium	2783	2810	-	19.303	1.24e-07	0.000714	CATTTTTTCTTTTCTTTTTTCCCTTTCT
540	C2C2dof_tnt.OBP3_col_a_m1	OBP3	Brachypodium	2786	2806	-	18.8182	1.31e-07	0.00138	TTTTCTTTTCTTTTTTCCCTT
541	Trihelix_tnt.AT5G05550_col_a_m1	AT5G05550	Brachypodium	3373	3387	+	17.697	2.14e-07	0.00297	CATCTCCGGCGAGGT
542	ABI3VP1_tnt.VRN1_colamp_a_m1	VRN1	Brachypodium	1340	1358	+	19.2639	2.39e-07	0.00171	AAGATTTTTTTTTGTTTCG
543	BBRBPC_tnt.BPC5_colamp_a_m1	BPC5	Brachypodium	2774	2802	+	14.2073	2.49e-07	0.00125	CGGCAAGAAAGAAAGGGAAAAAAGAAAAG
544	C2C2dof_tnt.AT5G66940_col_a_m1	AT5G66940	Brachypodium	2777	2805	-	18.3333	2.54e-07	0.00232	TTTCTTTTCTTTTTTCCCTTTCTTTCTTG
545	BBRBPC_tnt.BPC5_colamp_a_m1	BPC5	Brachypodium	2778	2806	+	13	3.96e-07	0.00157	AAGAAAGAAAGGGAAAAAAGAAAAGAAAA
546	C2C2dof_tnt.At4g38000_col_a_m1	At4g38000	Brachypodium	2778	2805	-	17.7273	4.73e-07	0.00125	TTTCTTTTCTTTTTTCCCTTTCTTTCTT
547	C2C2dof_tnt.AT1G69570_col_a_m1	AT1G69570	Brachypodium	2777	2803	-	17.5758	5.34e-07	0.0038	TCTTTTCTTTTTTCCCTTTCTTTCTTG
548	Trihelix_tnt.At3g14180_col_m1	At3g14180	Brachypodium	3374	3384	-	17.4848	5.41e-07	0.00602	TCGCCGGAGAT
549	ABI3VP1_tnt.VRN1_col_a_m1	VRN1	Brachypodium	2785	2813	-	3.52239	6.8e-07	0.000963	TAGCATTTTTTCTTTTCTTTTTTCCCTTT
550	ABI3VP1_tnt.VRN1_col_a_m1	VRN1	Brachypodium	1180	1208	+	3.41791	6.99e-07	0.000969	GTCTTTTATTTATATTCTCTTTTTTCTTT
551	C2C2dof_tnt.AT1G69570_col_a_m1	AT1G69570	Brachypodium	1192	1218	+	17.1818	7.29e-07	0.00467	TATTCTCTTTTTTCTTTTCTCCAAAGT
552	C2C2dof_tnt.AT5G66940_colamp_a_m1	AT5G66940	Brachypodium	2785	2805	-	16.3939	9.61e-07	0.0313	TTTCTTTTCTTTTTTCCCTTT
553	C2C2dof_tnt.AT5G66940_col_a_m1	AT5G66940	Brachypodium	2776	2804	-	16.7879	9.64e-07	0.0041	TTCTTTTCTTTTTTCCCTTTCTTTCTTGC
554	C2C2dof_tnt.OBP3_col_a_m1	OBP3	Brachypodium	1194	1214	+	16.6364	1.01e-06	0.00494	TTCTCTTTTTTCTTTTCTCCA
555	C2C2dof_tnt.AT5G66940_col_a_m1	AT5G66940	Brachypodium	1189	1217	+	16.5455	1.17e-06	0.00441	TTATATTCTCTTTTTTCTTTTCTCCAAAG
556	ABI3VP1_tnt.VRN1_col_a_m1	VRN1	Brachypodium	1181	1209	+	0.970149	1.34e-06	0.00138	TCTTTTATTTATATTCTCTTTTTTCTTTT
557	BBRBPC_tnt.BPC1_col_a_m1	BPC1	Brachypodium	2782	2805	+	10.5303	1.39e-06	0.00383	AAGAAAGGGAAAAAAGAAAAGAAA
558	ABI3VP1_tnt.VRN1_col_a_m1	VRN1	Brachypodium	1185	1213	+	0.223881	1.62e-06	0.00158	TTATTTATATTCTCTTTTTTCTTTTCTCC
559	ABI3VP1_tnt.VRN1_col_a_m1	VRN1	Brachypodium	2789	2817	-	-0.850746	2.13e-06	0.00195	GTGGTAGCATTTTTTCTTTTCTTTTTTCC
560	REM_tnt.REM19_col_a_m1	REM19	Brachypodium	1341	1355	-	16	2.25e-06	0.00774	AACAAAAAAAAATCT
561	ABI3VP1_tnt.VRN1_col_a_m1	VRN1	Brachypodium	2777	2805	-	-1.55224	2.54e-06	0.00219	TTTCTTTTCTTTTTTCCCTTTCTTTCTTG
562	C2C2dof_tnt.At4g38000_col_a_m1	At4g38000	Brachypodium	2784	2811	-	15.5	2.57e-06	0.00417	GCATTTTTTCTTTTCTTTTTTCCCTTTC
563	ABI3VP1_tnt.VRN1_col_a_m1	VRN1	Brachypodium	2786	2814	-	-1.62687	2.58e-06	0.0022	GTAGCATTTTTTCTTTTCTTTTTTCCCTT
564	C2C2dof_tnt.At4g38000_col_a_m1	At4g38000	Brachypodium	1177	1204	+	15.4091	2.74e-06	0.00423	AAAGTCTTTTATTTATATTCTCTTTTTT
565	ABI3VP1_tnt.VRN1_col_a_m1	VRN1	Brachypodium	2780	2808	-	-2	2.83e-06	0.00232	TTTTTTCTTTTCTTTTTTCCCTTTCTTTC
566	REM_tnt.REM19_colamp_a_m1	REM19	Brachypodium	4287	4307	-	14.7015	2.91e-06	0.00407	ACCATACAAAAAAAACAACAA
567	C2C2dof_tnt.AT5G66940_colamp_a_m1	AT5G66940	Brachypodium	1190	1210	+	15.2424	2.93e-06	0.0403	TATATTCTCTTTTTTCTTTTC
568	C2C2dof_tnt.AT1G69570_colamp_a_m1	AT1G69570	Brachypodium	2784	2804	+	15.197	2.97e-06	0.0323	GAAAGGGAAAAAAGAAAAGAA
569	REM_tnt.REM19_colamp_a_m1	REM19	Brachypodium	2790	2810	+	14.6418	3e-06	0.00411	GAAAAAAGAAAAGAAAAAATG
570	REM_tnt.REM19_colamp_a_m1	REM19	Brachypodium	2788	2808	+	14.403	3.4e-06	0.00438	GGGAAAAAAGAAAAGAAAAAA
571	ABI3VP1_tnt.VRN1_col_a_m1	VRN1	Brachypodium	1182	1210	+	-2.76119	3.41e-06	0.00266	CTTTTATTTATATTCTCTTTTTTCTTTTC
572	ABI3VP1_tnt.VRN1_colamp_a_m1	VRN1	Brachypodium	4286	4304	+	14.0278	3.81e-06	0.0105	CTTGTTGTTTTTTTTGTAT
573	REM_tnt.REM19_colamp_a_m1	REM19	Brachypodium	2787	2807	+	14.1045	3.97e-06	0.00483	AGGGAAAAAAGAAAAGAAAAA
574	ND_tnt.FRS9_col_a_m1	FRS9	Brachypodium	2778	2798	-	11.0303	4.18e-06	0.00786	TCTTTTTTCCCTTTCTTTCTT
575	C2C2dof_tnt.OBP3_colamp_a_m1	OBP3	Brachypodium	1186	1204	+	14.3939	4.22e-06	0.0253	TATTTATATTCTCTTTTTT
576	REM_tnt.REM19_colamp_a_m1	REM19	Brachypodium	1192	1212	-	13.9851	4.22e-06	0.00489	GAGAAAAGAAAAAAGAGAATA
577	REM_tnt.REM19_colamp_a_m1	REM19	Brachypodium	2720	2740	-	13.9851	4.22e-06	0.00489	TTTTCAAAAATAAATAAATAA
578	REM_tnt.REM19_col_a_m1	REM19	Brachypodium	1343	1357	-	15.0448	4.23e-06	0.0089	GAAACAAAAAAAAAT
579	REM_tnt.REM19_col_a_m1	REM19	Brachypodium	4288	4302	-	15.0448	4.23e-06	0.0089	ACAAAAAAAACAACA
580	C2C2dof_tnt.At4g38000_col_a_m1	At4g38000	Brachypodium	1183	1210	+	14.7727	4.26e-06	0.00592	TTTTATTTATATTCTCTTTTTTCTTTTC
581	C2C2dof_tnt.OBP3_col_a_m1	OBP3	Brachypodium	2780	2800	-	14.8182	4.33e-06	0.00973	TTTCTTTTTTCCCTTTCTTTC
582	C2C2dof_tnt.At4g38000_col_a_m1	At4g38000	Brachypodium	1185	1212	+	14.6515	4.63e-06	0.00592	TTATTTATATTCTCTTTTTTCTTTTCTC
583	C2C2dof_tnt.At4g38000_col_a_m1	At4g38000	Brachypodium	1182	1209	+	14.6364	4.68e-06	0.00592	CTTTTATTTATATTCTCTTTTTTCTTTT
584	C2C2dof_tnt.OBP3_colamp_a_m1	OBP3	Brachypodium	1193	1211	+	14.2879	4.72e-06	0.0255	ATTCTCTTTTTTCTTTTCT
585	C2C2dof_tnt.AT5G66940_colamp_a_m1	AT5G66940	Brachypodium	2790	2810	-	14.6212	5.09e-06	0.0403	CATTTTTTCTTTTCTTTTTTC
586	BBRBPC_tnt.BPC5_colamp_a_m1	BPC5	Brachypodium	2776	2804	+	5.57317	5.1e-06	0.00822	GCAAGAAAGAAAGGGAAAAAAGAAAAGAA
587	C2C2dof_tnt.OBP3_col_a_m1	OBP3	Brachypodium	2779	2799	-	14.5909	5.13e-06	0.0103	TTCTTTTTTCCCTTTCTTTCT
588	ABI3VP1_tnt.VRN1_colamp_a_m1	VRN1	Brachypodium	4289	4307	+	13.3333	5.15e-06	0.0106	GTTGTTTTTTTTGTATGGT
589	C2C2dof_tnt.At4g38000_col_a_m1	At4g38000	Brachypodium	1178	1205	+	14.4697	5.23e-06	0.00637	AAGTCTTTTATTTATATTCTCTTTTTTC
590	BBRBPC_tnt.BPC5_colamp_a_m1	BPC5	Brachypodium	2780	2808	+	5.45122	5.3e-06	0.00822	GAAAGAAAGGGAAAAAAGAAAAGAAAAAA
591	BBRBPC_tnt.BPC1_col_a_m1	BPC1	Brachypodium	2778	2801	+	6.83333	5.57e-06	0.00915	AAGAAAGAAAGGGAAAAAAGAAAA
592	ABI3VP1_tnt.VRN1_col_a_m1	VRN1	Brachypodium	2711	2739	+	-4.89552	5.67e-06	0.0038	ACTAGTGATTTATTTATTTATTTTTGAAA
593	C2H2_tnt.TF3A_col_a_m1	TF3A	Brachypodium	884	902	-	13.792	5.83e-06	0.0188	CTTTATTTTCCTCCCCATC
594	C2C2dof_tnt.OBP3_colamp_a_m1	OBP3	Brachypodium	2782	2800	-	14.0455	6.06e-06	0.0262	TTTCTTTTTTCCCTTTCTT
595	ABI3VP1_tnt.VRN1_col_a_m1	VRN1	Brachypodium	3090	3118	-	-5.29851	6.23e-06	0.00394	AAGTGTCTATTTTTGGTTTTTCTTTGTAG
596	ABI3VP1_tnt.VRN1_colamp_a_m1	VRN1	Brachypodium	1342	1360	+	12.8611	6.27e-06	0.0115	GATTTTTTTTTGTTTCGAG
597	REM_tnt.REM19_col_a_m1	REM19	Brachypodium	1195	1209	-	14.2836	6.96e-06	0.0108	AAAAGAAAAAAGAGA
598	BBRBPC_tnt.BPC1_col_a_m1	BPC1	Brachypodium	2784	2807	+	6.09091	7.26e-06	0.01	GAAAGGGAAAAAAGAAAAGAAAAA
599	ABI3VP1_tnt.VRN1_col_a_m1	VRN1	Brachypodium	1183	1211	+	-6.40299	8.04e-06	0.0046	TTTTATTTATATTCTCTTTTTTCTTTTCT
600	ABI3VP1_tnt.VRN1_colamp_a_m1	VRN1	Brachypodium	3791	3809	+	12.2083	8.16e-06	0.0128	TACATTTTTTTTGTCGGTG
601	ABI3VP1_tnt.VRN1_colamp_a_m1	VRN1	Brachypodium	4287	4305	+	11.9444	9.07e-06	0.0136	TTGTTGTTTTTTTTGTATG
602	C2C2dof_tnt.At4g38000_col_a_m1	At4g38000	Brachypodium	2780	2807	-	13.5303	9.66e-06	0.00987	TTTTTCTTTTCTTTTTTCCCTTTCTTTC
603	REM_tnt.REM19_colamp_a_m1	REM19	Brachypodium	930	950	-	12.2687	9.86e-06	0.00773	ATTGGAAAAAAAAAAGGTGAG
604	ABI3VP1_tnt.VRN1_col_a_m1	VRN1	Brachypodium	2776	2804	-	-7.49254	1.03e-05	0.00521	TTCTTTTCTTTTTTCCCTTTCTTTCTTGC
605	BBRBPC_tnt.BPC1_col_a_m1	BPC1	Brachypodium	825	848	-	5.06061	1.04e-05	0.0122	GATAAAAATTGAAAGGGAGCAAGG
606	ABI3VP1_tnt.VRN1_colamp_a_m1	VRN1	Brachypodium	1196	1214	+	11.5417	1.06e-05	0.0141	CTCTTTTTTCTTTTCTCCA
607	ABI3VP1_tnt.VRN1_colamp_a_m1	VRN1	Brachypodium	3092	3110	-	11.5278	1.06e-05	0.0141	ATTTTTGGTTTTTCTTTGT
608	REM_tnt.REM19_colamp_a_m1	REM19	Brachypodium	1194	1214	-	12.0896	1.07e-05	0.00812	TGGAGAAAAGAAAAAAGAGAA
609	ABI3VP1_tnt.VRN1_col_a_m1	VRN1	Brachypodium	2790	2818	-	-7.70149	1.08e-05	0.00533	AGTGGTAGCATTTTTTCTTTTCTTTTTTC
610	ABI3VP1_tnt.VRN1_col_a_m1	VRN1	Brachypodium	3089	3117	-	-7.77612	1.1e-05	0.00534	AGTGTCTATTTTTGGTTTTTCTTTGTAGT
611	BBRBPC_tnt.BPC1_colamp_a_m1	BPC1	Brachypodium	2778	2792	-	11.1667	1.1e-05	0.0245	TTCCCTTTCTTTCTT
612	ABI3VP1_tnt.VRN1_col_a_m1	VRN1	Brachypodium	2781	2809	-	-7.95522	1.14e-05	0.00538	ATTTTTTCTTTTCTTTTTTCCCTTTCTTT
613	ABI3VP1_tnt.VRN1_colamp_a_m1	VRN1	Brachypodium	932	950	+	11.3194	1.15e-05	0.0143	CACCTTTTTTTTTTCCAAT
614	BBRBPC_tnt.BPC5_colamp_a_m1	BPC5	Brachypodium	2782	2810	+	2.70732	1.21e-05	0.0128	AAGAAAGGGAAAAAAGAAAAGAAAAAATG
615	REM_tnt.REM19_colamp_a_m1	REM19	Brachypodium	1340	1360	-	11.806	1.23e-05	0.00867	CTCGAAACAAAAAAAAATCTT
616	C2C2dof_tnt.At4g38000_col_a_m1	At4g38000	Brachypodium	204	231	+	13.1212	1.25e-05	0.0115	TCCTTTCAGTTTTATTTCTTATTTTACG
617	ABI3VP1_tnt.VRN1_col_a_m1	VRN1	Brachypodium	3088	3116	-	-8.44776	1.27e-05	0.00574	GTGTCTATTTTTGGTTTTTCTTTGTAGTC
618	REM_tnt.REM19_colamp_a_m1	REM19	Brachypodium	3089	3109	+	11.7164	1.28e-05	0.00875	ACTACAAAGAAAAACCAAAAA
619	ABI3VP1_tnt.VRN1_col_a_m1	VRN1	Brachypodium	1184	1212	+	-8.50746	1.29e-05	0.00574	TTTATTTATATTCTCTTTTTTCTTTTCTC
620	ABI3VP1_tnt.VRN1_col_a_m1	VRN1	Brachypodium	3093	3121	-	-8.58209	1.31e-05	0.00575	CATAAGTGTCTATTTTTGGTTTTTCTTTG
621	BBRBPC_tnt.BPC5_col_a_m1	BPC5	Brachypodium	2779	2808	+	-37.1184	1.31e-05	0.0197	AGAAAGAAAGGGAAAAAAGAAAAGAAAAAA
622	REM_tnt.REM19_colamp_a_m1	REM19	Brachypodium	4284	4304	-	11.6567	1.31e-05	0.0089	ATACAAAAAAAACAACAAGCG
623	ABI3VP1_tnt.VRN1_colamp_a_m1	VRN1	Brachypodium	1339	1357	+	10.8889	1.35e-05	0.0159	CAAGATTTTTTTTTGTTTC
624	REM_tnt.REM19_colamp_a_m1	REM19	Brachypodium	1339	1359	-	11.5672	1.37e-05	0.009	TCGAAACAAAAAAAAATCTTG
625	BBRBPC_tnt.BPC5_col_a_m1	BPC5	Brachypodium	352	381	+	-37.3816	1.38e-05	0.0202	GGAGTATAAGATAAAATGTGACAGGAAGAT
626	ABI3VP1_tnt.VRN1_col_a_m1	VRN1	Brachypodium	1178	1206	+	-8.83582	1.39e-05	0.006	AAGTCTTTTATTTATATTCTCTTTTTTCT
627	REM_tnt.REM19_colamp_a_m1	REM19	Brachypodium	4289	4309	-	11.5224	1.4e-05	0.009	GAACCATACAAAAAAAACAAC
628	ABI3VP1_tnt.VRN1_col_a_m1	VRN1	Brachypodium	2778	2806	-	-8.8806	1.4e-05	0.00601	TTTTCTTTTCTTTTTTCCCTTTCTTTCTT
629	BBRBPC_tnt.BPC1_col_a_m1	BPC1	Brachypodium	2780	2803	+	4.18182	1.4e-05	0.0151	GAAAGAAAGGGAAAAAAGAAAAGA
630	ABI3VP1_tnt.VRN1_col_a_m1	VRN1	Brachypodium	4275	4303	+	-9.07463	1.46e-05	0.00619	CCCGTCTCTCGCTTGTTGTTTTTTTTGTA
631	C2C2dof_tnt.At4g38000_col_a_m1	At4g38000	Brachypodium	2791	2818	-	12.8636	1.46e-05	0.0131	AGTGGTAGCATTTTTTCTTTTCTTTTTT
632	C2C2dof_tnt.OBP3_colamp_a_m1	OBP3	Brachypodium	2778	2796	-	13.1061	1.49e-05	0.0373	TTTTTTCCCTTTCTTTCTT
633	BBRBPC_tnt.BPC1_col_a_m1	BPC1	Brachypodium	1189	1212	-	3.93939	1.52e-05	0.0156	GAGAAAAGAAAAAAGAGAATATAA
634	ND_tnt.FRS9_col_a_m1	FRS9	Brachypodium	4435	4455	+	7.66667	1.52e-05	0.0195	CCCTCTGGCTCTCTCCTCTCC
635	REM_tnt.REM19_col_a_m1	REM19	Brachypodium	2793	2807	+	12.9254	1.53e-05	0.0162	AAAAGAAAAGAAAAA
636	REM_tnt.REM19_col_a_m1	REM19	Brachypodium	2791	2805	+	12.8806	1.58e-05	0.0163	AAAAAAGAAAAGAAA
637	BBRBPC_tnt.BPC1_col_a_m1	BPC1	Brachypodium	1979	2002	-	3.78788	1.6e-05	0.0156	GGCTCAGGGAGATGGGGAGGGAAA
638	C2C2dof_tnt.OBP3_col_a_m1	OBP3	Brachypodium	2791	2811	-	12.9394	1.61e-05	0.0202	GCATTTTTTCTTTTCTTTTTT
639	C2C2dof_tnt.OBP3_col_a_m1	OBP3	Brachypodium	2787	2807	-	12.9242	1.62e-05	0.0202	TTTTTCTTTTCTTTTTTCCCT
640	ABI3VP1_tnt.VRN1_col_a_m1	VRN1	Brachypodium	2707	2735	+	-9.62687	1.65e-05	0.0067	GCATACTAGTGATTTATTTATTTATTTTT
641	REM_tnt.REM19_colamp_a_m1	REM19	Brachypodium	1195	1215	-	11.1642	1.65e-05	0.0103	TTGGAGAAAAGAAAAAAGAGA
642	ABI3VP1_tnt.VRN1_colamp_a_m1	VRN1	Brachypodium	1193	1211	+	10.3472	1.65e-05	0.0177	ATTCTCTTTTTTCTTTTCT
643	C2C2dof_tnt.AT1G69570_col_a_m1	AT1G69570	Brachypodium	200	226	+	12.5606	1.72e-05	0.0333	GTGTTCCTTTCAGTTTTATTTCTTATT
644	REM_tnt.REM19_colamp_a_m1	REM19	Brachypodium	4286	4306	-	11.0448	1.74e-05	0.0106	CCATACAAAAAAAACAACAAG
645	BBRBPC_tnt.BPC1_col_a_m1	BPC1	Brachypodium	2776	2799	+	3.34848	1.86e-05	0.0163	GCAAGAAAGAAAGGGAAAAAAGAA
646	BBRBPC_tnt.BPC5_col_a_m1	BPC5	Brachypodium	2781	2810	+	-39.1711	1.86e-05	0.025	AAAGAAAGGGAAAAAAGAAAAGAAAAAATG
647	ABI3VP1_tnt.VRN1_col_a_m1	VRN1	Brachypodium	1189	1217	+	-10.2388	1.88e-05	0.00718	TTATATTCTCTTTTTTCTTTTCTCCAAAG
648	REM_tnt.REM19_col_a_m1	REM19	Brachypodium	4290	4304	-	12.5373	1.9e-05	0.0174	ATACAAAAAAAACAA
649	C2H2_tnt.TF3A_col_a_m1	TF3A	Brachypodium	887	905	-	11.696	1.97e-05	0.0317	CTCCTTTATTTTCCTCCCC
650	ND_tnt.FRS9_col_a_m1	FRS9	Brachypodium	2784	2804	-	6.93939	1.98e-05	0.0226	TTCTTTTCTTTTTTCCCTTTC
651	C2C2dof_tnt.AT5G66940_col_a_m1	AT5G66940	Brachypodium	2790	2818	-	12.4242	2.08e-05	0.035	AGTGGTAGCATTTTTTCTTTTCTTTTTTC
652	ND_tnt.FRS9_col_a_m1	FRS9	Brachypodium	2782	2802	-	6.78788	2.09e-05	0.023	CTTTTCTTTTTTCCCTTTCTT
653	BBRBPC_tnt.BPC5_colamp_a_m1	BPC5	Brachypodium	2772	2800	+	0.768293	2.12e-05	0.0177	TCCGGCAAGAAAGAAAGGGAAAAAAGAAA
654	C2C2dof_tnt.At4g38000_col_a_m1	At4g38000	Brachypodium	2781	2808	-	12.2273	2.14e-05	0.0161	TTTTTTCTTTTCTTTTTTCCCTTTCTTT
655	REM_tnt.REM19_col_a_m1	REM19	Brachypodium	3795	3809	-	12.2985	2.14e-05	0.019	CACCGACAAAAAAAA
656	REM_tnt.REM19_col_a_m1	REM19	Brachypodium	2786	2800	+	12.2687	2.18e-05	0.019	AAGGGAAAAAAGAAA
657	C2C2dof_tnt.OBP3_col_a_m1	OBP3	Brachypodium	1192	1212	+	12.4545	2.19e-05	0.0236	TATTCTCTTTTTTCTTTTCTC
658	ABI3VP1_tnt.VRN1_col_a_m1	VRN1	Brachypodium	4282	4310	+	-11.0896	2.25e-05	0.00823	CTCGCTTGTTGTTTTTTTTGTATGGTTCT
659	ABI3VP1_tnt.VRN1_col_a_m1	VRN1	Brachypodium	1179	1207	+	-11.1045	2.26e-05	0.00823	AGTCTTTTATTTATATTCTCTTTTTTCTT
660	ABI3VP1_tnt.VRN1_col_a_m1	VRN1	Brachypodium	2710	2738	+	-11.2985	2.35e-05	0.00838	TACTAGTGATTTATTTATTTATTTTTGAA
661	C2C2dof_tnt.At4g38000_col_a_m1	At4g38000	Brachypodium	2779	2806	-	12.0606	2.36e-05	0.0161	TTTTCTTTTCTTTTTTCCCTTTCTTTCT
662	ABI3VP1_tnt.VRN1_colamp_a_m1	VRN1	Brachypodium	2784	2802	-	9.31944	2.37e-05	0.0201	CTTTTCTTTTTTCCCTTTC
663	ABI3VP1_tnt.VRN1_colamp_a_m1	VRN1	Brachypodium	2792	2810	-	9.26389	2.42e-05	0.0201	CATTTTTTCTTTTCTTTTT
664	ABI3VP1_tnt.VRN1_col_a_m1	VRN1	Brachypodium	4277	4305	+	-11.8358	2.63e-05	0.00897	CGTCTCTCGCTTGTTGTTTTTTTTGTATG
665	REM_tnt.REM19_colamp_a_m1	REM19	Brachypodium	2785	2805	+	10.0896	2.66e-05	0.0139	AAAGGGAAAAAAGAAAAGAAA
666	ABI3VP1_tnt.VRN1_colamp_a_m1	VRN1	Brachypodium	1343	1361	+	8.93056	2.71e-05	0.0215	ATTTTTTTTTGTTTCGAGC
667	REM_tnt.REM19_colamp_a_m1	REM19	Brachypodium	2793	2813	+	10.0448	2.71e-05	0.014	AAAAGAAAAGAAAAAATGCTA
668	BBRBPC_tnt.BPC5_colamp_a_m1	BPC5	Brachypodium	2777	2805	+	-0.170732	2.75e-05	0.0202	CAAGAAAGAAAGGGAAAAAAGAAAAGAAA
669	C2C2dof_tnt.At4g38000_col_a_m1	At4g38000	Brachypodium	1180	1207	+	11.7879	2.77e-05	0.017	GTCTTTTATTTATATTCTCTTTTTTCTT
670	BBRBPC_tnt.BPC5_colamp_a_m1	BPC5	Brachypodium	353	381	+	-0.207317	2.77e-05	0.0202	GAGTATAAGATAAAATGTGACAGGAAGAT
671	C2C2dof_tnt.AT5G66940_col_a_m1	AT5G66940	Brachypodium	1183	1211	+	11.8485	2.93e-05	0.0423	TTTTATTTATATTCTCTTTTTTCTTTTCT
672	REM_tnt.REM19_colamp_a_m1	REM19	Brachypodium	1341	1361	-	9.86567	2.93e-05	0.0149	GCTCGAAACAAAAAAAAATCT
673	ABI3VP1_tnt.VRN1_colamp_a_m1	VRN1	Brachypodium	3790	3808	+	8.68056	2.94e-05	0.0226	GTACATTTTTTTTGTCGGT
674	REM_tnt.REM19_col_a_m1	REM19	Brachypodium	1345	1359	-	11.6866	2.95e-05	0.0229	TCGAAACAAAAAAAA
675	C2C2dof_tnt.AT5G66940_col_a_m1	AT5G66940	Brachypodium	3821	3849	-	11.7576	3.08e-05	0.0423	GTGCAGTACATTTTTCCTTTTGTGTATGA
676	C2C2dof_tnt.AT5G66940_col_a_m1	AT5G66940	Brachypodium	3091	3119	-	11.7424	3.11e-05	0.0423	TAAGTGTCTATTTTTGGTTTTTCTTTGTA
677	ND_tnt.FRS9_col_a_m1	FRS9	Brachypodium	2774	2794	-	5.59091	3.17e-05	0.0304	TTTTCCCTTTCTTTCTTGCCG
678	BBRBPC_tnt.BPC1_colamp_a_m1	BPC1	Brachypodium	2782	2796	-	8.39394	3.27e-05	0.0406	TTTTTTCCCTTTCTT
679	ABI3VP1_tnt.VRN1_colamp_a_m1	VRN1	Brachypodium	3088	3106	-	8.33333	3.3e-05	0.0226	TTGGTTTTTCTTTGTAGTC
680	ABI3VP1_tnt.VRN1_colamp_a_m1	VRN1	Brachypodium	4288	4306	+	8.31944	3.32e-05	0.0226	TGTTGTTTTTTTTGTATGG
681	BBRBPC_tnt.BPC5_col_a_m1	BPC5	Brachypodium	2783	2812	+	-42.6579	3.37e-05	0.0356	AGAAAGGGAAAAAAGAAAAGAAAAAATGCT
682	REM_tnt.REM19_colamp_a_m1	REM19	Brachypodium	1337	1357	-	9.43284	3.53e-05	0.0173	GAAACAAAAAAAAATCTTGAG
683	ABI3VP1_tnt.VRN1_col_a_m1	VRN1	Brachypodium	3094	3122	-	-13.2687	3.54e-05	0.0107	CCATAAGTGTCTATTTTTGGTTTTTCTTT
684	ABI3VP1_tnt.VRN1_col_a_m1	VRN1	Brachypodium	4280	4308	+	-13.2985	3.56e-05	0.0107	CTCTCGCTTGTTGTTTTTTTTGTATGGTT
685	C2C2dof_tnt.AT5G66940_col_a_m1	AT5G66940	Brachypodium	2783	2811	-	11.4848	3.6e-05	0.0442	GCATTTTTTCTTTTCTTTTTTCCCTTTCT
686	BBRBPC_tnt.BPC5_colamp_a_m1	BPC5	Brachypodium	1250	1278	-	-1.21951	3.65e-05	0.0243	GACAGTTGGAGAGCTGAGTAGATGAAGAT
687	ABI3VP1_tnt.VRN1_colamp_a_m1	VRN1	Brachypodium	2788	2806	-	8.01389	3.67e-05	0.0239	TTTTCTTTTCTTTTTTCCC
688	REM_tnt.REM19_col_a_m1	REM19	Brachypodium	1197	1211	-	11.2537	3.67e-05	0.0256	AGAAAAGAAAAAAGA
689	C2C2dof_tnt.OBP3_col_a_m1	OBP3	Brachypodium	3093	3113	-	11.5909	3.7e-05	0.0314	TCTATTTTTGGTTTTTCTTTG
690	ABI3VP1_tnt.VRN1_colamp_a_m1	VRN1	Brachypodium	3793	3811	+	7.95833	3.73e-05	0.024	CATTTTTTTTGTCGGTGTA
691	C2H2_tnt.TF3A_col_a_m1	TF3A	Brachypodium	3577	3595	-	10.512	3.75e-05	0.0389	CTTCACCTTGATCATCCAC
692	C2C2dof_tnt.At4g38000_col_a_m1	At4g38000	Brachypodium	1179	1206	+	11.1212	4.03e-05	0.0222	AGTCTTTTATTTATATTCTCTTTTTTCT
693	C2C2dof_tnt.OBP3_col_a_m1	OBP3	Brachypodium	1195	1215	+	11.4242	4.08e-05	0.0337	TCTCTTTTTTCTTTTCTCCAA
694	BBRBPC_tnt.BPC1_col_a_m1	BPC1	Brachypodium	1971	1994	-	0.848485	4.14e-05	0.0273	GAGATGGGGAGGGAAATAAGAGGG
695	C2H2_tnt.TF3A_col_a_m1	TF3A	Brachypodium	2028	2046	+	10.312	4.18e-05	0.0396	CCACTACTACTTCCACCAC
696	ABI3VP1_tnt.VRN1_col_a_m1	VRN1	Brachypodium	2784	2812	-	-14.209	4.28e-05	0.0122	AGCATTTTTTCTTTTCTTTTTTCCCTTTC
697	ND_tnt.FRS9_col_a_m1	FRS9	Brachypodium	1974	1994	+	4.69697	4.29e-05	0.037	TCTTATTTCCCTCCCCATCTC
698	C2C2dof_tnt.At4g38000_col_a_m1	At4g38000	Brachypodium	2776	2803	-	10.9848	4.34e-05	0.0226	TCTTTTCTTTTTTCCCTTTCTTTCTTGC
699	REM_tnt.REM19_col_a_m1	REM19	Brachypodium	1344	1358	-	10.8806	4.39e-05	0.0283	CGAAACAAAAAAAAA
700	REM_tnt.REM19_colamp_a_m1	REM19	Brachypodium	2789	2809	+	8.89552	4.42e-05	0.0198	GGAAAAAAGAAAAGAAAAAAT
701	C2C2dof_tnt.OBP3_col_a_m1	OBP3	Brachypodium	930	950	+	11.2727	4.46e-05	0.035	CTCACCTTTTTTTTTTCCAAT
702	REM_tnt.REM19_col_a_m1	REM19	Brachypodium	1194	1208	-	10.8358	4.49e-05	0.0283	AAAGAAAAAAGAGAA
703	REM_tnt.REM19_col_a_m1	REM19	Brachypodium	4286	4300	-	10.806	4.55e-05	0.0283	AAAAAAAACAACAAG
704	ABI3VP1_tnt.VRN1_colamp_a_m1	VRN1	Brachypodium	4285	4303	+	7.31944	4.58e-05	0.0268	GCTTGTTGTTTTTTTTGTA
705	ABI3VP1_tnt.VRN1_col_a_m1	VRN1	Brachypodium	206	234	+	-14.597	4.63e-05	0.0128	CTTTCAGTTTTATTTCTTATTTTACGAGA
706	ABI3VP1_tnt.VRN1_colamp_a_m1	VRN1	Brachypodium	3096	3114	-	7.27778	4.64e-05	0.0269	GTCTATTTTTGGTTTTTCT
707	C2H2_tnt.TF3A_col_a_m1	TF3A	Brachypodium	2025	2043	+	10.112	4.64e-05	0.0399	CTCCCACTACTACTTCCAC
708	C2C2dof_tnt.OBP3_col_a_m1	OBP3	Brachypodium	2785	2805	-	11.1818	4.7e-05	0.0364	TTTCTTTTCTTTTTTCCCTTT
709	ABI3VP1_tnt.VRN1_colamp_a_m1	VRN1	Brachypodium	2791	2809	-	7.18056	4.79e-05	0.0273	ATTTTTTCTTTTCTTTTTT
710	ABI3VP1_tnt.VRN1_col_a_m1	VRN1	Brachypodium	4279	4307	+	-14.806	4.83e-05	0.0133	TCTCTCGCTTGTTGTTTTTTTTGTATGGT
711	C2C2dof_tnt.OBP3_col_a_m1	OBP3	Brachypodium	2788	2808	-	11.1061	4.9e-05	0.0365	TTTTTTCTTTTCTTTTTTCCC
712	C2C2dof_tnt.At4g38000_col_a_m1	At4g38000	Brachypodium	66	93	+	10.7576	4.92e-05	0.0245	TACCTCCTTATTTCTTATCAATTTTTAG
713	REM_tnt.REM19_col_a_m1	REM19	Brachypodium	933	947	-	10.6269	4.94e-05	0.0299	GGAAAAAAAAAAGGT
714	ND_tnt.FRS9_col_a_m1	FRS9	Brachypodium	1623	1643	-	4.25758	4.96e-05	0.0407	CCAACCATCTCTTTCCTCATT
715	BBRBPC_tnt.BPC5_col_a_m1	BPC5	Brachypodium	2777	2806	+	-45.1711	5.1e-05	0.0423	CAAGAAAGAAAGGGAAAAAAGAAAAGAAAA
716	BBRBPC_tnt.BPC5_colamp_a_m1	BPC5	Brachypodium	1180	1208	-	-2.4878	5.1e-05	0.0289	AAAGAAAAAAGAGAATATAAATAAAAGAC
717	BBRBPC_tnt.BPC1_col_a_m1	BPC1	Brachypodium	4430	4453	-	0.166667	5.12e-05	0.0318	AGAGGAGAGAGCCAGAGGGGGGGG
718	ABI3VP1_tnt.VRN1_col_a_m1	VRN1	Brachypodium	2773	2801	-	-15.1194	5.14e-05	0.0138	TTTTCTTTTTTCCCTTTCTTTCTTGCCGG
719	ABI3VP1_tnt.VRN1_col_a_m1	VRN1	Brachypodium	1187	1215	+	-15.1343	5.15e-05	0.0138	ATTTATATTCTCTTTTTTCTTTTCTCCAA
720	REM_tnt.REM19_col_a_m1	REM19	Brachypodium	2722	2736	-	10.4925	5.26e-05	0.0309	CAAAAATAAATAAAT
721	BBRBPC_tnt.BPC5_colamp_a_m1	BPC5	Brachypodium	2773	2801	+	-2.7561	5.47e-05	0.0296	CCGGCAAGAAAGAAAGGGAAAAAAGAAAA
722	C2C2dof_tnt.OBP3_col_a_m1	OBP3	Brachypodium	202	222	+	10.8939	5.53e-05	0.0377	GTTCCTTTCAGTTTTATTTCT
723	BBRBPC_tnt.BPC1_col_a_m1	BPC1	Brachypodium	4428	4451	-	-0.0909091	5.54e-05	0.0334	AGGAGAGAGCCAGAGGGGGGGGCT
724	REM_tnt.REM19_col_a_m1	REM19	Brachypodium	3790	3804	-	10.3433	5.64e-05	0.0319	ACAAAAAAAATGTAC
725	ABI3VP1_tnt.VRN1_colamp_a_m1	VRN1	Brachypodium	1341	1359	+	6.58333	5.76e-05	0.0299	AGATTTTTTTTTGTTTCGA
726	REM_tnt.REM19_colamp_a_m1	REM19	Brachypodium	2781	2801	+	8.14925	6e-05	0.0237	AAAGAAAGGGAAAAAAGAAAA
727	REM_tnt.REM19_colamp_a_m1	REM19	Brachypodium	2792	2812	+	8.14925	6e-05	0.0237	AAAAAGAAAAGAAAAAATGCT
728	C2C2dof_tnt.At4g38000_col_a_m1	At4g38000	Brachypodium	2777	2804	-	10.3788	6.02e-05	0.0278	TTCTTTTCTTTTTTCCCTTTCTTTCTTG
729	ABI3VP1_tnt.VRN1_col_a_m1	VRN1	Brachypodium	2783	2811	-	-16.0896	6.22e-05	0.0156	GCATTTTTTCTTTTCTTTTTTCCCTTTCT
730	C2C2dof_tnt.OBP3_col_a_m1	OBP3	Brachypodium	931	951	+	10.6818	6.22e-05	0.0388	TCACCTTTTTTTTTTCCAATG
731	ABI3VP1_tnt.VRN1_col_a_m1	VRN1	Brachypodium	2775	2803	-	-16.1343	6.27e-05	0.0156	TCTTTTCTTTTTTCCCTTTCTTTCTTGCC
732	BBRBPC_tnt.BPC5_colamp_a_m1	BPC5	Brachypodium	2779	2807	+	-3.31707	6.32e-05	0.032	AGAAAGAAAGGGAAAAAAGAAAAGAAAAA
733	C2C2dof_tnt.At4g38000_col_a_m1	At4g38000	Brachypodium	192	219	+	10.2727	6.37e-05	0.028	ATCTTGATGTGTTCCTTTCAGTTTTATT
734	ABI3VP1_tnt.VRN1_colamp_a_m1	VRN1	Brachypodium	3176	3194	+	6.23611	6.4e-05	0.0319	TTGAATTTTGTTTGGTTTA
735	REM_tnt.REM19_colamp_a_m1	REM19	Brachypodium	1190	1210	-	7.98507	6.41e-05	0.0247	GAAAAGAAAAAAGAGAATATA
736	ABI3VP1_tnt.VRN1_colamp_a_m1	VRN1	Brachypodium	3091	3109	-	6.20833	6.45e-05	0.0319	TTTTTGGTTTTTCTTTGTA
737	ABI3VP1_tnt.VRN1_colamp_a_m1	VRN1	Brachypodium	4282	4300	+	6.16667	6.53e-05	0.0319	CTCGCTTGTTGTTTTTTTT
738	REM_tnt.REM19_colamp_a_m1	REM19	Brachypodium	3791	3811	-	7.92537	6.57e-05	0.0252	TACACCGACAAAAAAAATGTA
739	C2C2dof_tnt.OBP3_col_a_m1	OBP3	Brachypodium	830	850	+	10.5758	6.6e-05	0.0395	CTCCCTTTCAATTTTTATCTT
740	C2C2dof_tnt.OBP3_col_a_m1	OBP3	Brachypodium	2794	2814	-	10.5758	6.6e-05	0.0395	GTAGCATTTTTTCTTTTCTTT
741	C2H2_tnt.TF3A_col_a_m1	TF3A	Brachypodium	4443	4461	+	9.416	6.67e-05	0.0499	CTCTCTCCTCTCCCTGCTT
742	ABI3VP1_tnt.VRN1_col_a_m1	VRN1	Brachypodium	2791	2819	-	-16.5522	6.8e-05	0.0166	AAGTGGTAGCATTTTTTCTTTTCTTTTTT
743	ABI3VP1_tnt.VRN1_col_a_m1	VRN1	Brachypodium	2709	2737	+	-16.597	6.86e-05	0.0166	ATACTAGTGATTTATTTATTTATTTTTGA
744	REM_tnt.REM19_colamp_a_m1	REM19	Brachypodium	929	949	-	7.74627	7.06e-05	0.0264	TTGGAAAAAAAAAAGGTGAGT
745	C2C2dof_tnt.At4g38000_col_a_m1	At4g38000	Brachypodium	1181	1208	+	10.0758	7.06e-05	0.0294	TCTTTTATTTATATTCTCTTTTTTCTTT
746	C2C2dof_tnt.OBP3_col_a_m1	OBP3	Brachypodium	208	228	+	10.4242	7.16e-05	0.0414	TTCAGTTTTATTTCTTATTTT
747	ABI3VP1_tnt.VRN1_col_a_m1	VRN1	Brachypodium	2787	2815	-	-16.8209	7.17e-05	0.017	GGTAGCATTTTTTCTTTTCTTTTTTCCCT
748	REM_tnt.REM19_colamp_a_m1	REM19	Brachypodium	4290	4310	-	7.64179	7.36e-05	0.0269	AGAACCATACAAAAAAAACAA
749	ABI3VP1_tnt.VRN1_col_a_m1	VRN1	Brachypodium	4273	4301	+	-16.9701	7.38e-05	0.0171	CCCCCGTCTCTCGCTTGTTGTTTTTTTTG
750	ABI3VP1_tnt.VRN1_col_a_m1	VRN1	Brachypodium	3091	3119	-	-16.9851	7.4e-05	0.0171	TAAGTGTCTATTTTTGGTTTTTCTTTGTA
751	ABI3VP1_tnt.VRN1_col_a_m1	VRN1	Brachypodium	1332	1360	+	-17.0299	7.46e-05	0.0172	GCTGCCTCAAGATTTTTTTTTGTTTCGAG
752	ABI3VP1_tnt.VRN1_col_a_m1	VRN1	Brachypodium	203	231	+	-17.1791	7.68e-05	0.0176	TTCCTTTCAGTTTTATTTCTTATTTTACG
753	BBRBPC_tnt.BPC5_colamp_a_m1	BPC5	Brachypodium	930	958	-	-4.09756	7.7e-05	0.0364	GAATGTACATTGGAAAAAAAAAAGGTGAG
754	C2C2dof_tnt.At4g38000_col_a_m1	At4g38000	Brachypodium	2790	2817	-	9.84848	7.94e-05	0.0324	GTGGTAGCATTTTTTCTTTTCTTTTTTC
755	REM_tnt.REM19_col_a_m1	REM19	Brachypodium	2787	2801	+	9.58209	7.98e-05	0.0389	AGGGAAAAAAGAAAA
756	ABI3VP1_tnt.VRN1_col_a_m1	VRN1	Brachypodium	205	233	+	-17.5522	8.25e-05	0.0185	CCTTTCAGTTTTATTTCTTATTTTACGAG
757	C2C2dof_tnt.At4g38000_col_a_m1	At4g38000	Brachypodium	2710	2737	+	9.74242	8.38e-05	0.0333	TACTAGTGATTTATTTATTTATTTTTGA
758	BBRBPC_tnt.BPC1_col_a_m1	BPC1	Brachypodium	1973	1996	-	-1.62121	8.76e-05	0.0408	GGGAGATGGGGAGGGAAATAAGAG
759	C2C2dof_tnt.OBP3_col_a_m1	OBP3	Brachypodium	209	229	+	10.0455	8.77e-05	0.0477	TCAGTTTTATTTCTTATTTTA
760	C2C2dof_tnt.OBP3_col_a_m1	OBP3	Brachypodium	2778	2798	-	10.0303	8.84e-05	0.0477	TCTTTTTTCCCTTTCTTTCTT
761	REM_tnt.REM19_colamp_a_m1	REM19	Brachypodium	1342	1362	-	7.13433	8.98e-05	0.0293	TGCTCGAAACAAAAAAAAATC
762	BBRBPC_tnt.BPC5_colamp_a_m1	BPC5	Brachypodium	1974	2002	-	-4.71951	9e-05	0.0398	GGCTCAGGGAGATGGGGAGGGAAATAAGA
763	ABI3VP1_tnt.VRN1_col_a_m1	VRN1	Brachypodium	2779	2807	-	-18.0597	9.08e-05	0.0193	TTTTTCTTTTCTTTTTTCCCTTTCTTTCT
764	REM_tnt.REM19_colamp_a_m1	REM19	Brachypodium	1193	1213	-	7.04478	9.3e-05	0.0299	GGAGAAAAGAAAAAAGAGAAT
765	C2C2dof_tnt.OBP3_col_a_m1	OBP3	Brachypodium	829	849	+	9.89394	9.5e-05	0.0499	GCTCCCTTTCAATTTTTATCT
766	ABI3VP1_tnt.VRN1_colamp_a_m1	VRN1	Brachypodium	2793	2811	-	4.80556	9.73e-05	0.0402	GCATTTTTTCTTTTCTTTT
767	ABI3VP1_tnt.VRN1_colamp_a_m1	VRN1	Brachypodium	930	948	+	4.75	9.89e-05	0.0402	CTCACCTTTTTTTTTTCCA
768	REM_tnt.REM19_colamp_a_m1	REM19	Brachypodium	2718	2738	-	6.8806	9.91e-05	0.0308	TTCAAAAATAAATAAATAAAT
769	REM_tnt.REM19_col_a_m1	REM19	Brachypodium	931	945	-	9.07463	9.91e-05	0.044	AAAAAAAAAAGGTGA
770	BBRBPC_tnt.BPC1_col_a_m1	BPC1	Brachypodium	882	905	+	-2.04545	9.91e-05	0.0438	AAGATGGGGAGGAAAATAAAGGAG
771	ND_tnt.FRS9_col_a_m1	FRS9	Maize	131	151	+	28.4545	2.49e-10	1.59e-05	CTCTCTCTCCCTCTCCCTCTC
772	BBRBPC_tnt.BPC1_col_a_m1	BPC1	Maize	130	153	-	27.1515	4.62e-10	2.92e-05	AGGAGAGGGAGAGGGAGAGAGAGC
773	BBRBPC_tnt.BPC1_col_a_m1	BPC1	Maize	128	151	-	24.8333	1.73e-09	5.48e-05	GAGAGGGAGAGGGAGAGAGAGCTA
774	BBRBPC_tnt.BPC5_colamp_a_m1	BPC5	Maize	131	159	-	22.1341	7.6e-09	0.000161	CTAGAGAGGAGAGGGAGAGGGAGAGAGAG
775	ND_tnt.FRS9_col_a_m1	FRS9	Maize	133	153	+	22.4697	1.47e-08	0.000188	CTCTCTCCCTCTCCCTCTCCT
776	BBRBPC_tnt.BPC5_colamp_a_m1	BPC5	Maize	129	157	-	17.939	5.34e-08	0.000483	AGAGAGGAGAGGGAGAGGGAGAGAGAGCT
777	C2H2_tnt.TF3A_col_a_m1	TF3A	Maize	214	232	-	20.52	5.58e-08	0.000703	TCGCCTCTTCCTCATCCTC
778	C2H2_tnt.TF3A_col_a_m1	TF3A	Maize	211	229	-	20.32	6.55e-08	0.000703	CCTCTTCCTCATCCTCCAA
779	C2C2dof_tnt.At4g38000_col_a_m1	At4g38000	Maize	3453	3480	-	19.4091	1.13e-07	0.000714	TTTTTCCTGTTTCTTTCTAAACTTTTTG
780	BBRBPC_tnt.BPC1_col_a_m1	BPC1	Maize	132	155	-	15.803	1.54e-07	0.00112	AGAGGAGAGGGAGAGGGAGAGAGA
781	BBRBPC_tnt.BPC5_col_a_m1	BPC5	Maize	123	152	-	-15.3947	1.78e-07	0.00241	GGAGAGGGAGAGGGAGAGAGAGCTATTGTT
782	ND_tnt.FRS9_col_a_m1	FRS9	Maize	129	149	+	17.803	1.94e-07	0.00111	AGCTCTCTCTCCCTCTCCCTC
783	BBRBPC_tnt.BPC5_col_a_m1	BPC5	Maize	125	154	-	-16.0132	2.01e-07	0.00241	GAGGAGAGGGAGAGGGAGAGAGAGCTATTG
784	ABI3VP1_tnt.VRN1_col_a_m1	VRN1	Maize	519	547	-	7.35821	2.31e-07	0.000465	TGGGTATTAATTTTTTTTTGTTTATTAGT
785	C2H2_tnt.TF3A_col_a_m1	TF3A	Maize	190	208	-	18.584	2.41e-07	0.00173	CCGACTCTTCCTCATCCTC
786	C2C2dof_tnt.AT1G69570_col_a_m1	AT1G69570	Maize	1411	1437	+	18.4545	2.59e-07	0.00276	TTTTTTCTTTTGGTTCTCCTTTTTCAT
787	Trihelix_tnt.AT3G58630_col_a_m1	AT3G58630	Maize	2876	2890	+	17.8636	2.84e-07	0.00315	CGATCTCCGGCGAGG
788	Trihelix_tnt.AT5G05550_colamp_a_m1	AT5G05550	Maize	2877	2891	+	17.7121	2.91e-07	0.00323	GATCTCCGGCGAGGT
789	ND_tnt.FRS9_col_a_m1	FRS9	Maize	125	145	+	16.8636	3.09e-07	0.00129	CAATAGCTCTCTCTCCCTCTC
790	Trihelix_tnt.AT3G58630_colamp_a_m1	AT3G58630	Maize	2876	2890	+	17.5909	3.36e-07	0.00373	CGATCTCCGGCGAGG
791	C2C2dof_tnt.At4g38000_col_a_m1	At4g38000	Maize	1408	1435	+	18.0606	3.6e-07	0.00125	TGGTTTTTTCTTTTGGTTCTCCTTTTTC
792	BBRBPC_tnt.BPC1_col_a_m1	BPC1	Maize	126	149	-	12.9394	5.27e-07	0.00205	GAGGGAGAGGGAGAGAGAGCTATT
793	ND_tnt.FRS9_col_a_m1	FRS9	Maize	135	155	+	15.7273	5.35e-07	0.0018	CTCTCCCTCTCCCTCTCCTCT
794	Trihelix_tnt.At3g14180_col_m1	At3g14180	Maize	2878	2888	-	17.4848	5.41e-07	0.00602	TCGCCGGAGAT
795	REM_tnt.REM19_colamp_a_m1	REM19	Maize	522	542	+	17.2388	7.01e-07	0.00251	AATAAACAAAAAAAAATTAAT
796	C2H2_tnt.TF3A_col_a_m1	TF3A	Maize	187	205	-	16.936	7.78e-07	0.00456	ACTCTTCCTCATCCTCCAT
797	ND_tnt.FRS9_col_a_m1	FRS9	Maize	137	157	+	14.6212	8.94e-07	0.00272	CTCCCTCTCCCTCTCCTCTCT
798	Trihelix_tnt.AT5G05550_col_a_m1	AT5G05550	Maize	2877	2891	+	16.5909	8.95e-07	0.00994	GATCTCCGGCGAGGT
799	BBRBPC_tnt.BPC5_colamp_a_m1	BPC5	Maize	125	153	-	10.4756	9.98e-07	0.00301	AGGAGAGGGAGAGGGAGAGAGAGCTATTG
800	BBRBPC_tnt.BPC1_colamp_a_m1	BPC1	Maize	133	147	+	16.0455	1.17e-06	0.00791	CTCTCTCCCTCTCCC
801	ABI3VP1_tnt.VRN1_col_a_m1	VRN1	Maize	3572	3600	-	0.940299	1.35e-06	0.00138	TATGTTTCATTTGTTATTTTGTTTTGTAA
802	C2H2_tnt.TF3A_col_a_m1	TF3A	Maize	208	226	-	16.008	1.44e-06	0.00774	CTTCCTCATCCTCCAACCC
803	BBRBPC_tnt.BPC5_col_a_m1	BPC5	Maize	127	156	-	-26.6579	1.88e-06	0.00864	GAGAGGAGAGGGAGAGGGAGAGAGAGCTAT
804	BBRBPC_tnt.BPC1_colamp_a_m1	BPC1	Maize	135	149	+	15.0303	1.92e-06	0.00951	CTCTCCCTCTCCCTC
805	ABI3VP1_tnt.VRN1_colamp_a_m1	VRN1	Maize	524	542	-	15.5139	1.92e-06	0.00687	ATTAATTTTTTTTTGTTTA
806	C2C2dof_tnt.OBP3_colamp_a_m1	OBP3	Maize	1405	1423	+	15.0606	2.03e-06	0.0253	TTTTGGTTTTTTCTTTTGG
807	REM_tnt.REM19_colamp_a_m1	REM19	Maize	520	540	+	15.3433	2.06e-06	0.00324	CTAATAAACAAAAAAAAATTA
808	ABI3VP1_tnt.VRN1_col_a_m1	VRN1	Maize	1396	1424	+	-0.850746	2.13e-06	0.00195	CGCTAAGCGTTTTGGTTTTTTCTTTTGGT
809	C2H2_tnt.TF3A_col_a_m1	TF3A	Maize	136	154	+	15.216	2.41e-06	0.0119	TCTCCCTCTCCCTCTCCTC
810	C2C2dof_tnt.OBP3_col_a_m1	OBP3	Maize	1413	1433	+	15.5455	2.48e-06	0.00733	TTTTCTTTTGGTTCTCCTTTT
811	ABI3VP1_tnt.VRN1_col_a_m1	VRN1	Maize	523	551	-	-1.49254	2.5e-06	0.00219	GGTTTGGGTATTAATTTTTTTTTGTTTAT
812	ABI3VP1_tnt.VRN1_col_a_m1	VRN1	Maize	518	546	-	-1.85075	2.73e-06	0.00227	GGGTATTAATTTTTTTTTGTTTATTAGTT
813	C2C2dof_tnt.OBP3_colamp_a_m1	OBP3	Maize	3453	3471	-	14.7121	3e-06	0.0253	TTTCTTTCTAAACTTTTTG
814	C2C2dof_tnt.AT5G66940_col_a_m1	AT5G66940	Maize	1413	1441	+	15.1515	3.41e-06	0.0109	TTTTCTTTTGGTTCTCCTTTTTCATACGT
815	BBRBPC_tnt.BPC1_colamp_a_m1	BPC1	Maize	129	143	+	13.697	3.66e-06	0.0148	AGCTCTCTCTCCCTC
816	REM_tnt.REM19_colamp_a_m1	REM19	Maize	521	541	+	14.2239	3.74e-06	0.00462	TAATAAACAAAAAAAAATTAA
817	ABI3VP1_tnt.VRN1_col_a_m1	VRN1	Maize	522	550	-	-3.19403	3.79e-06	0.00276	GTTTGGGTATTAATTTTTTTTTGTTTATT
818	ABI3VP1_tnt.VRN1_colamp_a_m1	VRN1	Maize	3318	3336	+	14.0278	3.81e-06	0.0105	TTCCGTTTTTTTTTGGTGT
819	C2C2dof_tnt.OBP3_colamp_a_m1	OBP3	Maize	1417	1435	+	14.3788	4.29e-06	0.0253	CTTTTGGTTCTCCTTTTTC
820	BBRBPC_tnt.BPC1_col_a_m1	BPC1	Maize	134	157	-	7.33333	4.65e-06	0.00893	AGAGAGGAGAGGGAGAGGGAGAGA
821	ABI3VP1_tnt.VRN1_col_a_m1	VRN1	Maize	3571	3599	-	-4.62687	5.33e-06	0.00363	ATGTTTCATTTGTTATTTTGTTTTGTAAT
822	ABI3VP1_tnt.VRN1_col_a_m1	VRN1	Maize	1397	1425	+	-5.0597	5.9e-06	0.00384	GCTAAGCGTTTTGGTTTTTTCTTTTGGTT
823	REM_tnt.REM19_col_a_m1	REM19	Maize	3917	3931	+	14.5373	5.91e-06	0.0103	AACAAACAAATATAA
824	ABI3VP1_tnt.VRN1_col_a_m1	VRN1	Maize	525	553	-	-5.07463	5.92e-06	0.00384	TAGGTTTGGGTATTAATTTTTTTTTGTTT
825	REM_tnt.REM19_colamp_a_m1	REM19	Maize	3571	3591	+	13.3134	5.93e-06	0.00587	ATTACAAAACAAAATAACAAA
826	ABI3VP1_tnt.VRN1_colamp_a_m1	VRN1	Maize	523	541	-	12.7083	6.68e-06	0.0119	TTAATTTTTTTTTGTTTAT
827	BBRBPC_tnt.BPC1_col_a_m1	BPC1	Maize	760	783	-	6.31818	6.7e-06	0.00979	ATGTGAGAGAGAAGAGGATAGATT
828	ABI3VP1_tnt.VRN1_col_a_m1	VRN1	Maize	3914	3942	-	-5.8209	7.03e-06	0.00417	CTAGTAATATGTTATATTTGTTTGTTTTA
829	C2C2dof_tnt.OBP3_col_a_m1	OBP3	Maize	521	541	-	14.1515	7.05e-06	0.0121	TTAATTTTTTTTTGTTTATTA
830	BBRBPC_tnt.BPC1_colamp_a_m1	BPC1	Maize	131	145	+	12.2273	7.05e-06	0.0198	CTCTCTCTCCCTCTC
831	REM_tnt.REM19_colamp_a_m1	REM19	Maize	1407	1427	-	12.9552	7.08e-06	0.00655	AGAACCAAAAGAAAAAACCAA
832	C2C2dof_tnt.AT5G66940_col_a_m1	AT5G66940	Maize	3456	3484	-	14.0606	7.33e-06	0.0173	CTTGTTTTTCCTGTTTCTTTCTAAACTTT
833	C2H2_tnt.TF3A_col_a_m1	TF3A	Maize	131	149	+	13.376	7.48e-06	0.0201	CTCTCTCTCCCTCTCCCTC
834	ND_tnt.FRS9_col_a_m1	FRS9	Maize	763	783	+	9.54545	7.52e-06	0.0123	CTATCCTCTTCTCTCTCACAT
835	BBRBPC_tnt.BPC5_col_a_m1	BPC5	Maize	119	148	-	-34.3158	7.72e-06	0.0164	AGGGAGAGGGAGAGAGAGCTATTGTTGCCA
836	ABI3VP1_tnt.VRN1_colamp_a_m1	VRN1	Maize	3320	3338	+	12.3333	7.77e-06	0.0128	CCGTTTTTTTTTGGTGTGT
837	C2H2_tnt.TF3A_col_a_m1	TF3A	Maize	217	235	-	13.216	8.22e-06	0.0204	CAGTCGCCTCTTCCTCATC
838	BBRBPC_tnt.BPC1_colamp_a_m1	BPC1	Maize	139	153	+	11.8333	8.29e-06	0.0223	CCCTCTCCCTCTCCT
839	ABI3VP1_tnt.VRN1_col_a_m1	VRN1	Maize	3570	3598	-	-6.73134	8.66e-06	0.00478	TGTTTCATTTGTTATTTTGTTTTGTAATG
840	BBRBPC_tnt.BPC5_col_a_m1	BPC5	Maize	129	158	-	-34.9868	8.69e-06	0.0164	TAGAGAGGAGAGGGAGAGGGAGAGAGAGCT
841	BBRBPC_tnt.BPC5_col_a_m1	BPC5	Maize	3234	3263	-	-35.0132	8.73e-06	0.0164	GGAGTTTTTGCAACAAAGAGAGACTGAGCG
842	C2C2dof_tnt.OBP3_colamp_a_m1	OBP3	Maize	3462	3480	-	13.6364	9.08e-06	0.0303	TTTTTCCTGTTTCTTTCTA
843	ABI3VP1_tnt.VRN1_colamp_a_m1	VRN1	Maize	1404	1422	+	11.8611	9.37e-06	0.0137	GTTTTGGTTTTTTCTTTTG
844	BBRBPC_tnt.BPC5_col_a_m1	BPC5	Maize	121	150	-	-35.6184	9.79e-06	0.0167	AGAGGGAGAGGGAGAGAGAGCTATTGTTGC
845	REM_tnt.REM19_col_a_m1	REM19	Maize	3321	3335	-	13.6716	9.97e-06	0.0142	CACCAAAAAAAAACG
846	ABI3VP1_tnt.VRN1_col_a_m1	VRN1	Maize	1404	1432	+	-7.85075	1.11e-05	0.00534	GTTTTGGTTTTTTCTTTTGGTTCTCCTTT
847	ABI3VP1_tnt.VRN1_colamp_a_m1	VRN1	Maize	521	539	-	11.3889	1.12e-05	0.0142	AATTTTTTTTTGTTTATTA
848	REM_tnt.REM19_col_a_m1	REM19	Maize	3320	3334	-	13.403	1.17e-05	0.0149	ACCAAAAAAAAACGG
849	ABI3VP1_tnt.VRN1_colamp_a_m1	VRN1	Maize	520	538	-	11.1389	1.23e-05	0.0148	ATTTTTTTTTGTTTATTAG
850	ABI3VP1_tnt.VRN1_colamp_a_m1	VRN1	Maize	1405	1423	+	11.125	1.24e-05	0.0148	TTTTGGTTTTTTCTTTTGG
851	REM_tnt.REM19_colamp_a_m1	REM19	Maize	3911	3931	+	11.7612	1.25e-05	0.00875	AATTAAAACAAACAAATATAA
852	ND_tnt.FRS9_col_a_m1	FRS9	Maize	761	781	+	8.19697	1.25e-05	0.0182	ATCTATCCTCTTCTCTCTCAC
853	BBRBPC_tnt.BPC1_col_a_m1	BPC1	Maize	136	159	-	4.34848	1.33e-05	0.0147	CTAGAGAGGAGAGGGAGAGGGAGA
854	C2H2_tnt.TF3A_col_a_m1	TF3A	Maize	1685	1703	+	12.384	1.33e-05	0.0286	CTGCGGCCTCCTCTGCCTC
855	ND_tnt.FRS9_col_a_m1	FRS9	Maize	127	147	+	7.95455	1.37e-05	0.0188	ATAGCTCTCTCTCCCTCTCCC
856	REM_tnt.REM19_col_a_m1	REM19	Maize	2293	2307	-	13.0597	1.42e-05	0.0159	GAGAGAAAAAAGACA
857	ND_tnt.FRS9_col_a_m1	FRS9	Maize	123	143	+	7.78788	1.46e-05	0.0194	AACAATAGCTCTCTCTCCCTC
858	C2C2dof_tnt.At4g38000_col_a_m1	At4g38000	Maize	3906	3933	-	12.8333	1.49e-05	0.0131	TGTTATATTTGTTTGTTTTAATTTTACA
859	C2C2dof_tnt.AT1G69570_col_a_m1	AT1G69570	Maize	473	499	-	12.7576	1.53e-05	0.0333	ATGTTTCTTTTGCCAAATTTTGTTTAT
860	C2C2dof_tnt.At4g38000_col_a_m1	At4g38000	Maize	458	485	-	12.7879	1.53e-05	0.0133	AAATTTTGTTTATTTTTCCTCCATTTTA
861	C2C2dof_tnt.OBP3_col_a_m1	OBP3	Maize	2292	2312	+	12.9848	1.56e-05	0.0202	TTGTCTTTTTTCTCTCCTCTG
862	C2C2dof_tnt.AT1G69570_col_a_m1	AT1G69570	Maize	736	762	-	12.7121	1.57e-05	0.0333	ATTGGTCTTTTTCTCTTGTTTCTCAAA
863	C2C2dof_tnt.AT5G66940_col_a_m1	AT5G66940	Maize	1401	1429	+	12.8788	1.58e-05	0.0315	AGCGTTTTGGTTTTTTCTTTTGGTTCTCC
864	BBRBPC_tnt.BPC1_col_a_m1	BPC1	Maize	758	781	-	3.80303	1.59e-05	0.0156	GTGAGAGAGAAGAGGATAGATTGG
865	REM_tnt.REM19_col_a_m1	REM19	Maize	468	482	+	12.8358	1.61e-05	0.0165	GAAAAATAAACAAAA
866	C2C2dof_tnt.OBP3_col_a_m1	OBP3	Maize	2687	2707	-	12.9242	1.62e-05	0.0202	CTAGCTTTTAATGTTTTCTTG
867	ABI3VP1_tnt.VRN1_col_a_m1	VRN1	Maize	516	544	-	-9.59701	1.64e-05	0.0067	GTATTAATTTTTTTTTGTTTATTAGTTGC
868	ABI3VP1_tnt.VRN1_col_a_m1	VRN1	Maize	524	552	-	-9.71642	1.68e-05	0.00673	AGGTTTGGGTATTAATTTTTTTTTGTTTA
869	C2H2_tnt.TF3A_col_a_m1	TF3A	Maize	134	152	+	11.928	1.73e-05	0.0317	TCTCTCCCTCTCCCTCTCC
870	REM_tnt.REM19_colamp_a_m1	REM19	Maize	3317	3337	-	11.0448	1.74e-05	0.0106	CACACCAAAAAAAAACGGAAG
871	BBRBPC_tnt.BPC5_colamp_a_m1	BPC5	Maize	127	155	-	1.34146	1.8e-05	0.0165	AGAGGAGAGGGAGAGGGAGAGAGAGCTAT
872	REM_tnt.REM19_colamp_a_m1	REM19	Maize	1404	1424	-	10.9403	1.82e-05	0.0107	ACCAAAAGAAAAAACCAAAAC
873	ABI3VP1_tnt.VRN1_col_a_m1	VRN1	Maize	3576	3604	-	-10.209	1.87e-05	0.00718	GGAGTATGTTTCATTTGTTATTTTGTTTT
874	ABI3VP1_tnt.VRN1_colamp_a_m1	VRN1	Maize	1128	1146	+	10	1.87e-05	0.0183	CACCTTGTTTTTTTTACTG
875	C2C2dof_tnt.OBP3_colamp_a_m1	OBP3	Maize	2284	2302	+	12.8485	1.88e-05	0.0452	TCTTGTCCTTGTCTTTTTT
876	ABI3VP1_tnt.VRN1_colamp_a_m1	VRN1	Maize	3319	3337	+	9.94444	1.91e-05	0.0183	TCCGTTTTTTTTTGGTGTG
877	ABI3VP1_tnt.VRN1_col_a_m1	VRN1	Maize	1399	1427	+	-10.3284	1.91e-05	0.00723	TAAGCGTTTTGGTTTTTTCTTTTGGTTCT
878	ABI3VP1_tnt.VRN1_col_a_m1	VRN1	Maize	1410	1438	+	-10.3284	1.91e-05	0.00723	GTTTTTTCTTTTGGTTCTCCTTTTTCATA
879	C2H2_tnt.TF3A_col_a_m1	TF3A	Maize	133	151	+	11.72	1.94e-05	0.0317	CTCTCTCCCTCTCCCTCTC
880	ABI3VP1_tnt.VRN1_col_a_m1	VRN1	Maize	515	543	-	-10.7164	2.08e-05	0.00771	TATTAATTTTTTTTTGTTTATTAGTTGCT
881	REM_tnt.REM19_col_a_m1	REM19	Maize	523	537	+	12.2388	2.21e-05	0.019	ATAAACAAAAAAAAA
882	ND_tnt.FRS9_col_a_m1	FRS9	Maize	3236	3256	+	6.62121	2.22e-05	0.0237	CTCAGTCTCTCTTTGTTGCAA
883	BBRBPC_tnt.BPC5_col_a_m1	BPC5	Maize	199	228	+	-40.3684	2.24e-05	0.0263	GAAGAGTCGGGGTTGGAGGATGAGGAAGAG
884	BBRBPC_tnt.BPC1_colamp_a_m1	BPC1	Maize	2218	2232	+	9.34848	2.3e-05	0.0345	CCTTCTCTATCTCCA
885	ABI3VP1_tnt.VRN1_colamp_a_m1	VRN1	Maize	522	540	-	9.34722	2.35e-05	0.0201	TAATTTTTTTTTGTTTATT
886	ABI3VP1_tnt.VRN1_colamp_a_m1	VRN1	Maize	3469	3487	-	9.33333	2.36e-05	0.0201	CAGCTTGTTTTTCCTGTTT
887	BBRBPC_tnt.BPC1_col_a_m1	BPC1	Maize	124	147	-	2.60606	2.37e-05	0.0181	GGGAGAGGGAGAGAGAGCTATTGT
888	ABI3VP1_tnt.VRN1_col_a_m1	VRN1	Maize	1411	1439	+	-11.4328	2.42e-05	0.00855	TTTTTTCTTTTGGTTCTCCTTTTTCATAC
889	ABI3VP1_tnt.VRN1_col_a_m1	VRN1	Maize	521	549	-	-11.6567	2.54e-05	0.00883	TTTGGGTATTAATTTTTTTTTGTTTATTA
890	ABI3VP1_tnt.VRN1_colamp_a_m1	VRN1	Maize	3317	3335	+	9.11111	2.55e-05	0.0207	CTTCCGTTTTTTTTTGGTG
891	REM_tnt.REM19_colamp_a_m1	REM19	Maize	518	538	+	10.1194	2.62e-05	0.0139	AACTAATAAACAAAAAAAAAT
892	BBRBPC_tnt.BPC1_colamp_a_m1	BPC1	Maize	3238	3252	+	8.93939	2.67e-05	0.037	CAGTCTCTCTTTGTT
893	C2C2dof_tnt.At4g38000_col_a_m1	At4g38000	Maize	1407	1434	+	11.8333	2.7e-05	0.017	TTGGTTTTTTCTTTTGGTTCTCCTTTTT
894	BBRBPC_tnt.BPC1_colamp_a_m1	BPC1	Maize	137	151	+	8.90909	2.7e-05	0.037	CTCCCTCTCCCTCTC
895	ABI3VP1_tnt.VRN1_col_a_m1	VRN1	Maize	3463	3491	-	-11.9701	2.71e-05	0.00917	TTGGCAGCTTGTTTTTCCTGTTTCTTTCT
896	BBRBPC_tnt.BPC1_colamp_a_m1	BPC1	Maize	765	779	+	8.63636	3.01e-05	0.0395	ATCCTCTTCTCTCTC
897	C2H2_tnt.TF3A_col_a_m1	TF3A	Maize	184	202	-	10.896	3.05e-05	0.0389	CTTCCTCATCCTCCATGTG
898	C2C2dof_tnt.AT5G66940_col_a_m1	AT5G66940	Maize	3447	3475	-	11.6515	3.28e-05	0.0436	CCTGTTTCTTTCTAAACTTTTTGCTAGTC
899	ABI3VP1_tnt.VRN1_colamp_a_m1	VRN1	Maize	3322	3340	+	8.31944	3.32e-05	0.0226	GTTTTTTTTTGGTGTGTGC
900	ABI3VP1_tnt.VRN1_colamp_a_m1	VRN1	Maize	1408	1426	+	8.19444	3.46e-05	0.0232	TGGTTTTTTCTTTTGGTTC
901	BBRBPC_tnt.BPC5_colamp_a_m1	BPC5	Maize	1580	1608	+	-1.17073	3.6e-05	0.0243	GCCAAAGAAATATTTCGAGAGAGGTGGAG
902	BBRBPC_tnt.BPC5_col_a_m1	BPC5	Maize	131	160	-	-43.2763	3.77e-05	0.0356	TCTAGAGAGGAGAGGGAGAGGGAGAGAGAG
903	ABI3VP1_tnt.VRN1_col_a_m1	VRN1	Maize	1405	1433	+	-13.6269	3.81e-05	0.0113	TTTTGGTTTTTTCTTTTGGTTCTCCTTTT
904	BBRBPC_tnt.BPC5_col_a_m1	BPC5	Maize	1301	1330	+	-43.3553	3.82e-05	0.0356	GGAGGATGTCAGGAAGACGGAGGGATTCAA
905	REM_tnt.REM19_col_a_m1	REM19	Maize	465	479	+	11.1343	3.89e-05	0.0264	GAGGAAAAATAAACA
906	C2H2_tnt.TF3A_col_a_m1	TF3A	Maize	196	214	-	10.4	3.99e-05	0.0395	CCAACCCCGACTCTTCCTC
907	REM_tnt.REM19_col_a_m1	REM19	Maize	3322	3336	-	11.0149	4.12e-05	0.0275	ACACCAAAAAAAAAC
908	C2C2dof_tnt.At4g38000_col_a_m1	At4g38000	Maize	3325	3352	+	11.0606	4.17e-05	0.0222	TTTTTTTGGTGTGTGCTACTACCTTTTT
909	BBRBPC_tnt.BPC5_colamp_a_m1	BPC5	Maize	1294	1322	+	-1.7439	4.2e-05	0.0263	AAGGAGGGGAGGATGTCAGGAAGACGGAG
910	BBRBPC_tnt.BPC1_col_a_m1	BPC1	Maize	1771	1794	-	0.742424	4.28e-05	0.0275	TAGAGACAGTGTGGTAGAAGCAGG
911	BBRBPC_tnt.BPC1_col_a_m1	BPC1	Maize	3223	3246	-	0.727273	4.3e-05	0.0275	GAGAGACTGAGCGGAGGATCAACA
912	C2C2dof_tnt.OBP3_col_a_m1	OBP3	Maize	457	477	-	11.3333	4.31e-05	0.0347	TTTATTTTTCCTCCATTTTAG
913	BBRBPC_tnt.BPC1_colamp_a_m1	BPC1	Maize	2216	2230	+	7.62121	4.35e-05	0.0484	TGCCTTCTCTATCTC
914	C2C2dof_tnt.AT5G66940_col_a_m1	AT5G66940	Maize	2280	2308	+	11.1364	4.38e-05	0.0466	CGTCTCTTGTCCTTGTCTTTTTTCTCTCC
915	ABI3VP1_tnt.VRN1_col_a_m1	VRN1	Maize	3908	3936	-	-14.4179	4.47e-05	0.0126	ATATGTTATATTTGTTTGTTTTAATTTTA
916	REM_tnt.REM19_colamp_a_m1	REM19	Maize	3915	3935	+	8.86567	4.48e-05	0.0198	AAAACAAACAAATATAACATA
917	ABI3VP1_tnt.VRN1_col_a_m1	VRN1	Maize	526	554	-	-14.4328	4.48e-05	0.0126	ATAGGTTTGGGTATTAATTTTTTTTTGTT
918	BBRBPC_tnt.BPC5_colamp_a_m1	BPC5	Maize	3452	3480	+	-2.12195	4.64e-05	0.0277	GCAAAAAGTTTAGAAAGAAACAGGAAAAA
919	C2C2dof_tnt.At4g38000_col_a_m1	At4g38000	Maize	3326	3353	+	10.7879	4.84e-05	0.0245	TTTTTTGGTGTGTGCTACTACCTTTTTT
920	REM_tnt.REM19_col_a_m1	REM19	Maize	1407	1421	-	10.6716	4.84e-05	0.0296	AAAAGAAAAAACCAA
921	REM_tnt.REM19_colamp_a_m1	REM19	Maize	3573	3593	+	8.55224	5.1e-05	0.0214	TACAAAACAAAATAACAAATG
922	REM_tnt.REM19_col_a_m1	REM19	Maize	524	538	+	10.5522	5.11e-05	0.0304	TAAACAAAAAAAAAT
923	ABI3VP1_tnt.VRN1_colamp_a_m1	VRN1	Maize	1403	1421	+	6.95833	5.13e-05	0.0285	CGTTTTGGTTTTTTCTTTT
924	ABI3VP1_tnt.VRN1_colamp_a_m1	VRN1	Maize	3413	3431	+	6.91667	5.19e-05	0.0286	TGGCATTTTTTTTGTCGCT
925	C2H2_tnt.TF3A_col_a_m1	TF3A	Maize	205	223	-	9.896	5.2e-05	0.0427	CCTCATCCTCCAACCCCGA
926	C2C2dof_tnt.At4g38000_col_a_m1	At4g38000	Maize	2275	2302	+	10.5909	5.38e-05	0.0262	GGTTTCGTCTCTTGTCCTTGTCTTTTTT
927	BBRBPC_tnt.BPC5_colamp_a_m1	BPC5	Maize	2216	2244	-	-2.69512	5.38e-05	0.0296	TGGAGAAGAACCTGGAGATAGAGAAGGCA
928	REM_tnt.REM19_colamp_a_m1	REM19	Maize	741	761	+	8.40299	5.42e-05	0.0222	GAAACAAGAGAAAAAGACCAA
929	REM_tnt.REM19_col_a_m1	REM19	Maize	3915	3929	+	10.4179	5.44e-05	0.0315	AAAACAAACAAATAT
930	ABI3VP1_tnt.VRN1_colamp_a_m1	VRN1	Maize	3321	3339	+	6.73611	5.49e-05	0.0295	CGTTTTTTTTTGGTGTGTG
931	C2H2_tnt.TF3A_col_a_m1	TF3A	Maize	220	238	-	9.76	5.58e-05	0.0449	TCACAGTCGCCTCTTCCTC
932	ABI3VP1_tnt.VRN1_colamp_a_m1	VRN1	Maize	2291	2309	+	6.66667	5.61e-05	0.0299	CTTGTCTTTTTTCTCTCCT
933	ABI3VP1_tnt.VRN1_col_a_m1	VRN1	Maize	3909	3937	-	-15.6119	5.66e-05	0.0148	AATATGTTATATTTGTTTGTTTTAATTTT
934	ABI3VP1_tnt.VRN1_colamp_a_m1	VRN1	Maize	702	720	-	6.61111	5.71e-05	0.0299	ATGGATGTTTTTTTGTATT
935	C2H2_tnt.TF3A_col_a_m1	TF3A	Maize	139	157	+	9.664	5.86e-05	0.0455	CCCTCTCCCTCTCCTCTCT
936	REM_tnt.REM19_col_a_m1	REM19	Maize	3576	3590	+	10.2388	5.92e-05	0.0324	AAAACAAAATAACAA
937	REM_tnt.REM19_col_a_m1	REM19	Maize	1130	1144	-	10.194	6.05e-05	0.0324	GTAAAAAAAACAAGG
938	C2C2dof_tnt.OBP3_col_a_m1	OBP3	Maize	3464	3484	-	10.7273	6.07e-05	0.0388	CTTGTTTTTCCTGTTTCTTTC
939	C2C2dof_tnt.OBP3_col_a_m1	OBP3	Maize	518	538	-	10.7121	6.12e-05	0.0388	ATTTTTTTTTGTTTATTAGTT
940	BBRBPC_tnt.BPC5_colamp_a_m1	BPC5	Maize	2610	2638	-	-3.21951	6.16e-05	0.0319	AAGAGCTGAGCTGACAGAGAACAAGAGAG
941	BBRBPC_tnt.BPC1_col_a_m1	BPC1	Maize	122	145	-	-0.454545	6.18e-05	0.0345	GAGAGGGAGAGAGAGCTATTGTTG
942	ABI3VP1_tnt.VRN1_col_a_m1	VRN1	Maize	464	492	-	-16.0746	6.2e-05	0.0156	TTTTGCCAAATTTTGTTTATTTTTCCTCC
943	BBRBPC_tnt.BPC5_col_a_m1	BPC5	Maize	1766	1795	-	-46.5132	6.21e-05	0.0482	GTAGAGACAGTGTGGTAGAAGCAGGCAGCA
944	ABI3VP1_tnt.VRN1_col_a_m1	VRN1	Maize	3903	3931	-	-16.2985	6.48e-05	0.016	TTATATTTGTTTGTTTTAATTTTACAGTC
945	C2H2_tnt.TF3A_col_a_m1	TF3A	Maize	193	211	-	9.44	6.58e-05	0.0499	ACCCCGACTCTTCCTCATC
946	ABI3VP1_tnt.VRN1_colamp_a_m1	VRN1	Maize	1407	1425	+	6.06944	6.72e-05	0.0321	TTGGTTTTTTCTTTTGGTT
947	ABI3VP1_tnt.VRN1_colamp_a_m1	VRN1	Maize	3414	3432	+	6.04167	6.78e-05	0.0321	GGCATTTTTTTTGTCGCTA
948	REM_tnt.REM19_col_a_m1	REM19	Maize	3413	3427	-	9.91045	6.89e-05	0.0354	ACAAAAAAAATGCCA
949	C2C2dof_tnt.At4g38000_col_a_m1	At4g38000	Maize	3704	3731	+	10.1061	6.95e-05	0.0294	CATTTTAATTCCATAAATTAACATTATA
950	BBRBPC_tnt.BPC1_col_a_m1	BPC1	Maize	687	710	+	-0.863636	6.99e-05	0.0372	CAGGAAAGGAGAGGGAATACAAAA
951	REM_tnt.REM19_col_a_m1	REM19	Maize	1409	1423	-	9.86567	7.03e-05	0.0359	CCAAAAGAAAAAACC
952	BBRBPC_tnt.BPC1_col_a_m1	BPC1	Maize	3229	3252	-	-0.909091	7.09e-05	0.0373	AACAAAGAGAGACTGAGCGGAGGA
953	ABI3VP1_tnt.VRN1_col_a_m1	VRN1	Maize	3872	3900	-	-16.7761	7.11e-05	0.017	GTTGTTCATGTTGCTATCTGTTTATTTTC
954	REM_tnt.REM19_colamp_a_m1	REM19	Maize	463	483	+	7.71642	7.14e-05	0.0266	TGGAGGAAAAATAAACAAAAT
955	REM_tnt.REM19_colamp_a_m1	REM19	Maize	523	543	+	7.68657	7.23e-05	0.0266	ATAAACAAAAAAAAATTAATA
956	BBRBPC_tnt.BPC1_col_a_m1	BPC1	Maize	3462	3485	+	-1.04545	7.38e-05	0.038	TAGAAAGAAACAGGAAAAACAAGC
957	BBRBPC_tnt.BPC5_colamp_a_m1	BPC5	Maize	683	711	+	-4.0122	7.54e-05	0.0359	TGACCAGGAAAGGAGAGGGAATACAAAAA
958	REM_tnt.REM19_colamp_a_m1	REM19	Maize	1406	1426	-	7.53731	7.67e-05	0.0276	GAACCAAAAGAAAAAACCAAA
959	REM_tnt.REM19_col_a_m1	REM19	Maize	2315	2329	+	9.67164	7.67e-05	0.038	GCGAAACAAACAAAG
960	REM_tnt.REM19_colamp_a_m1	REM19	Maize	3320	3340	-	7.46269	7.9e-05	0.0278	GCACACACCAAAAAAAAACGG
961	REM_tnt.REM19_colamp_a_m1	REM19	Maize	517	537	+	7.35821	8.23e-05	0.0281	CAACTAATAAACAAAAAAAAA
962	REM_tnt.REM19_col_a_m1	REM19	Maize	3323	3337	-	9.50746	8.24e-05	0.0399	CACACCAAAAAAAAA
963	C2C2dof_tnt.At4g38000_col_a_m1	At4g38000	Maize	447	474	-	9.77273	8.25e-05	0.0331	ATTTTTCCTCCATTTTAGCCACATTTTG
964	ABI3VP1_tnt.VRN1_col_a_m1	VRN1	Maize	3305	3333	+	-17.5672	8.27e-05	0.0185	TATCATCCATGCCTTCCGTTTTTTTTTGG
965	REM_tnt.REM19_colamp_a_m1	REM19	Maize	1411	1431	-	7.31343	8.37e-05	0.0281	AAGGAGAACCAAAAGAAAAAA
966	REM_tnt.REM19_colamp_a_m1	REM19	Maize	3572	3592	+	7.31343	8.37e-05	0.0281	TTACAAAACAAAATAACAAAT
967	C2C2dof_tnt.At4g38000_col_a_m1	At4g38000	Maize	456	483	-	9.71212	8.51e-05	0.0333	ATTTTGTTTATTTTTCCTCCATTTTAGC
968	C2C2dof_tnt.At4g38000_col_a_m1	At4g38000	Maize	467	494	-	9.71212	8.51e-05	0.0333	TCTTTTGCCAAATTTTGTTTATTTTTCC
969	REM_tnt.REM19_col_a_m1	REM19	Maize	3318	3332	-	9.43284	8.51e-05	0.0402	CAAAAAAAAACGGAA
970	BBRBPC_tnt.BPC5_colamp_a_m1	BPC5	Maize	135	163	-	-4.5122	8.55e-05	0.0387	CTTTCTAGAGAGGAGAGGGAGAGGGAGAG
971	ABI3VP1_tnt.VRN1_col_a_m1	VRN1	Maize	3907	3935	-	-17.7463	8.56e-05	0.0188	TATGTTATATTTGTTTGTTTTAATTTTAC
972	ABI3VP1_tnt.VRN1_col_a_m1	VRN1	Maize	512	540	-	-17.8507	8.73e-05	0.0189	TAATTTTTTTTTGTTTATTAGTTGCTAGG
973	REM_tnt.REM19_colamp_a_m1	REM19	Maize	525	545	+	7.19403	8.77e-05	0.029	AAACAAAAAAAAATTAATACC
974	ABI3VP1_tnt.VRN1_col_a_m1	VRN1	Maize	3309	3337	+	-17.9403	8.88e-05	0.0191	ATCCATGCCTTCCGTTTTTTTTTGGTGTG
975	BBRBPC_tnt.BPC5_colamp_a_m1	BPC5	Maize	133	161	-	-4.67073	8.89e-05	0.0398	TTCTAGAGAGGAGAGGGAGAGGGAGAGAG
976	C2C2dof_tnt.At4g38000_col_a_m1	At4g38000	Maize	3742	3769	-	9.54545	9.26e-05	0.035	ATGATTTCTATGATTAATCATCTTTTAT
977	ABI3VP1_tnt.VRN1_col_a_m1	VRN1	Maize	517	545	-	-18.1791	9.29e-05	0.0195	GGTATTAATTTTTTTTTGTTTATTAGTTG
978	ABI3VP1_tnt.VRN1_colamp_a_m1	VRN1	Maize	1400	1418	+	4.93056	9.39e-05	0.0399	AAGCGTTTTGGTTTTTTCT
979	ABI3VP1_tnt.VRN1_col_a_m1	VRN1	Maize	3573	3601	-	-18.3881	9.66e-05	0.0198	GTATGTTTCATTTGTTATTTTGTTTTGTA
980	C2C2dof_tnt.At4g38000_col_a_m1	At4g38000	Maize	1639	1666	+	9.43939	9.77e-05	0.0358	TTAATATTATCATTTATATTACATTTCC
981	ABI3VP1_tnt.VRN1_colamp_a_m1	VRN1	Maize	701	719	-	4.73611	9.93e-05	0.0402	TGGATGTTTTTTTGTATTC
982	BBRBPC_tnt.BPC1_col_a_m1	BPC1	Maize	2605	2628	-	-2.06061	9.96e-05	0.0438	CTGACAGAGAACAAGAGAGCTGTA
983	BBRBPC_tnt.BPC5_colamp_a_m1	BPC5	Maize	176	204	+	-5.13415	9.97e-05	0.0421	ACATGCTGCACATGGAGGATGAGGAAGAG
984	REM_tnt.REM19_colamp_a_m1	REM19	Sorghum	750	770	-	26	5.43e-10	3.5e-05	TTTACCAAAAAAAAAAAAAAT
985	ND_tnt.FRS9_col_a_m1	FRS9	Sorghum	1145	1165	+	26.9697	7.52e-10	2.4e-05	ACCTCTCTCTCTCTCTCCTTC
986	BBRBPC_tnt.BPC1_colamp_a_m1	BPC1	Sorghum	1147	1161	+	26.6667	7.85e-10	5.06e-05	CTCTCTCTCTCTCTC
987	ABI3VP1_tnt.VRN1_col_a_m1	VRN1	Sorghum	739	767	+	21.7463	1.73e-09	3.21e-05	TTAGTAGTTCTATTTTTTTTTTTTTTGGT
988	ND_tnt.FRS9_col_a_m1	FRS9	Sorghum	1147	1167	+	25.7273	1.82e-09	3.88e-05	CTCTCTCTCTCTCTCCTTCAT
989	REM_tnt.REM19_colamp_a_m1	REM19	Sorghum	749	769	-	24.6716	2.41e-09	7.75e-05	TTACCAAAAAAAAAAAAAATA
990	BBRBPC_tnt.BPC5_colamp_a_m1	BPC5	Sorghum	1147	1175	-	23.5976	3.62e-09	0.000115	GGCTACATATGAAGGAGAGAGAGAGAGAG
991	ABI3VP1_tnt.VRN1_col_a_m1	VRN1	Sorghum	737	765	+	17	1.03e-08	4.96e-05	TATTAGTAGTTCTATTTTTTTTTTTTTTG
992	ABI3VP1_tnt.VRN1_colamp_a_m1	VRN1	Sorghum	749	767	+	22.9722	1.22e-08	0.000788	TATTTTTTTTTTTTTTGGT
993	REM_tnt.REM19_colamp_a_m1	REM19	Sorghum	751	771	-	22.8955	1.3e-08	0.000278	TTTTACCAAAAAAAAAAAAAA
994	REM_tnt.REM19_col_a_m1	REM19	Sorghum	753	767	-	21.0299	1.83e-08	0.000782	ACCAAAAAAAAAAAA
995	REM_tnt.REM19_col_a_m1	REM19	Sorghum	751	765	-	20.7164	2.39e-08	0.000782	CAAAAAAAAAAAAAA
996	BBRBPC_tnt.BPC1_col_a_m1	BPC1	Sorghum	1144	1167	-	19.7879	2.41e-08	0.000508	ATGAAGGAGAGAGAGAGAGAGGTT
997	BBRBPC_tnt.BPC1_colamp_a_m1	BPC1	Sorghum	1149	1163	+	22.0303	3.22e-08	0.000692	CTCTCTCTCTCTCCT
998	Trihelix_tnt.AT3G58630_col_a_m1	AT3G58630	Sorghum	2921	2935	+	19.2273	3.52e-08	0.000739	CAATCTCCGGCGAGG
999	ABI3VP1_tnt.VRN1_col_a_m1	VRN1	Sorghum	742	770	+	12.9552	4.11e-08	0.000151	GTAGTTCTATTTTTTTTTTTTTTGGTAAA
1000	Trihelix_tnt.AT3G58630_colamp_a_m1	AT3G58630	Sorghum	2921	2935	+	18.9394	4.89e-08	0.00131	CAATCTCCGGCGAGG
1001	BBRBPC_tnt.BPC1_colamp_a_m1	BPC1	Sorghum	1145	1159	+	21.1515	5.86e-08	0.000945	ACCTCTCTCTCTCTC
1002	ND_tnt.FRS9_col_a_m1	FRS9	Sorghum	1143	1163	+	19.9394	6.28e-08	0.000574	TAACCTCTCTCTCTCTCTCCT
1003	Trihelix_tnt.AT5G05550_colamp_a_m1	AT5G05550	Sorghum	2922	2936	+	18.7424	6.44e-08	0.000859	AATCTCCGGCGAGGT
1004	REM_tnt.REM19_col_a_m1	REM19	Sorghum	752	766	-	19.7463	7.84e-08	0.00149	CCAAAAAAAAAAAAA
1005	REM_tnt.REM19_colamp_a_m1	REM19	Sorghum	4150	4170	-	20.4925	8.41e-08	0.000902	TTTTAAAAAAAAAATAAAATT
1006	ABI3VP1_tnt.VRN1_col_a_m1	VRN1	Sorghum	741	769	+	9.8209	1.11e-07	0.000287	AGTAGTTCTATTTTTTTTTTTTTTGGTAA
1007	ABI3VP1_tnt.VRN1_colamp_a_m1	VRN1	Sorghum	746	764	+	20.375	1.13e-07	0.00147	TTCTATTTTTTTTTTTTTT
1008	REM_tnt.REM19_col_a_m1	REM19	Sorghum	750	764	-	19.2239	1.46e-07	0.00159	AAAAAAAAAAAAAAT
1009	ABI3VP1_tnt.VRN1_colamp_a_m1	VRN1	Sorghum	750	768	+	20	1.46e-07	0.00151	ATTTTTTTTTTTTTTGGTA
1010	BBRBPC_tnt.BPC1_col_a_m1	BPC1	Sorghum	1146	1169	-	15.7273	1.59e-07	0.00112	ATATGAAGGAGAGAGAGAGAGAGG
1011	ABI3VP1_tnt.VRN1_colamp_a_m1	VRN1	Sorghum	748	766	+	19.8333	1.64e-07	0.00151	CTATTTTTTTTTTTTTTGG
1012	REM_tnt.REM19_col_a_m1	REM19	Sorghum	4152	4166	-	19.0299	1.92e-07	0.00179	AAAAAAAAAATAAAA
1013	REM_tnt.REM19_colamp_a_m1	REM19	Sorghum	748	768	-	19.2687	1.95e-07	0.00131	TACCAAAAAAAAAAAAAATAG
1014	ND_tnt.FRS9_col_a_m1	FRS9	Sorghum	1141	1161	+	17.7273	2.01e-07	0.00111	TATAACCTCTCTCTCTCTCTC
1015	Trihelix_tnt.AT5G05550_col_a_m1	AT5G05550	Sorghum	2922	2936	+	17.6667	2.23e-07	0.00297	AATCTCCGGCGAGGT
1016	REM_tnt.REM19_colamp_a_m1	REM19	Sorghum	747	767	-	18.8657	2.54e-07	0.00136	ACCAAAAAAAAAAAAAATAGA
1017	BBRBPC_tnt.BPC5_colamp_a_m1	BPC5	Sorghum	1149	1177	-	14.1463	2.55e-07	0.00125	TAGGCTACATATGAAGGAGAGAGAGAGAG
1018	REM_tnt.REM19_col_a_m1	REM19	Sorghum	748	762	-	18.5672	2.88e-07	0.00235	AAAAAAAAAAAATAG
1019	ABI3VP1_tnt.VRN1_col_a_m1	VRN1	Sorghum	735	763	+	5.95522	3.46e-07	0.000599	ACTATTAGTAGTTCTATTTTTTTTTTTTT
1020	REM_tnt.REM19_colamp_a_m1	REM19	Sorghum	746	766	-	18.0149	4.37e-07	0.002	CCAAAAAAAAAAAAAATAGAA
1021	Trihelix_tnt.At3g14180_col_m1	At3g14180	Sorghum	2923	2933	-	17.4848	5.41e-07	0.00602	TCGCCGGAGAT
1022	BBRBPC_tnt.BPC1_col_a_m1	BPC1	Sorghum	1138	1161	-	12.7424	5.71e-07	0.00205	GAGAGAGAGAGAGAGGTTATAGCA
1023	ABI3VP1_tnt.VRN1_col_a_m1	VRN1	Sorghum	736	764	+	3.92537	6.09e-07	0.000911	CTATTAGTAGTTCTATTTTTTTTTTTTTT
1024	ABI3VP1_tnt.VRN1_col_a_m1	VRN1	Sorghum	738	766	+	3.79104	6.32e-07	0.000916	ATTAGTAGTTCTATTTTTTTTTTTTTTGG
1025	BBRBPC_tnt.BPC1_col_a_m1	BPC1	Sorghum	1142	1165	-	12.4091	6.55e-07	0.00208	GAAGGAGAGAGAGAGAGAGGTTAT
1026	REM_tnt.REM19_colamp_a_m1	REM19	Sorghum	457	477	-	16.8507	8.81e-07	0.00267	TTGTCAAAAATAAATAAAAAT
1027	ABI3VP1_tnt.VRN1_col_a_m1	VRN1	Sorghum	740	768	+	2.0597	1.01e-06	0.00115	TAGTAGTTCTATTTTTTTTTTTTTTGGTA
1028	BBRBPC_tnt.BPC1_colamp_a_m1	BPC1	Sorghum	1151	1165	+	16.1364	1.12e-06	0.00791	CTCTCTCTCTCCTTC
1029	REM_tnt.REM19_colamp_a_m1	REM19	Sorghum	4149	4169	-	16.3582	1.17e-06	0.0029	TTTAAAAAAAAAATAAAATTT
1030	ABI3VP1_tnt.VRN1_colamp_a_m1	VRN1	Sorghum	751	769	+	16.4583	1.19e-06	0.00579	TTTTTTTTTTTTTTGGTAA
1031	ABI3VP1_tnt.VRN1_colamp_a_m1	VRN1	Sorghum	747	765	+	16.0278	1.49e-06	0.00599	TCTATTTTTTTTTTTTTTG
1032	REM_tnt.REM19_colamp_a_m1	REM19	Sorghum	752	772	-	15.5672	1.82e-06	0.0032	GTTTTACCAAAAAAAAAAAAA
1033	C2C2dof_tnt.At4g38000_col_a_m1	At4g38000	Sorghum	737	764	+	15.9697	1.83e-06	0.00331	TATTAGTAGTTCTATTTTTTTTTTTTTT
1034	C2C2dof_tnt.OBP3_col_a_m1	OBP3	Sorghum	747	767	+	15.7273	2.15e-06	0.00718	TCTATTTTTTTTTTTTTTGGT
1035	REM_tnt.REM19_col_a_m1	REM19	Sorghum	746	760	-	15.806	2.59e-06	0.00774	AAAAAAAAAATAGAA
1036	ABI3VP1_tnt.VRN1_col_a_m1	VRN1	Sorghum	2369	2397	+	-1.76119	2.67e-06	0.00225	TATAGTCTTTGTATTTTTGTTATTTTGGT
1037	REM_tnt.REM19_col_a_m1	REM19	Sorghum	1575	1589	+	15.6418	2.89e-06	0.00786	ATGAGAAAAAAAAAA
1038	BBRBPC_tnt.BPC1_colamp_a_m1	BPC1	Sorghum	1143	1157	+	13.7879	3.48e-06	0.0148	TAACCTCTCTCTCTC
1039	ABI3VP1_tnt.VRN1_col_a_m1	VRN1	Sorghum	3436	3464	+	-3.08955	3.69e-06	0.00274	TTTTAGGATTTTCAGATTTTTTTTCTTCC
1040	REM_tnt.REM19_colamp_a_m1	REM19	Sorghum	1863	1883	+	14.2388	3.71e-06	0.00462	GTGATAAAAAAAAAAGATTAC
1041	REM_tnt.REM19_colamp_a_m1	REM19	Sorghum	1861	1881	+	13.9701	4.26e-06	0.00489	TTGTGATAAAAAAAAAAGATT
1042	REM_tnt.REM19_colamp_a_m1	REM19	Sorghum	3942	3962	-	13.7313	4.81e-06	0.00524	TTTTTAAAAAAATAAAACATT
1043	ABI3VP1_tnt.VRN1_colamp_a_m1	VRN1	Sorghum	3448	3466	+	13.4722	4.85e-06	0.0106	CAGATTTTTTTTCTTCCTA
1044	REM_tnt.REM19_colamp_a_m1	REM19	Sorghum	744	764	-	13.6418	5.03e-06	0.00539	AAAAAAAAAAAAAATAGAACT
1045	BBRBPC_tnt.BPC1_col_a_m1	BPC1	Sorghum	1140	1163	-	7.07576	5.11e-06	0.00915	AGGAGAGAGAGAGAGAGGTTATAG
1046	C2C2dof_tnt.At4g38000_col_a_m1	At4g38000	Sorghum	738	765	+	14.4697	5.23e-06	0.00637	ATTAGTAGTTCTATTTTTTTTTTTTTTG
1047	REM_tnt.REM19_colamp_a_m1	REM19	Sorghum	743	763	-	13.4776	5.46e-06	0.00567	AAAAAAAAAAAAATAGAACTA
1048	ABI3VP1_tnt.VRN1_col_a_m1	VRN1	Sorghum	448	476	+	-4.97015	5.77e-06	0.00383	TACTGTAGTATTTTTATTTATTTTTGACA
1049	REM_tnt.REM19_colamp_a_m1	REM19	Sorghum	3510	3530	-	13.3284	5.88e-06	0.00587	TTTTGCAACAAAGAAAAACTA
1050	C2C2dof_tnt.At4g38000_col_a_m1	At4g38000	Sorghum	730	757	+	14.2879	5.91e-06	0.0068	TTTTTACTATTAGTAGTTCTATTTTTTT
1051	REM_tnt.REM19_col_a_m1	REM19	Sorghum	4151	4165	-	14.5075	6.06e-06	0.0103	AAAAAAAAATAAAAT
1052	ABI3VP1_tnt.VRN1_col_a_m1	VRN1	Sorghum	743	771	+	-5.38806	6.36e-06	0.00394	TAGTTCTATTTTTTTTTTTTTTGGTAAAA
1053	REM_tnt.REM19_colamp_a_m1	REM19	Sorghum	4148	4168	-	13.1642	6.38e-06	0.00613	TTAAAAAAAAAATAAAATTTC
1054	ND_tnt.FRS9_col_a_m1	FRS9	Sorghum	1711	1731	+	9.92424	6.49e-06	0.0112	CCCTCGCGCCCTTTCTCCCTC
1055	C2C2dof_tnt.OBP3_col_a_m1	OBP3	Sorghum	4389	4409	-	14.2273	6.68e-06	0.0121	CTTGCTTTTAATTTATTTTCA
1056	C2H2_tnt.TF3A_col_a_m1	TF3A	Sorghum	1719	1737	+	13.552	6.73e-06	0.0197	CCCTTTCTCCCTCCACCAC
1057	BBRBPC_tnt.BPC1_col_a_m1	BPC1	Sorghum	1704	1727	-	5.92424	7.7e-06	0.0103	GAGAAAGGGCGCGAGGGAGGAGAC
1058	ABI3VP1_tnt.VRN1_colamp_a_m1	VRN1	Sorghum	1863	1881	-	12.3056	7.86e-06	0.0128	AATCTTTTTTTTTTATCAC
1059	BBRBPC_tnt.BPC5_col_a_m1	BPC5	Sorghum	1956	1985	+	-34.7368	8.31e-06	0.0164	GCAGATCTAAAGAAAGACAGATATATTCAG
1060	ABI3VP1_tnt.VRN1_colamp_a_m1	VRN1	Sorghum	1573	1591	-	12.1389	8.39e-06	0.0129	CATTTTTTTTTTCTCATAT
1061	BBRBPC_tnt.BPC5_col_a_m1	BPC5	Sorghum	1137	1166	-	-35.7895	1.01e-05	0.0167	TGAAGGAGAGAGAGAGAGAGGTTATAGCAA
1062	C2C2dof_tnt.At4g38000_col_a_m1	At4g38000	Sorghum	735	762	+	13.4545	1.01e-05	0.01	ACTATTAGTAGTTCTATTTTTTTTTTTT
1063	C2C2dof_tnt.AT1G69570_col_a_m1	AT1G69570	Sorghum	723	749	+	13.4091	1.03e-05	0.0298	TGTGCACTTTTTACTATTAGTAGTTCT
1064	ABI3VP1_tnt.VRN1_colamp_a_m1	VRN1	Sorghum	1575	1593	-	11.5694	1.05e-05	0.0141	GGCATTTTTTTTTTCTCAT
1065	ABI3VP1_tnt.VRN1_col_a_m1	VRN1	Sorghum	4142	4170	+	-7.58209	1.05e-05	0.00527	AGCTGGGAAATTTTATTTTTTTTTTAAAA
1066	REM_tnt.REM19_col_a_m1	REM19	Sorghum	754	768	-	13.5075	1.1e-05	0.0149	TACCAAAAAAAAAAA
1067	ABI3VP1_tnt.VRN1_colamp_a_m1	VRN1	Sorghum	752	770	+	11.4444	1.1e-05	0.0142	TTTTTTTTTTTTTGGTAAA
1068	REM_tnt.REM19_colamp_a_m1	REM19	Sorghum	3940	3960	-	11.9701	1.14e-05	0.0084	TTTAAAAAAATAAAACATTTC
1069	REM_tnt.REM19_col_a_m1	REM19	Sorghum	1866	1880	+	13.403	1.17e-05	0.0149	ATAAAAAAAAAAGAT
1070	C2C2dof_tnt.At4g38000_col_a_m1	At4g38000	Sorghum	460	487	+	13.2121	1.18e-05	0.0113	TTTATTTATTTTTGACAAATATTTTTTC
1071	REM_tnt.REM19_col_a_m1	REM19	Sorghum	459	473	-	13.3731	1.18e-05	0.0149	CAAAAATAAATAAAA
1072	C2C2dof_tnt.OBP3_colamp_a_m1	OBP3	Sorghum	3043	3061	+	13.3182	1.23e-05	0.0362	TCTTCACCTTACCTTTTTA
1073	ABI3VP1_tnt.VRN1_col_a_m1	VRN1	Sorghum	732	760	+	-8.34328	1.24e-05	0.00565	TTTACTATTAGTAGTTCTATTTTTTTTTT
1074	REM_tnt.REM19_col_a_m1	REM19	Sorghum	3449	3463	-	13.194	1.31e-05	0.0158	GAAGAAAAAAAATCT
1075	C2C2dof_tnt.AT1G69570_col_a_m1	AT1G69570	Sorghum	3043	3069	+	13	1.32e-05	0.0325	TCTTCACCTTACCTTTTTACTTGCAAT
1076	REM_tnt.REM19_colamp_a_m1	REM19	Sorghum	2371	2391	-	11.5224	1.4e-05	0.009	ATAACAAAAATACAAAGACTA
1077	C2C2dof_tnt.At4g38000_col_a_m1	At4g38000	Sorghum	736	763	+	12.8485	1.48e-05	0.0131	CTATTAGTAGTTCTATTTTTTTTTTTTT
1078	REM_tnt.REM19_col_a_m1	REM19	Sorghum	4154	4168	-	12.9851	1.48e-05	0.0159	TTAAAAAAAAAATAA
1079	BBRBPC_tnt.BPC5_col_a_m1	BPC5	Sorghum	1147	1176	-	-37.9605	1.53e-05	0.0219	AGGCTACATATGAAGGAGAGAGAGAGAGAG
1080	ABI3VP1_tnt.VRN1_colamp_a_m1	VRN1	Sorghum	745	763	+	10.4306	1.6e-05	0.0177	GTTCTATTTTTTTTTTTTT
1081	ND_tnt.FRS9_col_a_m1	FRS9	Sorghum	1139	1159	+	7.45455	1.65e-05	0.0197	GCTATAACCTCTCTCTCTCTC
1082	C2C2dof_tnt.OBP3_col_a_m1	OBP3	Sorghum	748	768	+	12.8939	1.66e-05	0.0202	CTATTTTTTTTTTTTTTGGTA
1083	REM_tnt.REM19_col_a_m1	REM19	Sorghum	1578	1592	+	12.7612	1.69e-05	0.0166	AGAAAAAAAAAATGC
1084	C2H2_tnt.TF3A_col_a_m1	TF3A	Sorghum	1682	1700	+	11.856	1.8e-05	0.0317	GCTCCTTCTCCTCTGCGTC
1085	ABI3VP1_tnt.VRN1_colamp_a_m1	VRN1	Sorghum	1576	1594	-	9.875	1.95e-05	0.0185	CGGCATTTTTTTTTTCTCA
1086	BBRBPC_tnt.BPC5_col_a_m1	BPC5	Sorghum	1099	1128	-	-40.0658	2.14e-05	0.0263	GGTTATAGCAAGAGAGAAACACAACGTCAT
1087	C2C2dof_tnt.At4g38000_col_a_m1	At4g38000	Sorghum	731	758	+	12.1061	2.3e-05	0.0161	TTTTACTATTAGTAGTTCTATTTTTTTT
1088	ABI3VP1_tnt.VRN1_col_a_m1	VRN1	Sorghum	1567	1595	-	-11.2239	2.32e-05	0.00834	TCGGCATTTTTTTTTTCTCATATTGTGGG
1089	BBRBPC_tnt.BPC5_colamp_a_m1	BPC5	Sorghum	2069	2097	-	0.414634	2.34e-05	0.0187	AAGGGCAAAACAGTGAGAGGATTGGATAG
1090	C2C2dof_tnt.At4g38000_col_a_m1	At4g38000	Sorghum	734	761	+	12.0758	2.34e-05	0.0161	TACTATTAGTAGTTCTATTTTTTTTTTT
1091	ABI3VP1_tnt.VRN1_col_a_m1	VRN1	Sorghum	4141	4169	+	-11.4478	2.43e-05	0.00855	AAGCTGGGAAATTTTATTTTTTTTTTAAA
1092	REM_tnt.REM19_colamp_a_m1	REM19	Sorghum	4151	4171	-	10.0597	2.69e-05	0.014	ATTTTAAAAAAAAAATAAAAT
1093	C2C2dof_tnt.OBP3_col_a_m1	OBP3	Sorghum	1862	1882	-	12.1061	2.72e-05	0.0251	TAATCTTTTTTTTTTATCACA
1094	C2H2_tnt.TF3A_col_a_m1	TF3A	Sorghum	1679	1697	+	11.088	2.75e-05	0.038	CTGGCTCCTTCTCCTCTGC
1095	BBRBPC_tnt.BPC5_colamp_a_m1	BPC5	Sorghum	1145	1173	-	-0.341463	2.88e-05	0.0207	CTACATATGAAGGAGAGAGAGAGAGAGGT
1096	REM_tnt.REM19_colamp_a_m1	REM19	Sorghum	1860	1880	+	9.85075	2.95e-05	0.0149	CTTGTGATAAAAAAAAAAGAT
1097	C2C2dof_tnt.AT5G66940_col_a_m1	AT5G66940	Sorghum	3039	3067	+	11.8182	2.98e-05	0.0423	TCGATCTTCACCTTACCTTTTTACTTGCA
1098	BBRBPC_tnt.BPC1_colamp_a_m1	BPC1	Sorghum	1105	1119	+	8.51515	3.14e-05	0.0397	TTGTGTTTCTCTCTT
1099	ABI3VP1_tnt.VRN1_col_a_m1	VRN1	Sorghum	2368	2396	+	-12.7313	3.17e-05	0.01	GTATAGTCTTTGTATTTTTGTTATTTTGG
1100	ABI3VP1_tnt.VRN1_col_a_m1	VRN1	Sorghum	4386	4414	-	-12.7612	3.19e-05	0.01	TACTCCTTGCTTTTAATTTATTTTCAGCT
1101	REM_tnt.REM19_col_a_m1	REM19	Sorghum	745	759	-	11.3582	3.48e-05	0.0252	AAAAAAAAATAGAAC
1102	C2C2dof_tnt.AT5G66940_col_a_m1	AT5G66940	Sorghum	940	968	+	11.5	3.57e-05	0.0442	TTTTTACCATCTTAAACTTTTGGATTAAC
1103	ABI3VP1_tnt.VRN1_col_a_m1	VRN1	Sorghum	733	761	+	-13.3134	3.57e-05	0.0107	TTACTATTAGTAGTTCTATTTTTTTTTTT
1104	ABI3VP1_tnt.VRN1_col_a_m1	VRN1	Sorghum	2377	2405	+	-13.3284	3.58e-05	0.0107	TTGTATTTTTGTTATTTTGGTGTGTTGCA
1105	ND_tnt.FRS9_col_a_m1	FRS9	Sorghum	1717	1737	+	5.12121	3.72e-05	0.0344	CGCCCTTTCTCCCTCCACCAC
1106	C2H2_tnt.TF3A_col_a_m1	TF3A	Sorghum	3165	3183	-	10.512	3.75e-05	0.0389	CTTCACCTTGATCATCCAC
1107	C2H2_tnt.TF3A_col_a_m1	TF3A	Sorghum	2110	2128	+	10.488	3.8e-05	0.0389	CACCACCCTCTTCGTTCTC
1108	ABI3VP1_tnt.VRN1_col_a_m1	VRN1	Sorghum	2371	2399	+	-13.7313	3.89e-05	0.0114	TAGTCTTTGTATTTTTGTTATTTTGGTGT
1109	BBRBPC_tnt.BPC5_col_a_m1	BPC5	Sorghum	1141	1170	-	-43.5263	3.94e-05	0.0356	CATATGAAGGAGAGAGAGAGAGAGGTTATA
1110	ABI3VP1_tnt.VRN1_col_a_m1	VRN1	Sorghum	2373	2401	+	-13.8209	3.96e-05	0.0116	GTCTTTGTATTTTTGTTATTTTGGTGTGT
1111	BBRBPC_tnt.BPC5_col_a_m1	BPC5	Sorghum	1707	1736	-	-43.5789	3.97e-05	0.0356	TGGTGGAGGGAGAAAGGGCGCGAGGGAGGA
1112	C2H2_tnt.TF3A_col_a_m1	TF3A	Sorghum	1146	1164	+	10.28	4.25e-05	0.0396	CCTCTCTCTCTCTCTCCTT
1113	REM_tnt.REM19_col_a_m1	REM19	Sorghum	461	475	-	10.9403	4.27e-05	0.0279	GTCAAAAATAAATAA
1114	REM_tnt.REM19_colamp_a_m1	REM19	Sorghum	1574	1594	+	8.97015	4.29e-05	0.0194	TATGAGAAAAAAAAAATGCCG
1115	ABI3VP1_tnt.VRN1_colamp_a_m1	VRN1	Sorghum	4150	4168	+	7.44444	4.4e-05	0.0266	AATTTTATTTTTTTTTTAA
1116	BBRBPC_tnt.BPC1_colamp_a_m1	BPC1	Sorghum	1717	1731	+	7.57576	4.42e-05	0.0484	CGCCCTTTCTCCCTC
1117	REM_tnt.REM19_colamp_a_m1	REM19	Sorghum	3582	3602	-	8.85075	4.5e-05	0.0198	TTTATAAAAAATATAAGAGAG
1118	REM_tnt.REM19_colamp_a_m1	REM19	Sorghum	1864	1884	+	8.83582	4.53e-05	0.0198	TGATAAAAAAAAAAGATTACA
1119	ABI3VP1_tnt.VRN1_col_a_m1	VRN1	Sorghum	2372	2400	+	-14.4925	4.53e-05	0.0126	AGTCTTTGTATTTTTGTTATTTTGGTGTG
1120	ABI3VP1_tnt.VRN1_colamp_a_m1	VRN1	Sorghum	4152	4170	+	7.23611	4.7e-05	0.027	TTTTATTTTTTTTTTAAAA
1121	C2C2dof_tnt.At4g38000_col_a_m1	At4g38000	Sorghum	447	474	+	10.803	4.8e-05	0.0245	ATACTGTAGTATTTTTATTTATTTTTGA
1122	REM_tnt.REM19_colamp_a_m1	REM19	Sorghum	1572	1592	+	8.68657	4.82e-05	0.0207	AATATGAGAAAAAAAAAATGC
1123	BBRBPC_tnt.BPC5_colamp_a_m1	BPC5	Sorghum	1107	1135	-	-2.29268	4.85e-05	0.0279	AGAGAAAGGTTATAGCAAGAGAGAAACAC
1124	REM_tnt.REM19_colamp_a_m1	REM19	Sorghum	742	762	-	8.61194	4.97e-05	0.021	AAAAAAAAAAAATAGAACTAC
1125	ND_tnt.FRS9_col_a_m1	FRS9	Sorghum	1103	1123	+	4.24242	4.98e-05	0.0407	CGTTGTGTTTCTCTCTTGCTA
1126	C2C2dof_tnt.OBP3_col_a_m1	OBP3	Sorghum	4148	4168	+	10.9394	5.39e-05	0.0377	GAAATTTTATTTTTTTTTTAA
1127	BBRBPC_tnt.BPC5_colamp_a_m1	BPC5	Sorghum	1711	1739	-	-2.7439	5.45e-05	0.0296	CCGTGGTGGAGGGAGAAAGGGCGCGAGGG
1128	C2C2dof_tnt.At4g38000_col_a_m1	At4g38000	Sorghum	461	488	+	10.5455	5.51e-05	0.0262	TTATTTATTTTTGACAAATATTTTTTCA
1129	BBRBPC_tnt.BPC5_colamp_a_m1	BPC5	Sorghum	1949	1977	+	-2.80488	5.54e-05	0.0297	TAGCGGTGCAGATCTAAAGAAAGACAGAT
1130	C2C2dof_tnt.OBP3_col_a_m1	OBP3	Sorghum	749	769	+	10.8636	5.62e-05	0.0377	TATTTTTTTTTTTTTTGGTAA
1131	C2C2dof_tnt.OBP3_col_a_m1	OBP3	Sorghum	1569	1589	-	10.8182	5.77e-05	0.0382	TTTTTTTTTTCTCATATTGTG
1132	BBRBPC_tnt.BPC1_col_a_m1	BPC1	Sorghum	1714	1737	-	-0.257576	5.82e-05	0.0343	GTGGTGGAGGGAGAAAGGGCGCGA
1133	BBRBPC_tnt.BPC1_col_a_m1	BPC1	Sorghum	1106	1129	-	-0.287879	5.88e-05	0.0343	AGGTTATAGCAAGAGAGAAACACA
1134	BBRBPC_tnt.BPC1_col_a_m1	BPC1	Sorghum	1712	1735	-	-0.409091	6.1e-05	0.0345	GGTGGAGGGAGAAAGGGCGCGAGG
1135	REM_tnt.REM19_colamp_a_m1	REM19	Sorghum	1570	1590	+	8.0597	6.22e-05	0.0243	ACAATATGAGAAAAAAAAAAT
1136	C2C2dof_tnt.At4g38000_col_a_m1	At4g38000	Sorghum	739	766	+	10.2727	6.37e-05	0.028	TTAGTAGTTCTATTTTTTTTTTTTTTGG
1137	C2C2dof_tnt.At4g38000_col_a_m1	At4g38000	Sorghum	3597	3624	-	10.2576	6.42e-05	0.028	TATTTTCAACATCACCTCTTTTTTTATA
1138	BBRBPC_tnt.BPC5_colamp_a_m1	BPC5	Sorghum	1707	1735	-	-3.40244	6.46e-05	0.0325	GGTGGAGGGAGAAAGGGCGCGAGGGAGGA
1139	C2C2dof_tnt.At4g38000_col_a_m1	At4g38000	Sorghum	1487	1514	-	10.2424	6.47e-05	0.0281	TCTATCAGTCATTTAGTATTATTTTTCT
1140	C2C2dof_tnt.OBP3_col_a_m1	OBP3	Sorghum	3045	3065	+	10.6061	6.49e-05	0.0395	TTCACCTTACCTTTTTACTTG
1141	BBRBPC_tnt.BPC5_colamp_a_m1	BPC5	Sorghum	1783	1811	-	-3.5122	6.64e-05	0.0328	AATGGGAGGTGAGAAGAGGGCAGTAAGAA
1142	REM_tnt.REM19_colamp_a_m1	REM19	Sorghum	454	474	-	7.8209	6.85e-05	0.0261	TCAAAAATAAATAAAAATACT
1143	C2C2dof_tnt.At4g38000_col_a_m1	At4g38000	Sorghum	552	579	+	10.1212	6.89e-05	0.0294	TATTTTTATCTATATTTAATATTCTATG
1144	ABI3VP1_tnt.VRN1_col_a_m1	VRN1	Sorghum	2367	2395	+	-16.7015	7e-05	0.0169	AGTATAGTCTTTGTATTTTTGTTATTTTG
1145	REM_tnt.REM19_colamp_a_m1	REM19	Sorghum	3448	3468	-	7.74627	7.06e-05	0.0264	GATAGGAAGAAAAAAAATCTG
1146	REM_tnt.REM19_colamp_a_m1	REM19	Sorghum	3941	3961	-	7.70149	7.18e-05	0.0266	TTTTAAAAAAATAAAACATTT
1147	ABI3VP1_tnt.VRN1_col_a_m1	VRN1	Sorghum	447	475	+	-16.8657	7.23e-05	0.017	ATACTGTAGTATTTTTATTTATTTTTGAC
1148	REM_tnt.REM19_colamp_a_m1	REM19	Sorghum	2382	2402	-	7.50746	7.76e-05	0.0277	AACACACCAAAATAACAAAAA
1149	ABI3VP1_tnt.VRN1_colamp_a_m1	VRN1	Sorghum	753	771	+	5.47222	8.03e-05	0.0359	TTTTTTTTTTTTGGTAAAA
1150	REM_tnt.REM19_colamp_a_m1	REM19	Sorghum	2373	2393	-	7.37313	8.18e-05	0.0281	AAATAACAAAAATACAAAGAC
1151	ABI3VP1_tnt.VRN1_col_a_m1	VRN1	Sorghum	4144	4172	+	-17.5672	8.27e-05	0.0185	CTGGGAAATTTTATTTTTTTTTTAAAATG
1152	REM_tnt.REM19_colamp_a_m1	REM19	Sorghum	4147	4167	-	7.34328	8.28e-05	0.0281	TAAAAAAAAAATAAAATTTCC
1153	ABI3VP1_tnt.VRN1_col_a_m1	VRN1	Sorghum	4143	4171	+	-17.6269	8.37e-05	0.0186	GCTGGGAAATTTTATTTTTTTTTTAAAAT
1154	ABI3VP1_tnt.VRN1_col_a_m1	VRN1	Sorghum	544	572	+	-17.6866	8.46e-05	0.0187	TAATTAATTATTTTTATCTATATTTAATA
1155	REM_tnt.REM19_col_a_m1	REM19	Sorghum	3944	3958	-	9.40299	8.63e-05	0.0402	TAAAAAAATAAAACA
1156	BBRBPC_tnt.BPC1_col_a_m1	BPC1	Sorghum	1125	1148	-	-1.60606	8.72e-05	0.0408	AGGTTATAGCAAGAGAGAAAGGTT
1157	REM_tnt.REM19_colamp_a_m1	REM19	Sorghum	1573	1593	+	7.19403	8.77e-05	0.029	ATATGAGAAAAAAAAAATGCC
1158	C2C2dof_tnt.OBP3_col_a_m1	OBP3	Sorghum	4153	4173	+	10.0455	8.77e-05	0.0477	TTTATTTTTTTTTTAAAATGT
1159	REM_tnt.REM19_colamp_a_m1	REM19	Sorghum	740	760	-	7.13433	8.98e-05	0.0293	AAAAAAAAAATAGAACTACTA
1160	ABI3VP1_tnt.VRN1_col_a_m1	VRN1	Sorghum	3435	3463	+	-18	8.98e-05	0.0193	GTTTTAGGATTTTCAGATTTTTTTTCTTC
1161	ABI3VP1_tnt.VRN1_colamp_a_m1	VRN1	Sorghum	3451	3469	+	5.08333	8.98e-05	0.0393	ATTTTTTTTCTTCCTATCC
1162	REM_tnt.REM19_colamp_a_m1	REM19	Sorghum	3447	3467	-	7.1194	9.03e-05	0.0294	ATAGGAAGAAAAAAAATCTGA
1163	REM_tnt.REM19_col_a_m1	REM19	Sorghum	2377	2391	-	9.28358	9.07e-05	0.042	ATAACAAAAATACAA
1164	REM_tnt.REM19_col_a_m1	REM19	Sorghum	1576	1590	+	9.25373	9.19e-05	0.0423	TGAGAAAAAAAAAAT
1165	ABI3VP1_tnt.VRN1_col_a_m1	VRN1	Sorghum	2366	2394	+	-18.194	9.32e-05	0.0195	CAGTATAGTCTTTGTATTTTTGTTATTTT
1166	BBRBPC_tnt.BPC5_colamp_a_m1	BPC5	Sorghum	1703	1731	-	-4.87805	9.36e-05	0.0406	GAGGGAGAAAGGGCGCGAGGGAGGAGACA
1167	ABI3VP1_tnt.VRN1_col_a_m1	VRN1	Sorghum	2370	2398	+	-18.3134	9.53e-05	0.0197	ATAGTCTTTGTATTTTTGTTATTTTGGTG
1168	REM_tnt.REM19_colamp_a_m1	REM19	Sorghum	1481	1501	+	6.95522	9.62e-05	0.0306	TTTGAGAGAAAAATAATACTA
1169	C2C2dof_tnt.OBP3_col_a_m1	OBP3	Sorghum	3580	3600	+	9.86364	9.65e-05	0.0499	CTCTCTCTTATATTTTTTATA
1170	REM_tnt.REM19_colamp_a_m1	REM19	Sorghum	453	473	-	6.92537	9.74e-05	0.0306	CAAAAATAAATAAAAATACTA
1171	C2C2dof_tnt.At4g38000_col_a_m1	At4g38000	Sorghum	1106	1133	+	9.42424	9.85e-05	0.0358	TGTGTTTCTCTCTTGCTATAACCTTTCT
1172	BBRBPC_tnt.BPC5_colamp_a_m1	BPC5	Sorghum	1153	1181	-	-5.13415	9.97e-05	0.0421	CTACTAGGCTACATATGAAGGAGAGAGAG
1173	REM_tnt.REM19_col_a_m1	REM19	Sorghum	2375	2389	-	9.0597	9.98e-05	0.044	AACAAAAATACAAAG
1174	C2H2_tnt.TF3A_col_a_m1	TF3A	Switchgrass	427	445	-	31.048	1.66e-12	1.07e-07	CCTCCTCCTCCTCCTCCTC
1175	C2H2_tnt.TF3A_col_a_m1	TF3A	Switchgrass	424	442	-	27.672	6.54e-11	2.11e-06	CCTCCTCCTCCTCCTCCGC
1176	C2C2dof_tnt.AT5G66940_col_a_m1	AT5G66940	Switchgrass	3779	3807	+	24.9091	1.01e-10	6.45e-06	TCATTTTTTTTTTTTGCTTTATTTATTTT
1177	ABI3VP1_tnt.VRN1_col_a_m1	VRN1	Switchgrass	776	804	+	25.4776	3.62e-10	2.25e-05	TTTTATTTTTTTATTTTTTATTTTTGTTT
1178	C2C2dof_tnt.At4g38000_col_a_m1	At4g38000	Switchgrass	781	808	+	24.3182	6.52e-10	4.13e-05	TTTTTTTATTTTTTATTTTTGTTTTTTA
1179	ABI3VP1_tnt.VRN1_col_a_m1	VRN1	Switchgrass	773	801	+	21.9701	1.58e-09	3.21e-05	TTTTTTTATTTTTTTATTTTTTATTTTTG
1180	C2H2_tnt.TF3A_col_a_m1	TF3A	Switchgrass	421	439	-	24.376	1.9e-09	4.08e-05	CCTCCTCCTCCTCCGCCGC
1181	ABI3VP1_tnt.VRN1_col_a_m1	VRN1	Switchgrass	775	803	+	20.1045	3.28e-09	3.21e-05	TTTTTATTTTTTTATTTTTTATTTTTGTT
1182	ABI3VP1_tnt.VRN1_col_a_m1	VRN1	Switchgrass	780	808	+	19.9851	3.43e-09	3.21e-05	ATTTTTTTATTTTTTATTTTTGTTTTTTA
1183	ABI3VP1_tnt.VRN1_col_a_m1	VRN1	Switchgrass	781	809	+	19.7612	3.74e-09	3.21e-05	TTTTTTTATTTTTTATTTTTGTTTTTTAC
1184	ABI3VP1_tnt.VRN1_col_a_m1	VRN1	Switchgrass	769	797	+	19.5075	4.12e-09	3.21e-05	GCGGTTTTTTTATTTTTTTATTTTTTATT
1185	ABI3VP1_tnt.VRN1_col_a_m1	VRN1	Switchgrass	772	800	+	18.9851	5.01e-09	3.47e-05	GTTTTTTTATTTTTTTATTTTTTATTTTT
1186	ABI3VP1_tnt.VRN1_col_a_m1	VRN1	Switchgrass	774	802	+	18.6418	5.69e-09	3.55e-05	TTTTTTATTTTTTTATTTTTTATTTTTGT
1187	C2C2dof_tnt.At4g38000_col_a_m1	At4g38000	Switchgrass	775	802	+	22.3788	6.08e-09	0.000183	TTTTTATTTTTTTATTTTTTATTTTTGT
1188	C2H2_tnt.TF3A_col_a_m1	TF3A	Switchgrass	430	448	-	22.968	7.22e-09	0.000116	GCCCCTCCTCCTCCTCCTC
1189	ABI3VP1_tnt.VRN1_col_a_m1	VRN1	Switchgrass	782	810	+	17.9403	7.37e-09	3.83e-05	TTTTTTATTTTTTATTTTTGTTTTTTACA
1190	ABI3VP1_tnt.VRN1_col_a_m1	VRN1	Switchgrass	3784	3812	+	16.791	1.11e-08	4.96e-05	TTTTTTTTTTGCTTTATTTATTTTCTTGC
1191	BBRBPC_tnt.BPC5_colamp_a_m1	BPC5	Switchgrass	1115	1143	+	20.8902	1.39e-08	0.00022	TAAGAAAAAAGAGGGAGGGAGGGAGAGAG
1192	ND_tnt.FRS9_col_a_m1	FRS9	Switchgrass	2372	2392	+	22.5303	1.42e-08	0.000188	CCCTCTCTCCCTCTCCCTCTA
1193	ABI3VP1_tnt.VRN1_col_a_m1	VRN1	Switchgrass	777	805	+	15.9552	1.49e-08	6.21e-05	TTTATTTTTTTATTTTTTATTTTTGTTTT
1194	ABI3VP1_tnt.VRN1_col_a_m1	VRN1	Switchgrass	3780	3808	+	15.6866	1.64e-08	6.39e-05	CATTTTTTTTTTTTGCTTTATTTATTTTC
1195	C2C2dof_tnt.At4g38000_col_a_m1	At4g38000	Switchgrass	1603	1630	-	21.303	1.86e-08	0.000236	CTTCTTCCTCTTCTCTCTTTTCTTTTTT
1196	BBRBPC_tnt.BPC5_colamp_a_m1	BPC5	Switchgrass	1113	1141	+	20.0122	2.1e-08	0.000267	ACTAAGAAAAAAGAGGGAGGGAGGGAGAG
1197	BBRBPC_tnt.BPC5_col_a_m1	BPC5	Switchgrass	3136	3165	+	-6.27632	2.2e-08	0.00142	TGATAGAGACAGACAGACAGACAGACACAA
1198	C2C2dof_tnt.OBP3_colamp_a_m1	OBP3	Switchgrass	3783	3801	+	18.1818	2.56e-08	0.00166	TTTTTTTTTTTGCTTTATT
1199	C2C2dof_tnt.AT1G69570_col_a_m1	AT1G69570	Switchgrass	1594	1620	-	20.5152	4.05e-08	0.000865	TTCTCTCTTTTCTTTTTTTTTCCTCTT
1200	C2C2dof_tnt.AT5G66940_col_a_m1	AT5G66940	Switchgrass	1597	1625	-	20.1515	4.3e-08	0.000883	TCCTCTTCTCTCTTTTCTTTTTTTTTCCT
1201	BBRBPC_tnt.BPC5_colamp_a_m1	BPC5	Switchgrass	1117	1145	+	18.4268	4.31e-08	0.000455	AGAAAAAAGAGGGAGGGAGGGAGAGAGGC
1202	BBRBPC_tnt.BPC1_col_a_m1	BPC1	Switchgrass	1121	1144	+	18.4545	4.57e-08	0.000724	AAAAGAGGGAGGGAGGGAGAGAGG
1203	ABI3VP1_tnt.VRN1_col_a_m1	VRN1	Switchgrass	1599	1627	-	12.1343	5.36e-08	0.000176	CTTCCTCTTCTCTCTTTTCTTTTTTTTTC
1204	Trihelix_tnt.AT3G58630_col_a_m1	AT3G58630	Switchgrass	3400	3414	+	19	5.55e-08	0.000739	CCATCTCCGGCGAGG
1205	Trihelix_tnt.AT5G05550_colamp_a_m1	AT5G05550	Switchgrass	3401	3415	+	18.803	5.65e-08	0.000859	CATCTCCGGCGAGGT
1206	BBRBPC_tnt.BPC5_col_a_m1	BPC5	Switchgrass	1120	1149	+	-10.8816	6.29e-08	0.00203	AAAAAGAGGGAGGGAGGGAGAGAGGCGAAG
1207	REM_tnt.REM19_colamp_a_m1	REM19	Switchgrass	3778	3798	-	20.8209	6.6e-08	0.000902	AAAGCAAAAAAAAAAAATGAC
1208	C2C2dof_tnt.At4g38000_col_a_m1	At4g38000	Switchgrass	3774	3801	+	19.803	7.88e-08	0.000624	TTCAGTCATTTTTTTTTTTTGCTTTATT
1209	C2H2_tnt.TF3A_col_a_m1	TF3A	Switchgrass	467	485	-	20.032	8.22e-08	0.000756	CTCCCTTATCCTCTTCCTC
1210	ABI3VP1_tnt.VRN1_col_a_m1	VRN1	Switchgrass	766	794	+	10.5522	8.83e-08	0.00025	TCAGCGGTTTTTTTATTTTTTTATTTTTT
1211	C2C2dof_tnt.AT5G66940_colamp_a_m1	AT5G66940	Switchgrass	3787	3807	+	18.4697	9.09e-08	0.00592	TTTTTTTGCTTTATTTATTTT
1212	C2C2dof_tnt.OBP3_col_a_m1	OBP3	Switchgrass	1593	1613	-	19.1364	9.39e-08	0.00138	TTTTCTTTTTTTTTCCTCTTC
1213	ABI3VP1_tnt.VRN1_colamp_a_m1	VRN1	Switchgrass	3780	3798	+	20.5694	9.77e-08	0.00147	CATTTTTTTTTTTTGCTTT
1214	Trihelix_tnt.AT3G58630_colamp_a_m1	AT3G58630	Switchgrass	3400	3414	+	18.5303	9.8e-08	0.00131	CCATCTCCGGCGAGG
1215	ABI3VP1_tnt.VRN1_col_a_m1	VRN1	Switchgrass	779	807	+	10.0896	1.02e-07	0.000276	TATTTTTTTATTTTTTATTTTTGTTTTTT
1216	ND_tnt.FRS9_col_a_m1	FRS9	Switchgrass	1123	1143	-	19.0152	1.03e-07	0.000814	CTCTCTCCCTCCCTCCCTCTT
1217	C2C2dof_tnt.OBP3_col_a_m1	OBP3	Switchgrass	785	805	+	18.9848	1.1e-07	0.00138	TTTATTTTTTATTTTTGTTTT
1218	C2C2dof_tnt.At4g38000_col_a_m1	At4g38000	Switchgrass	773	800	+	19.4242	1.11e-07	0.000714	TTTTTTTATTTTTTTATTTTTTATTTTT
1219	BBRBPC_tnt.BPC5_colamp_a_m1	BPC5	Switchgrass	1121	1149	+	16.1707	1.13e-07	0.000895	AAAAGAGGGAGGGAGGGAGAGAGGCGAAG
1220	C2C2dof_tnt.OBP3_col_a_m1	OBP3	Switchgrass	777	797	+	18.9545	1.13e-07	0.00138	TTTATTTTTTTATTTTTTATT
1221	ABI3VP1_tnt.VRN1_colamp_a_m1	VRN1	Switchgrass	3778	3796	+	20.3611	1.14e-07	0.00147	GTCATTTTTTTTTTTTGCT
1222	REM_tnt.REM19_col_a_m1	REM19	Switchgrass	3782	3796	-	19.4328	1.14e-07	0.00149	AGCAAAAAAAAAAAA
1223	BBRBPC_tnt.BPC5_col_a_m1	BPC5	Switchgrass	3132	3161	+	-13.4605	1.19e-07	0.00241	AATTTGATAGAGACAGACAGACAGACAGAC
1224	ABI3VP1_tnt.VRN1_col_a_m1	VRN1	Switchgrass	768	796	+	9.53731	1.21e-07	0.000301	AGCGGTTTTTTTATTTTTTTATTTTTTAT
1225	BBRBPC_tnt.BPC1_col_a_m1	BPC1	Switchgrass	1123	1146	+	16.2727	1.25e-07	0.00112	AAGAGGGAGGGAGGGAGAGAGGCG
1226	BBRBPC_tnt.BPC1_col_a_m1	BPC1	Switchgrass	1642	1665	+	16.2121	1.28e-07	0.00112	GAGAAAAAGAAAAGGAGGGAGCGA
1227	BBRBPC_tnt.BPC5_colamp_a_m1	BPC5	Switchgrass	1630	1658	+	15.8293	1.3e-07	0.000916	GAAATGAGGAAGGAGAAAAAGAAAAGGAG
1228	C2C2dof_tnt.At4g38000_col_a_m1	At4g38000	Switchgrass	782	809	+	19	1.62e-07	0.00081	TTTTTTATTTTTTATTTTTGTTTTTTAC
1229	BBRBPC_tnt.BPC1_col_a_m1	BPC1	Switchgrass	1119	1142	+	15.6667	1.64e-07	0.00112	AAAAAAGAGGGAGGGAGGGAGAGA
1230	C2C2dof_tnt.AT5G66940_col_a_m1	AT5G66940	Switchgrass	1602	1630	-	18.7879	1.66e-07	0.00177	CTTCTTCCTCTTCTCTCTTTTCTTTTTTT
1231	ABI3VP1_tnt.VRN1_col_a_m1	VRN1	Switchgrass	778	806	+	8.43284	1.68e-07	0.000399	TTATTTTTTTATTTTTTATTTTTGTTTTT
1232	BBRBPC_tnt.BPC1_col_a_m1	BPC1	Switchgrass	2371	2394	-	15.5	1.76e-07	0.00112	CCTAGAGGGAGAGGGAGAGAGGGT
1233	BBRBPC_tnt.BPC5_colamp_a_m1	BPC5	Switchgrass	1624	1652	+	14.9756	1.84e-07	0.00116	GAAGAAGAAATGAGGAAGGAGAAAAAGAA
1234	C2C2dof_tnt.At4g38000_col_a_m1	At4g38000	Switchgrass	780	807	+	18.8485	1.85e-07	0.000836	ATTTTTTTATTTTTTATTTTTGTTTTTT
1235	C2H2_tnt.TF3A_col_a_m1	TF3A	Switchgrass	418	436	-	18.896	1.92e-07	0.00155	CCTCCTCCTCCGCCGCCGC
1236	REM_tnt.REM19_colamp_a_m1	REM19	Switchgrass	3782	3802	-	19.2537	1.97e-07	0.00131	AAATAAAGCAAAAAAAAAAAA
1237	REM_tnt.REM19_colamp_a_m1	REM19	Switchgrass	789	809	-	19.1642	2.09e-07	0.00131	GTAAAAAACAAAAATAAAAAA
1238	Trihelix_tnt.AT5G05550_col_a_m1	AT5G05550	Switchgrass	3401	3415	+	17.697	2.14e-07	0.00297	CATCTCCGGCGAGGT
1239	REM_tnt.REM19_colamp_a_m1	REM19	Switchgrass	785	805	-	19.0597	2.24e-07	0.00131	AAAACAAAAATAAAAAATAAA
1240	BBRBPC_tnt.BPC5_col_a_m1	BPC5	Switchgrass	1122	1151	+	-16.5658	2.25e-07	0.00241	AAAGAGGGAGGGAGGGAGAGAGGCGAAGCC
1241	ND_tnt.FRS9_col_a_m1	FRS9	Switchgrass	1121	1141	-	17.5	2.26e-07	0.00111	CTCTCCCTCCCTCCCTCTTTT
1242	ABI3VP1_tnt.VRN1_colamp_a_m1	VRN1	Switchgrass	3781	3799	+	19.2639	2.39e-07	0.00171	ATTTTTTTTTTTTGCTTTA
1243	ND_tnt.FRS9_col_a_m1	FRS9	Switchgrass	2370	2390	+	17.3333	2.45e-07	0.00112	TACCCTCTCTCCCTCTCCCTC
1244	ABI3VP1_tnt.VRN1_col_a_m1	VRN1	Switchgrass	771	799	+	6.9403	2.61e-07	0.000493	GGTTTTTTTATTTTTTTATTTTTTATTTT
1245	BBRBPC_tnt.BPC5_colamp_a_m1	BPC5	Switchgrass	1592	1620	+	14.0366	2.66e-07	0.00125	AGAAGAGGAAAAAAAAAGAAAAGAGAGAA
1246	C2C2dof_tnt.OBP3_col_a_m1	OBP3	Switchgrass	1600	1620	-	18.0455	2.81e-07	0.00223	TTCTCTCTTTTCTTTTTTTTT
1247	BBRBPC_tnt.BPC5_colamp_a_m1	BPC5	Switchgrass	1636	1664	+	13.8415	2.87e-07	0.00125	AGGAAGGAGAAAAAGAAAAGGAGGGAGCG
1248	C2C2dof_tnt.AT1G69570_col_a_m1	AT1G69570	Switchgrass	1589	1615	-	18.303	2.94e-07	0.00276	TCTTTTCTTTTTTTTTCCTCTTCTTGA
1249	BBRBPC_tnt.BPC5_colamp_a_m1	BPC5	Switchgrass	1604	1632	+	13.7683	2.95e-07	0.00125	AAAAAGAAAAGAGAGAAGAGGAAGAAGAA
1250	ABI3VP1_tnt.VRN1_col_a_m1	VRN1	Switchgrass	765	793	+	6.31343	3.12e-07	0.000556	ATCAGCGGTTTTTTTATTTTTTTATTTTT
1251	ND_tnt.FRS9_col_a_m1	FRS9	Switchgrass	1129	1149	-	16.7727	3.24e-07	0.00129	CTTCGCCTCTCTCCCTCCCTC
1252	BBRBPC_tnt.BPC1_col_a_m1	BPC1	Switchgrass	1125	1148	+	13.9545	3.44e-07	0.00168	GAGGGAGGGAGGGAGAGAGGCGAA
1253	C2C2dof_tnt.At4g38000_col_a_m1	At4g38000	Switchgrass	1600	1627	-	17.9545	3.93e-07	0.00125	CTTCCTCTTCTCTCTTTTCTTTTTTTTT
1254	C2H2_tnt.TF3A_col_a_m1	TF3A	Switchgrass	464	482	-	17.896	3.97e-07	0.00256	CCTTATCCTCTTCCTCATT
1255	C2C2dof_tnt.At4g38000_col_a_m1	At4g38000	Switchgrass	1592	1619	-	17.9394	3.98e-07	0.00125	TCTCTCTTTTCTTTTTTTTTCCTCTTCT
1256	C2C2dof_tnt.OBP3_col_a_m1	OBP3	Switchgrass	1598	1618	-	17.6667	4.02e-07	0.00284	CTCTCTTTTCTTTTTTTTTCC
1257	BBRBPC_tnt.BPC1_col_a_m1	BPC1	Switchgrass	2369	2392	-	13.5	4.17e-07	0.00189	TAGAGGGAGAGGGAGAGAGGGTAC
1258	C2C2dof_tnt.At4g38000_col_a_m1	At4g38000	Switchgrass	3783	3810	+	17.8788	4.18e-07	0.00125	TTTTTTTTTTTGCTTTATTTATTTTCTT
1259	ABI3VP1_tnt.VRN1_col_a_m1	VRN1	Switchgrass	783	811	+	5.26866	4.2e-07	0.000707	TTTTTATTTTTTATTTTTGTTTTTTACAA
1260	ND_tnt.FRS9_col_a_m1	FRS9	Switchgrass	1125	1145	-	16.2121	4.25e-07	0.0016	GCCTCTCTCCCTCCCTCCCTC
1261	BBRBPC_tnt.BPC5_col_a_m1	BPC5	Switchgrass	1118	1147	+	-19.6711	4.59e-07	0.00423	GAAAAAAGAGGGAGGGAGGGAGAGAGGCGA
1262	ABI3VP1_tnt.VRN1_col_a_m1	VRN1	Switchgrass	767	795	+	4.92537	4.62e-07	0.000758	CAGCGGTTTTTTTATTTTTTTATTTTTTA
1263	REM_tnt.REM19_colamp_a_m1	REM19	Switchgrass	779	799	-	17.9104	4.66e-07	0.002	AAAATAAAAAATAAAAAAATA
1264	ND_tnt.FRS9_col_a_m1	FRS9	Switchgrass	1638	1658	-	16.0152	4.67e-07	0.00166	CTCCTTTTCTTTTTCTCCTTC
1265	REM_tnt.REM19_col_a_m1	REM19	Switchgrass	3779	3793	-	17.9552	4.71e-07	0.00317	AAAAAAAAAAAATGA
1266	REM_tnt.REM19_col_a_m1	REM19	Switchgrass	3781	3795	-	17.9104	4.85e-07	0.00317	GCAAAAAAAAAAAAT
1267	C2C2dof_tnt.AT5G66940_col_a_m1	AT5G66940	Switchgrass	773	801	+	17.5758	4.97e-07	0.00286	TTTTTTTATTTTTTTATTTTTTATTTTTG
1268	BBRBPC_tnt.BPC5_colamp_a_m1	BPC5	Switchgrass	1634	1662	+	12.3171	5.12e-07	0.0018	TGAGGAAGGAGAAAAAGAAAAGGAGGGAG
1269	C2C2dof_tnt.AT5G66940_col_a_m1	AT5G66940	Switchgrass	779	807	+	17.5303	5.17e-07	0.00286	TATTTTTTTATTTTTTATTTTTGTTTTTT
1270	REM_tnt.REM19_colamp_a_m1	REM19	Switchgrass	3780	3800	-	17.7015	5.3e-07	0.00206	ATAAAGCAAAAAAAAAAAATG
1271	BBRBPC_tnt.BPC5_col_a_m1	BPC5	Switchgrass	3140	3169	+	-20.4474	5.37e-07	0.00433	AGAGACAGACAGACAGACAGACACAATTAT
1272	C2C2dof_tnt.OBP3_col_a_m1	OBP3	Switchgrass	778	798	+	17.3485	5.38e-07	0.00311	TTATTTTTTTATTTTTTATTT
1273	Trihelix_tnt.At3g14180_col_m1	At3g14180	Switchgrass	3402	3412	-	17.4848	5.41e-07	0.00602	TCGCCGGAGAT
1274	C2C2dof_tnt.AT5G66940_col_a_m1	AT5G66940	Switchgrass	780	808	+	17.4697	5.45e-07	0.00286	ATTTTTTTATTTTTTATTTTTGTTTTTTA
1275	REM_tnt.REM19_col_a_m1	REM19	Switchgrass	793	807	-	17.7164	5.82e-07	0.00346	AAAAAACAAAAATAA
1276	BBRBPC_tnt.BPC1_col_a_m1	BPC1	Switchgrass	2365	2388	-	12.5909	6.08e-07	0.00205	GGGAGAGGGAGAGAGGGTACCAGC
1277	C2C2dof_tnt.AT5G66940_col_a_m1	AT5G66940	Switchgrass	772	800	+	17.3333	6.12e-07	0.00286	GTTTTTTTATTTTTTTATTTTTTATTTTT
1278	BBRBPC_tnt.BPC1_col_a_m1	BPC1	Switchgrass	1640	1663	+	12.5606	6.16e-07	0.00205	AGGAGAAAAAGAAAAGGAGGGAGC
1279	C2C2dof_tnt.At4g38000_col_a_m1	At4g38000	Switchgrass	1602	1629	-	17.1364	7.57e-07	0.00178	TTCTTCCTCTTCTCTCTTTTCTTTTTTT
1280	ABI3VP1_tnt.VRN1_col_a_m1	VRN1	Switchgrass	1592	1620	-	3.01493	7.8e-07	0.001	TTCTCTCTTTTCTTTTTTTTTCCTCTTCT
1281	REM_tnt.REM19_colamp_a_m1	REM19	Switchgrass	772	792	-	17.0299	7.93e-07	0.00267	AAAATAAAAAAATAAAAAAAC
1282	ABI3VP1_tnt.VRN1_col_a_m1	VRN1	Switchgrass	3776	3804	+	2.79104	8.28e-07	0.00103	CAGTCATTTTTTTTTTTTGCTTTATTTAT
1283	ABI3VP1_tnt.VRN1_colamp_a_m1	VRN1	Switchgrass	3782	3800	+	17.0139	8.91e-07	0.00512	TTTTTTTTTTTTGCTTTAT
1284	ABI3VP1_tnt.VRN1_col_a_m1	VRN1	Switchgrass	770	798	+	2.47761	9e-07	0.00109	CGGTTTTTTTATTTTTTTATTTTTTATTT
1285	REM_tnt.REM19_colamp_a_m1	REM19	Switchgrass	778	798	-	16.7761	9.2e-07	0.00267	AAATAAAAAATAAAAAAATAA
1286	C2C2dof_tnt.AT1G69570_col_a_m1	AT1G69570	Switchgrass	1596	1622	-	16.8485	9.44e-07	0.0055	TCTTCTCTCTTTTCTTTTTTTTTCCTC
1287	BBRBPC_tnt.BPC5_colamp_a_m1	BPC5	Switchgrass	1598	1626	+	10.5366	9.76e-07	0.00301	GGAAAAAAAAAGAAAAGAGAGAAGAGGAA
1288	REM_tnt.REM19_colamp_a_m1	REM19	Switchgrass	791	811	-	16.6716	9.78e-07	0.00267	TTGTAAAAAACAAAAATAAAA
1289	ND_tnt.FRS9_col_a_m1	FRS9	Switchgrass	1119	1139	-	14.3788	9.97e-07	0.0029	CTCCCTCCCTCCCTCTTTTTT
1290	BBRBPC_tnt.BPC5_col_a_m1	BPC5	Switchgrass	1637	1666	+	-23.8553	1.05e-06	0.00615	GGAAGGAGAAAAAGAAAAGGAGGGAGCGAG
1291	BBRBPC_tnt.BPC5_colamp_a_m1	BPC5	Switchgrass	1111	1139	+	10.2683	1.07e-06	0.00309	AAACTAAGAAAAAAGAGGGAGGGAGGGAG
1292	BBRBPC_tnt.BPC5_col_a_m1	BPC5	Switchgrass	1643	1672	+	-24.2105	1.13e-06	0.00615	AGAAAAAGAAAAGGAGGGAGCGAGGATGAT
1293	BBRBPC_tnt.BPC5_col_a_m1	BPC5	Switchgrass	2366	2395	-	-24.2368	1.14e-06	0.00615	ACCTAGAGGGAGAGGGAGAGAGGGTACCAG
1294	BBRBPC_tnt.BPC5_col_a_m1	BPC5	Switchgrass	1116	1145	+	-24.25	1.14e-06	0.00615	AAGAAAAAAGAGGGAGGGAGGGAGAGAGGC
1295	REM_tnt.REM19_colamp_a_m1	REM19	Switchgrass	786	806	-	16.3731	1.16e-06	0.0029	AAAAACAAAAATAAAAAATAA
1296	BBRBPC_tnt.BPC1_colamp_a_m1	BPC1	Switchgrass	2374	2388	+	16.0455	1.17e-06	0.00791	CTCTCTCCCTCTCCC
1297	ND_tnt.FRS9_col_a_m1	FRS9	Switchgrass	2374	2394	+	13.8939	1.24e-06	0.00305	CTCTCTCCCTCTCCCTCTAGG
1298	REM_tnt.REM19_colamp_a_m1	REM19	Switchgrass	1596	1616	+	16.2537	1.24e-06	0.00296	GAGGAAAAAAAAAGAAAAGAG
1299	ABI3VP1_tnt.VRN1_col_a_m1	VRN1	Switchgrass	1597	1625	-	1.22388	1.25e-06	0.00135	TCCTCTTCTCTCTTTTCTTTTTTTTTCCT
1300	C2C2dof_tnt.OBP3_col_a_m1	OBP3	Switchgrass	3791	3811	+	16.3788	1.26e-06	0.00554	TTTGCTTTATTTATTTTCTTG
1301	BBRBPC_tnt.BPC1_col_a_m1	BPC1	Switchgrass	1596	1619	+	10.7727	1.26e-06	0.00375	GAGGAAAAAAAAAGAAAAGAGAGA
1302	BBRBPC_tnt.BPC1_col_a_m1	BPC1	Switchgrass	1117	1140	+	10.697	1.3e-06	0.00375	AGAAAAAAGAGGGAGGGAGGGAGA
1303	C2C2dof_tnt.OBP3_col_a_m1	OBP3	Switchgrass	1634	1654	-	16.3333	1.31e-06	0.00554	TTTTCTTTTTCTCCTTCCTCA
1304	REM_tnt.REM19_colamp_a_m1	REM19	Switchgrass	770	790	-	16.1493	1.32e-06	0.00303	AATAAAAAAATAAAAAAACCG
1305	BBRBPC_tnt.BPC5_colamp_a_m1	BPC5	Switchgrass	1622	1650	+	9.67073	1.32e-06	0.00351	AGGAAGAAGAAATGAGGAAGGAGAAAAAG
1306	BBRBPC_tnt.BPC5_colamp_a_m1	BPC5	Switchgrass	1640	1668	+	9.65854	1.33e-06	0.00351	AGGAGAAAAAGAAAAGGAGGGAGCGAGGA
1307	ABI3VP1_tnt.VRN1_colamp_a_m1	VRN1	Switchgrass	1594	1612	-	16.25	1.33e-06	0.00579	TTTCTTTTTTTTTCCTCTT
1308	REM_tnt.REM19_colamp_a_m1	REM19	Switchgrass	774	794	-	16.0896	1.36e-06	0.00303	AAAAAATAAAAAAATAAAAAA
1309	REM_tnt.REM19_col_a_m1	REM19	Switchgrass	3783	3797	-	16.5373	1.47e-06	0.00774	AAGCAAAAAAAAAAA
1310	C2C2dof_tnt.AT1G69570_colamp_a_m1	AT1G69570	Switchgrass	1596	1616	+	15.9242	1.53e-06	0.0283	GAGGAAAAAAAAAGAAAAGAG
1311	BBRBPC_tnt.BPC5_colamp_a_m1	BPC5	Switchgrass	1613	1641	+	9.23171	1.54e-06	0.0039	AGAGAGAAGAGGAAGAAGAAATGAGGAAG
1312	REM_tnt.REM19_colamp_a_m1	REM19	Switchgrass	771	791	-	15.8657	1.55e-06	0.0032	AAATAAAAAAATAAAAAAACC
1313	C2C2dof_tnt.AT1G69570_col_a_m1	AT1G69570	Switchgrass	1630	1656	-	16.1818	1.56e-06	0.00832	CCTTTTCTTTTTCTCCTTCCTCATTTC
1314	BBRBPC_tnt.BPC5_colamp_a_m1	BPC5	Switchgrass	1601	1629	+	9.0122	1.66e-06	0.00404	AAAAAAAAGAAAAGAGAGAAGAGGAAGAA
1315	REM_tnt.REM19_colamp_a_m1	REM19	Switchgrass	787	807	-	15.6866	1.71e-06	0.0032	AAAAAACAAAAATAAAAAATA
1316	REM_tnt.REM19_colamp_a_m1	REM19	Switchgrass	792	812	-	15.6418	1.75e-06	0.0032	TTTGTAAAAAACAAAAATAAA
1317	REM_tnt.REM19_colamp_a_m1	REM19	Switchgrass	782	802	-	15.597	1.79e-06	0.0032	ACAAAAATAAAAAATAAAAAA
1318	REM_tnt.REM19_col_a_m1	REM19	Switchgrass	1599	1613	+	16.2836	1.81e-06	0.00774	GAAAAAAAAAGAAAA
1319	C2C2dof_tnt.AT1G69570_col_a_m1	AT1G69570	Switchgrass	3789	3815	+	15.9394	1.86e-06	0.00852	TTTTTGCTTTATTTATTTTCTTGCAAA
1320	BBRBPC_tnt.BPC1_col_a_m1	BPC1	Switchgrass	1636	1659	+	9.71212	1.91e-06	0.00484	AGGAAGGAGAAAAAGAAAAGGAGG
1321	BBRBPC_tnt.BPC1_colamp_a_m1	BPC1	Switchgrass	2376	2390	+	15.0303	1.92e-06	0.00951	CTCTCCCTCTCCCTC
1322	REM_tnt.REM19_colamp_a_m1	REM19	Switchgrass	3779	3799	-	15.4328	1.96e-06	0.00324	TAAAGCAAAAAAAAAAAATGA
1323	REM_tnt.REM19_colamp_a_m1	REM19	Switchgrass	776	796	-	15.403	2e-06	0.00324	ATAAAAAATAAAAAAATAAAA
1324	ABI3VP1_tnt.VRN1_col_a_m1	VRN1	Switchgrass	3774	3802	+	-0.701493	2.05e-06	0.00194	TTCAGTCATTTTTTTTTTTTGCTTTATTT
1325	ABI3VP1_tnt.VRN1_col_a_m1	VRN1	Switchgrass	912	940	-	-0.701493	2.05e-06	0.00194	GCAATTTTTTGTCGTCTTTTTTTTCGAAT
1326	C2C2dof_tnt.At4g38000_col_a_m1	At4g38000	Switchgrass	1599	1626	-	15.7576	2.13e-06	0.00365	TTCCTCTTCTCTCTTTTCTTTTTTTTTC
1327	BBRBPC_tnt.BPC5_col_a_m1	BPC5	Switchgrass	1635	1664	+	-27.4605	2.16e-06	0.00927	GAGGAAGGAGAAAAAGAAAAGGAGGGAGCG
1328	ABI3VP1_tnt.VRN1_col_a_m1	VRN1	Switchgrass	3770	3798	+	-0.955224	2.18e-06	0.00197	TTGTTTCAGTCATTTTTTTTTTTTGCTTT
1329	REM_tnt.REM19_colamp_a_m1	REM19	Switchgrass	1594	1614	+	15.209	2.22e-06	0.00332	AAGAGGAAAAAAAAAGAAAAG
1330	C2C2dof_tnt.At4g38000_col_a_m1	At4g38000	Switchgrass	1601	1628	-	15.697	2.23e-06	0.00372	TCTTCCTCTTCTCTCTTTTCTTTTTTTT
1331	BBRBPC_tnt.BPC1_col_a_m1	BPC1	Switchgrass	3137	3160	+	9.21212	2.31e-06	0.00552	GATAGAGACAGACAGACAGACAGA
1332	BBRBPC_tnt.BPC1_col_a_m1	BPC1	Switchgrass	1594	1617	+	9.16667	2.35e-06	0.00552	AAGAGGAAAAAAAAAGAAAAGAGA
1333	C2C2dof_tnt.OBP3_col_a_m1	OBP3	Switchgrass	3784	3804	+	15.6061	2.36e-06	0.00733	TTTTTTTTTTGCTTTATTTAT
1334	BBRBPC_tnt.BPC5_colamp_a_m1	BPC5	Switchgrass	2376	2404	-	7.84146	2.46e-06	0.00519	ATGATGATGACCTAGAGGGAGAGGGAGAG
1335	C2C2dof_tnt.OBP3_col_a_m1	OBP3	Switchgrass	1639	1659	-	15.5152	2.54e-06	0.00733	CCTCCTTTTCTTTTTCTCCTT
1336	BBRBPC_tnt.BPC5_colamp_a_m1	BPC5	Switchgrass	1599	1627	+	7.69512	2.58e-06	0.00521	GAAAAAAAAAGAAAAGAGAGAAGAGGAAG
1337	REM_tnt.REM19_col_a_m1	REM19	Switchgrass	1598	1612	+	15.791	2.61e-06	0.00774	GGAAAAAAAAAGAAA
1338	BBRBPC_tnt.BPC5_col_a_m1	BPC5	Switchgrass	1124	1153	+	-28.5789	2.63e-06	0.0102	AGAGGGAGGGAGGGAGAGAGGCGAAGCCCT
1339	BBRBPC_tnt.BPC5_colamp_a_m1	BPC5	Switchgrass	1586	1614	+	7.63415	2.63e-06	0.00521	GAATCAAGAAGAGGAAAAAAAAAGAAAAG
1340	BBRBPC_tnt.BPC5_col_a_m1	BPC5	Switchgrass	1639	1668	+	-28.6842	2.68e-06	0.0102	AAGGAGAAAAAGAAAAGGAGGGAGCGAGGA
1341	C2C2dof_tnt.AT1G69570_colamp_a_m1	AT1G69570	Switchgrass	1591	1611	+	15.303	2.71e-06	0.0323	AAGAAGAGGAAAAAAAAAGAA
1342	ND_tnt.FRS9_col_a_m1	FRS9	Switchgrass	613	633	+	12.0758	2.72e-06	0.00579	CTCCTCTCCTCTCTCTCTGCT
1343	REM_tnt.REM19_col_a_m1	REM19	Switchgrass	3784	3798	-	15.7015	2.77e-06	0.00786	AAAGCAAAAAAAAAA
1344	BBRBPC_tnt.BPC1_col_a_m1	BPC1	Switchgrass	2367	2390	-	8.72727	2.78e-06	0.00629	GAGGGAGAGGGAGAGAGGGTACCA
1345	C2C2dof_tnt.At4g38000_col_a_m1	At4g38000	Switchgrass	1608	1635	-	15.3485	2.86e-06	0.0043	CATTTCTTCTTCCTCTTCTCTCTTTTCT
1346	C2C2dof_tnt.OBP3_col_a_m1	OBP3	Switchgrass	772	792	+	15.3636	2.86e-06	0.00733	GTTTTTTTATTTTTTTATTTT
1347	C2C2dof_tnt.At4g38000_col_a_m1	At4g38000	Switchgrass	770	797	+	15.3182	2.92e-06	0.0043	CGGTTTTTTTATTTTTTTATTTTTTATT
1348	C2C2dof_tnt.OBP3_col_a_m1	OBP3	Switchgrass	3782	3802	+	15.3333	2.93e-06	0.00733	TTTTTTTTTTTTGCTTTATTT
1349	C2C2dof_tnt.OBP3_col_a_m1	OBP3	Switchgrass	3778	3798	+	15.303	3e-06	0.00733	GTCATTTTTTTTTTTTGCTTT
1350	C2C2dof_tnt.OBP3_colamp_a_m1	OBP3	Switchgrass	1603	1621	-	14.7121	3e-06	0.0253	CTTCTCTCTTTTCTTTTTT
1351	REM_tnt.REM19_col_a_m1	REM19	Switchgrass	789	803	-	15.5672	3.03e-06	0.00792	AACAAAAATAAAAAA
1352	BBRBPC_tnt.BPC1_col_a_m1	BPC1	Switchgrass	1638	1661	+	8.45455	3.08e-06	0.00629	GAAGGAGAAAAAGAAAAGGAGGGA
1353	BBRBPC_tnt.BPC5_col_a_m1	BPC5	Switchgrass	3130	3159	+	-29.4342	3.11e-06	0.0111	TCAATTTGATAGAGACAGACAGACAGACAG
1354	REM_tnt.REM19_colamp_a_m1	REM19	Switchgrass	3777	3797	-	14.4925	3.25e-06	0.00435	AAGCAAAAAAAAAAAATGACT
1355	BBRBPC_tnt.BPC5_colamp_a_m1	BPC5	Switchgrass	2374	2402	-	6.9878	3.25e-06	0.00624	GATGATGACCTAGAGGGAGAGGGAGAGAG
1356	ABI3VP1_tnt.VRN1_col_a_m1	VRN1	Switchgrass	1595	1623	-	-2.58209	3.27e-06	0.00261	CTCTTCTCTCTTTTCTTTTTTTTTCCTCT
1357	BBRBPC_tnt.BPC5_col_a_m1	BPC5	Switchgrass	3134	3163	+	-29.7632	3.33e-06	0.0113	TTTGATAGAGACAGACAGACAGACAGACAC
1358	ABI3VP1_tnt.VRN1_colamp_a_m1	VRN1	Switchgrass	1593	1611	-	14.3333	3.33e-06	0.0102	TTCTTTTTTTTTCCTCTTC
1359	C2C2dof_tnt.AT5G66940_colamp_a_m1	AT5G66940	Switchgrass	1597	1617	-	15.0909	3.36e-06	0.0403	TCTCTTTTCTTTTTTTTTCCT
1360	ND_tnt.FRS9_col_a_m1	FRS9	Switchgrass	615	635	+	11.5	3.45e-06	0.00712	CCTCTCCTCTCTCTCTGCTTT
1361	C2C2dof_tnt.AT1G69570_colamp_a_m1	AT1G69570	Switchgrass	1637	1657	+	15	3.53e-06	0.0329	GGAAGGAGAAAAAGAAAAGGA
1362	ABI3VP1_tnt.VRN1_col_a_m1	VRN1	Switchgrass	3773	3801	+	-2.91045	3.54e-06	0.00267	TTTCAGTCATTTTTTTTTTTTGCTTTATT
1363	ABI3VP1_tnt.VRN1_col_a_m1	VRN1	Switchgrass	1586	1614	-	-2.9403	3.56e-06	0.00267	CTTTTCTTTTTTTTTCCTCTTCTTGATTC
1364	ABI3VP1_tnt.VRN1_col_a_m1	VRN1	Switchgrass	4501	4529	-	-2.9403	3.56e-06	0.00267	AGTTTTGTTCTTTCGTTTGTTTTCTTGCT
1365	C2H2_tnt.TF3A_col_a_m1	TF3A	Switchgrass	2372	2390	+	14.544	3.68e-06	0.0148	CCCTCTCTCCCTCTCCCTC
1366	BBRBPC_tnt.BPC5_col_a_m1	BPC5	Switchgrass	2360	2389	-	-30.3553	3.77e-06	0.0121	AGGGAGAGGGAGAGAGGGTACCAGCCATAC
1367	REM_tnt.REM19_col_a_m1	REM19	Switchgrass	772	786	-	15.209	3.81e-06	0.00867	AAAAAATAAAAAAAC
1368	ABI3VP1_tnt.VRN1_col_a_m1	VRN1	Switchgrass	3778	3806	+	-3.23881	3.83e-06	0.00276	GTCATTTTTTTTTTTTGCTTTATTTATTT
1369	REM_tnt.REM19_col_a_m1	REM19	Switchgrass	791	805	-	15.194	3.85e-06	0.00867	AAAACAAAAATAAAA
1370	ABI3VP1_tnt.VRN1_col_a_m1	VRN1	Switchgrass	3777	3805	+	-3.26866	3.86e-06	0.00276	AGTCATTTTTTTTTTTTGCTTTATTTATT
1371	BBRBPC_tnt.BPC1_col_a_m1	BPC1	Switchgrass	1644	1667	+	7.78788	3.94e-06	0.0078	GAAAAAGAAAAGGAGGGAGCGAGG
1372	ND_tnt.FRS9_col_a_m1	FRS9	Switchgrass	2376	2396	+	11.1515	3.98e-06	0.00776	CTCTCCCTCTCCCTCTAGGTC
1373	ABI3VP1_tnt.VRN1_col_a_m1	VRN1	Switchgrass	784	812	+	-3.53731	4.11e-06	0.00291	TTTTATTTTTTATTTTTGTTTTTTACAAA
1374	ABI3VP1_tnt.VRN1_colamp_a_m1	VRN1	Switchgrass	3777	3795	+	13.8333	4.16e-06	0.0105	AGTCATTTTTTTTTTTTGC
1375	C2C2dof_tnt.At4g38000_col_a_m1	At4g38000	Switchgrass	768	795	+	14.7273	4.4e-06	0.00592	AGCGGTTTTTTTATTTTTTTATTTTTTA
1376	REM_tnt.REM19_colamp_a_m1	REM19	Switchgrass	788	808	-	13.8806	4.46e-06	0.00503	TAAAAAACAAAAATAAAAAAT
1377	REM_tnt.REM19_col_a_m1	REM19	Switchgrass	780	794	-	14.9552	4.46e-06	0.00911	AAAAAATAAAAAAAT
1378	BBRBPC_tnt.BPC5_col_a_m1	BPC5	Switchgrass	2374	2403	-	-31.2105	4.5e-06	0.0121	TGATGATGACCTAGAGGGAGAGGGAGAGAG
1379	BBRBPC_tnt.BPC5_col_a_m1	BPC5	Switchgrass	1112	1141	+	-31.2368	4.52e-06	0.0121	AACTAAGAAAAAAGAGGGAGGGAGGGAGAG
1380	C2C2dof_tnt.At4g38000_col_a_m1	At4g38000	Switchgrass	3781	3808	+	14.6818	4.53e-06	0.00592	ATTTTTTTTTTTTGCTTTATTTATTTTC
1381	ABI3VP1_tnt.VRN1_colamp_a_m1	VRN1	Switchgrass	1596	1614	-	13.6111	4.58e-06	0.0105	CTTTTCTTTTTTTTTCCTC
1382	C2H2_tnt.TF3A_col_a_m1	TF3A	Switchgrass	1644	1662	-	14.144	4.71e-06	0.0178	CTCCCTCCTTTTCTTTTTC
1383	BBRBPC_tnt.BPC5_colamp_a_m1	BPC5	Switchgrass	1585	1613	+	5.76829	4.8e-06	0.00822	TGAATCAAGAAGAGGAAAAAAAAAGAAAA
1384	BBRBPC_tnt.BPC5_col_a_m1	BPC5	Switchgrass	2372	2401	-	-31.5789	4.83e-06	0.0125	ATGATGACCTAGAGGGAGAGGGAGAGAGGG
1385	REM_tnt.REM19_col_a_m1	REM19	Switchgrass	1596	1610	+	14.8209	4.9e-06	0.0093	GAGGAAAAAAAAAGA
1386	BBRBPC_tnt.BPC1_colamp_a_m1	BPC1	Switchgrass	1129	1143	-	13.0152	4.96e-06	0.0164	CTCTCTCCCTCCCTC
1387	ABI3VP1_tnt.VRN1_col_a_m1	VRN1	Switchgrass	3765	3793	+	-4.32836	4.96e-06	0.00348	ATTGGTTGTTTCAGTCATTTTTTTTTTTT
1388	REM_tnt.REM19_col_a_m1	REM19	Switchgrass	775	789	-	14.791	4.98e-06	0.0093	ATAAAAAAATAAAAA
1389	BBRBPC_tnt.BPC5_colamp_a_m1	BPC5	Switchgrass	1627	1655	+	5.60976	5.04e-06	0.00822	GAAGAAATGAGGAAGGAGAAAAAGAAAAG
1390	C2H2_tnt.TF3A_col_a_m1	TF3A	Switchgrass	415	433	-	13.992	5.17e-06	0.0185	CCTCCTCCGCCGCCGCCTA
1391	ABI3VP1_tnt.VRN1_col_a_m1	VRN1	Switchgrass	1241	1269	+	-4.50746	5.18e-06	0.00359	AATTATTTTTGTTATAATTATTTTTGTTG
1392	C2C2dof_tnt.OBP3_col_a_m1	OBP3	Switchgrass	1591	1611	-	14.5758	5.19e-06	0.0103	TTCTTTTTTTTTCCTCTTCTT
1393	C2C2dof_tnt.OBP3_col_a_m1	OBP3	Switchgrass	3783	3803	+	14.5758	5.19e-06	0.0103	TTTTTTTTTTTGCTTTATTTA
1394	BBRBPC_tnt.BPC1_col_a_m1	BPC1	Switchgrass	3133	3156	+	7	5.25e-06	0.00915	ATTTGATAGAGACAGACAGACAGA
1395	BBRBPC_tnt.BPC5_colamp_a_m1	BPC5	Switchgrass	2370	2398	-	5.47561	5.26e-06	0.00822	ATGACCTAGAGGGAGAGGGAGAGAGGGTA
1396	ABI3VP1_tnt.VRN1_colamp_a_m1	VRN1	Switchgrass	1600	1618	-	13.1111	5.66e-06	0.011	CTCTCTTTTCTTTTTTTTT
1397	C2H2_tnt.TF3A_col_a_m1	TF3A	Switchgrass	433	451	-	13.84	5.67e-06	0.0188	GCCGCCCCTCCTCCTCCTC
1398	BBRBPC_tnt.BPC5_col_a_m1	BPC5	Switchgrass	2368	2397	-	-32.5	5.71e-06	0.0137	TGACCTAGAGGGAGAGGGAGAGAGGGTACC
1399	ND_tnt.FRS9_col_a_m1	FRS9	Switchgrass	1644	1664	-	10.1818	5.87e-06	0.0107	CGCTCCCTCCTTTTCTTTTTC
1400	BBRBPC_tnt.BPC5_colamp_a_m1	BPC5	Switchgrass	1583	1611	+	5.08537	5.94e-06	0.00852	CATGAATCAAGAAGAGGAAAAAAAAAGAA
1401	C2C2dof_tnt.At4g38000_col_a_m1	At4g38000	Switchgrass	1590	1617	-	14.2576	6.03e-06	0.00682	TCTCTTTTCTTTTTTTTTCCTCTTCTTG
1402	REM_tnt.REM19_colamp_a_m1	REM19	Switchgrass	138	158	-	13.2687	6.06e-06	0.00591	GATTTAAAAAAAATAAAACTT
1403	BBRBPC_tnt.BPC5_col_a_m1	BPC5	Switchgrass	1114	1143	+	-32.8816	6.09e-06	0.0137	CTAAGAAAAAAGAGGGAGGGAGGGAGAGAG
1404	ND_tnt.FRS9_col_a_m1	FRS9	Switchgrass	1636	1656	-	10.0758	6.12e-06	0.0109	CCTTTTCTTTTTCTCCTTCCT
1405	BBRBPC_tnt.BPC5_col_a_m1	BPC5	Switchgrass	3138	3167	+	-32.9474	6.16e-06	0.0137	ATAGAGACAGACAGACAGACAGACACAATT
1406	ABI3VP1_tnt.VRN1_col_a_m1	VRN1	Switchgrass	3771	3799	+	-5.32836	6.28e-06	0.00394	TGTTTCAGTCATTTTTTTTTTTTGCTTTA
1407	BBRBPC_tnt.BPC5_colamp_a_m1	BPC5	Switchgrass	1619	1647	+	4.90244	6.28e-06	0.00866	AAGAGGAAGAAGAAATGAGGAAGGAGAAA
1408	ABI3VP1_tnt.VRN1_col_a_m1	VRN1	Switchgrass	1588	1616	-	-5.38806	6.36e-06	0.00394	CTCTTTTCTTTTTTTTTCCTCTTCTTGAT
1409	C2H2_tnt.TF3A_col_a_m1	TF3A	Switchgrass	1618	1636	-	13.632	6.42e-06	0.0197	TCATTTCTTCTTCCTCTTC
1410	ABI3VP1_tnt.VRN1_col_a_m1	VRN1	Switchgrass	1602	1630	-	-5.43284	6.43e-06	0.00394	CTTCTTCCTCTTCTCTCTTTTCTTTTTTT
1411	REM_tnt.REM19_col_a_m1	REM19	Switchgrass	1597	1611	+	14.403	6.48e-06	0.0106	AGGAAAAAAAAAGAA
1412	BBRBPC_tnt.BPC1_col_a_m1	BPC1	Switchgrass	1608	1631	+	6.39394	6.52e-06	0.00979	AGAAAAGAGAGAAGAGGAAGAAGA
1413	ABI3VP1_tnt.VRN1_col_a_m1	VRN1	Switchgrass	761	789	+	-5.52239	6.56e-06	0.00397	TTTCATCAGCGGTTTTTTTATTTTTTTAT
1414	BBRBPC_tnt.BPC5_colamp_a_m1	BPC5	Switchgrass	1638	1666	+	4.7561	6.57e-06	0.00886	GAAGGAGAAAAAGAAAAGGAGGGAGCGAG
1415	BBRBPC_tnt.BPC1_col_a_m1	BPC1	Switchgrass	1628	1651	+	6.33333	6.66e-06	0.00979	AAGAAATGAGGAAGGAGAAAAAGA
1416	C2C2dof_tnt.OBP3_col_a_m1	OBP3	Switchgrass	779	799	+	14.2273	6.68e-06	0.0121	TATTTTTTTATTTTTTATTTT
1417	REM_tnt.REM19_colamp_a_m1	REM19	Switchgrass	3795	3815	-	13.0299	6.82e-06	0.00646	TTTGCAAGAAAATAAATAAAG
1418	BBRBPC_tnt.BPC5_colamp_a_m1	BPC5	Switchgrass	1590	1618	+	4.62195	6.85e-06	0.00904	CAAGAAGAGGAAAAAAAAAGAAAAGAGAG
1419	ABI3VP1_tnt.VRN1_colamp_a_m1	VRN1	Switchgrass	791	809	+	12.625	6.91e-06	0.012	TTTTATTTTTGTTTTTTAC
1420	C2C2dof_tnt.At4g38000_col_a_m1	At4g38000	Switchgrass	774	801	+	13.9848	7.21e-06	0.00761	TTTTTTATTTTTTTATTTTTTATTTTTG
1421	C2C2dof_tnt.At4g38000_col_a_m1	At4g38000	Switchgrass	1598	1625	-	13.9848	7.21e-06	0.00761	TCCTCTTCTCTCTTTTCTTTTTTTTTCC
1422	C2H2_tnt.TF3A_col_a_m1	TF3A	Switchgrass	523	541	-	13.392	7.41e-06	0.0201	CCTCCGCCGCTGCCTCCAC
1423	ABI3VP1_tnt.VRN1_col_a_m1	VRN1	Switchgrass	3779	3807	+	-6.07463	7.46e-06	0.00436	TCATTTTTTTTTTTTGCTTTATTTATTTT
1424	ABI3VP1_tnt.VRN1_col_a_m1	VRN1	Switchgrass	1587	1615	-	-6.08955	7.48e-06	0.00436	TCTTTTCTTTTTTTTTCCTCTTCTTGATT
1425	ABI3VP1_tnt.VRN1_col_a_m1	VRN1	Switchgrass	1243	1271	+	-6.19403	7.66e-06	0.00442	TTATTTTTGTTATAATTATTTTTGTTGAA
1426	BBRBPC_tnt.BPC5_colamp_a_m1	BPC5	Switchgrass	2378	2406	-	4.2439	7.69e-06	0.00994	TGATGATGATGACCTAGAGGGAGAGGGAG
1427	BBRBPC_tnt.BPC1_col_a_m1	BPC1	Switchgrass	1115	1138	+	5.83333	7.95e-06	0.0103	TAAGAAAAAAGAGGGAGGGAGGGA
1428	BBRBPC_tnt.BPC5_colamp_a_m1	BPC5	Switchgrass	1602	1630	+	4.12195	7.97e-06	0.0101	AAAAAAAGAAAAGAGAGAAGAGGAAGAAG
1429	BBRBPC_tnt.BPC1_col_a_m1	BPC1	Switchgrass	1129	1152	+	5.81818	7.99e-06	0.0103	GAGGGAGGGAGAGAGGCGAAGCCC
1430	REM_tnt.REM19_colamp_a_m1	REM19	Switchgrass	1597	1617	+	12.7015	8.01e-06	0.00687	AGGAAAAAAAAAGAAAAGAGA
1431	ABI3VP1_tnt.VRN1_colamp_a_m1	VRN1	Switchgrass	1595	1613	-	12.2361	8.08e-06	0.0128	TTTTCTTTTTTTTTCCTCT
1432	C2H2_tnt.TF3A_col_a_m1	TF3A	Switchgrass	1612	1630	-	13.216	8.22e-06	0.0204	CTTCTTCCTCTTCTCTCTT
1433	ABI3VP1_tnt.VRN1_col_a_m1	VRN1	Switchgrass	3775	3803	+	-6.55224	8.32e-06	0.00471	TCAGTCATTTTTTTTTTTTGCTTTATTTA
1434	C2C2dof_tnt.At4g38000_col_a_m1	At4g38000	Switchgrass	769	796	+	13.7424	8.43e-06	0.00876	GCGGTTTTTTTATTTTTTTATTTTTTAT
1435	ABI3VP1_tnt.VRN1_col_a_m1	VRN1	Switchgrass	764	792	+	-6.64179	8.49e-06	0.00477	CATCAGCGGTTTTTTTATTTTTTTATTTT
1436	BBRBPC_tnt.BPC5_col_a_m1	BPC5	Switchgrass	2362	2391	-	-34.9868	8.69e-06	0.0164	AGAGGGAGAGGGAGAGAGGGTACCAGCCAT
1437	BBRBPC_tnt.BPC1_colamp_a_m1	BPC1	Switchgrass	2370	2384	+	11.7121	8.7e-06	0.0225	TACCCTCTCTCCCTC
1438	ABI3VP1_tnt.VRN1_col_a_m1	VRN1	Switchgrass	1593	1621	-	-6.8209	8.84e-06	0.00483	CTTCTCTCTTTTCTTTTTTTTTCCTCTTC
1439	BBRBPC_tnt.BPC5_colamp_a_m1	BPC5	Switchgrass	1596	1624	+	3.7561	8.9e-06	0.0107	GAGGAAAAAAAAAGAAAAGAGAGAAGAGG
1440	BBRBPC_tnt.BPC1_col_a_m1	BPC1	Switchgrass	2373	2396	-	5.48485	8.98e-06	0.0109	GACCTAGAGGGAGAGGGAGAGAGG
1441	REM_tnt.REM19_colamp_a_m1	REM19	Switchgrass	1600	1620	+	12.4627	8.98e-06	0.00754	AAAAAAAAAGAAAAGAGAGAA
1442	ND_tnt.FRS9_col_a_m1	FRS9	Switchgrass	1127	1147	-	9.07576	9.01e-06	0.0141	TCGCCTCTCTCCCTCCCTCCC
1443	ABI3VP1_tnt.VRN1_col_a_m1	VRN1	Switchgrass	913	941	-	-6.92537	9.05e-06	0.00491	TGCAATTTTTTGTCGTCTTTTTTTTCGAA
1444	REM_tnt.REM19_colamp_a_m1	REM19	Switchgrass	137	157	-	12.4179	9.18e-06	0.00754	ATTTAAAAAAAATAAAACTTT
1445	C2C2dof_tnt.AT1G69570_col_a_m1	AT1G69570	Switchgrass	1603	1629	-	13.5606	9.33e-06	0.0284	TTCTTCCTCTTCTCTCTTTTCTTTTTT
1446	ABI3VP1_tnt.VRN1_col_a_m1	VRN1	Switchgrass	915	943	-	-7.0597	9.33e-06	0.00497	TCTGCAATTTTTTGTCGTCTTTTTTTTCG
1447	C2C2dof_tnt.OBP3_colamp_a_m1	OBP3	Switchgrass	919	937	-	13.6061	9.35e-06	0.0303	ATTTTTTGTCGTCTTTTTT
1448	C2C2dof_tnt.OBP3_col_a_m1	OBP3	Switchgrass	1588	1608	-	13.7424	9.39e-06	0.0149	TTTTTTTTTCCTCTTCTTGAT
1449	REM_tnt.REM19_col_a_m1	REM19	Switchgrass	790	804	-	13.7313	9.64e-06	0.014	AAACAAAAATAAAAA
1450	C2C2dof_tnt.OBP3_col_a_m1	OBP3	Switchgrass	780	800	+	13.697	9.68e-06	0.015	ATTTTTTTATTTTTTATTTTT
1451	REM_tnt.REM19_colamp_a_m1	REM19	Switchgrass	1591	1611	+	12.2687	9.86e-06	0.00773	AAGAAGAGGAAAAAAAAAGAA
1452	ND_tnt.FRS9_col_a_m1	FRS9	Switchgrass	2368	2388	+	8.81818	9.94e-06	0.0151	GGTACCCTCTCTCCCTCTCCC
1453	BBRBPC_tnt.BPC5_col_a_m1	BPC5	Switchgrass	1591	1620	+	-35.75	1e-05	0.0167	AAGAAGAGGAAAAAAAAAGAAAAGAGAGAA
1454	C2C2dof_tnt.At4g38000_col_a_m1	At4g38000	Switchgrass	1610	1637	-	13.4545	1.01e-05	0.01	CTCATTTCTTCTTCCTCTTCTCTCTTTT
1455	REM_tnt.REM19_colamp_a_m1	REM19	Switchgrass	3781	3801	-	12.194	1.02e-05	0.00792	AATAAAGCAAAAAAAAAAAAT
1456	C2C2dof_tnt.AT5G66940_col_a_m1	AT5G66940	Switchgrass	785	813	+	13.5303	1.04e-05	0.0229	TTTATTTTTTATTTTTGTTTTTTACAAAA
1457	REM_tnt.REM19_colamp_a_m1	REM19	Switchgrass	1595	1615	+	12.1045	1.07e-05	0.00812	AGAGGAAAAAAAAAGAAAAGA
1458	BBRBPC_tnt.BPC5_col_a_m1	BPC5	Switchgrass	2364	2393	-	-36.0658	1.07e-05	0.0168	CTAGAGGGAGAGGGAGAGAGGGTACCAGCC
1459	BBRBPC_tnt.BPC1_colamp_a_m1	BPC1	Switchgrass	619	633	+	11.2424	1.07e-05	0.0245	TCCTCTCTCTCTGCT
1460	C2C2dof_tnt.AT5G66940_col_a_m1	AT5G66940	Switchgrass	1584	1612	-	13.4545	1.09e-05	0.0233	TTTCTTTTTTTTTCCTCTTCTTGATTCAT
1461	REM_tnt.REM19_colamp_a_m1	REM19	Switchgrass	781	801	-	12.0448	1.1e-05	0.0082	CAAAAATAAAAAATAAAAAAA
1462	ABI3VP1_tnt.VRN1_col_a_m1	VRN1	Switchgrass	3781	3809	+	-7.83582	1.11e-05	0.00534	ATTTTTTTTTTTTGCTTTATTTATTTTCT
1463	BBRBPC_tnt.BPC1_col_a_m1	BPC1	Switchgrass	1127	1150	+	4.86364	1.11e-05	0.0128	GGGAGGGAGGGAGAGAGGCGAAGC
1464	BBRBPC_tnt.BPC5_colamp_a_m1	BPC5	Switchgrass	1594	1622	+	2.97561	1.12e-05	0.0123	AAGAGGAAAAAAAAAGAAAAGAGAGAAGA
1465	BBRBPC_tnt.BPC5_colamp_a_m1	BPC5	Switchgrass	457	485	+	2.86585	1.16e-05	0.0125	GTGGGGAAATGAGGAAGAGGATAAGGGAG
1466	C2H2_tnt.TF3A_col_a_m1	TF3A	Switchgrass	470	488	-	12.592	1.18e-05	0.0282	CGCCTCCCTTATCCTCTTC
1467	BBRBPC_tnt.BPC1_colamp_a_m1	BPC1	Switchgrass	615	629	+	10.9545	1.2e-05	0.0258	CCTCTCCTCTCTCTC
1468	C2C2dof_tnt.AT5G66940_col_a_m1	AT5G66940	Switchgrass	1638	1666	-	13.2424	1.25e-05	0.0258	CTCGCTCCCTCCTTTTCTTTTTCTCCTTC
1469	ND_tnt.FRS9_col_a_m1	FRS9	Switchgrass	611	631	+	8.19697	1.25e-05	0.0182	TCCTCCTCTCCTCTCTCTCTG
1470	BBRBPC_tnt.BPC5_colamp_a_m1	BPC5	Switchgrass	1642	1670	+	2.4878	1.3e-05	0.0135	GAGAAAAAGAAAAGGAGGGAGCGAGGATG
1471	BBRBPC_tnt.BPC1_col_a_m1	BPC1	Switchgrass	2184	2207	+	4.39394	1.31e-05	0.0147	CACTAAGAGAGAAGGGAAAGAAGA
1472	ABI3VP1_tnt.VRN1_col_a_m1	VRN1	Switchgrass	3783	3811	+	-8.58209	1.31e-05	0.00575	TTTTTTTTTTTGCTTTATTTATTTTCTTG
1473	C2C2dof_tnt.AT1G69570_col_a_m1	AT1G69570	Switchgrass	1635	1661	-	13	1.32e-05	0.0325	TCCCTCCTTTTCTTTTTCTCCTTCCTC
1474	REM_tnt.REM19_col_a_m1	REM19	Switchgrass	1595	1609	+	13.1642	1.33e-05	0.0158	AGAGGAAAAAAAAAG
1475	BBRBPC_tnt.BPC1_colamp_a_m1	BPC1	Switchgrass	1610	1624	-	10.7121	1.34e-05	0.0279	CCTCTTCTCTCTTTT
1476	ABI3VP1_tnt.VRN1_col_a_m1	VRN1	Switchgrass	3768	3796	+	-8.71642	1.35e-05	0.00588	GGTTGTTTCAGTCATTTTTTTTTTTTGCT
1477	REM_tnt.REM19_col_a_m1	REM19	Switchgrass	782	796	-	13.0746	1.41e-05	0.0159	ATAAAAAATAAAAAA
1478	ABI3VP1_tnt.VRN1_col_a_m1	VRN1	Switchgrass	3769	3797	+	-8.91045	1.41e-05	0.00601	GTTGTTTCAGTCATTTTTTTTTTTTGCTT
1479	BBRBPC_tnt.BPC5_colamp_a_m1	BPC5	Switchgrass	1628	1656	+	2.19512	1.41e-05	0.0138	AAGAAATGAGGAAGGAGAAAAAGAAAAGG
1480	C2C2dof_tnt.OBP3_col_a_m1	OBP3	Switchgrass	784	804	+	13.1061	1.44e-05	0.0202	TTTTATTTTTTATTTTTGTTT
1481	REM_tnt.REM19_col_a_m1	REM19	Switchgrass	1600	1614	+	13.0299	1.44e-05	0.0159	AAAAAAAAAGAAAAG
1482	C2C2dof_tnt.AT1G69570_col_a_m1	AT1G69570	Switchgrass	1636	1662	-	12.8333	1.46e-05	0.0333	CTCCCTCCTTTTCTTTTTCTCCTTCCT
1483	REM_tnt.REM19_col_a_m1	REM19	Switchgrass	795	809	-	13	1.47e-05	0.0159	GTAAAAAACAAAAAT
1484	BBRBPC_tnt.BPC1_colamp_a_m1	BPC1	Switchgrass	1121	1135	-	10.4545	1.47e-05	0.0297	CTCCCTCCCTCTTTT
1485	REM_tnt.REM19_col_a_m1	REM19	Switchgrass	773	787	-	12.9851	1.48e-05	0.0159	AAAAAAATAAAAAAA
1486	ABI3VP1_tnt.VRN1_col_a_m1	VRN1	Switchgrass	3782	3810	+	-9.14925	1.48e-05	0.00625	TTTTTTTTTTTTGCTTTATTTATTTTCTT
1487	ABI3VP1_tnt.VRN1_col_a_m1	VRN1	Switchgrass	3764	3792	+	-9.19403	1.5e-05	0.00625	TATTGGTTGTTTCAGTCATTTTTTTTTTT
1488	C2C2dof_tnt.OBP3_col_a_m1	OBP3	Switchgrass	1590	1610	-	13.0303	1.51e-05	0.0202	TCTTTTTTTTTCCTCTTCTTG
1489	ND_tnt.FRS9_col_a_m1	FRS9	Switchgrass	617	637	+	7.68182	1.52e-05	0.0195	TCTCCTCTCTCTCTGCTTTCT
1490	ABI3VP1_tnt.VRN1_col_a_m1	VRN1	Switchgrass	1589	1617	-	-9.32836	1.54e-05	0.00637	TCTCTTTTCTTTTTTTTTCCTCTTCTTGA
1491	ND_tnt.FRS9_col_a_m1	FRS9	Switchgrass	1593	1613	-	7.57576	1.57e-05	0.0195	TTTTCTTTTTTTTTCCTCTTC
1492	C2C2dof_tnt.At4g38000_col_a_m1	At4g38000	Switchgrass	1593	1620	-	12.7424	1.58e-05	0.0135	TTCTCTCTTTTCTTTTTTTTTCCTCTTC
1493	BBRBPC_tnt.BPC1_col_a_m1	BPC1	Switchgrass	1602	1625	+	3.78788	1.6e-05	0.0156	AAAAAAAGAAAAGAGAGAAGAGGA
1494	BBRBPC_tnt.BPC5_colamp_a_m1	BPC5	Switchgrass	1595	1623	+	1.7439	1.61e-05	0.0152	AGAGGAAAAAAAAAGAAAAGAGAGAAGAG
1495	C2H2_tnt.TF3A_col_a_m1	TF3A	Switchgrass	1635	1653	-	12.04	1.62e-05	0.0317	TTTCTTTTTCTCCTTCCTC
1496	C2C2dof_tnt.AT5G66940_col_a_m1	AT5G66940	Switchgrass	1594	1622	-	12.8182	1.64e-05	0.0317	TCTTCTCTCTTTTCTTTTTTTTTCCTCTT
1497	C2H2_tnt.TF3A_col_a_m1	TF3A	Switchgrass	261	279	-	11.992	1.67e-05	0.0317	GCCCCTCCCCGTCCTCCGC
1498	ABI3VP1_tnt.VRN1_col_a_m1	VRN1	Switchgrass	1598	1626	-	-9.73134	1.68e-05	0.00673	TTCCTCTTCTCTCTTTTCTTTTTTTTTCC
1499	BBRBPC_tnt.BPC5_colamp_a_m1	BPC5	Switchgrass	1625	1653	+	1.5122	1.72e-05	0.016	AAGAAGAAATGAGGAAGGAGAAAAAGAAA
1500	ABI3VP1_tnt.VRN1_col_a_m1	VRN1	Switchgrass	3766	3794	+	-9.8209	1.72e-05	0.00673	TTGGTTGTTTCAGTCATTTTTTTTTTTTG
1501	BBRBPC_tnt.BPC1_colamp_a_m1	BPC1	Switchgrass	1642	1656	-	10.0909	1.72e-05	0.0332	CCTTTTCTTTTTCTC
1502	BBRBPC_tnt.BPC5_col_a_m1	BPC5	Switchgrass	2370	2399	-	-38.7895	1.76e-05	0.0246	GATGACCTAGAGGGAGAGGGAGAGAGGGTA
1503	C2C2dof_tnt.At4g38000_col_a_m1	At4g38000	Switchgrass	1644	1671	-	12.5606	1.76e-05	0.0145	TCATCCTCGCTCCCTCCTTTTCTTTTTC
1504	C2H2_tnt.TF3A_col_a_m1	TF3A	Switchgrass	1609	1627	-	11.888	1.77e-05	0.0317	CTTCCTCTTCTCTCTTTTC
1505	REM_tnt.REM19_colamp_a_m1	REM19	Switchgrass	3783	3803	-	11	1.78e-05	0.0106	TAAATAAAGCAAAAAAAAAAA
1506	C2C2dof_tnt.At4g38000_col_a_m1	At4g38000	Switchgrass	1629	1656	-	12.5303	1.79e-05	0.0145	CCTTTTCTTTTTCTCCTTCCTCATTTCT
1507	C2C2dof_tnt.OBP3_col_a_m1	OBP3	Switchgrass	1592	1612	-	12.7576	1.81e-05	0.0211	TTTCTTTTTTTTTCCTCTTCT
1508	ABI3VP1_tnt.VRN1_col_a_m1	VRN1	Switchgrass	3767	3795	+	-10.1045	1.82e-05	0.00706	TGGTTGTTTCAGTCATTTTTTTTTTTTGC
1509	C2H2_tnt.TF3A_col_a_m1	TF3A	Switchgrass	473	491	-	11.816	1.84e-05	0.0317	CCTCGCCTCCCTTATCCTC
1510	C2C2dof_tnt.OBP3_col_a_m1	OBP3	Switchgrass	3785	3805	+	12.7273	1.84e-05	0.0211	TTTTTTTTTGCTTTATTTATT
1511	BBRBPC_tnt.BPC1_col_a_m1	BPC1	Switchgrass	1591	1614	+	3.34848	1.86e-05	0.0163	AAGAAGAGGAAAAAAAAAGAAAAG
1512	BBRBPC_tnt.BPC5_col_a_m1	BPC5	Switchgrass	1603	1632	+	-39.1447	1.86e-05	0.025	AAAAAAGAAAAGAGAGAAGAGGAAGAAGAA
1513	BBRBPC_tnt.BPC1_col_a_m1	BPC1	Switchgrass	3141	3164	+	3.30303	1.88e-05	0.0163	GAGACAGACAGACAGACAGACACA
1514	BBRBPC_tnt.BPC1_colamp_a_m1	BPC1	Switchgrass	617	631	+	9.83333	1.89e-05	0.0338	TCTCCTCTCTCTCTG
1515	BBRBPC_tnt.BPC5_colamp_a_m1	BPC5	Switchgrass	550	578	+	1.13415	1.91e-05	0.017	AGCGCCGCGTGCGGGAGGACGAGGGGGAC
1516	BBRBPC_tnt.BPC5_colamp_a_m1	BPC5	Switchgrass	1620	1648	+	1.07317	1.94e-05	0.0171	AGAGGAAGAAGAAATGAGGAAGGAGAAAA
1517	BBRBPC_tnt.BPC5_col_a_m1	BPC5	Switchgrass	1410	1439	+	-39.5	1.96e-05	0.0258	AGAGTGCGGAATAGATAAACTCTTAGAGAG
1518	BBRBPC_tnt.BPC1_colamp_a_m1	BPC1	Switchgrass	1119	1133	-	9.69697	1.99e-05	0.0338	CCCTCCCTCTTTTTT
1519	BBRBPC_tnt.BPC1_colamp_a_m1	BPC1	Switchgrass	1125	1139	-	9.69697	1.99e-05	0.0338	CTCCCTCCCTCCCTC
1520	ABI3VP1_tnt.VRN1_col_a_m1	VRN1	Switchgrass	4503	4531	-	-10.5075	1.99e-05	0.00747	CAAGTTTTGTTCTTTCGTTTGTTTTCTTG
1521	REM_tnt.REM19_colamp_a_m1	REM19	Switchgrass	777	797	-	10.7164	2.02e-05	0.0116	AATAAAAAATAAAAAAATAAA
1522	BBRBPC_tnt.BPC5_colamp_a_m1	BPC5	Switchgrass	1616	1644	+	0.878049	2.05e-05	0.0176	GAGAAGAGGAAGAAGAAATGAGGAAGGAG
1523	ABI3VP1_tnt.VRN1_col_a_m1	VRN1	Switchgrass	4499	4527	-	-10.6716	2.06e-05	0.00769	TTTTGTTCTTTCGTTTGTTTTCTTGCTAT
1524	BBRBPC_tnt.BPC1_col_a_m1	BPC1	Switchgrass	610	633	-	3.0303	2.06e-05	0.0169	AGCAGAGAGAGAGGAGAGGAGGAC
1525	BBRBPC_tnt.BPC5_colamp_a_m1	BPC5	Switchgrass	3888	3916	-	0.829268	2.08e-05	0.0176	AAGAGTGCCAGCAGGTGAAAGAGAAATGG
1526	ND_tnt.FRS9_col_a_m1	FRS9	Switchgrass	3886	3906	+	6.78788	2.09e-05	0.023	ATCCATTTCTCTTTCACCTGC
1527	BBRBPC_tnt.BPC5_col_a_m1	BPC5	Switchgrass	1408	1437	+	-39.9868	2.11e-05	0.0263	AGAGAGTGCGGAATAGATAAACTCTTAGAG
1528	BBRBPC_tnt.BPC5_col_a_m1	BPC5	Switchgrass	2376	2405	-	-39.9868	2.11e-05	0.0263	GATGATGATGACCTAGAGGGAGAGGGAGAG
1529	ABI3VP1_tnt.VRN1_col_a_m1	VRN1	Switchgrass	4495	4523	-	-10.9552	2.19e-05	0.00807	GTTCTTTCGTTTGTTTTCTTGCTATTTGA
1530	BBRBPC_tnt.BPC5_col_a_m1	BPC5	Switchgrass	2358	2387	-	-40.2632	2.21e-05	0.0263	GGAGAGGGAGAGAGGGTACCAGCCATACCT
1531	BBRBPC_tnt.BPC1_col_a_m1	BPC1	Switchgrass	612	635	-	2.81818	2.21e-05	0.0175	AAAGCAGAGAGAGAGGAGAGGAGG
1532	ND_tnt.FRS9_col_a_m1	FRS9	Switchgrass	1608	1628	-	6.60606	2.23e-05	0.0237	TCTTCCTCTTCTCTCTTTTCT
1533	C2H2_tnt.TF3A_col_a_m1	TF3A	Switchgrass	1632	1650	-	11.448	2.26e-05	0.0346	CTTTTTCTCCTTCCTCATT
1534	ABI3VP1_tnt.VRN1_colamp_a_m1	VRN1	Switchgrass	788	806	+	9.44444	2.27e-05	0.0201	ATTTTTTATTTTTGTTTTT
1535	ABI3VP1_tnt.VRN1_colamp_a_m1	VRN1	Switchgrass	1598	1616	-	9.44444	2.27e-05	0.0201	CTCTTTTCTTTTTTTTTCC
1536	C2C2dof_tnt.At4g38000_col_a_m1	At4g38000	Switchgrass	761	788	+	12.1212	2.28e-05	0.0161	TTTCATCAGCGGTTTTTTTATTTTTTTA
1537	BBRBPC_tnt.BPC1_colamp_a_m1	BPC1	Switchgrass	2372	2386	+	9.36364	2.29e-05	0.0345	CCCTCTCTCCCTCTC
1538	C2C2dof_tnt.OBP3_col_a_m1	OBP3	Switchgrass	1599	1619	-	12.3788	2.3e-05	0.024	TCTCTCTTTTCTTTTTTTTTC
1539	C2C2dof_tnt.OBP3_col_a_m1	OBP3	Switchgrass	1602	1622	-	12.3788	2.3e-05	0.024	TCTTCTCTCTTTTCTTTTTTT
1540	BBRBPC_tnt.BPC5_col_a_m1	BPC5	Switchgrass	1641	1670	+	-40.5921	2.33e-05	0.0268	GGAGAAAAAGAAAAGGAGGGAGCGAGGATG
1541	ABI3VP1_tnt.VRN1_col_a_m1	VRN1	Switchgrass	785	813	+	-11.2687	2.34e-05	0.00837	TTTATTTTTTATTTTTGTTTTTTACAAAA
1542	C2C2dof_tnt.At4g38000_col_a_m1	At4g38000	Switchgrass	783	810	+	12.0758	2.34e-05	0.0161	TTTTTATTTTTTATTTTTGTTTTTTACA
1543	C2C2dof_tnt.At4g38000_col_a_m1	At4g38000	Switchgrass	3784	3811	+	12.0455	2.38e-05	0.0161	TTTTTTTTTTGCTTTATTTATTTTCTTG
1544	BBRBPC_tnt.BPC1_colamp_a_m1	BPC1	Switchgrass	1644	1658	-	9.16667	2.45e-05	0.0353	CTCCTTTTCTTTTTC
1545	C2C2dof_tnt.OBP3_col_a_m1	OBP3	Switchgrass	776	796	+	12.2727	2.45e-05	0.0241	TTTTATTTTTTTATTTTTTAT
1546	C2C2dof_tnt.At4g38000_col_a_m1	At4g38000	Switchgrass	2996	3023	-	11.9848	2.47e-05	0.0165	CTAAACTTTCTTCAGATTTATTTTTTTA
1547	C2C2dof_tnt.OBP3_col_a_m1	OBP3	Switchgrass	1607	1627	-	12.2424	2.5e-05	0.0241	CTTCCTCTTCTCTCTTTTCTT
1548	C2C2dof_tnt.At4g38000_col_a_m1	At4g38000	Switchgrass	919	946	-	11.9545	2.51e-05	0.0166	CTGTCTGCAATTTTTTGTCGTCTTTTTT
1549	ABI3VP1_tnt.VRN1_col_a_m1	VRN1	Switchgrass	2995	3023	-	-11.6269	2.52e-05	0.00882	CTAAACTTTCTTCAGATTTATTTTTTTAG
1550	C2C2dof_tnt.AT5G66940_col_a_m1	AT5G66940	Switchgrass	774	802	+	12.0909	2.54e-05	0.04	TTTTTTATTTTTTTATTTTTTATTTTTGT
1551	BBRBPC_tnt.BPC5_colamp_a_m1	BPC5	Switchgrass	1606	1634	+	0.0731707	2.57e-05	0.0201	AAAGAAAAGAGAGAAGAGGAAGAAGAAAT
1552	C2C2dof_tnt.OBP3_col_a_m1	OBP3	Switchgrass	2509	2529	+	12.1818	2.59e-05	0.0245	TTGTCTTTTCTTAATTTGTTC
1553	C2C2dof_tnt.AT5G66940_col_a_m1	AT5G66940	Switchgrass	1113	1141	-	12.0455	2.61e-05	0.04	CTCTCCCTCCCTCCCTCTTTTTTCTTAGT
1554	C2H2_tnt.TF3A_col_a_m1	TF3A	Switchgrass	1641	1659	-	11.16	2.65e-05	0.038	CCTCCTTTTCTTTTTCTCC
1555	C2C2dof_tnt.AT1G69570_col_a_m1	AT1G69570	Switchgrass	4500	4526	-	11.803	2.66e-05	0.0434	TTTGTTCTTTCGTTTGTTTTCTTGCTA
1556	C2C2dof_tnt.At4g38000_col_a_m1	At4g38000	Switchgrass	1597	1624	-	11.8182	2.72e-05	0.017	CCTCTTCTCTCTTTTCTTTTTTTTTCCT
1557	ABI3VP1_tnt.VRN1_col_a_m1	VRN1	Switchgrass	1601	1629	-	-12	2.72e-05	0.00918	TTCTTCCTCTTCTCTCTTTTCTTTTTTTT
1558	C2C2dof_tnt.AT1G69570_col_a_m1	AT1G69570	Switchgrass	2925	2951	-	11.7576	2.73e-05	0.0434	ACTGAACTTTTTTCAGATTTTTTTAGA
1559	BBRBPC_tnt.BPC5_colamp_a_m1	BPC5	Switchgrass	2180	2208	+	-0.170732	2.75e-05	0.0202	TAGACACTAAGAGAGAAGGGAAAGAAGAA
1560	C2H2_tnt.TF3A_col_a_m1	TF3A	Switchgrass	461	479	-	11.088	2.75e-05	0.038	TATCCTCTTCCTCATTTCC
1561	ABI3VP1_tnt.VRN1_col_a_m1	VRN1	Switchgrass	763	791	+	-12.0597	2.76e-05	0.0092	TCATCAGCGGTTTTTTTATTTTTTTATTT
1562	ABI3VP1_tnt.VRN1_col_a_m1	VRN1	Switchgrass	1594	1622	-	-12.0597	2.76e-05	0.0092	TCTTCTCTCTTTTCTTTTTTTTTCCTCTT
1563	BBRBPC_tnt.BPC5_colamp_a_m1	BPC5	Switchgrass	1580	1608	+	-0.195122	2.76e-05	0.0202	TGACATGAATCAAGAAGAGGAAAAAAAAA
1564	C2C2dof_tnt.At4g38000_col_a_m1	At4g38000	Switchgrass	2997	3024	-	11.7879	2.77e-05	0.017	ACTAAACTTTCTTCAGATTTATTTTTTT
1565	BBRBPC_tnt.BPC1_col_a_m1	BPC1	Switchgrass	1113	1136	+	2.12121	2.77e-05	0.0206	ACTAAGAAAAAAGAGGGAGGGAGG
1566	BBRBPC_tnt.BPC1_col_a_m1	BPC1	Switchgrass	1622	1645	+	2.06061	2.82e-05	0.0208	AGGAAGAAGAAATGAGGAAGGAGA
1567	C2C2dof_tnt.AT1G69570_col_a_m1	AT1G69570	Switchgrass	783	809	+	11.6818	2.85e-05	0.0434	TTTTTATTTTTTATTTTTGTTTTTTAC
1568	C2C2dof_tnt.OBP3_col_a_m1	OBP3	Switchgrass	769	789	+	12	2.9e-05	0.0264	GCGGTTTTTTTATTTTTTTAT
1569	ABI3VP1_tnt.VRN1_col_a_m1	VRN1	Switchgrass	4505	4533	-	-12.3134	2.91e-05	0.00932	CACAAGTTTTGTTCTTTCGTTTGTTTTCT
1570	C2C2dof_tnt.At4g38000_col_a_m1	At4g38000	Switchgrass	1605	1632	-	11.697	2.92e-05	0.0171	TTCTTCTTCCTCTTCTCTCTTTTCTTTT
1571	C2C2dof_tnt.At4g38000_col_a_m1	At4g38000	Switchgrass	1240	1267	+	11.6667	2.97e-05	0.0172	CAATTATTTTTGTTATAATTATTTTTGT
1572	C2H2_tnt.TF3A_col_a_m1	TF3A	Switchgrass	558	576	-	10.944	2.98e-05	0.0389	CCCCCTCGTCCTCCCGCAC
1573	REM_tnt.REM19_colamp_a_m1	REM19	Switchgrass	3796	3816	-	9.79104	3.03e-05	0.0151	TTTTGCAAGAAAATAAATAAA
1574	ABI3VP1_tnt.VRN1_colamp_a_m1	VRN1	Switchgrass	4082	4100	+	8.56944	3.06e-05	0.0226	GAGATTTTTGTTTTTAGAT
1575	REM_tnt.REM19_col_a_m1	REM19	Switchgrass	141	155	-	11.597	3.08e-05	0.0237	TTAAAAAAAATAAAA
1576	C2H2_tnt.TF3A_col_a_m1	TF3A	Switchgrass	1615	1633	-	10.872	3.09e-05	0.0389	TTTCTTCTTCCTCTTCTCT
1577	BBRBPC_tnt.BPC1_col_a_m1	BPC1	Switchgrass	1634	1657	+	1.71212	3.16e-05	0.0228	TGAGGAAGGAGAAAAAGAAAAGGA
1578	ABI3VP1_tnt.VRN1_colamp_a_m1	VRN1	Switchgrass	3783	3801	+	8.44444	3.19e-05	0.0226	TTTTTTTTTTTGCTTTATT
1579	ND_tnt.FRS9_col_a_m1	FRS9	Switchgrass	1610	1630	-	5.57576	3.19e-05	0.0304	CTTCTTCCTCTTCTCTCTTTT
1580	BBRBPC_tnt.BPC5_colamp_a_m1	BPC5	Switchgrass	1644	1672	+	-0.743902	3.21e-05	0.0226	GAAAAAGAAAAGGAGGGAGCGAGGATGAT
1581	C2H2_tnt.TF3A_col_a_m1	TF3A	Switchgrass	1621	1639	-	10.8	3.22e-05	0.0389	TCCTCATTTCTTCTTCCTC
1582	BBRBPC_tnt.BPC1_col_a_m1	BPC1	Switchgrass	614	637	-	1.63636	3.23e-05	0.023	AGAAAGCAGAGAGAGAGGAGAGGA
1583	BBRBPC_tnt.BPC5_colamp_a_m1	BPC5	Switchgrass	1632	1660	+	-0.780488	3.24e-05	0.0226	AATGAGGAAGGAGAAAAAGAAAAGGAGGG
1584	BBRBPC_tnt.BPC5_col_a_m1	BPC5	Switchgrass	1623	1652	+	-42.5395	3.3e-05	0.0356	GGAAGAAGAAATGAGGAAGGAGAAAAAGAA
1585	C2H2_tnt.TF3A_col_a_m1	TF3A	Switchgrass	258	276	-	10.696	3.4e-05	0.0389	CCTCCCCGTCCTCCGCGGC
1586	C2C2dof_tnt.OBP3_col_a_m1	OBP3	Switchgrass	2187	2207	-	11.7273	3.42e-05	0.0298	TCTTCTTTCCCTTCTCTCTTA
1587	REM_tnt.REM19_col_a_m1	REM19	Switchgrass	139	153	-	11.3582	3.48e-05	0.0252	AAAAAAAATAAAACT
1588	BBRBPC_tnt.BPC5_col_a_m1	BPC5	Switchgrass	1600	1629	+	-42.8421	3.48e-05	0.0356	AAAAAAAAAGAAAAGAGAGAAGAGGAAGAA
1589	BBRBPC_tnt.BPC5_colamp_a_m1	BPC5	Switchgrass	1109	1137	+	-1.08537	3.52e-05	0.024	AGAAACTAAGAAAAAAGAGGGAGGGAGGG
1590	C2C2dof_tnt.At4g38000_col_a_m1	At4g38000	Switchgrass	1617	1644	-	11.3636	3.52e-05	0.0201	CTCCTTCCTCATTTCTTCTTCCTCTTCT
1591	BBRBPC_tnt.BPC1_col_a_m1	BPC1	Switchgrass	1610	1633	+	1.36364	3.53e-05	0.024	AAAAGAGAGAAGAGGAAGAAGAAA
1592	BBRBPC_tnt.BPC5_col_a_m1	BPC5	Switchgrass	3128	3157	+	-42.9211	3.53e-05	0.0356	GCTCAATTTGATAGAGACAGACAGACAGAC
1593	REM_tnt.REM19_col_a_m1	REM19	Switchgrass	786	800	-	11.3134	3.56e-05	0.0253	AAAAATAAAAAATAA
1594	REM_tnt.REM19_col_a_m1	REM19	Switchgrass	3777	3791	-	11.3134	3.56e-05	0.0253	AAAAAAAAAATGACT
1595	ABI3VP1_tnt.VRN1_colamp_a_m1	VRN1	Switchgrass	787	805	+	8.02778	3.65e-05	0.0239	TATTTTTTATTTTTGTTTT
1596	C2C2dof_tnt.AT5G66940_col_a_m1	AT5G66940	Switchgrass	786	814	+	11.4545	3.66e-05	0.0442	TTATTTTTTATTTTTGTTTTTTACAAAAA
1597	BBRBPC_tnt.BPC1_colamp_a_m1	BPC1	Switchgrass	621	635	+	8.09091	3.68e-05	0.044	CTCTCTCTCTGCTTT
1598	C2C2dof_tnt.OBP3_col_a_m1	OBP3	Switchgrass	1597	1617	-	11.5909	3.7e-05	0.0314	TCTCTTTTCTTTTTTTTTCCT
1599	REM_tnt.REM19_colamp_a_m1	REM19	Switchgrass	3785	3805	-	9.29851	3.73e-05	0.0178	AATAAATAAAGCAAAAAAAAA
1600	C2C2dof_tnt.At4g38000_col_a_m1	At4g38000	Switchgrass	1624	1651	-	11.2576	3.74e-05	0.0211	TCTTTTTCTCCTTCCTCATTTCTTCTTC
1601	C2H2_tnt.TF3A_col_a_m1	TF3A	Switchgrass	3600	3618	-	10.512	3.75e-05	0.0389	CTTCACCTTGATCATCCAC
1602	REM_tnt.REM19_colamp_a_m1	REM19	Switchgrass	912	932	+	9.28358	3.76e-05	0.0178	ATTCGAAAAAAAAGACGACAA
1603	BBRBPC_tnt.BPC1_col_a_m1	BPC1	Switchgrass	2377	2400	-	1.06061	3.88e-05	0.0261	TGATGACCTAGAGGGAGAGGGAGA
1604	ABI3VP1_tnt.VRN1_colamp_a_m1	VRN1	Switchgrass	785	803	+	7.80556	3.92e-05	0.0248	TTTATTTTTTATTTTTGTT
1605	C2H2_tnt.TF3A_col_a_m1	TF3A	Switchgrass	526	544	-	10.408	3.97e-05	0.0395	GCTCCTCCGCCGCTGCCTC
1606	BBRBPC_tnt.BPC5_colamp_a_m1	BPC5	Switchgrass	483	511	+	-1.56098	4e-05	0.0257	GAGGCGAGGAGCACGGGACGGGGCGAGAG
1607	BBRBPC_tnt.BPC5_colamp_a_m1	BPC5	Switchgrass	774	802	-	-1.57317	4.01e-05	0.0257	ACAAAAATAAAAAATAAAAAAATAAAAAA
1608	REM_tnt.REM19_colamp_a_m1	REM19	Switchgrass	1599	1619	+	9.1194	4.03e-05	0.0186	GAAAAAAAAAGAAAAGAGAGA
1609	C2C2dof_tnt.AT5G66940_col_a_m1	AT5G66940	Switchgrass	1643	1671	-	11.2727	4.06e-05	0.0454	TCATCCTCGCTCCCTCCTTTTCTTTTTCT
1610	BBRBPC_tnt.BPC1_colamp_a_m1	BPC1	Switchgrass	1133	1147	-	7.80303	4.08e-05	0.047	TCGCCTCTCTCCCTC
1611	ABI3VP1_tnt.VRN1_colamp_a_m1	VRN1	Switchgrass	3779	3797	+	7.66667	4.1e-05	0.0257	TCATTTTTTTTTTTTGCTT
1612	BBRBPC_tnt.BPC1_colamp_a_m1	BPC1	Switchgrass	1612	1626	-	7.78788	4.11e-05	0.047	TTCCTCTTCTCTCTT
1613	ND_tnt.FRS9_col_a_m1	FRS9	Switchgrass	1642	1662	-	4.80303	4.14e-05	0.0368	CTCCCTCCTTTTCTTTTTCTC
1614	ABI3VP1_tnt.VRN1_col_a_m1	VRN1	Switchgrass	1590	1618	-	-14.0448	4.14e-05	0.0119	CTCTCTTTTCTTTTTTTTTCCTCTTCTTG
1615	C2C2dof_tnt.At4g38000_col_a_m1	At4g38000	Switchgrass	1589	1616	-	11.0606	4.17e-05	0.0222	CTCTTTTCTTTTTTTTTCCTCTTCTTGA
1616	C2C2dof_tnt.At4g38000_col_a_m1	At4g38000	Switchgrass	1604	1631	-	11.0606	4.17e-05	0.0222	TCTTCTTCCTCTTCTCTCTTTTCTTTTT
1617	C2C2dof_tnt.AT5G66940_col_a_m1	AT5G66940	Switchgrass	1630	1658	-	11.2121	4.2e-05	0.0454	CTCCTTTTCTTTTTCTCCTTCCTCATTTC
1618	C2C2dof_tnt.At4g38000_col_a_m1	At4g38000	Switchgrass	1591	1618	-	11.0455	4.2e-05	0.0222	CTCTCTTTTCTTTTTTTTTCCTCTTCTT
1619	ABI3VP1_tnt.VRN1_colamp_a_m1	VRN1	Switchgrass	789	807	+	7.58333	4.21e-05	0.0261	TTTTTTATTTTTGTTTTTT
1620	BBRBPC_tnt.BPC1_col_a_m1	BPC1	Switchgrass	497	520	+	0.787879	4.22e-05	0.0275	GGGACGGGGCGAGAGGCAGAGCTC
1621	C2H2_tnt.TF3A_col_a_m1	TF3A	Switchgrass	2396	2414	+	10.264	4.28e-05	0.0396	CATCATCATCATCATCTAT
1622	C2H2_tnt.TF3A_col_a_m1	TF3A	Switchgrass	1638	1656	-	10.256	4.3e-05	0.0396	CCTTTTCTTTTTCTCCTTC
1623	ABI3VP1_tnt.VRN1_colamp_a_m1	VRN1	Switchgrass	776	794	+	7.43056	4.42e-05	0.0266	TTTTATTTTTTTATTTTTT
1624	REM_tnt.REM19_col_a_m1	REM19	Switchgrass	774	788	-	10.8358	4.49e-05	0.0283	TAAAAAAATAAAAAA
1625	ABI3VP1_tnt.VRN1_colamp_a_m1	VRN1	Switchgrass	777	795	+	7.36111	4.52e-05	0.0267	TTTATTTTTTTATTTTTTA
1626	ABI3VP1_tnt.VRN1_colamp_a_m1	VRN1	Switchgrass	784	802	+	7.36111	4.52e-05	0.0267	TTTTATTTTTTATTTTTGT
1627	ABI3VP1_tnt.VRN1_col_a_m1	VRN1	Switchgrass	1242	1270	+	-14.4776	4.52e-05	0.0126	ATTATTTTTGTTATAATTATTTTTGTTGA
1628	ABI3VP1_tnt.VRN1_col_a_m1	VRN1	Switchgrass	3772	3800	+	-14.4776	4.52e-05	0.0126	GTTTCAGTCATTTTTTTTTTTTGCTTTAT
1629	C2C2dof_tnt.At4g38000_col_a_m1	At4g38000	Switchgrass	1609	1636	-	10.9091	4.53e-05	0.0233	TCATTTCTTCTTCCTCTTCTCTCTTTTC
1630	BBRBPC_tnt.BPC5_colamp_a_m1	BPC5	Switchgrass	1119	1147	+	-2.04878	4.55e-05	0.0276	AAAAAAGAGGGAGGGAGGGAGAGAGGCGA
1631	BBRBPC_tnt.BPC5_colamp_a_m1	BPC5	Switchgrass	3894	3922	-	-2.06098	4.56e-05	0.0276	TAGCTTAAGAGTGCCAGCAGGTGAAAGAG
1632	BBRBPC_tnt.BPC5_colamp_a_m1	BPC5	Switchgrass	1103	1131	+	-2.07317	4.58e-05	0.0276	AATTCTAGAAACTAAGAAAAAAGAGGGAG
1633	C2H2_tnt.TF3A_col_a_m1	TF3A	Switchgrass	564	582	-	10.112	4.64e-05	0.0399	CTTGGTCCCCCTCGTCCTC
1634	BBRBPC_tnt.BPC5_col_a_m1	BPC5	Switchgrass	1110	1139	+	-44.5658	4.66e-05	0.0395	GAAACTAAGAAAAAAGAGGGAGGGAGGGAG
1635	BBRBPC_tnt.BPC5_colamp_a_m1	BPC5	Switchgrass	3781	3809	-	-2.18293	4.71e-05	0.0279	AGAAAATAAATAAAGCAAAAAAAAAAAAT
1636	BBRBPC_tnt.BPC5_colamp_a_m1	BPC5	Switchgrass	459	487	+	-2.21951	4.76e-05	0.0279	GGGGAAATGAGGAAGAGGATAAGGGAGGC
1637	BBRBPC_tnt.BPC5_colamp_a_m1	BPC5	Switchgrass	2372	2400	-	-2.2561	4.8e-05	0.0279	TGATGACCTAGAGGGAGAGGGAGAGAGGG
1638	REM_tnt.REM19_colamp_a_m1	REM19	Switchgrass	1589	1609	+	8.64179	4.91e-05	0.0209	TCAAGAAGAGGAAAAAAAAAG
1639	BBRBPC_tnt.BPC5_colamp_a_m1	BPC5	Switchgrass	1610	1638	+	-2.37805	4.96e-05	0.0283	AAAAGAGAGAAGAGGAAGAAGAAATGAGG
1640	ND_tnt.FRS9_col_a_m1	FRS9	Switchgrass	2364	2384	+	4.25758	4.96e-05	0.0407	GGCTGGTACCCTCTCTCCCTC
1641	ND_tnt.FRS9_col_a_m1	FRS9	Switchgrass	1131	1151	-	4.24242	4.98e-05	0.0407	GGCTTCGCCTCTCTCCCTCCC
1642	C2C2dof_tnt.OBP3_col_a_m1	OBP3	Switchgrass	3781	3801	+	11.0758	4.99e-05	0.0365	ATTTTTTTTTTTTGCTTTATT
1643	BBRBPC_tnt.BPC1_col_a_m1	BPC1	Switchgrass	608	631	-	0.227273	5.02e-05	0.0315	CAGAGAGAGAGGAGAGGAGGACCC
1644	ND_tnt.FRS9_col_a_m1	FRS9	Switchgrass	1632	1652	-	4.21212	5.03e-05	0.0407	TTCTTTTTCTCCTTCCTCATT
1645	C2H2_tnt.TF3A_col_a_m1	TF3A	Switchgrass	243	261	-	9.944	5.07e-05	0.0424	CGGCTCTCCCCTTCTCCTC
1646	BBRBPC_tnt.BPC5_col_a_m1	BPC5	Switchgrass	1629	1658	+	-45.1974	5.12e-05	0.0423	AGAAATGAGGAAGGAGAAAAAGAAAAGGAG
1647	ABI3VP1_tnt.VRN1_col_a_m1	VRN1	Switchgrass	917	945	-	-15.1343	5.15e-05	0.0138	TGTCTGCAATTTTTTGTCGTCTTTTTTTT
1648	C2C2dof_tnt.OBP3_col_a_m1	OBP3	Switchgrass	920	940	-	11	5.21e-05	0.0377	GCAATTTTTTGTCGTCTTTTT
1649	BBRBPC_tnt.BPC5_col_a_m1	BPC5	Switchgrass	3144	3173	+	-45.3553	5.24e-05	0.0427	ACAGACAGACAGACAGACACAATTATTTAG
1650	ABI3VP1_tnt.VRN1_colamp_a_m1	VRN1	Switchgrass	792	810	+	6.86111	5.28e-05	0.0288	TTTATTTTTGTTTTTTACA
1651	ABI3VP1_tnt.VRN1_colamp_a_m1	VRN1	Switchgrass	772	790	+	6.79167	5.4e-05	0.0292	GTTTTTTTATTTTTTTATT
1652	BBRBPC_tnt.BPC1_col_a_m1	BPC1	Switchgrass	1630	1653	+	-0.0151515	5.41e-05	0.0333	GAAATGAGGAAGGAGAAAAAGAAA
1653	C2C2dof_tnt.At4g38000_col_a_m1	At4g38000	Switchgrass	3767	3794	+	10.5758	5.42e-05	0.0262	TGGTTGTTTCAGTCATTTTTTTTTTTTG
1654	C2C2dof_tnt.OBP3_col_a_m1	OBP3	Switchgrass	1589	1609	-	10.9242	5.44e-05	0.0377	CTTTTTTTTTCCTCTTCTTGA
1655	REM_tnt.REM19_col_a_m1	REM19	Switchgrass	1603	1617	+	10.4179	5.44e-05	0.0315	AAAAAAGAAAAGAGA
1656	BBRBPC_tnt.BPC1_col_a_m1	BPC1	Switchgrass	3782	3805	-	-0.0757576	5.51e-05	0.0334	AATAAATAAAGCAAAAAAAAAAAA
1657	REM_tnt.REM19_col_a_m1	REM19	Switchgrass	3795	3809	-	10.3433	5.64e-05	0.0319	AGAAAATAAATAAAG
1658	BBRBPC_tnt.BPC5_colamp_a_m1	BPC5	Switchgrass	3880	3908	-	-2.87805	5.64e-05	0.0301	CAGCAGGTGAAAGAGAAATGGATCAGAAG
1659	ABI3VP1_tnt.VRN1_col_a_m1	VRN1	Switchgrass	918	946	-	-15.6567	5.71e-05	0.0148	CTGTCTGCAATTTTTTGTCGTCTTTTTTT
1660	C2H2_tnt.TF3A_col_a_m1	TF3A	Switchgrass	1624	1642	-	9.712	5.72e-05	0.0455	CCTTCCTCATTTCTTCTTC
1661	ABI3VP1_tnt.VRN1_col_a_m1	VRN1	Switchgrass	3788	3816	+	-15.6716	5.73e-05	0.0148	TTTTTTGCTTTATTTATTTTCTTGCAAAA
1662	BBRBPC_tnt.BPC5_colamp_a_m1	BPC5	Switchgrass	2364	2392	-	-2.93902	5.73e-05	0.0303	TAGAGGGAGAGGGAGAGAGGGTACCAGCC
1663	C2C2dof_tnt.At4g38000_col_a_m1	At4g38000	Switchgrass	760	787	+	10.4697	5.74e-05	0.0271	ATTTCATCAGCGGTTTTTTTATTTTTTT
1664	ABI3VP1_tnt.VRN1_colamp_a_m1	VRN1	Switchgrass	780	798	+	6.54167	5.83e-05	0.03	ATTTTTTTATTTTTTATTT
1665	C2C2dof_tnt.OBP3_col_a_m1	OBP3	Switchgrass	1640	1660	-	10.7879	5.87e-05	0.0385	CCCTCCTTTTCTTTTTCTCCT
1666	BBRBPC_tnt.BPC1_col_a_m1	BPC1	Switchgrass	1648	1671	+	-0.333333	5.96e-05	0.0343	AAGAAAAGGAGGGAGCGAGGATGA
1667	REM_tnt.REM19_colamp_a_m1	REM19	Switchgrass	1253	1273	-	8.14925	6e-05	0.0237	GTTTCAACAAAAATAATTATA
1668	ABI3VP1_tnt.VRN1_colamp_a_m1	VRN1	Switchgrass	4500	4518	-	6.43056	6.03e-05	0.0308	TTCGTTTGTTTTCTTGCTA
1669	REM_tnt.REM19_col_a_m1	REM19	Switchgrass	1640	1654	+	10.194	6.05e-05	0.0324	AGGAGAAAAAGAAAA
1670	BBRBPC_tnt.BPC5_col_a_m1	BPC5	Switchgrass	3146	3175	+	-46.3553	6.06e-05	0.0477	AGACAGACAGACAGACACAATTATTTAGAA
1671	C2C2dof_tnt.OBP3_col_a_m1	OBP3	Switchgrass	2892	2912	-	10.7121	6.12e-05	0.0388	CTTTCTTTAGATTGTTTATAT
1672	BBRBPC_tnt.BPC1_col_a_m1	BPC1	Switchgrass	1617	1640	+	-0.454545	6.18e-05	0.0345	AGAAGAGGAAGAAGAAATGAGGAA
1673	C2H2_tnt.TF3A_col_a_m1	TF3A	Switchgrass	412	430	-	9.536	6.27e-05	0.048	CCTCCGCCGCCGCCTACGC
1674	C2C2dof_tnt.OBP3_col_a_m1	OBP3	Switchgrass	1633	1653	-	10.6667	6.27e-05	0.0388	TTTCTTTTTCTCCTTCCTCAT
1675	BBRBPC_tnt.BPC5_col_a_m1	BPC5	Switchgrass	1128	1157	+	-46.5789	6.27e-05	0.0482	GGAGGGAGGGAGAGAGGCGAAGCCCTGCCG
1676	C2C2dof_tnt.At4g38000_col_a_m1	At4g38000	Switchgrass	916	943	-	10.2879	6.32e-05	0.028	TCTGCAATTTTTTGTCGTCTTTTTTTTC
1677	C2C2dof_tnt.At4g38000_col_a_m1	At4g38000	Switchgrass	3761	3788	+	10.2879	6.32e-05	0.028	TTCTATTGGTTGTTTCAGTCATTTTTTT
1678	C2C2dof_tnt.At4g38000_col_a_m1	At4g38000	Switchgrass	1607	1634	-	10.2727	6.37e-05	0.028	ATTTCTTCTTCCTCTTCTCTCTTTTCTT
1679	BBRBPC_tnt.BPC5_col_a_m1	BPC5	Switchgrass	3142	3171	+	-46.75	6.44e-05	0.0489	AGACAGACAGACAGACAGACACAATTATTT
1680	REM_tnt.REM19_col_a_m1	REM19	Switchgrass	3797	3811	-	10.0299	6.53e-05	0.0341	CAAGAAAATAAATAA
1681	BBRBPC_tnt.BPC1_col_a_m1	BPC1	Switchgrass	3139	3162	+	-0.636364	6.53e-05	0.0357	TAGAGACAGACAGACAGACAGACA
1682	ABI3VP1_tnt.VRN1_colamp_a_m1	VRN1	Switchgrass	3776	3794	+	6.05556	6.75e-05	0.0321	CAGTCATTTTTTTTTTTTG
1683	ABI3VP1_tnt.VRN1_colamp_a_m1	VRN1	Switchgrass	773	791	+	6.04167	6.78e-05	0.0321	TTTTTTTATTTTTTTATTT
1684	REM_tnt.REM19_col_a_m1	REM19	Switchgrass	140	154	-	9.92537	6.85e-05	0.0354	TAAAAAAAATAAAAC
1685	C2C2dof_tnt.OBP3_col_a_m1	OBP3	Switchgrass	792	812	+	10.4848	6.93e-05	0.0408	TTTATTTTTGTTTTTTACAAA
1686	BBRBPC_tnt.BPC5_colamp_a_m1	BPC5	Switchgrass	1588	1616	+	-3.71951	7e-05	0.0336	ATCAAGAAGAGGAAAAAAAAAGAAAAGAG
1687	C2C2dof_tnt.OBP3_col_a_m1	OBP3	Switchgrass	142	162	+	10.4242	7.16e-05	0.0414	TTTATTTTTTTTAAATCTTAT
1688	ABI3VP1_tnt.VRN1_col_a_m1	VRN1	Switchgrass	1605	1633	-	-16.8209	7.17e-05	0.017	TTTCTTCTTCCTCTTCTCTCTTTTCTTTT
1689	BBRBPC_tnt.BPC1_col_a_m1	BPC1	Switchgrass	2375	2398	-	-0.954545	7.19e-05	0.0373	ATGACCTAGAGGGAGAGGGAGAGA
1690	ABI3VP1_tnt.VRN1_col_a_m1	VRN1	Switchgrass	1596	1624	-	-16.8358	7.19e-05	0.017	CCTCTTCTCTCTTTTCTTTTTTTTTCCTC
1691	C2C2dof_tnt.OBP3_col_a_m1	OBP3	Switchgrass	1594	1614	-	10.3788	7.34e-05	0.042	CTTTTCTTTTTTTTTCCTCTT
1692	ABI3VP1_tnt.VRN1_colamp_a_m1	VRN1	Switchgrass	770	788	+	5.72222	7.46e-05	0.0342	CGGTTTTTTTATTTTTTTA
1693	REM_tnt.REM19_colamp_a_m1	REM19	Switchgrass	1593	1613	+	7.59701	7.49e-05	0.0272	GAAGAGGAAAAAAAAAGAAAA
1694	C2C2dof_tnt.OBP3_col_a_m1	OBP3	Switchgrass	143	163	+	10.2879	7.71e-05	0.0434	TTATTTTTTTTAAATCTTATT
1695	BBRBPC_tnt.BPC5_colamp_a_m1	BPC5	Switchgrass	1605	1633	+	-4.14634	7.8e-05	0.0366	AAAAGAAAAGAGAGAAGAGGAAGAAGAAA
1696	ABI3VP1_tnt.VRN1_col_a_m1	VRN1	Switchgrass	4072	4100	+	-17.3134	7.88e-05	0.018	TCTTCGGAGTGAGATTTTTGTTTTTAGAT
1697	BBRBPC_tnt.BPC5_colamp_a_m1	BPC5	Switchgrass	230	258	+	-4.23171	7.97e-05	0.0371	GCACGAGGGCTGAGAGGAGAAGGGGAGAG
1698	BBRBPC_tnt.BPC1_col_a_m1	BPC1	Switchgrass	2190	2213	+	-1.30303	7.97e-05	0.0394	GAGAGAAGGGAAAGAAGAAGTTGA
1699	BBRBPC_tnt.BPC5_colamp_a_m1	BPC5	Switchgrass	613	641	-	-4.2561	8.02e-05	0.0371	CAGTAGAAAGCAGAGAGAGAGGAGAGGAG
1700	C2C2dof_tnt.At4g38000_col_a_m1	At4g38000	Switchgrass	1623	1650	-	9.81818	8.06e-05	0.0327	CTTTTTCTCCTTCCTCATTTCTTCTTCC
1701	REM_tnt.REM19_colamp_a_m1	REM19	Switchgrass	913	933	+	7.38806	8.13e-05	0.0281	TTCGAAAAAAAAGACGACAAA
1702	BBRBPC_tnt.BPC1_col_a_m1	BPC1	Switchgrass	1599	1622	+	-1.37879	8.15e-05	0.0394	GAAAAAAAAAGAAAAGAGAGAAGA
1703	ABI3VP1_tnt.VRN1_col_a_m1	VRN1	Switchgrass	1245	1273	+	-17.5373	8.22e-05	0.0185	ATTTTTGTTATAATTATTTTTGTTGAAAC
1704	C2C2dof_tnt.At4g38000_col_a_m1	At4g38000	Switchgrass	776	803	+	9.77273	8.25e-05	0.0331	TTTTATTTTTTTATTTTTTATTTTTGTT
1705	C2C2dof_tnt.OBP3_col_a_m1	OBP3	Switchgrass	1111	1131	-	10.1515	8.29e-05	0.0459	CTCCCTCTTTTTTCTTAGTTT
1706	C2C2dof_tnt.At4g38000_col_a_m1	At4g38000	Switchgrass	3766	3793	+	9.71212	8.51e-05	0.0333	TTGGTTGTTTCAGTCATTTTTTTTTTTT
1707	ABI3VP1_tnt.VRN1_col_a_m1	VRN1	Switchgrass	130	158	+	-17.7463	8.56e-05	0.0188	CTCTCAGAAAGTTTTATTTTTTTTAAATC
1708	BBRBPC_tnt.BPC1_col_a_m1	BPC1	Switchgrass	457	480	+	-1.62121	8.76e-05	0.0408	GTGGGGAAATGAGGAAGAGGATAA
1709	BBRBPC_tnt.BPC1_col_a_m1	BPC1	Switchgrass	1604	1627	+	-1.65152	8.83e-05	0.0408	AAAAAGAAAAGAGAGAAGAGGAAG
1710	C2C2dof_tnt.At4g38000_col_a_m1	At4g38000	Switchgrass	1626	1653	-	9.63636	8.85e-05	0.0342	TTTCTTTTTCTCCTTCCTCATTTCTTCT
1711	ABI3VP1_tnt.VRN1_colamp_a_m1	VRN1	Switchgrass	779	797	+	5.11111	8.91e-05	0.0393	TATTTTTTTATTTTTTATT
1712	BBRBPC_tnt.BPC1_col_a_m1	BPC1	Switchgrass	1606	1629	+	-1.71212	8.99e-05	0.0413	AAAGAAAAGAGAGAAGAGGAAGAA
1713	BBRBPC_tnt.BPC5_colamp_a_m1	BPC5	Switchgrass	416	444	+	-4.71951	9e-05	0.0398	AGGCGGCGGCGGAGGAGGAGGAGGAGGAG
1714	ABI3VP1_tnt.VRN1_colamp_a_m1	VRN1	Switchgrass	4497	4515	-	5.06944	9.02e-05	0.0393	GTTTGTTTTCTTGCTATTT
1715	BBRBPC_tnt.BPC5_colamp_a_m1	BPC5	Switchgrass	1593	1621	+	-4.7439	9.05e-05	0.0398	GAAGAGGAAAAAAAAAGAAAAGAGAGAAG
1716	REM_tnt.REM19_colamp_a_m1	REM19	Switchgrass	784	804	-	7.07463	9.19e-05	0.0297	AAACAAAAATAAAAAATAAAA
1717	C2C2dof_tnt.At4g38000_col_a_m1	At4g38000	Switchgrass	3765	3792	+	9.56061	9.19e-05	0.035	ATTGGTTGTTTCAGTCATTTTTTTTTTT
1718	BBRBPC_tnt.BPC1_col_a_m1	BPC1	Switchgrass	1598	1621	+	-1.78788	9.19e-05	0.0419	GGAAAAAAAAAGAAAAGAGAGAAG
1719	BBRBPC_tnt.BPC5_colamp_a_m1	BPC5	Switchgrass	2328	2356	-	-4.84146	9.27e-05	0.0405	TGGAGAAGAATCTGGAGATGGAGTAGGAC
1720	C2C2dof_tnt.At4g38000_col_a_m1	At4g38000	Switchgrass	3764	3791	+	9.51515	9.41e-05	0.035	TATTGGTTGTTTCAGTCATTTTTTTTTT
1721	ABI3VP1_tnt.VRN1_colamp_a_m1	VRN1	Switchgrass	781	799	+	4.88889	9.5e-05	0.0399	TTTTTTTATTTTTTATTTT
1722	ABI3VP1_tnt.VRN1_colamp_a_m1	VRN1	Switchgrass	774	792	+	4.875	9.54e-05	0.0399	TTTTTTATTTTTTTATTTT
1723	BBRBPC_tnt.BPC1_col_a_m1	BPC1	Switchgrass	1612	1635	+	-1.92424	9.57e-05	0.0427	AAGAGAGAAGAGGAAGAAGAAATG
1724	REM_tnt.REM19_col_a_m1	REM19	Switchgrass	788	802	-	9.13433	9.67e-05	0.0436	ACAAAAATAAAAAAT
1725	BBRBPC_tnt.BPC5_colamp_a_m1	BPC5	Switchgrass	1608	1636	+	-5.0122	9.67e-05	0.0417	AGAAAAGAGAGAAGAGGAAGAAGAAATGA
1726	REM_tnt.REM19_colamp_a_m1	REM19	Switchgrass	775	795	-	6.91045	9.79e-05	0.0306	TAAAAAATAAAAAAATAAAAA
1727	ABI3VP1_tnt.VRN1_colamp_a_m1	VRN1	Switchgrass	771	789	+	4.76389	9.85e-05	0.0402	GGTTTTTTTATTTTTTTAT
1728	REM_tnt.REM19_col_a_m1	REM19	Switchgrass	4503	4517	+	9.08955	9.85e-05	0.044	CAAGAAAACAAACGA
1729	BBRBPC_tnt.BPC5_colamp_a_m1	BPC5	Setaria	1609	1637	+	25.0244	1.69e-09	0.000107	AGAAAGAGATGAGAGAGAGAAAGAAAAAG
1730	BBRBPC_tnt.BPC1_colamp_a_m1	BPC1	Setaria	1619	1633	-	23.2273	1.37e-08	0.000442	TTCTTTCTCTCTCTC
1731	Trihelix_tnt.AT3G58630_col_a_m1	AT3G58630	Setaria	3195	3209	+	19.2273	3.52e-08	0.000739	CAATCTCCGGCGAGG
1732	Trihelix_tnt.AT3G58630_colamp_a_m1	AT3G58630	Setaria	3195	3209	+	18.9394	4.89e-08	0.00131	CAATCTCCGGCGAGG
1733	ND_tnt.FRS9_col_a_m1	FRS9	Setaria	1617	1637	-	20.3485	5.01e-08	0.000534	CTTTTTCTTTCTCTCTCTCAT
1734	Trihelix_tnt.AT5G05550_colamp_a_m1	AT5G05550	Setaria	3196	3210	+	18.7424	6.44e-08	0.000859	AATCTCCGGCGAGGT
1735	ABI3VP1_tnt.VRN1_colamp_a_m1	VRN1	Setaria	2356	2374	+	21.0972	6.57e-08	0.00147	GTCTTTTTTTTTTGTTCGT
1736	REM_tnt.REM19_colamp_a_m1	REM19	Setaria	2354	2374	-	20.5821	7.89e-08	0.000902	ACGAACAAAAAAAAAAGACAA
1737	REM_tnt.REM19_col_a_m1	REM19	Setaria	2357	2371	-	19.5373	9.91e-08	0.00149	AACAAAAAAAAAAGA
1738	ND_tnt.FRS9_col_a_m1	FRS9	Setaria	1619	1639	-	18.8182	1.15e-07	0.000814	AGCTTTTTCTTTCTCTCTCTC
1739	ND_tnt.FRS9_col_a_m1	FRS9	Setaria	1615	1635	-	17.5606	2.19e-07	0.00111	TTTTCTTTCTCTCTCTCATCT
1740	Trihelix_tnt.AT5G05550_col_a_m1	AT5G05550	Setaria	3196	3210	+	17.6667	2.23e-07	0.00297	AATCTCCGGCGAGGT
1741	BBRBPC_tnt.BPC1_col_a_m1	BPC1	Setaria	1617	1640	+	14.8939	2.3e-07	0.0013	ATGAGAGAGAGAAAGAAAAAGCTT
1742	REM_tnt.REM19_colamp_a_m1	REM19	Setaria	2715	2735	+	18.2687	3.73e-07	0.00185	TTTCAAAAAAAAAAAATTCTA
1743	C2C2dof_tnt.OBP3_col_a_m1	OBP3	Setaria	1657	1677	+	17.5455	4.5e-07	0.00286	TCTACTTTATTATTTTTTTCG
1744	BBRBPC_tnt.BPC1_col_a_m1	BPC1	Setaria	1615	1638	+	13.0152	5.1e-07	0.00205	AGATGAGAGAGAGAAAGAAAAAGC
1745	Trihelix_tnt.At3g14180_col_m1	At3g14180	Setaria	3197	3207	-	17.4848	5.41e-07	0.00602	TCGCCGGAGAT
1746	ND_tnt.FRS9_col_a_m1	FRS9	Setaria	1613	1633	-	15.2576	6.67e-07	0.00213	TTCTTTCTCTCTCTCATCTCT
1747	ABI3VP1_tnt.VRN1_colamp_a_m1	VRN1	Setaria	2717	2735	-	17.4028	7.23e-07	0.00466	TAGAATTTTTTTTTTTTGA
1748	BBRBPC_tnt.BPC5_colamp_a_m1	BPC5	Setaria	1611	1639	+	10.878	8.65e-07	0.00288	AAAGAGATGAGAGAGAGAAAGAAAAAGCT
1749	REM_tnt.REM19_colamp_a_m1	REM19	Setaria	2714	2734	+	16.791	9.12e-07	0.00267	TTTTCAAAAAAAAAAAATTCT
1750	ABI3VP1_tnt.VRN1_col_a_m1	VRN1	Setaria	2342	2370	+	2.1194	9.9e-07	0.00115	ATTGTGACATGCTTGTCTTTTTTTTTTGT
1751	C2C2dof_tnt.At4g38000_col_a_m1	At4g38000	Setaria	1610	1637	-	16.6667	1.09e-06	0.0023	CTTTTTCTTTCTCTCTCTCATCTCTTTC
1752	BBRBPC_tnt.BPC1_colamp_a_m1	BPC1	Setaria	1623	1637	-	16.1818	1.1e-06	0.00791	CTTTTTCTTTCTCTC
1753	BBRBPC_tnt.BPC1_colamp_a_m1	BPC1	Setaria	1621	1635	-	16.1364	1.12e-06	0.00791	TTTTCTTTCTCTCTC
1754	ND_tnt.FRS9_col_a_m1	FRS9	Setaria	284	304	+	14.0606	1.15e-06	0.00294	TCTCGCCTCTCTCTCTTCCTT
1755	ND_tnt.FRS9_col_a_m1	FRS9	Setaria	1050	1070	+	14.0606	1.15e-06	0.00294	TCTCGCCTCTCTCTCTTCCTT
1756	BBRBPC_tnt.BPC1_colamp_a_m1	BPC1	Setaria	290	304	+	15.7727	1.35e-06	0.00791	CTCTCTCTCTTCCTT
1757	BBRBPC_tnt.BPC1_colamp_a_m1	BPC1	Setaria	1056	1070	+	15.7727	1.35e-06	0.00791	CTCTCTCTCTTCCTT
1758	ABI3VP1_tnt.VRN1_colamp_a_m1	VRN1	Setaria	2354	2372	+	16.2222	1.35e-06	0.00579	TTGTCTTTTTTTTTTGTTC
1759	REM_tnt.REM19_colamp_a_m1	REM19	Setaria	2713	2733	+	15.7612	1.64e-06	0.0032	CTTTTCAAAAAAAAAAAATTC
1760	ABI3VP1_tnt.VRN1_colamp_a_m1	VRN1	Setaria	2353	2371	+	15.7361	1.72e-06	0.00651	CTTGTCTTTTTTTTTTGTT
1761	C2C2dof_tnt.AT1G69570_colamp_a_m1	AT1G69570	Setaria	1619	1639	+	15.7879	1.74e-06	0.0283	GAGAGAGAGAAAGAAAAAGCT
1762	BBRBPC_tnt.BPC1_col_a_m1	BPC1	Setaria	1619	1642	+	9.87879	1.79e-06	0.00473	GAGAGAGAGAAAGAAAAAGCTTAT
1763	REM_tnt.REM19_colamp_a_m1	REM19	Setaria	2356	2376	-	15.5522	1.84e-06	0.0032	ATACGAACAAAAAAAAAAGAC
1764	REM_tnt.REM19_col_a_m1	REM19	Setaria	2358	2372	-	16.2537	1.85e-06	0.00774	GAACAAAAAAAAAAG
1765	REM_tnt.REM19_col_a_m1	REM19	Setaria	2355	2369	-	15.8806	2.46e-06	0.00774	CAAAAAAAAAAGACA
1766	ND_tnt.FRS9_col_a_m1	FRS9	Setaria	288	308	+	12.1818	2.6e-06	0.00573	GCCTCTCTCTCTTCCTTTTTT
1767	ND_tnt.FRS9_col_a_m1	FRS9	Setaria	1054	1074	+	12.1818	2.6e-06	0.00573	GCCTCTCTCTCTTCCTTTTTT
1768	BBRBPC_tnt.BPC1_col_a_m1	BPC1	Setaria	1611	1634	+	8.51515	3.01e-06	0.00629	AAAGAGATGAGAGAGAGAAAGAAA
1769	REM_tnt.REM19_colamp_a_m1	REM19	Setaria	2355	2375	-	14.4328	3.35e-06	0.00438	TACGAACAAAAAAAAAAGACA
1770	REM_tnt.REM19_col_a_m1	REM19	Setaria	2356	2370	-	15.2836	3.64e-06	0.00867	ACAAAAAAAAAAGAC
1771	BBRBPC_tnt.BPC5_colamp_a_m1	BPC5	Setaria	1605	1633	+	6.18293	4.21e-06	0.00774	GGTGAGAAAGAGATGAGAGAGAGAAAGAA
1772	C2C2dof_tnt.AT5G66940_colamp_a_m1	AT5G66940	Setaria	1653	1673	+	14.8182	4.28e-06	0.0403	AGAATCTACTTTATTATTTTT
1773	BBRBPC_tnt.BPC5_col_a_m1	BPC5	Setaria	280	309	-	-31	4.31e-06	0.0121	AAAAAAAGGAAGAGAGAGAGGCGAGATGTG
1774	BBRBPC_tnt.BPC5_col_a_m1	BPC5	Setaria	1046	1075	-	-31	4.31e-06	0.0121	AAAAAAAGGAAGAGAGAGAGGCGAGATGTG
1775	C2C2dof_tnt.AT1G69570_col_a_m1	AT1G69570	Setaria	1611	1637	-	14.7424	4.31e-06	0.0162	CTTTTTCTTTCTCTCTCTCATCTCTTT
1776	BBRBPC_tnt.BPC1_colamp_a_m1	BPC1	Setaria	1617	1631	-	13.3333	4.32e-06	0.0164	CTTTCTCTCTCTCAT
1777	REM_tnt.REM19_col_a_m1	REM19	Setaria	54	68	+	14.8955	4.64e-06	0.00918	GTAAAATAAAAAAAA
1778	REM_tnt.REM19_colamp_a_m1	REM19	Setaria	2357	2377	-	13.791	4.66e-06	0.00517	CATACGAACAAAAAAAAAAGA
1779	ABI3VP1_tnt.VRN1_colamp_a_m1	VRN1	Setaria	2355	2373	+	13.2778	5.27e-06	0.0106	TGTCTTTTTTTTTTGTTCG
1780	C2C2dof_tnt.At4g38000_col_a_m1	At4g38000	Setaria	1631	1658	-	14.4091	5.45e-06	0.00651	GATTCTTTCTTTTCCAATAAGCTTTTTC
1781	BBRBPC_tnt.BPC1_colamp_a_m1	BPC1	Setaria	286	300	+	12.7727	5.59e-06	0.0164	TCGCCTCTCTCTCTT
1782	BBRBPC_tnt.BPC1_colamp_a_m1	BPC1	Setaria	1052	1066	+	12.7727	5.59e-06	0.0164	TCGCCTCTCTCTCTT
1783	C2C2dof_tnt.AT1G69570_col_a_m1	AT1G69570	Setaria	1617	1643	-	14.3485	5.61e-06	0.02	AATAAGCTTTTTCTTTCTCTCTCTCAT
1784	BBRBPC_tnt.BPC1_col_a_m1	BPC1	Setaria	285	308	-	6.80303	5.64e-06	0.00915	AAAAAAGGAAGAGAGAGAGGCGAG
1785	BBRBPC_tnt.BPC1_col_a_m1	BPC1	Setaria	1051	1074	-	6.80303	5.64e-06	0.00915	AAAAAAGGAAGAGAGAGAGGCGAG
1786	C2C2dof_tnt.OBP3_colamp_a_m1	OBP3	Setaria	290	308	+	14.1061	5.69e-06	0.0262	CTCTCTCTCTTCCTTTTTT
1787	C2C2dof_tnt.OBP3_colamp_a_m1	OBP3	Setaria	1056	1074	+	14.1061	5.69e-06	0.0262	CTCTCTCTCTTCCTTTTTT
1788	REM_tnt.REM19_col_a_m1	REM19	Setaria	2716	2730	+	14.5672	5.82e-06	0.0103	TTCAAAAAAAAAAAA
1789	ABI3VP1_tnt.VRN1_colamp_a_m1	VRN1	Setaria	2358	2376	+	12.9444	6.06e-06	0.0115	CTTTTTTTTTTGTTCGTAT
1790	ABI3VP1_tnt.VRN1_col_a_m1	VRN1	Setaria	2344	2372	+	-5.44776	6.45e-06	0.00394	TGTGACATGCTTGTCTTTTTTTTTTGTTC
1791	C2C2dof_tnt.AT5G66940_col_a_m1	AT5G66940	Setaria	1625	1653	-	14.1667	6.82e-06	0.0173	TTTCTTTTCCAATAAGCTTTTTCTTTCTC
1792	REM_tnt.REM19_col_a_m1	REM19	Setaria	2359	2373	-	14.3134	6.86e-06	0.0108	CGAACAAAAAAAAAA
1793	BBRBPC_tnt.BPC1_col_a_m1	BPC1	Setaria	289	312	-	6.21212	6.96e-06	0.00979	CGCAAAAAAAGGAAGAGAGAGAGG
1794	BBRBPC_tnt.BPC1_col_a_m1	BPC1	Setaria	1055	1078	-	6.21212	6.96e-06	0.00979	CGCAAAAAAAGGAAGAGAGAGAGG
1795	REM_tnt.REM19_colamp_a_m1	REM19	Setaria	2353	2373	-	12.791	7.67e-06	0.00667	CGAACAAAAAAAAAAGACAAG
1796	BBRBPC_tnt.BPC5_colamp_a_m1	BPC5	Setaria	1607	1635	+	4.02439	8.21e-06	0.0102	TGAGAAAGAGATGAGAGAGAGAAAGAAAA
1797	BBRBPC_tnt.BPC5_col_a_m1	BPC5	Setaria	1620	1649	+	-35.1184	8.9e-06	0.0164	AGAGAGAGAAAGAAAAAGCTTATTGGAAAA
1798	ABI3VP1_tnt.VRN1_col_a_m1	VRN1	Setaria	2349	2377	+	-7	9.21e-06	0.00495	CATGCTTGTCTTTTTTTTTTGTTCGTATG
1799	BBRBPC_tnt.BPC1_col_a_m1	BPC1	Setaria	1609	1632	+	5.28788	9.62e-06	0.0115	AGAAAGAGATGAGAGAGAGAAAGA
1800	ABI3VP1_tnt.VRN1_col_a_m1	VRN1	Setaria	2715	2743	-	-7.23881	9.72e-06	0.00513	ACCAAAGTTAGAATTTTTTTTTTTTGAAA
1801	BBRBPC_tnt.BPC1_colamp_a_m1	BPC1	Setaria	288	302	+	11.4697	9.8e-06	0.0234	GCCTCTCTCTCTTCC
1802	BBRBPC_tnt.BPC1_colamp_a_m1	BPC1	Setaria	1054	1068	+	11.4697	9.8e-06	0.0234	GCCTCTCTCTCTTCC
1803	ABI3VP1_tnt.VRN1_col_a_m1	VRN1	Setaria	2346	2374	+	-7.28358	9.81e-06	0.00514	TGACATGCTTGTCTTTTTTTTTTGTTCGT
1804	BBRBPC_tnt.BPC5_col_a_m1	BPC5	Setaria	1610	1639	+	-35.9605	1.05e-05	0.0168	GAAAGAGATGAGAGAGAGAAAGAAAAAGCT
1805	REM_tnt.REM19_col_a_m1	REM19	Setaria	2717	2731	+	13.4179	1.15e-05	0.0149	TCAAAAAAAAAAAAT
1806	C2C2dof_tnt.At4g38000_col_a_m1	At4g38000	Setaria	281	308	+	13.1667	1.21e-05	0.0113	ACATCTCGCCTCTCTCTCTTCCTTTTTT
1807	C2C2dof_tnt.At4g38000_col_a_m1	At4g38000	Setaria	1047	1074	+	13.1667	1.21e-05	0.0113	ACATCTCGCCTCTCTCTCTTCCTTTTTT
1808	REM_tnt.REM19_col_a_m1	REM19	Setaria	2354	2368	-	13.3134	1.23e-05	0.0151	AAAAAAAAAAGACAA
1809	ABI3VP1_tnt.VRN1_col_a_m1	VRN1	Setaria	782	810	+	-8.31343	1.23e-05	0.00565	GAGTATATATTTGCAATTTTTTTATTGGA
1810	C2H2_tnt.TF3A_col_a_m1	TF3A	Setaria	289	307	+	12.416	1.31e-05	0.0286	CCTCTCTCTCTTCCTTTTT
1811	C2H2_tnt.TF3A_col_a_m1	TF3A	Setaria	1055	1073	+	12.416	1.31e-05	0.0286	CCTCTCTCTCTTCCTTTTT
1812	REM_tnt.REM19_colamp_a_m1	REM19	Setaria	1661	1681	-	11.597	1.35e-05	0.00896	TTTCCGAAAAAAATAATAAAG
1813	BBRBPC_tnt.BPC5_colamp_a_m1	BPC5	Setaria	1603	1631	+	2.28049	1.38e-05	0.0138	TTGGTGAGAAAGAGATGAGAGAGAGAAAG
1814	ABI3VP1_tnt.VRN1_colamp_a_m1	VRN1	Setaria	1622	1640	-	10.6806	1.46e-05	0.0167	AAGCTTTTTCTTTCTCTCT
1815	BBRBPC_tnt.BPC5_colamp_a_m1	BPC5	Setaria	4432	4460	+	1.95122	1.51e-05	0.0145	ATGGGAAAAATAGTCTGATAGAGAAAGAT
1816	C2C2dof_tnt.AT1G69570_col_a_m1	AT1G69570	Setaria	1630	1656	-	12.6061	1.67e-05	0.0333	TTCTTTCTTTTCCAATAAGCTTTTTCT
1817	BBRBPC_tnt.BPC1_col_a_m1	BPC1	Setaria	4434	4457	+	3.60606	1.7e-05	0.016	GGGAAAAATAGTCTGATAGAGAAA
1818	ABI3VP1_tnt.VRN1_col_a_m1	VRN1	Setaria	2347	2375	+	-9.80597	1.71e-05	0.00673	GACATGCTTGTCTTTTTTTTTTGTTCGTA
1819	BBRBPC_tnt.BPC1_colamp_a_m1	BPC1	Setaria	1625	1639	-	10.0455	1.75e-05	0.0332	AGCTTTTTCTTTCTC
1820	REM_tnt.REM19_colamp_a_m1	REM19	Setaria	1659	1679	-	10.9851	1.79e-05	0.0106	TCCGAAAAAAATAATAAAGTA
1821	BBRBPC_tnt.BPC1_col_a_m1	BPC1	Setaria	291	314	-	3.45455	1.79e-05	0.0162	GCCGCAAAAAAAGGAAGAGAGAGA
1822	BBRBPC_tnt.BPC1_col_a_m1	BPC1	Setaria	1057	1080	-	3.45455	1.79e-05	0.0162	GCCGCAAAAAAAGGAAGAGAGAGA
1823	C2C2dof_tnt.At4g38000_col_a_m1	At4g38000	Setaria	1608	1635	-	12.4545	1.87e-05	0.0148	TTTTCTTTCTCTCTCTCATCTCTTTCTC
1824	C2H2_tnt.TF3A_col_a_m1	TF3A	Setaria	3293	3311	+	11.768	1.89e-05	0.0317	CCTCCTCATCAATTTCCTG
1825	C2H2_tnt.TF3A_col_a_m1	TF3A	Setaria	3429	3447	-	11.768	1.89e-05	0.0317	CTTCACCTTAATCATCCAC
1826	BBRBPC_tnt.BPC1_col_a_m1	BPC1	Setaria	287	310	-	3.09091	2.02e-05	0.0168	CAAAAAAAGGAAGAGAGAGAGGCG
1827	BBRBPC_tnt.BPC1_col_a_m1	BPC1	Setaria	1053	1076	-	3.09091	2.02e-05	0.0168	CAAAAAAAGGAAGAGAGAGAGGCG
1828	REM_tnt.REM19_colamp_a_m1	REM19	Setaria	1662	1682	-	10.597	2.13e-05	0.012	TTTTCCGAAAAAAATAATAAA
1829	BBRBPC_tnt.BPC1_colamp_a_m1	BPC1	Setaria	2270	2284	+	9.5	2.16e-05	0.0345	TATTCTCTGTCTCTT
1830	C2C2dof_tnt.OBP3_col_a_m1	OBP3	Setaria	1621	1641	-	12.4697	2.17e-05	0.0236	TAAGCTTTTTCTTTCTCTCTC
1831	BBRBPC_tnt.BPC1_col_a_m1	BPC1	Setaria	281	304	-	2.84848	2.19e-05	0.0175	AAGGAAGAGAGAGAGGCGAGATGT
1832	BBRBPC_tnt.BPC1_col_a_m1	BPC1	Setaria	1047	1070	-	2.84848	2.19e-05	0.0175	AAGGAAGAGAGAGAGGCGAGATGT
1833	REM_tnt.REM19_colamp_a_m1	REM19	Setaria	2799	2819	-	10.4776	2.24e-05	0.0122	ATCTAAAAAAATCAAAACGAC
1834	ABI3VP1_tnt.VRN1_colamp_a_m1	VRN1	Setaria	2357	2375	+	9.47222	2.25e-05	0.0201	TCTTTTTTTTTTGTTCGTA
1835	REM_tnt.REM19_colamp_a_m1	REM19	Setaria	2351	2371	-	10.4627	2.26e-05	0.0122	AACAAAAAAAAAAGACAAGCA
1836	C2C2dof_tnt.At4g38000_col_a_m1	At4g38000	Setaria	464	491	+	12.1212	2.28e-05	0.0161	CACATTTTAAAATAATCCTAACTTTTTC
1837	C2C2dof_tnt.OBP3_col_a_m1	OBP3	Setaria	1615	1635	-	12.2727	2.45e-05	0.0241	TTTTCTTTCTCTCTCTCATCT
1838	REM_tnt.REM19_col_a_m1	REM19	Setaria	823	837	+	12.0149	2.49e-05	0.0206	GTAAAATAAAAAAAT
1839	ND_tnt.FRS9_col_a_m1	FRS9	Setaria	282	302	+	6.27273	2.51e-05	0.025	CATCTCGCCTCTCTCTCTTCC
1840	ND_tnt.FRS9_col_a_m1	FRS9	Setaria	1048	1068	+	6.27273	2.51e-05	0.025	CATCTCGCCTCTCTCTCTTCC
1841	BBRBPC_tnt.BPC5_col_a_m1	BPC5	Setaria	1616	1645	+	-41.0526	2.52e-05	0.0285	GATGAGAGAGAGAAAGAAAAAGCTTATTGG
1842	REM_tnt.REM19_col_a_m1	REM19	Setaria	2360	2374	-	11.9552	2.56e-05	0.0207	ACGAACAAAAAAAAA
1843	C2C2dof_tnt.AT1G69570_col_a_m1	AT1G69570	Setaria	1655	1681	+	11.8636	2.57e-05	0.0434	AATCTACTTTATTATTTTTTTCGGAAA
1844	REM_tnt.REM19_col_a_m1	REM19	Setaria	2361	2375	-	11.8955	2.65e-05	0.0211	TACGAACAAAAAAAA
1845	C2C2dof_tnt.AT1G69570_col_a_m1	AT1G69570	Setaria	2352	2378	+	11.7727	2.7e-05	0.0434	GCTTGTCTTTTTTTTTTGTTCGTATGC
1846	BBRBPC_tnt.BPC1_col_a_m1	BPC1	Setaria	4436	4459	+	2.15152	2.74e-05	0.0206	GAAAAATAGTCTGATAGAGAAAGA
1847	BBRBPC_tnt.BPC1_colamp_a_m1	BPC1	Setaria	1615	1629	-	8.80303	2.82e-05	0.0379	TTCTCTCTCTCATCT
1848	REM_tnt.REM19_col_a_m1	REM19	Setaria	1663	1677	-	11.7463	2.86e-05	0.0225	CGAAAAAAATAATAA
1849	ABI3VP1_tnt.VRN1_col_a_m1	VRN1	Setaria	1652	1680	+	-12.2537	2.87e-05	0.00932	AAGAATCTACTTTATTATTTTTTTCGGAA
1850	ABI3VP1_tnt.VRN1_colamp_a_m1	VRN1	Setaria	4942	4960	+	8.66667	2.96e-05	0.0226	TAGCTTTTTTTTTCCGAAG
1851	C2C2dof_tnt.At4g38000_col_a_m1	At4g38000	Setaria	1625	1652	-	11.6515	2.99e-05	0.0172	TTCTTTTCCAATAAGCTTTTTCTTTCTC
1852	ABI3VP1_tnt.VRN1_colamp_a_m1	VRN1	Setaria	2714	2732	-	8.52778	3.1e-05	0.0226	AATTTTTTTTTTTTGAAAA
1853	ABI3VP1_tnt.VRN1_colamp_a_m1	VRN1	Setaria	2359	2377	+	8.5	3.13e-05	0.0226	TTTTTTTTTTGTTCGTATG
1854	C2C2dof_tnt.AT1G69570_col_a_m1	AT1G69570	Setaria	4107	4133	+	11.4848	3.18e-05	0.0473	TCTGACCTTTTGCAATTTCCTTGTTCA
1855	C2H2_tnt.TF3A_col_a_m1	TF3A	Setaria	1619	1637	-	10.744	3.32e-05	0.0389	CTTTTTCTTTCTCTCTCTC
1856	ABI3VP1_tnt.VRN1_colamp_a_m1	VRN1	Setaria	2314	2332	+	8.30556	3.34e-05	0.0226	ATGTATTGTTGTTTCTTTG
1857	ABI3VP1_tnt.VRN1_col_a_m1	VRN1	Setaria	2717	2745	-	-13.1343	3.44e-05	0.0106	GGACCAAAGTTAGAATTTTTTTTTTTTGA
1858	C2C2dof_tnt.AT5G66940_col_a_m1	AT5G66940	Setaria	286	314	+	11.5152	3.54e-05	0.0442	TCGCCTCTCTCTCTTCCTTTTTTTGCGGC
1859	C2C2dof_tnt.AT5G66940_col_a_m1	AT5G66940	Setaria	1052	1080	+	11.5152	3.54e-05	0.0442	TCGCCTCTCTCTCTTCCTTTTTTTGCGGC
1860	ABI3VP1_tnt.VRN1_colamp_a_m1	VRN1	Setaria	2715	2733	-	8.02778	3.65e-05	0.0239	GAATTTTTTTTTTTTGAAA
1861	C2H2_tnt.TF3A_col_a_m1	TF3A	Setaria	286	304	+	10.56	3.66e-05	0.0389	TCGCCTCTCTCTCTTCCTT
1862	C2H2_tnt.TF3A_col_a_m1	TF3A	Setaria	1052	1070	+	10.56	3.66e-05	0.0389	TCGCCTCTCTCTCTTCCTT
1863	REM_tnt.REM19_colamp_a_m1	REM19	Setaria	821	841	+	9.29851	3.73e-05	0.0178	TTGTAAAATAAAAAAATCCTC
1864	ABI3VP1_tnt.VRN1_col_a_m1	VRN1	Setaria	2343	2371	+	-13.6866	3.85e-05	0.0114	TTGTGACATGCTTGTCTTTTTTTTTTGTT
1865	BBRBPC_tnt.BPC5_col_a_m1	BPC5	Setaria	276	305	-	-43.4079	3.86e-05	0.0356	AAAGGAAGAGAGAGAGGCGAGATGTGTGTT
1866	BBRBPC_tnt.BPC5_col_a_m1	BPC5	Setaria	1042	1071	-	-43.4079	3.86e-05	0.0356	AAAGGAAGAGAGAGAGGCGAGATGTGTGTT
1867	ABI3VP1_tnt.VRN1_col_a_m1	VRN1	Setaria	2348	2376	+	-13.8955	4.02e-05	0.0117	ACATGCTTGTCTTTTTTTTTTGTTCGTAT
1868	ABI3VP1_tnt.VRN1_col_a_m1	VRN1	Setaria	3831	3859	+	-13.8955	4.02e-05	0.0117	CGGTGGCTATGATGTATTTGTTTATTTTA
1869	C2H2_tnt.TF3A_col_a_m1	TF3A	Setaria	2184	2202	+	10.352	4.09e-05	0.0396	CCCCGGCCTTCTCCATCTC
1870	ABI3VP1_tnt.VRN1_col_a_m1	VRN1	Setaria	2351	2379	+	-14.1045	4.19e-05	0.012	TGCTTGTCTTTTTTTTTTGTTCGTATGCT
1871	BBRBPC_tnt.BPC5_col_a_m1	BPC5	Setaria	1618	1647	+	-43.9342	4.21e-05	0.0372	TGAGAGAGAGAAAGAAAAAGCTTATTGGAA
1872	BBRBPC_tnt.BPC5_col_a_m1	BPC5	Setaria	4437	4466	+	-44.1579	4.37e-05	0.0381	AAAAATAGTCTGATAGAGAAAGATCCATCA
1873	C2H2_tnt.TF3A_col_a_m1	TF3A	Setaria	1616	1634	-	10.112	4.64e-05	0.0399	TTTCTTTCTCTCTCTCATC
1874	REM_tnt.REM19_colamp_a_m1	REM19	Setaria	2350	2370	-	8.71642	4.76e-05	0.0206	ACAAAAAAAAAAGACAAGCAT
1875	ABI3VP1_tnt.VRN1_colamp_a_m1	VRN1	Setaria	2716	2734	-	6.98611	5.08e-05	0.0285	AGAATTTTTTTTTTTTGAA
1876	C2C2dof_tnt.At4g38000_col_a_m1	At4g38000	Setaria	777	804	+	10.6667	5.16e-05	0.0254	TATATGAGTATATATTTGCAATTTTTTT
1877	REM_tnt.REM19_colamp_a_m1	REM19	Setaria	52	72	+	8.46269	5.29e-05	0.0219	TTGTAAAATAAAAAAAATTCC
1878	BBRBPC_tnt.BPC5_colamp_a_m1	BPC5	Setaria	288	316	-	-2.73171	5.43e-05	0.0296	TGGCCGCAAAAAAAGGAAGAGAGAGAGGC
1879	BBRBPC_tnt.BPC5_colamp_a_m1	BPC5	Setaria	1054	1082	-	-2.73171	5.43e-05	0.0296	TGGCCGCAAAAAAAGGAAGAGAGAGAGGC
1880	REM_tnt.REM19_colamp_a_m1	REM19	Setaria	49	69	+	8.38806	5.45e-05	0.0222	TTTTTGTAAAATAAAAAAAAT
1881	C2C2dof_tnt.At4g38000_col_a_m1	At4g38000	Setaria	797	824	+	10.5606	5.47e-05	0.0262	ATTTTTTTATTGGAGCATTTATTTTTGT
1882	REM_tnt.REM19_colamp_a_m1	REM19	Setaria	2316	2336	-	8.31343	5.62e-05	0.0226	AATGCAAAGAAACAACAATAC
1883	C2H2_tnt.TF3A_col_a_m1	TF3A	Setaria	1608	1626	-	9.68	5.82e-05	0.0455	TCTCTCTCATCTCTTTCTC
1884	C2C2dof_tnt.At4g38000_col_a_m1	At4g38000	Setaria	547	574	+	10.4091	5.93e-05	0.0276	CTACAACTTTTTAATTCAAACCTTTTTT
1885	BBRBPC_tnt.BPC5_colamp_a_m1	BPC5	Setaria	1608	1636	+	-3.21951	6.16e-05	0.0319	GAGAAAGAGATGAGAGAGAGAAAGAAAAA
1886	ABI3VP1_tnt.VRN1_colamp_a_m1	VRN1	Setaria	2872	2890	-	6.33333	6.21e-05	0.0313	AAGTGGTTTTGTTTTTCTA
1887	C2C2dof_tnt.At4g38000_col_a_m1	At4g38000	Setaria	546	573	+	10.3182	6.22e-05	0.028	TCTACAACTTTTTAATTCAAACCTTTTT
1888	ABI3VP1_tnt.VRN1_col_a_m1	VRN1	Setaria	2354	2382	+	-16.1343	6.27e-05	0.0156	TTGTCTTTTTTTTTTGTTCGTATGCTTGT
1889	ABI3VP1_tnt.VRN1_col_a_m1	VRN1	Setaria	2350	2378	+	-16.209	6.36e-05	0.0157	ATGCTTGTCTTTTTTTTTTGTTCGTATGC
1890	BBRBPC_tnt.BPC5_colamp_a_m1	BPC5	Setaria	284	312	-	-3.59756	6.79e-05	0.0328	CGCAAAAAAAGGAAGAGAGAGAGGCGAGA
1891	BBRBPC_tnt.BPC5_colamp_a_m1	BPC5	Setaria	1050	1078	-	-3.59756	6.79e-05	0.0328	CGCAAAAAAAGGAAGAGAGAGAGGCGAGA
1892	BBRBPC_tnt.BPC1_col_a_m1	BPC1	Setaria	1613	1636	+	-0.939394	7.15e-05	0.0373	AGAGATGAGAGAGAGAAAGAAAAA
1893	ABI3VP1_tnt.VRN1_colamp_a_m1	VRN1	Setaria	2349	2367	+	5.86111	7.16e-05	0.0334	CATGCTTGTCTTTTTTTTT
1894	C2C2dof_tnt.OBP3_col_a_m1	OBP3	Setaria	2354	2374	+	10.3636	7.4e-05	0.042	TTGTCTTTTTTTTTTGTTCGT
1895	ABI3VP1_tnt.VRN1_col_a_m1	VRN1	Setaria	2870	2898	-	-17.1045	7.57e-05	0.0174	CAAATTACAAGTGGTTTTGTTTTTCTAGA
1896	ABI3VP1_tnt.VRN1_colamp_a_m1	VRN1	Setaria	2360	2378	+	5.65278	7.61e-05	0.0345	TTTTTTTTTGTTCGTATGC
1897	REM_tnt.REM19_colamp_a_m1	REM19	Setaria	818	838	+	7.47761	7.85e-05	0.0278	TTTTTGTAAAATAAAAAAATC
1898	ABI3VP1_tnt.VRN1_col_a_m1	VRN1	Setaria	283	311	+	-17.3731	7.97e-05	0.0181	ATCTCGCCTCTCTCTCTTCCTTTTTTTGC
1899	ABI3VP1_tnt.VRN1_col_a_m1	VRN1	Setaria	1049	1077	+	-17.3731	7.97e-05	0.0181	ATCTCGCCTCTCTCTCTTCCTTTTTTTGC
1900	BBRBPC_tnt.BPC5_colamp_a_m1	BPC5	Setaria	290	318	-	-4.45122	8.42e-05	0.0384	TTTGGCCGCAAAAAAAGGAAGAGAGAGAG
1901	BBRBPC_tnt.BPC5_colamp_a_m1	BPC5	Setaria	1056	1084	-	-4.45122	8.42e-05	0.0384	TTTGGCCGCAAAAAAAGGAAGAGAGAGAG
1902	BBRBPC_tnt.BPC1_col_a_m1	BPC1	Setaria	277	300	-	-1.51515	8.49e-05	0.0404	AAGAGAGAGAGGCGAGATGTGTGT
1903	BBRBPC_tnt.BPC1_col_a_m1	BPC1	Setaria	1043	1066	-	-1.51515	8.49e-05	0.0404	AAGAGAGAGAGGCGAGATGTGTGT
1904	ABI3VP1_tnt.VRN1_col_a_m1	VRN1	Setaria	552	580	+	-17.806	8.66e-05	0.0189	ACTTTTTAATTCAAACCTTTTTTATCTGG
1905	REM_tnt.REM19_colamp_a_m1	REM19	Setaria	4939	4959	-	7.22388	8.67e-05	0.0289	TTCGGAAAAAAAAAGCTAGGA
1906	ABI3VP1_tnt.VRN1_col_a_m1	VRN1	Setaria	2355	2383	+	-18.3284	9.56e-05	0.0197	TGTCTTTTTTTTTTGTTCGTATGCTTGTG
1907	ABI3VP1_tnt.VRN1_col_a_m1	VRN1	Setaria	2345	2373	+	-18.4179	9.72e-05	0.0198	GTGACATGCTTGTCTTTTTTTTTTGTTCG
1908	BBRBPC_tnt.BPC5_colamp_a_m1	BPC5	Setaria	2188	2216	-	-5.03659	9.73e-05	0.0417	TGGAGAAGAATCTGGAGATGGAGAAGGCC
1909	REM_tnt.REM19_colamp_a_m1	REM19	Setaria	3842	3862	-	6.92537	9.74e-05	0.0306	TAGTAAAATAAACAAATACAT
1910	ABI3VP1_tnt.VRN1_colamp_a_m1	VRN1	Setaria	2713	2731	-	4.75	9.89e-05	0.0402	ATTTTTTTTTTTTGAAAAG

## Sheet: CBP20_common
	X..motif_id	motif_alt_id	sequence_name	start	stop	strand	score	p.value	q.value	matched_sequence
1	AP2EREBP_tnt.ERF105_colamp_a_m1	ERF105	Rice	6382	6405	+	21.1212	2.54e-08	0.00125	CTGGAGCGGGCGCAGCCGCCGCCA
2	AP2EREBP_tnt.AT4G18450_col_a_m1	AT4G18450	Rice	6390	6406	-	20.7424	4.86e-08	0.00296	GTGGCGGCGGCTGCGCC
3	AP2EREBP_tnt.ERF73_colamp_a_m1	ERF73	Rice	6386	6406	-	20.6053	7.56e-08	0.00596	GTGGCGGCGGCTGCGCCCGCT
4	AP2EREBP_tnt.ERF2_colamp_a_m1	ERF2	Rice	6385	6405	+	19.6212	9.2e-08	0.00455	GAGCGGGCGCAGCCGCCGCCA
5	AP2EREBP_tnt.ERF5_colamp_a_m1	ERF5	Rice	6391	6411	+	19.8788	1.03e-07	0.00443	GCGCAGCCGCCGCCACGGACG
6	AP2EREBP_tnt.ERF105_col_m1	ERF105	Rice	6392	6406	-	19.7273	1.09e-07	0.00537	GTGGCGGCGGCTGCG
7	AP2EREBP_tnt.ERF10_col_a_m1	ERF10	Rice	6387	6407	+	19.5152	1.18e-07	0.00584	GCGGGCGCAGCCGCCGCCACG
8	AP2EREBP_tnt.ESE1_colamp_a_m1	ESE1	Rice	6388	6407	-	19.9714	1.19e-07	0.00585	CGTGGCGGCGGCTGCGCCCG
9	AP2EREBP_tnt.ERF2_col_a_m1	ERF2	Rice	6388	6408	+	19.5606	1.2e-07	0.00596	CGGGCGCAGCCGCCGCCACGG
10	AP2EREBP_tnt.ERF105_colamp_a_m1	ERF105	Rice	2381	2404	-	19.5	1.29e-07	0.00339	TCACCGACGCCTGCAGCGCCGCCT
11	mTERF_tnt.AT5G23930_col_a_m1	AT5G23930	Rice	6386	6405	+	19.4848	1.33e-07	0.0131	AGCGGGCGCAGCCGCCGCCA
12	AP2EREBP_tnt.ERF5_colamp_a_m1	ERF5	Rice	6394	6414	+	19.5	1.47e-07	0.00443	CAGCCGCCGCCACGGACGACA
13	AP2EREBP_tnt.CRF4_col_a_m1	CRF4	Rice	6394	6414	+	19.4143	1.62e-07	0.00801	CAGCCGCCGCCACGGACGACA
14	AP2EREBP_tnt.ERF105_colamp_a_m1	ERF105	Rice	6379	6402	+	19.2121	1.68e-07	0.00339	CCGCTGGAGCGGGCGCAGCCGCCG
15	AP2EREBP_tnt.ERF2_colamp_a_m1	ERF2	Rice	2381	2401	-	18.8788	2e-07	0.00659	CCGACGCCTGCAGCGCCGCCT
16	AP2EREBP_tnt.ERF104_colamp_a_m1	ERF104	Rice	6394	6408	-	18.8	2.66e-07	0.00547	CCGTGGCGGCGGCTG
17	AP2EREBP_tnt.ERF7_colamp_a_m1	ERF7	Rice	6386	6406	-	18.6061	2.69e-07	0.0246	GTGGCGGCGGCTGCGCCCGCT
18	AP2EREBP_tnt.ERF73_col_a_m1	ERF73	Rice	6391	6411	+	18.8636	2.74e-07	0.00903	GCGCAGCCGCCGCCACGGACG
19	AP2EREBP_tnt.ERF104_colamp_a_m1	ERF104	Rice	6391	6405	-	18.7571	2.77e-07	0.00547	TGGCGGCGGCTGCGC
20	C2C2gata_tnt.ZML2_col_a_m1	ZML2	Rice	5015	5033	-	16.9143	3.07e-07	0.00605	AATCATCGTCTTCTTCATC
21	MYBrelated_tnt.AT1G72740_colamp_a_m1	AT1G72740	Rice	2144	2164	-	18.4394	3.16e-07	0.0154	CTGTTTGCGATTAGGGTTTTG
22	AP2EREBP_tnt.ERF73_colamp_a_m1	ERF73	Rice	2380	2400	+	18.5263	3.34e-07	0.00596	GAGGCGGCGCTGCAGGCGTCG
23	AP2EREBP_tnt.ERF2_col_a_m1	ERF2	Rice	6385	6405	+	18.3182	3.59e-07	0.0089	GAGCGGGCGCAGCCGCCGCCA
24	AP2EREBP_tnt.CRF4_col_a_m1	CRF4	Rice	6391	6411	+	18.3	3.62e-07	0.00892	GCGCAGCCGCCGCCACGGACG
25	AP2EREBP_tnt.ERF104_col_a_m1	ERF104	Rice	6389	6407	+	18.303	3.8e-07	0.014	GGGCGCAGCCGCCGCCACG
26	AP2EREBP_tnt.CRF4_colamp_a_m1	CRF4	Rice	6391	6405	-	18.1364	4.49e-07	0.0118	TGGCGGCGGCTGCGC
27	AP2EREBP_tnt.ESE1_col_a_m1	ESE1	Rice	6391	6405	-	18.1212	4.62e-07	0.0111	TGGCGGCGGCTGCGC
28	AP2EREBP_tnt.ERF5_col_a_m1	ERF5	Rice	6391	6405	+	17.7424	5.3e-07	0.0159	GCGCAGCCGCCGCCA
29	AP2EREBP_tnt.ERF2_colamp_a_m1	ERF2	Rice	6382	6402	+	17.803	5.5e-07	0.0133	CTGGAGCGGGCGCAGCCGCCG
30	AP2EREBP_tnt.ESE1_col_a_m1	ESE1	Rice	6394	6408	-	17.8939	5.61e-07	0.0111	CCGTGGCGGCGGCTG
31	AP2EREBP_tnt.CRF4_col_a_m1	CRF4	Rice	6211	6231	-	17.6571	5.63e-07	0.00924	GCGCAGCCGCCTCGTCCTCCT
32	AP2EREBP_tnt.ERF104_col_a_m1	ERF104	Rice	6386	6404	+	17.803	5.67e-07	0.014	AGCGGGCGCAGCCGCCGCC
33	AP2EREBP_tnt.ERF7_col_a_m1	ERF7	Rice	2381	2401	-	17.3485	6.22e-07	0.0133	CCGACGCCTGCAGCGCCGCCT
34	AP2EREBP_tnt.ERF5_col_a_m1	ERF5	Rice	5971	5985	+	17.4848	6.42e-07	0.0159	CCAGCGCCGGCGCCG
35	AP2EREBP_tnt.ERF73_colamp_a_m1	ERF73	Rice	5969	5989	-	17.4342	6.75e-07	0.00834	ACCGCGGCGCCGGCGCTGGTG
36	AP2EREBP_tnt.ERF48_col_a_m1	ERF48	Rice	2385	2405	+	17.1857	7.32e-07	0.0145	GGCGCTGCAGGCGTCGGTGAC
37	C2C2gata_tnt.GATA15_col_b_m1	GATA15	Rice	5018	5036	-	16.0141	7.71e-07	0.00692	CATAATCATCGTCTTCTTC
38	AP2EREBP_tnt.AT4G18450_col_a_m1	AT4G18450	Rice	6387	6403	-	17.5303	7.9e-07	0.0146	GCGGCGGCTGCGCCCGC
39	AP2EREBP_tnt.ESE1_colamp_a_m1	ESE1	Rice	2379	2398	+	17.1429	8.38e-07	0.0118	CGAGGCGGCGCTGCAGGCGT
40	mTERF_tnt.AT5G23930_col_a_m1	AT5G23930	Rice	2381	2400	-	16.9242	9.62e-07	0.0136	CGACGCCTGCAGCGCCGCCT
41	AP2EREBP_tnt.CRF4_colamp_a_m1	CRF4	Rice	6394	6408	-	16.8182	1.16e-06	0.0191	CCGTGGCGGCGGCTG
42	C2C2gata_tnt.GATA15_col_b_m1	GATA15	Rice	5021	5039	-	15.0563	1.27e-06	0.0104	TATCATAATCATCGTCTTC
43	AP2EREBP_tnt.AT4G18450_col_a_m1	AT4G18450	Rice	2380	2396	+	16.7879	1.33e-06	0.0146	GAGGCGGCGCTGCAGGC
44	AP2EREBP_tnt.SHN3_col_a_m1	SHN3	Rice	2382	2402	-	15.2958	1.38e-06	0.0161	ACCGACGCCTGCAGCGCCGCC
45	AP2EREBP_tnt.ERF104_col_a_m1	ERF104	Rice	2379	2397	-	16.5758	1.41e-06	0.0155	CGCCTGCAGCGCCGCCTCG
46	C2C2gata_tnt.GATA15_col_b_m1	GATA15	Rice	2478	2496	-	14.7606	1.47e-06	0.0112	CATGATGATCTTCCTGATC
47	C2C2gata_tnt.ZML2_col_a_m1	ZML2	Rice	5012	5030	-	13.5429	1.49e-06	0.0105	CATCGTCTTCTTCATCAGA
48	ABI3VP1_tnt.VRN1_colamp_a_m1	VRN1	Rice	1089	1107	+	16.0278	1.49e-06	0.0201	ATTTATTTTTTTTCTCTTC
49	REM_tnt.REM19_colamp_a_m1	REM19	Rice	1086	1106	-	15.9104	1.51e-06	0.0129	AAGAGAAAAAAAATAAATAAC
50	REM_tnt.REM19_colamp_a_m1	REM19	Rice	1089	1109	-	15.8507	1.56e-06	0.0129	TTGAAGAGAAAAAAAATAAAT
51	AP2EREBP_tnt.SHN3_col_a_m1	SHN3	Rice	6212	6232	-	14.9577	1.66e-06	0.0162	TGCGCAGCCGCCTCGTCCTCC
52	HMG_tnt.3XHMGBOX1_col_a_m1	3XHMGBOX1	Rice	2380	2400	+	15.7143	1.69e-06	0.0226	GAGGCGGCGCTGCAGGCGTCG
53	AP2EREBP_tnt.ESE1_colamp_a_m1	ESE1	Rice	6385	6404	-	15.8714	1.79e-06	0.0161	GGCGGCGGCTGCGCCCGCTC
54	mTERF_tnt.AT5G23930_col_a_m1	AT5G23930	Rice	5700	5719	+	15.9545	1.88e-06	0.0155	ATCCGCTCCTACCGCAGCCG
55	AP2EREBP_tnt.CRF4_col_a_m1	CRF4	Rice	2372	2392	-	15.7429	1.91e-06	0.0171	GCAGCGCCGCCTCGTACTCCT
56	AP2EREBP_tnt.ERF105_col_m1	ERF105	Rice	6395	6409	-	16.2576	2.16e-06	0.0427	TCCGTGGCGGCGGCT
57	MYBrelated_tnt.AT1G72740_col_a_m1	AT1G72740	Rice	2143	2157	+	16.2143	2.25e-06	0.0373	GCAAAACCCTAATCG
58	AP2EREBP_tnt.ERF7_col_a_m1	ERF7	Rice	6385	6405	+	15.5303	2.48e-06	0.0204	GAGCGGGCGCAGCCGCCGCCA
59	AP2EREBP_tnt.ERF5_colamp_a_m1	ERF5	Rice	6211	6231	-	15.8333	2.52e-06	0.0266	GCGCAGCCGCCTCGTCCTCCT
60	MYBrelated_tnt.AT1G72740_col_a_m1	AT1G72740	Rice	2237	2251	+	15.8714	2.73e-06	0.0388	CCGAAACCCTAGCTA
61	AP2EREBP_tnt.ERF10_col_a_m1	ERF10	Rice	2379	2399	-	15.6364	2.76e-06	0.0211	GACGCCTGCAGCGCCGCCTCG
62	AP2EREBP_tnt.ERF5_col_a_m1	ERF5	Rice	6394	6408	+	15.3485	2.93e-06	0.0322	CAGCCGCCGCCACGG
63	mTERF_tnt.AT5G23930_col_a_m1	AT5G23930	Rice	6383	6402	+	15.2727	2.94e-06	0.0222	TGGAGCGGGCGCAGCCGCCG
64	AP2EREBP_tnt.ERF2_col_a_m1	ERF2	Rice	2378	2398	-	15.4394	3.01e-06	0.0241	ACGCCTGCAGCGCCGCCTCGT
65	AP2EREBP_tnt.SHN3_col_a_m1	SHN3	Rice	6390	6410	+	13.7465	3.12e-06	0.0229	GGCGCAGCCGCCGCCACGGAC
66	AP2EREBP_tnt.ERF48_col_a_m1	ERF48	Rice	2382	2402	+	14.9	3.15e-06	0.0283	GGCGGCGCTGCAGGCGTCGGT
67	HMG_tnt.3XHMGBOX1_col_a_m1	3XHMGBOX1	Rice	6386	6406	-	15	3.24e-06	0.0245	GTGGCGGCGGCTGCGCCCGCT
68	C2C2gata_tnt.GATA15_col_b_m1	GATA15	Rice	5015	5033	-	13.1549	3.25e-06	0.0139	AATCATCGTCTTCTTCATC
69	AP2EREBP_tnt.ERF7_colamp_a_m1	ERF7	Rice	2380	2400	+	15.5909	3.37e-06	0.0333	GAGGCGGCGCTGCAGGCGTCG
70	LOBAS2_tnt.LOB_col_a_m1	LOB	Rice	2391	2411	-	14.7576	3.4e-06	0.0343	TACACCGTCACCGACGCCTGC
71	C2C2gata_tnt.ZML2_col_a_m1	ZML2	Rice	5018	5036	-	11.4857	3.58e-06	0.0165	CATAATCATCGTCTTCTTC
72	REM_tnt.REM19_col_a_m1	REM19	Rice	1091	1105	-	15.2836	3.64e-06	0.0206	AGAGAAAAAAAATAA
73	C2C2gata_tnt.ZML2_col_a_m1	ZML2	Rice	5009	5027	-	11.4143	3.69e-06	0.0165	CGTCTTCTTCATCAGAATC
74	C2H2_tnt.TF3A_col_a_m1	TF3A	Rice	2547	2565	+	14.512	3.76e-06	0.0295	CCCTCTCCTTTCCTTCCTC
75	LOBAS2_tnt.LOB_col_a_m1	LOB	Rice	6115	6135	-	14.5909	3.77e-06	0.0343	CCCTCCGGGGCACCCGCCGGT
76	AP2EREBP_tnt.ESE1_colamp_a_m1	ESE1	Rice	5702	5721	-	14.5	3.78e-06	0.0207	CGCGGCTGCGGTAGGAGCGG
77	C2C2gata_tnt.ZML1_col_a_m1	ZML1	Rice	5008	5022	-	11.1818	4.08e-06	0.0265	TCTTCATCAGAATCA
78	ABI3VP1_tnt.VRN1_col_a_m1	VRN1	Rice	1078	1106	+	-3.83582	4.42e-06	0.0166	GCAGTATAGTTATTTATTTTTTTTCTCTT
79	AP2EREBP_tnt.SHN3_col_a_m1	SHN3	Rice	6393	6413	+	13	4.54e-06	0.0262	GCAGCCGCCGCCACGGACGAC
80	BBRBPC_tnt.BPC5_colamp_a_m1	BPC5	Rice	2549	2577	-	5.78049	4.78e-06	0.0283	AAAAAACGGATTGAGGAAGGAAAGGAGAG
81	AP2EREBP_tnt.ERF73_col_a_m1	ERF73	Rice	6388	6408	+	14.6061	4.83e-06	0.0483	CGGGCGCAGCCGCCGCCACGG
82	AP2EREBP_tnt.CRF4_colamp_a_m1	CRF4	Rice	5974	5988	-	14.4091	5.13e-06	0.0475	CCGCGGCGCCGGCGC
83	LOBAS2_tnt.LOB_col_a_m1	LOB	Rice	2367	2387	-	14.0455	5.22e-06	0.0343	GCCGCCTCGTACTCCTCCTGC
84	LOBAS2_tnt.LOB_col_a_m1	LOB	Rice	2382	2402	-	14.0455	5.22e-06	0.0343	ACCGACGCCTGCAGCGCCGCC
85	AP2EREBP_tnt.CRF4_colamp_a_m1	CRF4	Rice	5971	5985	-	14.3636	5.27e-06	0.0475	CGGCGCCGGCGCTGG
86	C2C2gata_tnt.ZML2_col_a_m1	ZML2	Rice	3903	3921	-	10.4714	5.44e-06	0.0223	CATTTTCATCAGTATGAAC
87	AP2EREBP_tnt.ERF7_col_a_m1	ERF7	Rice	5968	5988	+	14.2424	6.02e-06	0.0372	GCACCAGCGCCGGCGCCGCGG
88	C2H2_tnt.TF3A_col_a_m1	TF3A	Rice	2271	2289	+	13.712	6.12e-06	0.0295	CCTCCTCTCGCCCTTCCTC
89	ABI3VP1_tnt.VRN1_colamp_a_m1	VRN1	Rice	1090	1108	+	12.8889	6.2e-06	0.0319	TTTATTTTTTTTCTCTTCA
90	C2C2gata_tnt.ZML1_col_a_m1	ZML1	Rice	5017	5031	-	9.92424	6.32e-06	0.0324	TCATCGTCTTCTTCA
91	BBRBPC_tnt.BPC1_col_a_m1	BPC1	Rice	1511	1534	-	6.4697	6.35e-06	0.0211	GATAAAAGATGAGAGAGAAAAGCA
92	BBRBPC_tnt.BPC1_colamp_a_m1	BPC1	Rice	1510	1524	+	12.3939	6.54e-06	0.0458	CTGCTTTTCTCTCTC
93	AP2EREBP_tnt.ERF73_col_a_m1	ERF73	Rice	2375	2395	-	14.0455	6.57e-06	0.0483	CCTGCAGCGCCGCCTCGTACT
94	C2C2gata_tnt.ZML1_col_a_m1	ZML1	Rice	5014	5028	-	9.63636	6.95e-06	0.0324	TCGTCTTCTTCATCA
95	AP2EREBP_tnt.ERF104_colamp_a_m1	ERF104	Rice	2174	2188	-	14.2714	7.03e-06	0.0434	GAGCGGCGGCCGCGC
96	AP2EREBP_tnt.ERF104_col_a_m1	ERF104	Rice	5969	5987	+	14.0606	7.08e-06	0.035	CACCAGCGCCGGCGCCGCG
97	LOBAS2_tnt.LOB_col_a_m1	LOB	Rice	2379	2399	-	13.5152	7.1e-06	0.0383	GACGCCTGCAGCGCCGCCTCG
98	AP2EREBP_tnt.ERF5_colamp_a_m1	ERF5	Rice	2372	2392	-	14.0303	7.24e-06	0.0421	GCAGCGCCGCCTCGTACTCCT
99	AP2EREBP_tnt.SHN3_col_a_m1	SHN3	Rice	2394	2414	-	12.0423	7.26e-06	0.0305	ACGTACACCGTCACCGACGCC
100	ABI3VP1_tnt.VRN1_col_a_m1	VRN1	Rice	2981	3009	+	-6.01493	7.35e-06	0.0218	GTTTCTTGTTTTTTACCCTTTGTTTGGTT
101	AP2EREBP_tnt.ERF73_colamp_a_m1	ERF73	Rice	6383	6403	-	13.0526	7.36e-06	0.036	GCGGCGGCTGCGCCCGCTCCA
102	AP2EREBP_tnt.SHN3_col_a_m1	SHN3	Rice	6387	6407	+	12.0141	7.36e-06	0.0305	GCGGGCGCAGCCGCCGCCACG
103	AP2EREBP_tnt.ERF5_col_a_m1	ERF5	Rice	2381	2395	-	13.803	7.69e-06	0.0477	CCTGCAGCGCCGCCT
104	C2H2_tnt.TF3A_col_a_m1	TF3A	Rice	3574	3592	-	13.328	7.69e-06	0.0295	CCGCATCTTCAGCATCCTC
105	AP2EREBP_tnt.ERF10_col_a_m1	ERF10	Rice	6384	6404	+	13.9394	8.06e-06	0.0332	GGAGCGGGCGCAGCCGCCGCC
106	REM_tnt.REM19_col_a_m1	REM19	Rice	1087	1101	-	13.9851	8.32e-06	0.0364	AAAAAAAATAAATAA
107	AP2EREBP_tnt.AT4G18450_col_a_m1	AT4G18450	Rice	6219	6235	+	13.6212	8.36e-06	0.0455	GAGGCGGCTGCGCACGT
108	AP2EREBP_tnt.ERF48_col_a_m1	ERF48	Rice	6393	6413	-	13.1429	8.67e-06	0.033	GTCGTCCGTGGCGGCGGCTGC
109	ABI3VP1_tnt.VRN1_col_a_m1	VRN1	Rice	1080	1108	+	-6.86567	8.93e-06	0.0235	AGTATAGTTATTTATTTTTTTTCTCTTCA
110	C2C2gata_tnt.GATA15_col_b_m1	GATA15	Rice	5618	5636	-	10.9718	8.97e-06	0.0341	GATCTTCATGATCTCGATG
111	AP2EREBP_tnt.ERF2_colamp_a_m1	ERF2	Rice	6220	6240	-	13.8636	9.08e-06	0.0482	CGACGACGTGCGCAGCCGCCT
112	C2C2gata_tnt.ZML1_col_a_m1	ZML1	Rice	5020	5034	-	8.78788	9.25e-06	0.0381	TAATCATCGTCTTCT
113	AP2EREBP_tnt.SHN3_col_a_m1	SHN3	Rice	2370	2390	-	11.4789	9.51e-06	0.0305	AGCGCCGCCTCGTACTCCTCC
114	AP2EREBP_tnt.SHN3_col_a_m1	SHN3	Rice	5967	5987	+	11.4507	9.64e-06	0.0305	CGCACCAGCGCCGGCGCCGCG
115	AP2EREBP_tnt.ERF5_col_a_m1	ERF5	Rice	5974	5988	+	13.3788	9.89e-06	0.0489	GCGCCGGCGCCGCGG
116	HMG_tnt.3XHMGBOX1_col_a_m1	3XHMGBOX1	Rice	5700	5720	-	13.6571	9.9e-06	0.0488	GCGGCTGCGGTAGGAGCGGAT
117	AP2EREBP_tnt.ERF105_colamp_a_m1	ERF105	Rice	5935	5958	+	13.4091	1.04e-05	0.0388	ACGACGCTCGCGGCGCTGCCGCCA
118	REM_tnt.REM19_col_a_m1	REM19	Rice	1089	1103	-	13.5821	1.05e-05	0.0421	AGAAAAAAAATAAAT
119	BBRBPC_tnt.BPC1_col_a_m1	BPC1	Rice	1515	1538	-	5.0303	1.05e-05	0.0286	ATGAGATAAAAGATGAGAGAGAAA
120	AP2EREBP_tnt.ERF105_colamp_a_m1	ERF105	Rice	6220	6243	-	13.3636	1.06e-05	0.0388	CGCCGACGACGTGCGCAGCCGCCT
121	AP2EREBP_tnt.SHN3_col_a_m1	SHN3	Rice	6384	6404	+	11.2254	1.07e-05	0.0309	GGAGCGGGCGCAGCCGCCGCC
122	AP2EREBP_tnt.SHN3_col_a_m1	SHN3	Rice	5970	5990	+	11.1127	1.13e-05	0.0316	ACCAGCGCCGGCGCCGCGGTG
123	AP2EREBP_tnt.ERF73_colamp_a_m1	ERF73	Rice	5936	5956	-	12.1053	1.15e-05	0.0472	GCGGCAGCGCCGCGAGCGTCG
124	C2H2_tnt.TF3A_col_a_m1	TF3A	Rice	6210	6228	-	12.632	1.16e-05	0.0426	CAGCCGCCTCGTCCTCCTT
125	AP2EREBP_tnt.AT4G18450_col_a_m1	AT4G18450	Rice	2170	2186	-	12.9545	1.16e-05	0.0498	GCGGCGGCCGCGCGAGG
126	AP2EREBP_tnt.ERF105_colamp_a_m1	ERF105	Rice	5965	5988	+	13.1818	1.17e-05	0.0413	TGCGCACCAGCGCCGGCGCCGCGG
127	LOBAS2_tnt.LOB_col_a_m1	LOB	Rice	5970	5990	+	12.5758	1.21e-05	0.04	ACCAGCGCCGGCGCCGCGGTG
128	REM_tnt.REM19_colamp_a_m1	REM19	Rice	1091	1111	-	11.8209	1.22e-05	0.0296	AATTGAAGAGAAAAAAAATAA
129	mTERF_tnt.AT5G23930_col_a_m1	AT5G23930	Rice	5939	5958	+	12.8333	1.27e-05	0.0434	CGCTCGCGGCGCTGCCGCCA
130	BBRBPC_tnt.BPC1_col_a_m1	BPC1	Rice	2546	2569	-	4.34848	1.33e-05	0.0345	GATTGAGGAAGGAAAGGAGAGGGT
131	BBRBPC_tnt.BPC1_col_a_m1	BPC1	Rice	2266	2289	-	4.27273	1.36e-05	0.0345	GAGGAAGGGCGAGAGGAGGGGGAA
132	C2C2gata_tnt.ZML2_col_a_m1	ZML2	Rice	5021	5039	-	8.1	1.38e-05	0.0343	TATCATAATCATCGTCTTC
133	AP2EREBP_tnt.ERF105_colamp_a_m1	ERF105	Rice	6376	6399	+	12.803	1.44e-05	0.0471	ACGCCGCTGGAGCGGGCGCAGCCG
134	REM_tnt.REM19_colamp_a_m1	REM19	Rice	1087	1107	-	11.4328	1.46e-05	0.0319	GAAGAGAAAAAAAATAAATAA
135	AP2EREBP_tnt.ERF105_colamp_a_m1	ERF105	Rice	5696	5719	+	12.7424	1.48e-05	0.0471	GCTGATCCGCTCCTACCGCAGCCG
136	C2H2_tnt.TF3A_col_a_m1	TF3A	Rice	2368	2386	-	12.144	1.53e-05	0.0458	CCGCCTCGTACTCCTCCTG
137	AP2EREBP_tnt.ESE1_colamp_a_m1	ESE1	Rice	6382	6401	-	11.5429	1.55e-05	0.0479	GGCGGCTGCGCCCGCTCCAG
138	ABI3VP1_tnt.VRN1_col_a_m1	VRN1	Rice	1692	1720	-	-9.40299	1.57e-05	0.0267	AATTTTTTTCTTACAATTTTTCTTGCGAT
139	AP2EREBP_tnt.SHN3_col_a_m1	SHN3	Rice	6209	6229	-	10.3944	1.58e-05	0.0396	GCAGCCGCCTCGTCCTCCTTG
140	AP2EREBP_tnt.ERF105_colamp_a_m1	ERF105	Rice	2384	2407	-	12.6061	1.59e-05	0.0475	CCGTCACCGACGCCTGCAGCGCCG
141	REM_tnt.REM19_colamp_a_m1	REM19	Rice	2566	2586	-	11.2239	1.6e-05	0.0333	GTATTAAAAAAAAAACGGATT
142	LOBAS2_tnt.LOB_col_a_m1	LOB	Rice	6387	6407	+	11.9848	1.67e-05	0.0469	GCGGGCGCAGCCGCCGCCACG
143	ABI3VP1_tnt.VRN1_col_a_m1	VRN1	Rice	1081	1109	+	-9.80597	1.71e-05	0.0271	GTATAGTTATTTATTTTTTTTCTCTTCAA
144	REM_tnt.REM19_colamp_a_m1	REM19	Rice	1090	1110	-	11.0299	1.75e-05	0.0336	ATTGAAGAGAAAAAAAATAAA
145	ABI3VP1_tnt.VRN1_col_a_m1	VRN1	Rice	3758	3786	+	-9.98507	1.78e-05	0.0277	TGATGATAGTTCATGTTTCTTTTTTCATA
146	ABI3VP1_tnt.VRN1_col_a_m1	VRN1	Rice	1079	1107	+	-10.0597	1.81e-05	0.0277	CAGTATAGTTATTTATTTTTTTTCTCTTC
147	C2C2gata_tnt.ZML2_col_a_m1	ZML2	Rice	5024	5042	-	7.17143	1.94e-05	0.0435	TCTTATCATAATCATCGTC
148	REM_tnt.REM19_col_a_m1	REM19	Rice	2982	2996	-	12.4776	1.96e-05	0.0497	GTAAAAAACAAGAAA
149	ABI3VP1_tnt.VRN1_col_a_m1	VRN1	Rice	2980	3008	+	-10.6866	2.07e-05	0.0288	AGTTTCTTGTTTTTTACCCTTTGTTTGGT
150	BBRBPC_tnt.BPC1_col_a_m1	BPC1	Rice	1513	1536	-	2.86364	2.18e-05	0.0464	GAGATAAAAGATGAGAGAGAAAAG
151	AP2EREBP_tnt.SHN3_col_a_m1	SHN3	Rice	2373	2393	-	9.59155	2.27e-05	0.0461	TGCAGCGCCGCCTCGTACTCC
152	ABI3VP1_tnt.VRN1_col_a_m1	VRN1	Rice	1086	1114	+	-11.1343	2.27e-05	0.0303	GTTATTTATTTTTTTTCTCTTCAATTAAC
153	AP2EREBP_tnt.SHN3_col_a_m1	SHN3	Rice	2385	2405	-	8.97183	2.98e-05	0.0484	GTCACCGACGCCTGCAGCGCC
154	REM_tnt.REM19_colamp_a_m1	REM19	Rice	3265	3285	-	9.55224	3.35e-05	0.0471	ATGAACAAAAAAGACATACTC
155	ABI3VP1_tnt.VRN1_col_a_m1	VRN1	Rice	1074	1102	+	-13.194	3.49e-05	0.0369	CCTGGCAGTATAGTTATTTATTTTTTTTC
156	ABI3VP1_tnt.VRN1_col_a_m1	VRN1	Rice	1082	1110	+	-14.7463	4.77e-05	0.041	TATAGTTATTTATTTTTTTTCTCTTCAAT
157	ABI3VP1_tnt.VRN1_col_a_m1	VRN1	Rice	1695	1723	-	-14.8507	4.87e-05	0.041	TTCAATTTTTTTCTTACAATTTTTCTTGC
158	ABI3VP1_tnt.VRN1_col_a_m1	VRN1	Rice	1083	1111	+	-15.6119	5.66e-05	0.042	ATAGTTATTTATTTTTTTTCTCTTCAATT
159	ABI3VP1_tnt.VRN1_col_a_m1	VRN1	Rice	2983	3011	+	-15.7463	5.81e-05	0.0421	TTCTTGTTTTTTACCCTTTGTTTGGTTAC
160	ABI3VP1_tnt.VRN1_col_a_m1	VRN1	Rice	1706	1734	-	-16.0149	6.13e-05	0.0427	TAGCTCATGTTTTCAATTTTTTTCTTACA
161	ABI3VP1_tnt.VRN1_col_a_m1	VRN1	Rice	1651	1679	-	-16.3731	6.57e-05	0.0438	ATTTTAAAATTTCCTTTTGTCTTTCTATA
162	ABI3VP1_tnt.VRN1_col_a_m1	VRN1	Rice	1696	1724	-	-17.1045	7.57e-05	0.0458	TTTCAATTTTTTTCTTACAATTTTTCTTG
163	ABI3VP1_tnt.VRN1_col_a_m1	VRN1	Rice	1597	1625	-	-17.6567	8.41e-05	0.0458	TCGTGTGTTTTTTCAATTTATGTGTTTTA
164	ABI3VP1_tnt.VRN1_col_a_m1	VRN1	Rice	4010	4038	+	-17.791	8.63e-05	0.0458	ATGCTGCTATGTTTTTTCTGTTGAGTTGG
165	ABI3VP1_tnt.VRN1_col_a_m1	VRN1	Rice	880	908	-	-17.8657	8.75e-05	0.0458	TTATATGCTATATTAATTTATTTTGCAAA
166	ABI3VP1_tnt.VRN1_col_a_m1	VRN1	Rice	1652	1680	-	-17.8955	8.8e-05	0.0458	TATTTTAAAATTTCCTTTTGTCTTTCTAT
167	ABI3VP1_tnt.VRN1_col_a_m1	VRN1	Rice	3134	3162	+	-17.9254	8.85e-05	0.0458	TTTTATGTATTCAGGCTCTTGTTTTGGTG
168	C2C2gata_tnt.ZML2_col_a_m1	ZML2	Barley	103	121	-	24.3857	4.41e-09	0.000435	CACCATCAACATCTTCATC
169	C2C2gata_tnt.GATA15_col_b_m1	GATA15	Barley	103	121	-	21.6901	2.79e-08	0.00276	CACCATCAACATCTTCATC
170	C2C2gata_tnt.ZML2_col_a_m1	ZML2	Barley	94	112	-	20.8714	3.81e-08	0.00113	CATCTTCATCAGCACCATC
171	HMG_tnt.3XHMGBOX1_col_a_m1	3XHMGBOX1	Barley	6724	6744	-	17.6857	2.24e-07	0.00578	ATGGCGGAGGTTAAGGGGATG
172	C2C2gata_tnt.GATA15_col_b_m1	GATA15	Barley	94	112	-	18.0986	2.47e-07	0.00364	CATCTTCATCAGCACCATC
173	C2C2gata_tnt.ZML1_col_a_m1	ZML1	Barley	6153	6167	-	16.9545	3.66e-07	0.0109	TCATCATCAGAATCA
174	C2C2gata_tnt.ZML1_col_a_m1	ZML1	Barley	102	116	-	16.4545	4.57e-07	0.0109	TCAACATCTTCATCA
175	C2C2gata_tnt.ZML2_col_a_m1	ZML2	Barley	6154	6172	-	16.0143	4.71e-07	0.00701	CGTCTTCATCATCAGAATC
176	C2C2gata_tnt.ZML2_col_a_m1	ZML2	Barley	144	162	-	15.7286	5.39e-07	0.00701	CATCGTCATCACCAACACT
177	C2C2gata_tnt.ZML1_col_a_m1	ZML1	Barley	6159	6173	-	15.9545	5.57e-07	0.0109	TCGTCTTCATCATCA
178	C2C2gata_tnt.ZML2_col_a_m1	ZML2	Barley	106	124	-	14.9286	7.85e-07	0.0086	CGTCACCATCAACATCTTC
179	C2C2gata_tnt.ZML1_col_a_m1	ZML1	Barley	108	122	-	14.8939	8.1e-07	0.0113	TCACCATCAACATCT
180	MYBrelated_tnt.AT1G72740_col_a_m1	AT1G72740	Barley	74	88	-	17.3714	1.06e-06	0.0282	TCCAAACCCTAGTTC
181	AP2EREBP_tnt.ERF7_col_a_m1	ERF7	Barley	6723	6743	+	16.303	1.4e-06	0.016	CCATCCCCTTAACCTCCGCCA
182	AP2EREBP_tnt.ERF7_col_a_m1	ERF7	Barley	6726	6746	+	16.2576	1.45e-06	0.016	TCCCCTTAACCTCCGCCATCG
183	AP2EREBP_tnt.ERF105_colamp_a_m1	ERF105	Barley	6720	6743	+	16.4545	1.55e-06	0.0102	CCACCATCCCCTTAACCTCCGCCA
184	C2C2gata_tnt.ZML2_col_a_m1	ZML2	Barley	100	118	-	13.4	1.58e-06	0.0105	CATCAACATCTTCATCAGC
185	C2C2gata_tnt.ZML2_col_a_m1	ZML2	Barley	150	168	-	13.3857	1.59e-06	0.0105	CGTCGCCATCGTCATCACC
186	LOBAS2_tnt.LOB_col_a_m1	LOB	Barley	1622	1642	+	15.9394	1.63e-06	0.0343	GCCAGCGCCACTTTCGGCGGC
187	MYBrelated_tnt.AT1G72740_colamp_a_m1	AT1G72740	Barley	67	87	+	16.7576	1.66e-06	0.0378	AAGAGATGAACTAGGGTTTGG
188	C2C2gata_tnt.ZML1_col_a_m1	ZML1	Barley	152	166	-	12.9545	1.86e-06	0.0202	TCGCCATCGTCATCA
189	C2C2gata_tnt.ZML2_col_a_m1	ZML2	Barley	147	165	-	12.8571	2.01e-06	0.0124	CGCCATCGTCATCACCAAC
190	AP2EREBP_tnt.ERF10_col_a_m1	ERF10	Barley	6725	6745	+	16.0152	2.12e-06	0.0211	ATCCCCTTAACCTCCGCCATC
191	C2C2gata_tnt.GATA15_col_b_m1	GATA15	Barley	106	124	-	13.9437	2.21e-06	0.0135	CGTCACCATCAACATCTTC
192	C2C2gata_tnt.ZML1_col_a_m1	ZML1	Barley	1426	1440	-	12.5	2.31e-06	0.0226	TCTTCACCATCATCC
193	C2C2gata_tnt.ZML2_col_a_m1	ZML2	Barley	6157	6175	-	12.3571	2.49e-06	0.013	CCTCGTCTTCATCATCAGA
194	C2C2gata_tnt.GATA15_col_b_m1	GATA15	Barley	6151	6169	-	13.662	2.54e-06	0.0135	CTTCATCATCAGAATCACC
195	AP2EREBP_tnt.CRF4_col_a_m1	CRF4	Barley	4138	4158	+	15.2286	2.59e-06	0.0196	CACACGCCGCCGGCTCCCCCG
196	C2C2gata_tnt.GATA15_col_b_m1	GATA15	Barley	100	118	-	13.6197	2.59e-06	0.0135	CATCAACATCTTCATCAGC
197	C2C2gata_tnt.GATA15_col_b_m1	GATA15	Barley	6154	6172	-	13.5634	2.66e-06	0.0135	CGTCTTCATCATCAGAATC
198	HMG_tnt.3XHMGBOX1_col_a_m1	3XHMGBOX1	Barley	1667	1687	+	15.2143	2.68e-06	0.0237	GCGGTGGTGGCAGGGCCCGCG
199	AP2EREBP_tnt.ERF5_colamp_a_m1	ERF5	Barley	4138	4158	+	15.7273	2.69e-06	0.0266	CACACGCCGCCGGCTCCCCCG
200	C2C2gata_tnt.GATA15_col_b_m1	GATA15	Barley	97	115	-	13.3662	2.93e-06	0.0135	CAACATCTTCATCAGCACC
201	C2C2gata_tnt.GATA15_col_b_m1	GATA15	Barley	6148	6166	-	13.3099	3.01e-06	0.0135	CATCATCAGAATCACCTTT
202	AP2EREBP_tnt.ERF104_colamp_a_m1	ERF104	Barley	2094	2108	-	15.6571	3.07e-06	0.0275	TTGCGGCGGCCGCGC
203	C2C2gata_tnt.ZML1_col_a_m1	ZML1	Barley	105	119	-	11.6818	3.33e-06	0.0265	CCATCAACATCTTCA
204	AP2EREBP_tnt.ERF2_col_a_m1	ERF2	Barley	6726	6746	+	15.2121	3.49e-06	0.0247	TCCCCTTAACCTCCGCCATCG
205	C2C2gata_tnt.ZML2_col_a_m1	ZML2	Barley	153	171	-	11.2286	3.99e-06	0.0171	AATCGTCGCCATCGTCATC
206	ABI3VP1_tnt.VRN1_col_a_m1	VRN1	Barley	5392	5420	-	-3.43284	4.01e-06	0.0166	AATGGATGTATTGTTTCTGTTTTTCTGGC
207	BBRBPC_tnt.BPC5_colamp_a_m1	BPC5	Barley	4870	4898	-	6.29268	4.06e-06	0.0277	TCAAGAGAAATTTATAGGAAGAGAGAAAC
208	BBRBPC_tnt.BPC1_col_a_m1	BPC1	Barley	4871	4894	-	7.57576	4.26e-06	0.018	GAGAAATTTATAGGAAGAGAGAAA
209	AP2EREBP_tnt.ERF5_colamp_a_m1	ERF5	Barley	2094	2114	+	14.9697	4.27e-06	0.0352	GCGCGGCCGCCGCAACAATGG
210	REM_tnt.REM19_col_a_m1	REM19	Barley	5910	5924	-	15.0299	4.28e-06	0.0216	CCAAAAAACAAAACA
211	AP2EREBP_tnt.ERF48_col_a_m1	ERF48	Barley	6719	6739	-	14.3714	4.31e-06	0.0289	GGAGGTTAAGGGGATGGTGGG
212	AP2EREBP_tnt.ESE1_colamp_a_m1	ESE1	Barley	6726	6745	-	14.2429	4.32e-06	0.0225	GATGGCGGAGGTTAAGGGGA
213	AP2EREBP_tnt.ERF104_col_a_m1	ERF104	Barley	6727	6745	+	14.803	4.55e-06	0.0257	CCCCTTAACCTCCGCCATC
214	C2C2gata_tnt.ZML1_col_a_m1	ZML1	Barley	146	160	-	10.8636	4.56e-06	0.0265	TCGTCATCACCAACA
215	BBRBPC_tnt.BPC5_col_a_m1	BPC5	Barley	4947	4976	+	-31.3158	4.59e-06	0.0297	AGAAAGAGCTAGAAGCACAAAGAGAATTAG
216	C2C2gata_tnt.ZML1_col_a_m1	ZML1	Barley	149	163	-	10.8333	4.61e-06	0.0265	CCATCGTCATCACCA
217	AP2EREBP_tnt.CRF4_col_a_m1	CRF4	Barley	6732	6752	+	14.2143	4.63e-06	0.0268	TAACCTCCGCCATCGTCACGA
218	mTERF_tnt.AT5G23930_col_a_m1	AT5G23930	Barley	6724	6743	+	14.5152	4.74e-06	0.0276	CATCCCCTTAACCTCCGCCA
219	C2H2_tnt.TF3A_col_a_m1	TF3A	Barley	2259	2277	-	13.912	5.42e-06	0.0295	CCCCCTCAAACTCCTCCTG
220	C2H2_tnt.TF3A_col_a_m1	TF3A	Barley	4408	4426	+	13.872	5.56e-06	0.0295	CCTACTCTTTCTATTCCTC
221	BBRBPC_tnt.BPC5_colamp_a_m1	BPC5	Barley	4412	4440	-	5.29268	5.57e-06	0.0283	AGTACCTGAACAAGGAGGAATAGAAAGAG
222	BBRBPC_tnt.BPC1_col_a_m1	BPC1	Barley	4873	4896	-	6.74242	5.76e-06	0.0211	AAGAGAAATTTATAGGAAGAGAGA
223	HMG_tnt.3XHMGBOX1_col_a_m1	3XHMGBOX1	Barley	6721	6741	-	14.3	5.89e-06	0.0338	GCGGAGGTTAAGGGGATGGTG
224	C2C2gata_tnt.ZML1_col_a_m1	ZML1	Barley	96	110	-	10	6.15e-06	0.0324	TCTTCATCAGCACCA
225	C2C2gata_tnt.ZML2_col_a_m1	ZML2	Barley	6151	6169	-	10.1286	6.25e-06	0.0233	CTTCATCATCAGAATCACC
226	C2C2gata_tnt.ZML2_col_a_m1	ZML2	Barley	109	127	-	10.0714	6.39e-06	0.0233	ACTCGTCACCATCAACATC
227	AP2EREBP_tnt.ERF2_col_a_m1	ERF2	Barley	6729	6749	+	14.197	6.52e-06	0.034	CCTTAACCTCCGCCATCGTCA
228	AP2EREBP_tnt.SHN3_col_a_m1	SHN3	Barley	1471	1491	-	12.2113	6.69e-06	0.0305	TTTTCCGCCTACACATCCGCC
229	AP2EREBP_tnt.ERF73_col_a_m1	ERF73	Barley	2094	2114	+	13.9697	6.84e-06	0.0483	GCGCGGCCGCCGCAACAATGG
230	REM_tnt.REM19_colamp_a_m1	REM19	Barley	5908	5928	-	12.8806	7.34e-06	0.0249	ACCTCCAAAAAACAAAACATG
231	C2C2gata_tnt.ZML2_col_a_m1	ZML2	Barley	6160	6178	-	9.71429	7.38e-06	0.026	AGTCCTCGTCTTCATCATC
232	AP2EREBP_tnt.ERF48_col_a_m1	ERF48	Barley	4551	4571	+	13.3714	7.64e-06	0.0315	GGCCGTGGAAGGAGTGGTGGA
233	AP2EREBP_tnt.ERF73_colamp_a_m1	ERF73	Barley	2089	2109	-	12.9737	7.64e-06	0.036	GTTGCGGCGGCCGCGCGAGGT
234	AP2EREBP_tnt.ERF5_col_a_m1	ERF5	Barley	6735	6749	+	13.697	8.2e-06	0.0477	CCTCCGCCATCGTCA
235	mTERF_tnt.AT5G23930_col_a_m1	AT5G23930	Barley	6727	6746	+	13.5909	8.26e-06	0.0388	CCCCTTAACCTCCGCCATCG
236	C2C2gata_tnt.ZML1_col_a_m1	ZML1	Barley	111	125	-	9.06061	8.41e-06	0.0374	TCGTCACCATCAACA
237	C2C2gata_tnt.GATA15_col_b_m1	GATA15	Barley	147	165	-	11.0986	8.47e-06	0.0335	CGCCATCGTCATCACCAAC
238	AP2EREBP_tnt.ERF5_col_a_m1	ERF5	Barley	6732	6746	+	13.5455	8.99e-06	0.0489	TAACCTCCGCCATCG
239	AP2EREBP_tnt.ESE1_colamp_a_m1	ESE1	Barley	2071	2090	-	12.7143	9.14e-06	0.0386	GTCGACGGCGCTTGTCGAGG
240	C2C2gata_tnt.ZML2_col_a_m1	ZML2	Barley	97	115	-	9.15714	9.19e-06	0.0312	CAACATCTTCATCAGCACC
241	AP2EREBP_tnt.ESE1_colamp_a_m1	ESE1	Barley	6729	6748	-	12.6571	9.39e-06	0.0386	GACGATGGCGGAGGTTAAGG
242	AP2EREBP_tnt.ERF104_col_a_m1	ERF104	Barley	6730	6748	+	13.5	9.73e-06	0.0414	CTTAACCTCCGCCATCGTC
243	AP2EREBP_tnt.ERF7_col_a_m1	ERF7	Barley	6729	6749	+	13.5	9.75e-06	0.0439	CCTTAACCTCCGCCATCGTCA
244	C2C2gata_tnt.GATA15_col_b_m1	GATA15	Barley	144	162	-	10.7465	9.92e-06	0.0363	CATCGTCATCACCAACACT
245	LOBAS2_tnt.LOB_col_a_m1	LOB	Barley	4143	4163	+	12.8939	1.01e-05	0.04	GCCGCCGGCTCCCCCGCGTAC
246	ABI3VP1_tnt.VRN1_col_a_m1	VRN1	Barley	629	657	-	-7.50746	1.03e-05	0.0238	TTTATGTTGATATTTATCGTTTTATGGGC
247	AP2EREBP_tnt.SHN3_col_a_m1	SHN3	Barley	6725	6745	+	11.2394	1.07e-05	0.0309	ATCCCCTTAACCTCCGCCATC
248	AP2EREBP_tnt.AT4G18450_col_a_m1	AT4G18450	Barley	2090	2106	-	12.9545	1.16e-05	0.0498	GCGGCGGCCGCGCGAGG
249	AP2EREBP_tnt.ERF48_col_a_m1	ERF48	Barley	147	167	+	12.6	1.16e-05	0.0411	GTTGGTGATGACGATGGCGAC
250	C2C2gata_tnt.ZML2_col_a_m1	ZML2	Barley	6163	6181	-	8.51429	1.18e-05	0.0343	CATAGTCCTCGTCTTCATC
251	LOBAS2_tnt.LOB_col_a_m1	LOB	Barley	6725	6745	+	12.4091	1.32e-05	0.0402	ATCCCCTTAACCTCCGCCATC
252	AP2EREBP_tnt.CRF4_col_a_m1	CRF4	Barley	1659	1679	-	12.1714	1.36e-05	0.0478	CTGCCACCACCGCGTCACGCG
253	LOBAS2_tnt.LOB_col_a_m1	LOB	Barley	1468	1488	-	12.2576	1.44e-05	0.0417	TCCGCCTACACATCCGCCCGA
254	mTERF_tnt.AT5G23930_col_a_m1	AT5G23930	Barley	2069	2088	+	12.5758	1.47e-05	0.0478	ACCCTCGACAAGCGCCGTCG
255	AP2EREBP_tnt.ERF105_colamp_a_m1	ERF105	Barley	6723	6746	+	12.6515	1.55e-05	0.0475	CCATCCCCTTAACCTCCGCCATCG
256	C2H2_tnt.TF3A_col_a_m1	TF3A	Barley	4411	4429	+	12.056	1.61e-05	0.0467	ACTCTTTCTATTCCTCCTT
257	AP2EREBP_tnt.ERF105_colamp_a_m1	ERF105	Barley	2065	2088	+	12.5455	1.64e-05	0.0476	CAAAACCCTCGACAAGCGCCGTCG
258	mTERF_tnt.AT5G23930_col_a_m1	AT5G23930	Barley	1668	1687	-	12.3182	1.69e-05	0.0492	CGCGGGCCCTGCCACCACCG
259	LOBAS2_tnt.LOB_col_a_m1	LOB	Barley	2282	2302	-	11.8788	1.77e-05	0.0469	TACACCGTCAGCGACGCCAGC
260	AP2EREBP_tnt.ERF105_colamp_a_m1	ERF105	Barley	4126	4149	+	12.3636	1.8e-05	0.0485	TCCGGGTGCCGGCACACGCCGCCG
261	LOBAS2_tnt.LOB_col_a_m1	LOB	Barley	1471	1491	-	11.7879	1.85e-05	0.0469	TTTTCCGCCTACACATCCGCC
262	REM_tnt.REM19_col_a_m1	REM19	Barley	4819	4833	-	12.5224	1.91e-05	0.0497	GAAAAATACAAATAA
263	ABI3VP1_tnt.VRN1_col_a_m1	VRN1	Barley	5898	5926	+	-10.3582	1.93e-05	0.0281	TCCTTATATCCATGTTTTGTTTTTTGGAG
264	BBRBPC_tnt.BPC1_col_a_m1	BPC1	Barley	4405	4428	-	3.18182	1.96e-05	0.0445	AGGAGGAATAGAAAGAGTAGGGCA
265	AP2EREBP_tnt.SHN3_col_a_m1	SHN3	Barley	147	167	-	9.76056	2.1e-05	0.0461	GTCGCCATCGTCATCACCAAC
266	ABI3VP1_tnt.VRN1_col_a_m1	VRN1	Barley	5897	5925	+	-10.9104	2.17e-05	0.0298	ATCCTTATATCCATGTTTTGTTTTTTGGA
267	AP2EREBP_tnt.SHN3_col_a_m1	SHN3	Barley	6722	6742	+	9.50704	2.35e-05	0.0461	ACCATCCCCTTAACCTCCGCC
268	ABI3VP1_tnt.VRN1_col_a_m1	VRN1	Barley	1092	1120	+	-11.403	2.4e-05	0.0316	TATAAAGCTTGTATGTTTTTATTTGTGTC
269	AP2EREBP_tnt.SHN3_col_a_m1	SHN3	Barley	1663	1683	-	9.43662	2.43e-05	0.0466	GGCCCTGCCACCACCGCGTCA
270	ABI3VP1_tnt.VRN1_col_a_m1	VRN1	Barley	4812	4840	+	-11.6418	2.53e-05	0.0326	TAGATGCTTATTTGTATTTTTCTTATAGG
271	AP2EREBP_tnt.SHN3_col_a_m1	SHN3	Barley	6731	6751	+	9.26761	2.62e-05	0.0481	TTAACCTCCGCCATCGTCACG
272	AP2EREBP_tnt.SHN3_col_a_m1	SHN3	Barley	2273	2293	-	8.94366	3.02e-05	0.0484	AGCGACGCCAGCAGCGCCCCC
273	ABI3VP1_tnt.VRN1_col_a_m1	VRN1	Barley	5393	5421	-	-16.5821	6.84e-05	0.0447	CAATGGATGTATTGTTTCTGTTTTTCTGG
274	ABI3VP1_tnt.VRN1_col_a_m1	VRN1	Barley	4809	4837	+	-16.7164	7.02e-05	0.0449	TTTTAGATGCTTATTTGTATTTTTCTTAT
275	ABI3VP1_tnt.VRN1_col_a_m1	VRN1	Barley	1515	1543	-	-17.194	7.7e-05	0.0458	TCAGCTGTGTTCACGCCTTTTTTTCTAAT
276	ABI3VP1_tnt.VRN1_col_a_m1	VRN1	Barley	578	606	-	-17.4328	8.06e-05	0.0458	ATACTTATGATTTTTCTCTCTTATTTTGC
277	ABI3VP1_tnt.VRN1_col_a_m1	VRN1	Barley	577	605	-	-17.7015	8.49e-05	0.0458	TACTTATGATTTTTCTCTCTTATTTTGCA
278	ABI3VP1_tnt.VRN1_col_a_m1	VRN1	Barley	1436	1464	+	-17.791	8.63e-05	0.0458	GAAGAGTGTTTCAGTACCTTTCTTTTATA
279	AP2EREBP_tnt.ERF48_col_a_m1	ERF48	Brachypodium	4958	4978	-	26.0857	2.55e-10	2.52e-05	GGTGGTGGTGGTGGTGGTGGG
280	HMG_tnt.3XHMGBOX1_colamp_a_m1	3XHMGBOX1	Brachypodium	4961	4975	+	23.0606	5.29e-10	2.61e-05	ACCACCACCACCACC
281	HMG_tnt.3XHMGBOX1_colamp_a_m1	3XHMGBOX1	Brachypodium	4964	4978	+	23.0606	5.29e-10	2.61e-05	ACCACCACCACCACC
282	AP2EREBP_tnt.SHN3_col_a_m1	SHN3	Brachypodium	4958	4978	+	24.5634	3.63e-09	0.000355	CCCACCACCACCACCACCACC
283	AP2EREBP_tnt.ERF48_col_a_m1	ERF48	Brachypodium	4961	4981	-	23.2	5.67e-09	0.00028	GAGGGTGGTGGTGGTGGTGGT
284	HMG_tnt.3XHMGBOX1_colamp_a_m1	3XHMGBOX1	Brachypodium	4958	4972	+	21.7424	6.12e-09	0.000202	CCCACCACCACCACC
285	C2H2_tnt.TF3A_col_a_m1	TF3A	Brachypodium	1293	1311	-	22.952	7.34e-09	0.000703	TCTTCTTCTCCTCCTCCTC
286	C2C2gata_tnt.ZML1_col_a_m1	ZML1	Brachypodium	7648	7662	-	22.6061	2.15e-08	0.0021	TCATCTTCATCATCA
287	AP2EREBP_tnt.SHN3_col_a_m1	SHN3	Brachypodium	4955	4975	+	21.9296	2.46e-08	0.00121	CCCCCCACCACCACCACCACC
288	C2C2gata_tnt.ZML2_col_a_m1	ZML2	Brachypodium	7643	7661	-	20.6857	4.19e-08	0.00113	CATCTTCATCATCAGAATC
289	C2C2gata_tnt.ZML2_col_a_m1	ZML2	Brachypodium	7649	7667	-	20.5143	4.6e-08	0.00113	AATCGTCATCTTCATCATC
290	AP2EREBP_tnt.SHN3_col_a_m1	SHN3	Brachypodium	4961	4981	+	20.7465	5.46e-08	0.00178	ACCACCACCACCACCACCCTC
291	C2C2gata_tnt.GATA15_col_b_m1	GATA15	Brachypodium	7643	7661	-	19.2958	1.24e-07	0.00364	CATCTTCATCATCAGAATC
292	HMG_tnt.3XHMGBOX1_col_a_m1	3XHMGBOX1	Brachypodium	4954	4974	-	17.9571	1.64e-07	0.00578	GTGGTGGTGGTGGTGGGGGGG
293	BBRBPC_tnt.BPC1_colamp_a_m1	BPC1	Brachypodium	1975	1989	-	19.4394	1.72e-07	0.00823	ATCTCTCTCTTTCTT
294	HMG_tnt.3XHMGBOX1_col_a_m1	3XHMGBOX1	Brachypodium	4951	4971	-	17.9143	1.73e-07	0.00578	GTGGTGGTGGTGGGGGGGGGG
295	AP2EREBP_tnt.ERF104_colamp_a_m1	ERF104	Brachypodium	4912	4926	-	19.1714	1.86e-07	0.00547	TGGCGGCGGCGCAGC
296	C2H2_tnt.TF3A_col_a_m1	TF3A	Brachypodium	1296	1314	-	18.904	1.91e-07	0.00917	CTCTCTTCTTCTCCTCCTC
297	AP2EREBP_tnt.ERF7_col_a_m1	ERF7	Brachypodium	4956	4976	+	18.5909	2.2e-07	0.00827	CCCCCACCACCACCACCACCA
298	C2C2gata_tnt.GATA15_col_b_m1	GATA15	Brachypodium	7652	7670	-	18.2958	2.21e-07	0.00364	CATAATCGTCATCTTCATC
299	AP2EREBP_tnt.CRF4_colamp_a_m1	CRF4	Brachypodium	4912	4926	-	19.0303	2.24e-07	0.0111	TGGCGGCGGCGCAGC
300	HMG_tnt.3XHMGBOX1_col_a_m1	3XHMGBOX1	Brachypodium	4957	4977	-	17.6429	2.35e-07	0.00578	GTGGTGGTGGTGGTGGTGGGG
301	AP2EREBP_tnt.CRF4_col_a_m1	CRF4	Brachypodium	4959	4979	+	18.8571	2.44e-07	0.00801	CCACCACCACCACCACCACCC
302	AP2EREBP_tnt.ERF7_col_a_m1	ERF7	Brachypodium	4953	4973	+	18.4394	2.51e-07	0.00827	CCCCCCCCACCACCACCACCA
303	AP2EREBP_tnt.ERF105_col_m1	ERF105	Brachypodium	4913	4927	-	18.7727	2.96e-07	0.00978	CTGGCGGCGGCGCAG
304	AP2EREBP_tnt.SHN3_col_a_m1	SHN3	Brachypodium	4952	4972	+	17.9718	3.06e-07	0.00534	CCCCCCCCCACCACCACCACC
305	HMG_tnt.3XHMGBOX1_colamp_a_m1	3XHMGBOX1	Brachypodium	1388	1402	-	18.1061	3.16e-07	0.00781	TCCACCACCTGCACC
306	C2C2gata_tnt.GATA15_col_b_m1	GATA15	Brachypodium	2384	2402	-	17.5634	3.32e-07	0.00364	CATGATGATCTTCTTGATC
307	AP2EREBP_tnt.ERF48_col_a_m1	ERF48	Brachypodium	4964	4984	-	18.1857	3.65e-07	0.00977	CGCGAGGGTGGTGGTGGTGGT
308	C2C2gata_tnt.ZML1_col_a_m1	ZML1	Brachypodium	7642	7656	-	16.9545	3.66e-07	0.0109	TCATCATCAGAATCA
309	AP2EREBP_tnt.ERF5_col_a_m1	ERF5	Brachypodium	4912	4926	+	18.197	3.81e-07	0.0159	GCTGCGCCGCCGCCA
310	AP2EREBP_tnt.ERF105_colamp_a_m1	ERF105	Brachypodium	4903	4926	+	18.197	4.06e-07	0.00534	GCGAGGCTCGCTGCGCCGCCGCCA
311	AP2EREBP_tnt.ESE1_col_a_m1	ESE1	Brachypodium	4912	4926	-	18.2424	4.21e-07	0.0111	TGGCGGCGGCGCAGC
312	C2C2gata_tnt.GATA15_col_b_m1	GATA15	Brachypodium	7649	7667	-	16.9577	4.64e-07	0.00458	AATCGTCATCTTCATCATC
313	AP2EREBP_tnt.CRF4_col_a_m1	CRF4	Brachypodium	4956	4976	+	17.6571	5.63e-07	0.00924	CCCCCACCACCACCACCACCA
314	C2C2gata_tnt.ZML2_col_a_m1	ZML2	Brachypodium	7646	7664	-	15.6143	5.69e-07	0.00701	CGTCATCTTCATCATCAGA
315	AP2EREBP_tnt.ERF7_col_a_m1	ERF7	Brachypodium	4950	4970	+	17.2576	6.69e-07	0.0133	CCCCCCCCCCCACCACCACCA
316	mTERF_tnt.AT5G23930_col_a_m1	AT5G23930	Brachypodium	4957	4976	+	17.3636	7.01e-07	0.0136	CCCCACCACCACCACCACCA
317	C2C2gata_tnt.ZML1_col_a_m1	ZML1	Brachypodium	7651	7665	-	15.2424	7.22e-07	0.0113	TCGTCATCTTCATCA
318	AP2EREBP_tnt.ERF2_colamp_a_m1	ERF2	Brachypodium	4906	4926	+	17.3636	8.03e-07	0.0133	AGGCTCGCTGCGCCGCCGCCA
319	AP2EREBP_tnt.AT4G18450_col_a_m1	AT4G18450	Brachypodium	4908	4924	-	17.2273	9.82e-07	0.0146	GCGGCGGCGCAGCGAGC
320	BBRBPC_tnt.BPC5_colamp_a_m1	BPC5	Brachypodium	2021	2049	+	10.4512	1.01e-06	0.012	GCGTGGTTGTTCGTGAGAGAAAAAAAGAG
321	AP2EREBP_tnt.ERF2_col_a_m1	ERF2	Brachypodium	4906	4926	+	16.9091	1.08e-06	0.0173	AGGCTCGCTGCGCCGCCGCCA
322	AP2EREBP_tnt.ERF48_col_a_m1	ERF48	Brachypodium	1385	1405	+	16.5286	1.13e-06	0.0187	AGAGGTGCAGGTGGTGGATGC
323	AP2EREBP_tnt.ERF73_colamp_a_m1	ERF73	Brachypodium	4904	4924	-	16.5526	1.15e-06	0.0114	GCGGCGGCGCAGCGAGCCTCG
324	REM_tnt.REM19_colamp_a_m1	REM19	Brachypodium	4393	4413	+	16.3881	1.15e-06	0.0129	ATGACAAAAAGAAATAACAAA
325	BBRBPC_tnt.BPC5_colamp_a_m1	BPC5	Brachypodium	2025	2053	+	10.0366	1.16e-06	0.0123	GGTTGTTCGTGAGAGAAAAAAAGAGAGCG
326	AP2EREBP_tnt.ERF2_col_a_m1	ERF2	Brachypodium	4956	4976	+	16.7879	1.18e-06	0.0173	CCCCCACCACCACCACCACCA
327	BBRBPC_tnt.BPC1_col_a_m1	BPC1	Brachypodium	1294	1317	+	10.8333	1.23e-06	0.0124	AGGAGGAGGAGAAGAAGAGAGGAA
328	BBRBPC_tnt.BPC1_colamp_a_m1	BPC1	Brachypodium	1374	1388	-	15.803	1.32e-06	0.0297	CTCTCTTTCTCTCCA
329	mTERF_tnt.AT5G23930_col_a_m1	AT5G23930	Brachypodium	4954	4973	+	16.4697	1.32e-06	0.0145	CCCCCCCACCACCACCACCA
330	AP2EREBP_tnt.ERF104_col_a_m1	ERF104	Brachypodium	4907	4925	+	16.6212	1.37e-06	0.0155	GGCTCGCTGCGCCGCCGCC
331	C2H2_tnt.TF3A_col_a_m1	TF3A	Brachypodium	1290	1308	-	16.08	1.38e-06	0.0295	TCTTCTCCTCCTCCTCAGT
332	AP2EREBP_tnt.ERF5_colamp_a_m1	ERF5	Brachypodium	4912	4932	+	16.7273	1.39e-06	0.0196	GCTGCGCCGCCGCCAGTCGTG
333	AP2EREBP_tnt.ERF105_colamp_a_m1	ERF105	Brachypodium	4900	4923	+	16.6061	1.39e-06	0.00979	TCCGCGAGGCTCGCTGCGCCGCCG
334	AP2EREBP_tnt.CRF4_col_a_m1	CRF4	Brachypodium	4962	4982	+	16.2286	1.42e-06	0.0171	CCACCACCACCACCACCCTCG
335	C2C2gata_tnt.ZML2_col_a_m1	ZML2	Brachypodium	7652	7670	-	13.6143	1.44e-06	0.0105	CATAATCGTCATCTTCATC
336	BBRBPC_tnt.BPC1_col_a_m1	BPC1	Brachypodium	2033	2056	+	10.3939	1.47e-06	0.0124	GTGAGAGAAAAAAAGAGAGCGCAC
337	ABI3VP1_tnt.VRN1_col_a_m1	VRN1	Brachypodium	31	59	+	0.313433	1.58e-06	0.0144	TCTCAATGTTTATATTCTTTTTTTCCTTT
338	C2C2gata_tnt.GATA15_col_b_m1	GATA15	Brachypodium	7655	7673	-	14.5634	1.62e-06	0.0115	TATCATAATCGTCATCTTC
339	mTERF_tnt.AT5G23930_col_a_m1	AT5G23930	Brachypodium	8415	8434	+	16.1667	1.63e-06	0.0146	ATCCGCGACCATCGCCTCCG
340	ABI3VP1_tnt.VRN1_col_a_m1	VRN1	Brachypodium	38	66	+	0.134328	1.66e-06	0.0144	GTTTATATTCTTTTTTTCCTTTTTAGTTC
341	ABI3VP1_tnt.VRN1_col_a_m1	VRN1	Brachypodium	35	63	+	0.0746269	1.68e-06	0.0144	AATGTTTATATTCTTTTTTTCCTTTTTAG
342	ABI3VP1_tnt.VRN1_col_a_m1	VRN1	Brachypodium	372	400	+	0.0298507	1.7e-06	0.0144	GTGTTTTTGATTATTTTCTGTTTACTGTT
343	C2C2gata_tnt.ZML1_col_a_m1	ZML1	Brachypodium	7657	7671	-	13.1061	1.74e-06	0.0202	TCATAATCGTCATCT
344	AP2EREBP_tnt.ERF10_col_a_m1	ERF10	Brachypodium	4958	4978	+	16.2727	1.77e-06	0.0211	CCCACCACCACCACCACCACC
345	AP2EREBP_tnt.ERF2_colamp_a_m1	ERF2	Brachypodium	4903	4923	+	16.2879	1.88e-06	0.0169	GCGAGGCTCGCTGCGCCGCCG
346	AP2EREBP_tnt.ERF2_col_a_m1	ERF2	Brachypodium	4953	4973	+	16.1061	1.92e-06	0.0238	CCCCCCCCACCACCACCACCA
347	ABI3VP1_tnt.VRN1_col_a_m1	VRN1	Brachypodium	6783	6811	+	-0.447761	1.92e-06	0.0144	TTTTGATTGTTCTTTCTTTTCTTTTCGAG
348	HMG_tnt.3XHMGBOX1_col_a_m1	3XHMGBOX1	Brachypodium	8415	8435	-	15.5143	2.04e-06	0.0226	CCGGAGGCGATGGTCGCGGAT
349	AP2EREBP_tnt.ERF104_col_a_m1	ERF104	Brachypodium	4960	4978	+	16.0303	2.06e-06	0.0174	CACCACCACCACCACCACC
350	HMG_tnt.3XHMGBOX1_col_a_m1	3XHMGBOX1	Brachypodium	4948	4968	-	15.5	2.06e-06	0.0226	GTGGTGGTGGGGGGGGGGGGG
351	BBRBPC_tnt.BPC1_colamp_a_m1	BPC1	Brachypodium	1376	1390	-	14.8788	2.11e-06	0.0297	ACCTCTCTTTCTCTC
352	C2H2_tnt.TF3A_col_a_m1	TF3A	Brachypodium	4953	4971	+	15.416	2.12e-06	0.0295	CCCCCCCCACCACCACCAC
353	AP2EREBP_tnt.ERF7_col_a_m1	ERF7	Brachypodium	4959	4979	+	15.7273	2.15e-06	0.0198	CCACCACCACCACCACCACCC
354	BBRBPC_tnt.BPC1_colamp_a_m1	BPC1	Brachypodium	1973	1987	-	14.8333	2.17e-06	0.0297	CTCTCTCTTTCTTTT
355	AP2EREBP_tnt.ERF5_col_a_m1	ERF5	Brachypodium	4959	4973	+	15.7879	2.19e-06	0.0271	CCACCACCACCACCA
356	AP2EREBP_tnt.ERF5_col_a_m1	ERF5	Brachypodium	4962	4976	+	15.7879	2.19e-06	0.0271	CCACCACCACCACCA
357	BBRBPC_tnt.BPC5_colamp_a_m1	BPC5	Brachypodium	1288	1316	+	8.18293	2.19e-06	0.019	GAACTGAGGAGGAGGAGAAGAAGAGAGGA
358	AP2EREBP_tnt.ERF7_col_a_m1	ERF7	Brachypodium	4906	4926	+	15.697	2.2e-06	0.0198	AGGCTCGCTGCGCCGCCGCCA
359	AP2EREBP_tnt.ERF73_colamp_a_m1	ERF73	Brachypodium	4907	4927	-	15.2895	2.35e-06	0.0211	CTGGCGGCGGCGCAGCGAGCC
360	ABI3VP1_tnt.VRN1_col_a_m1	VRN1	Brachypodium	1081	1109	-	-1.25373	2.35e-06	0.0144	TAGTGTTTATTTGTTACTTGTTTGTTGTA
361	AP2EREBP_tnt.AT4G18450_col_a_m1	AT4G18450	Brachypodium	4911	4927	-	15.8636	2.4e-06	0.0218	CTGGCGGCGGCGCAGCG
362	AP2EREBP_tnt.ERF73_col_a_m1	ERF73	Brachypodium	4912	4932	+	15.7879	2.42e-06	0.0478	GCTGCGCCGCCGCCAGTCGTG
363	AP2EREBP_tnt.ESE1_colamp_a_m1	ESE1	Brachypodium	4909	4928	-	15.2714	2.5e-06	0.0205	ACTGGCGGCGGCGCAGCGAG
364	AP2EREBP_tnt.ERF10_col_a_m1	ERF10	Brachypodium	4905	4925	+	15.7576	2.54e-06	0.0211	GAGGCTCGCTGCGCCGCCGCC
365	C2C2gata_tnt.GATA15_col_b_m1	GATA15	Brachypodium	7640	7658	-	13.662	2.54e-06	0.0135	CTTCATCATCAGAATCACC
366	AP2EREBP_tnt.ERF104_col_a_m1	ERF104	Brachypodium	4957	4975	+	15.6515	2.66e-06	0.0199	CCCCACCACCACCACCACC
367	AP2EREBP_tnt.ERF48_col_a_m1	ERF48	Brachypodium	8512	8532	+	15.1429	2.72e-06	0.0283	GGATGCGGATGCAGCGGCTGT
368	AP2EREBP_tnt.ERF10_col_a_m1	ERF10	Brachypodium	4908	4928	+	15.6212	2.79e-06	0.0211	GCTCGCTGCGCCGCCGCCAGT
369	C2H2_tnt.TF3A_col_a_m1	TF3A	Brachypodium	4950	4968	+	14.984	2.79e-06	0.0295	CCCCCCCCCCCACCACCAC
370	LOBAS2_tnt.LOB_col_a_m1	LOB	Brachypodium	8512	8532	-	15.0152	2.91e-06	0.0343	ACAGCCGCTGCATCCGCATCC
371	AP2EREBP_tnt.ESE1_colamp_a_m1	ESE1	Brachypodium	4959	4978	-	14.9857	2.92e-06	0.0205	GGTGGTGGTGGTGGTGGTGG
372	AP2EREBP_tnt.ERF10_col_a_m1	ERF10	Brachypodium	4955	4975	+	15.5455	2.93e-06	0.0211	CCCCCCACCACCACCACCACC
373	C2C2gata_tnt.GATA15_col_b_m1	GATA15	Brachypodium	7637	7655	-	13.3099	3.01e-06	0.0135	CATCATCAGAATCACCTTT
374	AP2EREBP_tnt.ERF48_col_a_m1	ERF48	Brachypodium	4967	4987	-	14.9714	3.02e-06	0.0283	AGACGCGAGGGTGGTGGTGGT
375	MYBrelated_tnt.AT1G72740_colamp_a_m1	AT1G72740	Brachypodium	5004	5024	+	15.9697	3.02e-06	0.0421	AGGCGTGTATCTAGGGTTTTT
376	C2H2_tnt.TF3A_col_a_m1	TF3A	Brachypodium	4956	4974	+	14.84	3.06e-06	0.0295	CCCCCACCACCACCACCAC
377	AP2EREBP_tnt.ERF104_colamp_a_m1	ERF104	Brachypodium	2109	2123	-	15.6571	3.07e-06	0.0275	TTGCGGCGGCCGCGC
378	AP2EREBP_tnt.ERF7_colamp_a_m1	ERF7	Brachypodium	4907	4927	-	15.7121	3.09e-06	0.0333	CTGGCGGCGGCGCAGCGAGCC
379	AP2EREBP_tnt.ESE1_colamp_a_m1	ESE1	Brachypodium	4956	4975	-	14.8714	3.11e-06	0.0205	GGTGGTGGTGGTGGTGGGGG
380	AP2EREBP_tnt.ERF73_col_a_m1	ERF73	Brachypodium	4909	4929	+	15.3485	3.15e-06	0.0483	CTCGCTGCGCCGCCGCCAGTC
381	ABI3VP1_tnt.VRN1_col_a_m1	VRN1	Brachypodium	6781	6809	+	-2.52239	3.22e-06	0.0161	GATTTTGATTGTTCTTTCTTTTCTTTTCG
382	AP2EREBP_tnt.SHN3_col_a_m1	SHN3	Brachypodium	4778	4798	+	13.662	3.25e-06	0.0229	TCAACCTTCGCCTCCGCGACA
383	AP2EREBP_tnt.SHN3_col_a_m1	SHN3	Brachypodium	4949	4969	+	13.6479	3.28e-06	0.0229	CCCCCCCCCCCCACCACCACC
384	AP2EREBP_tnt.ESE1_colamp_a_m1	ESE1	Brachypodium	4906	4925	-	14.7286	3.35e-06	0.0207	GGCGGCGGCGCAGCGAGCCT
385	AP2EREBP_tnt.ERF105_colamp_a_m1	ERF105	Brachypodium	4953	4976	+	15.303	3.37e-06	0.0175	CCCCCCCCACCACCACCACCACCA
386	AP2EREBP_tnt.ERF10_col_a_m1	ERF10	Brachypodium	4952	4972	+	15.2879	3.48e-06	0.0215	CCCCCCCCCACCACCACCACC
387	AP2EREBP_tnt.ERF104_colamp_a_m1	ERF104	Brachypodium	4915	4929	-	15.4	3.62e-06	0.0275	GACTGGCGGCGGCGC
388	mTERF_tnt.AT5G23930_col_a_m1	AT5G23930	Brachypodium	4907	4926	+	14.9091	3.71e-06	0.0231	GGCTCGCTGCGCCGCCGCCA
389	mTERF_tnt.AT5G23930_col_a_m1	AT5G23930	Brachypodium	4951	4970	+	14.8939	3.75e-06	0.0231	CCCCCCCCCCACCACCACCA
390	BBRBPC_tnt.BPC1_colamp_a_m1	BPC1	Brachypodium	2035	2049	-	13.6515	3.76e-06	0.0401	CTCTTTTTTTCTCTC
391	BBRBPC_tnt.BPC1_col_a_m1	BPC1	Brachypodium	1296	1319	+	7.90909	3.77e-06	0.018	GAGGAGGAGAAGAAGAGAGGAAGT
392	ABI3VP1_tnt.VRN1_col_a_m1	VRN1	Brachypodium	39	67	+	-3.22388	3.81e-06	0.0166	TTTATATTCTTTTTTTCCTTTTTAGTTCC
393	AP2EREBP_tnt.ERF48_col_a_m1	ERF48	Brachypodium	6016	6036	+	14.5714	3.83e-06	0.0289	GGCCGTGGAAGGAGCGGTGGA
394	AP2EREBP_tnt.ERF7_col_a_m1	ERF7	Brachypodium	4947	4967	+	14.8939	3.88e-06	0.0274	CCCCCCCCCCCCCCACCACCA
395	AP2EREBP_tnt.ERF104_col_a_m1	ERF104	Brachypodium	4910	4928	+	15.0303	3.96e-06	0.0244	TCGCTGCGCCGCCGCCAGT
396	BBRBPC_tnt.BPC1_col_a_m1	BPC1	Brachypodium	2031	2054	+	7.72727	4.03e-06	0.018	TCGTGAGAGAAAAAAAGAGAGCGC
397	AP2EREBP_tnt.ERF2_col_a_m1	ERF2	Brachypodium	4959	4979	+	14.9242	4.18e-06	0.0277	CCACCACCACCACCACCACCC
398	ABI3VP1_tnt.VRN1_col_a_m1	VRN1	Brachypodium	4392	4420	-	-3.67164	4.25e-06	0.0166	AGCCGTTTTTGTTATTTCTTTTTGTCATG
399	AP2EREBP_tnt.ERF5_colamp_a_m1	ERF5	Brachypodium	2109	2129	+	14.9697	4.27e-06	0.0352	GCGCGGCCGCCGCAACAATGG
400	BBRBPC_tnt.BPC1_col_a_m1	BPC1	Brachypodium	1376	1399	+	7.51515	4.35e-06	0.018	GAGAGAAAGAGAGGTGCAGGTGGT
401	AP2EREBP_tnt.ERF48_col_a_m1	ERF48	Brachypodium	8416	8436	-	14.3429	4.39e-06	0.0289	GCCGGAGGCGATGGTCGCGGA
402	AP2EREBP_tnt.CRF4_col_a_m1	CRF4	Brachypodium	4953	4973	+	14.2571	4.52e-06	0.0268	CCCCCCCCACCACCACCACCA
403	AP2EREBP_tnt.ERF7_colamp_a_m1	ERF7	Brachypodium	4904	4924	-	15.1515	4.53e-06	0.0384	GCGGCGGCGCAGCGAGCCTCG
404	AP2EREBP_tnt.ERF105_colamp_a_m1	ERF105	Brachypodium	4950	4973	+	14.8182	4.57e-06	0.0225	CCCCCCCCCCCACCACCACCACCA
405	AP2EREBP_tnt.ERF7_colamp_a_m1	ERF7	Brachypodium	4724	4744	-	15.1061	4.66e-06	0.0384	ATGGCGGCTGACGGCGATGAG
406	AP2EREBP_tnt.CRF4_col_a_m1	CRF4	Brachypodium	4912	4932	+	14.0143	5.17e-06	0.0283	GCTGCGCCGCCGCCAGTCGTG
407	AP2EREBP_tnt.ERF2_col_a_m1	ERF2	Brachypodium	4950	4970	+	14.5758	5.19e-06	0.0303	CCCCCCCCCCCACCACCACCA
408	C2C2gata_tnt.GATA15_col_b_m1	GATA15	Brachypodium	7646	7664	-	12.0845	5.39e-06	0.0222	CGTCATCTTCATCATCAGA
409	ABI3VP1_tnt.VRN1_col_a_m1	VRN1	Brachypodium	6779	6807	+	-4.73134	5.46e-06	0.0178	TGGATTTTGATTGTTCTTTCTTTTCTTTT
410	AP2EREBP_tnt.ERF104_col_a_m1	ERF104	Brachypodium	4954	4972	+	14.5	5.47e-06	0.0285	CCCCCCCACCACCACCACC
411	C2H2_tnt.TF3A_col_a_m1	TF3A	Brachypodium	4947	4965	+	13.888	5.5e-06	0.0295	CCCCCCCCCCCCCCACCAC
412	AP2EREBP_tnt.SHN3_col_a_m1	SHN3	Brachypodium	1385	1405	-	12.5775	5.6e-06	0.0304	GCATCCACCACCTGCACCTCT
413	BBRBPC_tnt.BPC1_colamp_a_m1	BPC1	Brachypodium	1977	1991	-	12.697	5.78e-06	0.0458	ACATCTCTCTCTTTC
414	REM_tnt.REM19_colamp_a_m1	REM19	Brachypodium	45	65	-	13.3433	5.84e-06	0.0249	AACTAAAAAGGAAAAAAAGAA
415	C2H2_tnt.TF3A_col_a_m1	TF3A	Brachypodium	4959	4977	+	13.72	6.09e-06	0.0295	CCACCACCACCACCACCAC
416	HMG_tnt.3XHMGBOX1_col_a_m1	3XHMGBOX1	Brachypodium	4904	4924	-	14.2429	6.18e-06	0.0338	GCGGCGGCGCAGCGAGCCTCG
417	C2C2gata_tnt.ZML2_col_a_m1	ZML2	Brachypodium	7640	7658	-	10.1286	6.25e-06	0.0233	CTTCATCATCAGAATCACC
418	AP2EREBP_tnt.CRF4_colamp_a_m1	CRF4	Brachypodium	4959	4973	-	14.0303	6.36e-06	0.0485	TGGTGGTGGTGGTGG
419	AP2EREBP_tnt.CRF4_colamp_a_m1	CRF4	Brachypodium	4962	4976	-	14.0303	6.36e-06	0.0485	TGGTGGTGGTGGTGG
420	AP2EREBP_tnt.ERF10_col_a_m1	ERF10	Brachypodium	4949	4969	+	14.3333	6.37e-06	0.0323	CCCCCCCCCCCCACCACCACC
421	AP2EREBP_tnt.ERF48_col_a_m1	ERF48	Brachypodium	4955	4975	-	13.6429	6.56e-06	0.0289	GGTGGTGGTGGTGGTGGGGGG
422	AP2EREBP_tnt.CRF4_col_a_m1	CRF4	Brachypodium	4965	4985	+	13.5714	6.58e-06	0.0311	CCACCACCACCACCCTCGCGT
423	AP2EREBP_tnt.CRF4_col_a_m1	CRF4	Brachypodium	4782	4802	+	13.5571	6.63e-06	0.0311	CCTTCGCCTCCGCGACAGCTC
424	REM_tnt.REM19_col_a_m1	REM19	Brachypodium	45	59	-	14.3582	6.66e-06	0.032	AAAGGAAAAAAAGAA
425	AP2EREBP_tnt.ERF48_col_a_m1	ERF48	Brachypodium	8413	8433	-	13.6	6.72e-06	0.0289	GGAGGCGATGGTCGCGGATGC
426	AP2EREBP_tnt.ERF73_col_a_m1	ERF73	Brachypodium	2109	2129	+	13.9697	6.84e-06	0.0483	GCGCGGCCGCCGCAACAATGG
427	C2C2gata_tnt.ZML1_col_a_m1	ZML1	Brachypodium	7654	7668	-	9.65152	6.92e-06	0.0324	TAATCGTCATCTTCA
428	AP2EREBP_tnt.ERF105_colamp_a_m1	ERF105	Brachypodium	4947	4970	+	14.1061	6.99e-06	0.0305	CCCCCCCCCCCCCCACCACCACCA
429	AP2EREBP_tnt.ESE1_colamp_a_m1	ESE1	Brachypodium	4953	4972	-	13.2571	7.06e-06	0.0349	GGTGGTGGTGGTGGGGGGGG
430	AP2EREBP_tnt.SHN3_col_a_m1	SHN3	Brachypodium	8416	8436	+	11.8451	7.99e-06	0.0305	TCCGCGACCATCGCCTCCGGC
431	AP2EREBP_tnt.ERF5_col_a_m1	ERF5	Brachypodium	4956	4970	+	13.7273	8.05e-06	0.0477	CCCCCACCACCACCA
432	ABI3VP1_tnt.VRN1_col_a_m1	VRN1	Brachypodium	36	64	+	-6.46269	8.15e-06	0.0234	ATGTTTATATTCTTTTTTTCCTTTTTAGT
433	AP2EREBP_tnt.ERF48_col_a_m1	ERF48	Brachypodium	1382	1402	+	13.1429	8.67e-06	0.033	AAGAGAGGTGCAGGTGGTGGA
434	BBRBPC_tnt.BPC1_colamp_a_m1	BPC1	Brachypodium	2037	2051	-	11.7121	8.7e-06	0.0482	CTCTCTTTTTTTCTC
435	mTERF_tnt.AT5G23930_col_a_m1	AT5G23930	Brachypodium	4774	4793	+	13.4697	8.87e-06	0.0398	AGCATCAACCTTCGCCTCCG
436	AP2EREBP_tnt.ERF105_colamp_a_m1	ERF105	Brachypodium	8411	8434	+	13.6667	8.98e-06	0.0369	CGGCATCCGCGACCATCGCCTCCG
437	LOBAS2_tnt.LOB_col_a_m1	LOB	Brachypodium	4849	4869	-	13	9.53e-06	0.04	TCTGCCGACGACTCCGCGGCG
438	BBRBPC_tnt.BPC1_col_a_m1	BPC1	Brachypodium	1435	1458	-	5.25758	9.72e-06	0.0285	ATTAGAGAGAGCCAAGGAAAAAGC
439	AP2EREBP_tnt.ERF104_col_a_m1	ERF104	Brachypodium	4951	4969	+	13.4545	9.98e-06	0.0414	CCCCCCCCCCACCACCACC
440	ABI3VP1_tnt.VRN1_col_a_m1	VRN1	Brachypodium	7387	7415	+	-7.35821	9.98e-06	0.0238	CTTGTGTCTGTCTTTCCTTTTCTTTTGAG
441	ABI3VP1_tnt.VRN1_col_a_m1	VRN1	Brachypodium	6773	6801	+	-7.38806	1e-05	0.0238	CTGCTTTGGATTTTGATTGTTCTTTCTTT
442	mTERF_tnt.AT5G23930_col_a_m1	AT5G23930	Brachypodium	4904	4923	+	13.2121	1.03e-05	0.0418	CGAGGCTCGCTGCGCCGCCG
443	AP2EREBP_tnt.ERF2_colamp_a_m1	ERF2	Brachypodium	8542	8562	-	13.5758	1.07e-05	0.0482	TCGCTGTTCTGGCAGCCGCCA
444	C2C2gata_tnt.ZML2_col_a_m1	ZML2	Brachypodium	4960	4978	+	8.72857	1.08e-05	0.0334	CACCACCACCACCACCACC
445	LOBAS2_tnt.LOB_col_a_m1	LOB	Brachypodium	8413	8433	+	12.7121	1.12e-05	0.04	GCATCCGCGACCATCGCCTCC
446	ABI3VP1_tnt.VRN1_col_a_m1	VRN1	Brachypodium	6777	6805	+	-7.9403	1.14e-05	0.0243	TTTGGATTTTGATTGTTCTTTCTTTTCTT
447	ABI3VP1_tnt.VRN1_colamp_a_m1	VRN1	Brachypodium	43	61	+	11.3472	1.14e-05	0.0428	TATTCTTTTTTTCCTTTTT
448	LOBAS2_tnt.LOB_col_a_m1	LOB	Brachypodium	4958	4978	+	12.6667	1.15e-05	0.04	CCCACCACCACCACCACCACC
449	AP2EREBP_tnt.ERF2_colamp_a_m1	ERF2	Brachypodium	4723	4743	+	13.3939	1.18e-05	0.0482	ACTCATCGCCGTCAGCCGCCA
450	REM_tnt.REM19_colamp_a_m1	REM19	Brachypodium	44	64	-	11.806	1.23e-05	0.0296	ACTAAAAAGGAAAAAAAGAAT
451	AP2EREBP_tnt.ESE1_colamp_a_m1	ESE1	Brachypodium	4950	4969	-	12.0571	1.24e-05	0.047	GGTGGTGGTGGGGGGGGGGG
452	C2C2gata_tnt.ZML2_col_a_m1	ZML2	Brachypodium	7655	7673	-	8.28571	1.28e-05	0.0343	TATCATAATCGTCATCTTC
453	REM_tnt.REM19_col_a_m1	REM19	Brachypodium	3048	3062	+	13.209	1.3e-05	0.0429	GGAAAACACAAAAAA
454	ABI3VP1_tnt.VRN1_col_a_m1	VRN1	Brachypodium	460	488	-	-8.59701	1.31e-05	0.0253	TTCTTTCCTGTCTTAATTTTTTTAGTGTT
455	C2C2gata_tnt.ZML2_col_a_m1	ZML2	Brachypodium	8341	8359	+	8.17143	1.34e-05	0.0343	CATCGTCGTCTTCATCCGA
456	ABI3VP1_tnt.VRN1_col_a_m1	VRN1	Brachypodium	37	65	+	-8.70149	1.35e-05	0.0253	TGTTTATATTCTTTTTTTCCTTTTTAGTT
457	LOBAS2_tnt.LOB_col_a_m1	LOB	Brachypodium	8416	8436	+	12.3788	1.35e-05	0.0402	TCCGCGACCATCGCCTCCGGC
458	ABI3VP1_tnt.VRN1_col_a_m1	VRN1	Brachypodium	4394	4422	-	-8.91045	1.41e-05	0.0258	ACAGCCGTTTTTGTTATTTCTTTTTGTCA
459	ABI3VP1_tnt.VRN1_col_a_m1	VRN1	Brachypodium	4396	4424	-	-8.98507	1.43e-05	0.0258	GAACAGCCGTTTTTGTTATTTCTTTTTGT
460	C2C2gata_tnt.ZML2_col_a_m1	ZML2	Brachypodium	7658	7676	-	7.98571	1.44e-05	0.0345	TCTTATCATAATCGTCATC
461	ABI3VP1_tnt.VRN1_col_a_m1	VRN1	Brachypodium	6314	6342	+	-9.13433	1.48e-05	0.0262	TTTTTTAGATGCTTAATTGGTTTTCTTGT
462	ABI3VP1_tnt.VRN1_col_a_m1	VRN1	Brachypodium	30	58	+	-9.25373	1.52e-05	0.0264	TTCTCAATGTTTATATTCTTTTTTTCCTT
463	REM_tnt.REM19_colamp_a_m1	REM19	Brachypodium	43	63	-	11.2687	1.57e-05	0.0333	CTAAAAAGGAAAAAAAGAATA
464	mTERF_tnt.AT5G23930_col_a_m1	AT5G23930	Brachypodium	4948	4967	+	12.4394	1.59e-05	0.0478	CCCCCCCCCCCCCACCACCA
465	REM_tnt.REM19_col_a_m1	REM19	Brachypodium	2035	2049	+	12.8209	1.63e-05	0.0448	GAGAGAAAAAAAGAG
466	ABI3VP1_tnt.VRN1_col_a_m1	VRN1	Brachypodium	6834	6862	-	-9.61194	1.64e-05	0.0271	TGTTTAATGTTTTGTTCTTTTCCTTGTAA
467	ABI3VP1_tnt.VRN1_col_a_m1	VRN1	Brachypodium	1009	1037	-	-9.68657	1.67e-05	0.0271	TATGTGTTGTTTGGTGTTGTTTTTCCTGT
468	C2H2_tnt.TF3A_col_a_m1	TF3A	Brachypodium	5373	5391	-	11.96	1.7e-05	0.0478	CCCCCCCCCCAACTCCCTC
469	BBRBPC_tnt.BPC1_col_a_m1	BPC1	Brachypodium	1300	1323	+	3.42424	1.81e-05	0.0431	AGGAGAAGAAGAGAGGAAGTCATG
470	ABI3VP1_tnt.VRN1_col_a_m1	VRN1	Brachypodium	4388	4416	-	-10.2239	1.87e-05	0.028	GTTTTTGTTATTTCTTTTTGTCATGTGAT
471	AP2EREBP_tnt.SHN3_col_a_m1	SHN3	Brachypodium	4775	4795	+	9.98592	1.9e-05	0.0453	GCATCAACCTTCGCCTCCGCG
472	REM_tnt.REM19_colamp_a_m1	REM19	Brachypodium	6790	6810	-	10.8358	1.91e-05	0.034	TCGAAAAGAAAAGAAAGAACA
473	AP2EREBP_tnt.ERF105_colamp_a_m1	ERF105	Brachypodium	8542	8565	-	12.0909	2.07e-05	0.0485	GGCTCGCTGTTCTGGCAGCCGCCA
474	AP2EREBP_tnt.SHN3_col_a_m1	SHN3	Brachypodium	1382	1402	-	9.74648	2.11e-05	0.0461	TCCACCACCTGCACCTCTCTT
475	AP2EREBP_tnt.ERF105_colamp_a_m1	ERF105	Brachypodium	4720	4743	+	12.0152	2.15e-05	0.0489	TGGACTCATCGCCGTCAGCCGCCA
476	AP2EREBP_tnt.SHN3_col_a_m1	SHN3	Brachypodium	4781	4801	+	9.53521	2.32e-05	0.0461	ACCTTCGCCTCCGCGACAGCT
477	C2C2gata_tnt.ZML2_col_a_m1	ZML2	Brachypodium	2384	2402	-	6.45714	2.52e-05	0.0499	CATGATGATCTTCTTGATC
478	C2C2gata_tnt.ZML2_col_a_m1	ZML2	Brachypodium	6982	7000	+	6.44286	2.53e-05	0.0499	CATGGTCAACTGCACCACC
479	ABI3VP1_tnt.VRN1_col_a_m1	VRN1	Brachypodium	32	60	+	-11.806	2.62e-05	0.0327	CTCAATGTTTATATTCTTTTTTTCCTTTT
480	AP2EREBP_tnt.SHN3_col_a_m1	SHN3	Brachypodium	4849	4869	-	9.23944	2.65e-05	0.0481	TCTGCCGACGACTCCGCGGCG
481	ABI3VP1_tnt.VRN1_col_a_m1	VRN1	Brachypodium	34	62	+	-11.9104	2.67e-05	0.0328	CAATGTTTATATTCTTTTTTTCCTTTTTA
482	AP2EREBP_tnt.SHN3_col_a_m1	SHN3	Brachypodium	4967	4987	+	9.16901	2.73e-05	0.0484	ACCACCACCACCCTCGCGTCT
483	ABI3VP1_tnt.VRN1_col_a_m1	VRN1	Brachypodium	6785	6813	+	-12.2239	2.85e-05	0.0335	TTGATTGTTCTTTCTTTTCTTTTCGAGGA
484	ABI3VP1_tnt.VRN1_col_a_m1	VRN1	Brachypodium	6836	6864	-	-12.2537	2.87e-05	0.0335	AATGTTTAATGTTTTGTTCTTTTCCTTGT
485	AP2EREBP_tnt.SHN3_col_a_m1	SHN3	Brachypodium	4846	4866	-	8.94366	3.02e-05	0.0484	GCCGACGACTCCGCGGCGGCC
486	REM_tnt.REM19_colamp_a_m1	REM19	Brachypodium	4396	4416	+	9.73134	3.11e-05	0.045	ACAAAAAGAAATAACAAAAAC
487	ABI3VP1_tnt.VRN1_col_a_m1	VRN1	Brachypodium	373	401	+	-12.9254	3.3e-05	0.0366	TGTTTTTGATTATTTTCTGTTTACTGTTC
488	ABI3VP1_tnt.VRN1_col_a_m1	VRN1	Brachypodium	28	56	+	-13.0746	3.4e-05	0.0368	GTTTCTCAATGTTTATATTCTTTTTTTCC
489	ABI3VP1_tnt.VRN1_col_a_m1	VRN1	Brachypodium	6840	6868	-	-13.1493	3.45e-05	0.0369	TGTAAATGTTTAATGTTTTGTTCTTTTCC
490	REM_tnt.REM19_colamp_a_m1	REM19	Brachypodium	4395	4415	+	9.44776	3.51e-05	0.0478	GACAAAAAGAAATAACAAAAA
491	ABI3VP1_tnt.VRN1_col_a_m1	VRN1	Brachypodium	465	493	-	-13.3582	3.61e-05	0.0372	CTAGATTCTTTCCTGTCTTAATTTTTTTA
492	ABI3VP1_tnt.VRN1_col_a_m1	VRN1	Brachypodium	6833	6861	-	-13.4478	3.67e-05	0.0372	GTTTAATGTTTTGTTCTTTTCCTTGTAAT
493	ABI3VP1_tnt.VRN1_col_a_m1	VRN1	Brachypodium	40	68	+	-14.2985	4.36e-05	0.0397	TTATATTCTTTTTTTCCTTTTTAGTTCCC
494	ABI3VP1_tnt.VRN1_col_a_m1	VRN1	Brachypodium	368	396	+	-14.3433	4.4e-05	0.0397	AACTGTGTTTTTGATTATTTTCTGTTTAC
495	ABI3VP1_tnt.VRN1_col_a_m1	VRN1	Brachypodium	366	394	+	-14.8358	4.86e-05	0.041	AGAACTGTGTTTTTGATTATTTTCTGTTT
496	ABI3VP1_tnt.VRN1_col_a_m1	VRN1	Brachypodium	6782	6810	+	-14.8358	4.86e-05	0.041	ATTTTGATTGTTCTTTCTTTTCTTTTCGA
497	ABI3VP1_tnt.VRN1_col_a_m1	VRN1	Brachypodium	7385	7413	+	-14.9701	4.99e-05	0.041	TTCTTGTGTCTGTCTTTCCTTTTCTTTTG
498	ABI3VP1_tnt.VRN1_col_a_m1	VRN1	Brachypodium	4395	4423	-	-15.4776	5.51e-05	0.0416	AACAGCCGTTTTTGTTATTTCTTTTTGTC
499	ABI3VP1_tnt.VRN1_col_a_m1	VRN1	Brachypodium	6780	6808	+	-15.9552	6.06e-05	0.0427	GGATTTTGATTGTTCTTTCTTTTCTTTTC
500	ABI3VP1_tnt.VRN1_col_a_m1	VRN1	Brachypodium	6774	6802	+	-16.3433	6.53e-05	0.0438	TGCTTTGGATTTTGATTGTTCTTTCTTTT
501	ABI3VP1_tnt.VRN1_col_a_m1	VRN1	Brachypodium	33	61	+	-16.403	6.61e-05	0.0438	TCAATGTTTATATTCTTTTTTTCCTTTTT
502	ABI3VP1_tnt.VRN1_col_a_m1	VRN1	Brachypodium	1082	1110	-	-16.6866	6.98e-05	0.0449	CTAGTGTTTATTTGTTACTTGTTTGTTGT
503	ABI3VP1_tnt.VRN1_col_a_m1	VRN1	Brachypodium	4391	4419	-	-16.9254	7.31e-05	0.0458	GCCGTTTTTGTTATTTCTTTTTGTCATGT
504	ABI3VP1_tnt.VRN1_col_a_m1	VRN1	Brachypodium	1080	1108	-	-17.5224	8.2e-05	0.0458	AGTGTTTATTTGTTACTTGTTTGTTGTAC
505	ABI3VP1_tnt.VRN1_col_a_m1	VRN1	Brachypodium	367	395	+	-17.5821	8.29e-05	0.0458	GAACTGTGTTTTTGATTATTTTCTGTTTA
506	ABI3VP1_tnt.VRN1_col_a_m1	VRN1	Brachypodium	2036	2064	-	-17.7313	8.53e-05	0.0458	ATTTGATGGTGCGCTCTCTTTTTTTCTCT
507	ABI3VP1_tnt.VRN1_col_a_m1	VRN1	Brachypodium	4387	4415	-	-17.9104	8.83e-05	0.0458	TTTTTGTTATTTCTTTTTGTCATGTGATT
508	ABI3VP1_tnt.VRN1_col_a_m1	VRN1	Brachypodium	4390	4418	-	-18.5373	9.94e-05	0.0489	CCGTTTTTGTTATTTCTTTTTGTCATGTG
509	BBRBPC_tnt.BPC5_col_a_m1	BPC5	Maize	5556	5585	-	-3.69737	1.15e-08	0.00111	AGGGAGTGGGATAGAGAGTGAAACAGTGAG
510	MYBrelated_tnt.AT1G72740_col_a_m1	AT1G72740	Maize	2135	2149	+	21.3857	1.9e-08	0.00189	CCGAAACCCTAATTC
511	BBRBPC_tnt.BPC5_col_a_m1	BPC5	Maize	5568	5597	-	-15.8684	1.95e-07	0.00794	GAAATTTGAAATAGGGAGTGGGATAGAGAG
512	BBRBPC_tnt.BPC5_colamp_a_m1	BPC5	Maize	5560	5588	-	14.5366	2.19e-07	0.00522	AATAGGGAGTGGGATAGAGAGTGAAACAG
513	BBRBPC_tnt.BPC5_col_a_m1	BPC5	Maize	5560	5589	-	-17	2.47e-07	0.00794	AAATAGGGAGTGGGATAGAGAGTGAAACAG
514	MYBrelated_tnt.AT1G72740_colamp_a_m1	AT1G72740	Maize	2136	2156	-	18.4697	3.05e-07	0.0154	GCTCGTGGAATTAGGGTTTCG
515	C2C2gata_tnt.GATA15_col_b_m1	GATA15	Maize	2378	2396	-	17.5634	3.32e-07	0.00364	CATGATGATCTTCTTGATC
516	REM_tnt.REM19_col_a_m1	REM19	Maize	3981	3995	+	18.3582	3.36e-07	0.00711	GAAAAAAAAAAGAAA
517	REM_tnt.REM19_colamp_a_m1	REM19	Maize	3977	3997	+	18.1493	4.02e-07	0.00926	TTTGGAAAAAAAAAAGAAATT
518	REM_tnt.REM19_colamp_a_m1	REM19	Maize	3978	3998	+	17.8209	4.92e-07	0.00926	TTGGAAAAAAAAAAGAAATTC
519	BBRBPC_tnt.BPC1_col_a_m1	BPC1	Maize	5565	5588	-	12.3485	6.72e-07	0.0124	AATAGGGAGTGGGATAGAGAGTGA
520	BBRBPC_tnt.BPC5_col_a_m1	BPC5	Maize	5554	5583	-	-22.8026	8.35e-07	0.0175	GGAGTGGGATAGAGAGTGAAACAGTGAGTC
521	REM_tnt.REM19_col_a_m1	REM19	Maize	6427	6441	-	17.2985	8.49e-07	0.00842	CACAAAAAAAAACAA
522	BBRBPC_tnt.BPC1_col_a_m1	BPC1	Maize	5567	5590	-	11.7576	8.54e-07	0.0124	GAAATAGGGAGTGGGATAGAGAGT
523	AP2EREBP_tnt.ERF105_colamp_a_m1	ERF105	Maize	643	666	+	17.1818	9.09e-07	0.0069	ACGTCGTTGAGTTCACCGCCGCCG
524	BBRBPC_tnt.BPC5_col_a_m1	BPC5	Maize	5562	5591	-	-23.8816	1.05e-06	0.0175	TGAAATAGGGAGTGGGATAGAGAGTGAAAC
525	C2C2gata_tnt.ZML2_col_a_m1	ZML2	Maize	5786	5804	-	14.1571	1.12e-06	0.0101	AGTCATCCTCTTCTTCATC
526	BBRBPC_tnt.BPC1_col_a_m1	BPC1	Maize	5555	5578	-	10.8333	1.23e-06	0.0124	GGGATAGAGAGTGAAACAGTGAGT
527	mTERF_tnt.AT5G23930_col_a_m1	AT5G23930	Maize	647	666	+	16.2879	1.5e-06	0.0146	CGTTGAGTTCACCGCCGCCG
528	BBRBPC_tnt.BPC1_col_a_m1	BPC1	Maize	5557	5580	-	10.0303	1.69e-06	0.0124	GTGGGATAGAGAGTGAAACAGTGA
529	REM_tnt.REM19_colamp_a_m1	REM19	Maize	3976	3996	+	15.6567	1.74e-06	0.0129	TTTTGGAAAAAAAAAAGAAAT
530	BBRBPC_tnt.BPC5_colamp_a_m1	BPC5	Maize	5568	5596	-	8.76829	1.8e-06	0.0172	AAATTTGAAATAGGGAGTGGGATAGAGAG
531	ABI3VP1_tnt.VRN1_colamp_a_m1	VRN1	Maize	6425	6443	+	15.4722	1.96e-06	0.0232	AATTGTTTTTTTTTGTGAT
532	AP2EREBP_tnt.ERF104_col_a_m1	ERF104	Maize	2084	2102	+	16	2.11e-06	0.0174	CGCAGCGGCGGCCGCCGCC
533	BBRBPC_tnt.BPC5_col_a_m1	BPC5	Maize	5558	5587	-	-27.4737	2.16e-06	0.0297	ATAGGGAGTGGGATAGAGAGTGAAACAGTG
534	REM_tnt.REM19_colamp_a_m1	REM19	Maize	6424	6444	-	15.1493	2.29e-06	0.0154	AATCACAAAAAAAAACAATTT
535	REM_tnt.REM19_col_a_m1	REM19	Maize	3980	3994	+	15.9701	2.29e-06	0.0169	GGAAAAAAAAAAGAA
536	MYBrelated_tnt.AT1G72740_colamp_a_m1	AT1G72740	Maize	7007	7027	-	16.1667	2.62e-06	0.0421	AAATTTGAAGTTAGGGTTCGA
537	C2C2gata_tnt.ZML2_col_a_m1	ZML2	Maize	5783	5801	-	12.2143	2.64e-06	0.013	CATCCTCTTCTTCATCAGA
538	BBRBPC_tnt.BPC5_col_a_m1	BPC5	Maize	5552	5581	-	-28.6053	2.64e-06	0.0297	AGTGGGATAGAGAGTGAAACAGTGAGTCTC
539	AP2EREBP_tnt.ERF2_colamp_a_m1	ERF2	Maize	646	666	+	15.803	2.67e-06	0.0203	TCGTTGAGTTCACCGCCGCCG
540	AP2EREBP_tnt.ESE1_colamp_a_m1	ESE1	Maize	2083	2102	-	15.1286	2.7e-06	0.0205	GGCGGCGGCCGCCGCTGCGC
541	AP2EREBP_tnt.AT4G18450_col_a_m1	AT4G18450	Maize	651	667	-	15.4697	3.04e-06	0.0231	CCGGCGGCGGTGAACTC
542	AP2EREBP_tnt.ERF73_colamp_a_m1	ERF73	Maize	2084	2104	-	14.7895	3.07e-06	0.0253	TGGGCGGCGGCCGCCGCTGCG
543	ABI3VP1_tnt.VRN1_colamp_a_m1	VRN1	Maize	6427	6445	+	14.3194	3.35e-06	0.0265	TTGTTTTTTTTTGTGATTG
544	BBRBPC_tnt.BPC5_col_a_m1	BPC5	Maize	3325	3354	+	-30.1447	3.6e-06	0.0297	AGAGTGAGAGATCAAGGGTTACAATGAGGA
545	BBRBPC_tnt.BPC1_col_a_m1	BPC1	Maize	5563	5586	-	7.87879	3.81e-06	0.018	TAGGGAGTGGGATAGAGAGTGAAA
546	C2C2gata_tnt.ZML1_col_a_m1	ZML1	Maize	5788	5802	-	11.3333	3.83e-06	0.0265	TCATCCTCTTCTTCA
547	HMG_tnt.3XHMGBOX1_col_a_m1	3XHMGBOX1	Maize	647	667	-	14.7429	4.05e-06	0.0285	CCGGCGGCGGTGAACTCAACG
548	ABI3VP1_tnt.VRN1_colamp_a_m1	VRN1	Maize	5391	5409	+	13.7778	4.26e-06	0.0305	ATCTATTTTTTTGTGTGTG
549	BBRBPC_tnt.BPC5_col_a_m1	BPC5	Maize	3323	3352	+	-31.2368	4.52e-06	0.0297	ATAGAGTGAGAGATCAAGGGTTACAATGAG
550	ABI3VP1_tnt.VRN1_colamp_a_m1	VRN1	Maize	6426	6444	+	13.625	4.55e-06	0.0305	ATTGTTTTTTTTTGTGATT
551	LOBAS2_tnt.LOB_col_a_m1	LOB	Maize	7038	7058	+	14.2424	4.64e-06	0.0343	TTCGCCGACAACTCCGCTGGG
552	BBRBPC_tnt.BPC5_colamp_a_m1	BPC5	Maize	5562	5590	-	5.60976	5.04e-06	0.0283	GAAATAGGGAGTGGGATAGAGAGTGAAAC
553	AP2EREBP_tnt.ERF104_colamp_a_m1	ERF104	Maize	2086	2100	+	14.8429	5.08e-06	0.0359	CAGCGGCGGCCGCCG
554	HMG_tnt.3XHMGBOX1_col_a_m1	3XHMGBOX1	Maize	644	664	-	14.4571	5.17e-06	0.0338	GCGGCGGTGAACTCAACGACG
555	AP2EREBP_tnt.AT4G18450_col_a_m1	AT4G18450	Maize	2085	2101	-	14.2273	6.11e-06	0.0402	GCGGCGGCCGCCGCTGC
556	C2H2_tnt.TF3A_col_a_m1	TF3A	Maize	5786	5804	-	13.672	6.27e-06	0.0295	AGTCATCCTCTTCTTCATC
557	AP2EREBP_tnt.ERF5_colamp_a_m1	ERF5	Maize	655	675	+	14.197	6.61e-06	0.0421	TCACCGCCGCCGGGCGAGCTG
558	AP2EREBP_tnt.ERF104_colamp_a_m1	ERF104	Maize	2089	2103	-	14.3714	6.64e-06	0.0434	GGGCGGCGGCCGCCG
559	AP2EREBP_tnt.ERF48_col_a_m1	ERF48	Maize	1012	1032	-	13.6	6.72e-06	0.0289	TGCGTCTATGACGACGGTGGT
560	AP2EREBP_tnt.ERF10_col_a_m1	ERF10	Maize	648	668	+	14.2121	6.85e-06	0.0323	GTTGAGTTCACCGCCGCCGGG
561	AP2EREBP_tnt.ERF73_colamp_a_m1	ERF73	Maize	647	667	-	13.1974	6.86e-06	0.036	CCGGCGGCGGTGAACTCAACG
562	AP2EREBP_tnt.ERF2_colamp_a_m1	ERF2	Maize	2080	2100	+	14.3333	6.91e-06	0.0482	CACGCGCAGCGGCGGCCGCCG
563	AP2EREBP_tnt.ERF7_col_a_m1	ERF7	Maize	646	666	+	14.0152	7e-06	0.0372	TCGTTGAGTTCACCGCCGCCG
564	C2H2_tnt.TF3A_col_a_m1	TF3A	Maize	2447	2465	+	13.464	7.1e-06	0.0295	CGACCTCTTCTTCTTCCTT
565	REM_tnt.REM19_colamp_a_m1	REM19	Maize	6426	6446	-	12.8806	7.34e-06	0.0249	ACAATCACAAAAAAAAACAAT
566	REM_tnt.REM19_colamp_a_m1	REM19	Maize	6423	6443	-	12.791	7.67e-06	0.0249	ATCACAAAAAAAAACAATTTC
567	AP2EREBP_tnt.ERF10_col_a_m1	ERF10	Maize	582	602	-	14	7.78e-06	0.0332	GCCACCCTCCTCGCCGCAGGA
568	AP2EREBP_tnt.ESE1_colamp_a_m1	ESE1	Maize	2086	2105	-	13.0429	7.83e-06	0.0368	GTGGGCGGCGGCCGCCGCTG
569	LOBAS2_tnt.LOB_col_a_m1	LOB	Maize	573	593	+	13.303	8.02e-06	0.0383	GTCTCCTCCTCCTGCGGCGAG
570	LOBAS2_tnt.LOB_col_a_m1	LOB	Maize	570	590	+	13.2727	8.16e-06	0.0383	GCTGTCTCCTCCTCCTGCGGC
571	AP2EREBP_tnt.CRF4_col_a_m1	CRF4	Maize	655	675	+	13.1571	8.2e-06	0.0351	TCACCGCCGCCGGGCGAGCTG
572	REM_tnt.REM19_colamp_a_m1	REM19	Maize	5391	5411	-	12.5224	8.73e-06	0.0249	GACACACACAAAAAAATAGAT
573	ABI3VP1_tnt.VRN1_colamp_a_m1	VRN1	Maize	3979	3997	-	11.9861	8.92e-06	0.0422	AATTTCTTTTTTTTTTCCA
574	BBRBPC_tnt.BPC5_colamp_a_m1	BPC5	Maize	5556	5584	-	3.64634	9.2e-06	0.0439	GGGAGTGGGATAGAGAGTGAAACAGTGAG
575	REM_tnt.REM19_col_a_m1	REM19	Maize	3982	3996	+	13.7463	9.54e-06	0.0399	AAAAAAAAAAGAAAT
576	BBRBPC_tnt.BPC1_col_a_m1	BPC1	Maize	5559	5582	-	5.27273	9.67e-06	0.0285	GAGTGGGATAGAGAGTGAAACAGT
577	AP2EREBP_tnt.ERF2_colamp_a_m1	ERF2	Maize	2083	2103	+	13.7424	9.73e-06	0.0482	GCGCAGCGGCGGCCGCCGCCC
578	C2C2gata_tnt.ZML1_col_a_m1	ZML1	Maize	5785	5799	-	8.63636	9.73e-06	0.0381	TCCTCTTCTTCATCA
579	ABI3VP1_tnt.VRN1_col_a_m1	VRN1	Maize	5395	5423	+	-7.28358	9.81e-06	0.0238	ATTTTTTTGTGTGTGTCTGTTTTTGCGCA
580	AP2EREBP_tnt.ERF104_col_a_m1	ERF104	Maize	650	668	+	13.4394	1.01e-05	0.0414	TGAGTTCACCGCCGCCGGG
581	BBRBPC_tnt.BPC1_col_a_m1	BPC1	Maize	5569	5592	-	5.09091	1.03e-05	0.0286	TTGAAATAGGGAGTGGGATAGAGA
582	ABI3VP1_tnt.VRN1_col_a_m1	VRN1	Maize	6754	6782	-	-8.02985	1.16e-05	0.0243	GAGAAATCTTTTTAGTTTGTTTTGTTTCA
583	ABI3VP1_tnt.VRN1_colamp_a_m1	VRN1	Maize	3978	3996	-	11.0417	1.28e-05	0.0432	ATTTCTTTTTTTTTTCCAA
584	REM_tnt.REM19_col_a_m1	REM19	Maize	5393	5407	-	13.2388	1.28e-05	0.0429	CACACAAAAAAATAG
585	REM_tnt.REM19_colamp_a_m1	REM19	Maize	6753	6773	+	11.7015	1.29e-05	0.0303	TTGAAACAAAACAAACTAAAA
586	REM_tnt.REM19_colamp_a_m1	REM19	Maize	6887	6907	+	11.5522	1.38e-05	0.0309	AAGTGAAACAAACAAAATGTA
587	AP2EREBP_tnt.ERF105_colamp_a_m1	ERF105	Maize	2077	2100	+	12.8636	1.39e-05	0.0471	TAGCACGCGCAGCGGCGGCCGCCG
588	C2C2gata_tnt.ZML2_col_a_m1	ZML2	Maize	4134	4152	-	8.07143	1.39e-05	0.0343	CAGCATCTTCAGCATCCTC
589	C2H2_tnt.TF3A_col_a_m1	TF3A	Maize	2268	2286	-	12.28	1.42e-05	0.0458	TTGCCTCATACTCCTCCTG
590	REM_tnt.REM19_col_a_m1	REM19	Maize	6429	6443	-	12.9403	1.52e-05	0.0429	ATCACAAAAAAAAAC
591	C2C2gata_tnt.ZML2_col_a_m1	ZML2	Maize	5780	5798	-	7.82857	1.52e-05	0.0349	CCTCTTCTTCATCAGAGTC
592	AP2EREBP_tnt.ESE1_colamp_a_m1	ESE1	Maize	649	668	-	11.5714	1.53e-05	0.0479	CCCGGCGGCGGTGAACTCAA
593	REM_tnt.REM19_colamp_a_m1	REM19	Maize	3508	3528	-	11.194	1.63e-05	0.0333	GTTACAAATAAAAAAATCAAT
594	AP2EREBP_tnt.ERF105_colamp_a_m1	ERF105	Maize	2156	2179	+	11.9545	2.21e-05	0.0489	CACCCGGGCCCCCTCGCTCCGCCA
595	C2C2gata_tnt.ZML2_col_a_m1	ZML2	Maize	2378	2396	-	6.45714	2.52e-05	0.0499	CATGATGATCTTCTTGATC
596	AP2EREBP_tnt.SHN3_col_a_m1	SHN3	Maize	1012	1032	+	9.08451	2.84e-05	0.0484	ACCACCGTCGTCATAGACGCA
597	REM_tnt.REM19_colamp_a_m1	REM19	Maize	1989	2009	+	9.8209	2.99e-05	0.0442	GAGGCAATAAAAAAAAATTGC
598	AP2EREBP_tnt.SHN3_col_a_m1	SHN3	Maize	1227	1247	-	8.94366	3.02e-05	0.0484	TCGGCCTCAGCCTCGGCCTCG
599	ABI3VP1_tnt.VRN1_col_a_m1	VRN1	Maize	6306	6334	+	-13.5075	3.72e-05	0.0372	AAATAGTTTTTCTTGTATTTATTTTGAAT
600	ABI3VP1_tnt.VRN1_col_a_m1	VRN1	Maize	6422	6450	+	-13.7463	3.9e-05	0.0386	AGAAATTGTTTTTTTTTGTGATTGTTTGC
601	ABI3VP1_tnt.VRN1_col_a_m1	VRN1	Maize	2474	2502	+	-14.5522	4.59e-05	0.041	GCGTTGCATTTCCTGTTTGTTCTTGTGCT
602	ABI3VP1_tnt.VRN1_col_a_m1	VRN1	Maize	6426	6454	+	-14.791	4.81e-05	0.041	ATTGTTTTTTTTTGTGATTGTTTGCTAGG
603	ABI3VP1_tnt.VRN1_col_a_m1	VRN1	Maize	5240	5268	+	-14.9104	4.93e-05	0.041	TTTTTCTCATTATATTCTTATCTTTAGAT
604	ABI3VP1_tnt.VRN1_col_a_m1	VRN1	Maize	6423	6451	+	-15.1194	5.14e-05	0.0416	GAAATTGTTTTTTTTTGTGATTGTTTGCT
605	ABI3VP1_tnt.VRN1_col_a_m1	VRN1	Maize	6635	6663	-	-15.4478	5.48e-05	0.0416	GTATAATATTTAAATATTTATTTATGTAC
606	ABI3VP1_tnt.VRN1_col_a_m1	VRN1	Maize	4305	4333	+	-15.4627	5.5e-05	0.0416	TGCTTTGTGCTTATATATTGTTTGTTTAT
607	ABI3VP1_tnt.VRN1_col_a_m1	VRN1	Maize	6421	6449	+	-15.8955	5.99e-05	0.0427	GAGAAATTGTTTTTTTTTGTGATTGTTTG
608	ABI3VP1_tnt.VRN1_col_a_m1	VRN1	Maize	5393	5421	+	-16.0448	6.16e-05	0.0427	CTATTTTTTTGTGTGTGTCTGTTTTTGCG
609	ABI3VP1_tnt.VRN1_col_a_m1	VRN1	Maize	3976	4004	-	-16.2836	6.46e-05	0.0438	ACAGCAGAATTTCTTTTTTTTTTCCAAAA
610	ABI3VP1_tnt.VRN1_col_a_m1	VRN1	Maize	6307	6335	+	-16.3881	6.59e-05	0.0438	AATAGTTTTTCTTGTATTTATTTTGAATT
611	ABI3VP1_tnt.VRN1_col_a_m1	VRN1	Maize	6427	6455	+	-17.1194	7.59e-05	0.0458	TTGTTTTTTTTTGTGATTGTTTGCTAGGG
612	ABI3VP1_tnt.VRN1_col_a_m1	VRN1	Maize	6313	6341	+	-17.1642	7.66e-05	0.0458	TTTTCTTGTATTTATTTTGAATTATGTAT
613	ABI3VP1_tnt.VRN1_col_a_m1	VRN1	Maize	3501	3529	+	-17.4179	8.04e-05	0.0458	GGGAATCATTGATTTTTTTATTTGTAACT
614	ABI3VP1_tnt.VRN1_col_a_m1	VRN1	Maize	3072	3100	+	-17.9851	8.96e-05	0.046	TGTGTGGTTTAATTTATTAGTTTTTGTGG
615	ABI3VP1_tnt.VRN1_col_a_m1	VRN1	Maize	3977	4005	-	-18.2836	9.48e-05	0.0474	CACAGCAGAATTTCTTTTTTTTTTCCAAA
616	ABI3VP1_tnt.VRN1_col_a_m1	VRN1	Maize	6750	6778	-	-18.5373	9.94e-05	0.0489	AATCTTTTTAGTTTGTTTTGTTTCAATAT
617	ABI3VP1_tnt.VRN1_colamp_a_m1	VRN1	Sorghum	3600	3618	+	22.2361	2.49e-08	0.00236	ATGGTTTTTTTTTTTTTTA
618	ABI3VP1_tnt.VRN1_col_a_m1	VRN1	Sorghum	3595	3623	+	14.2836	2.65e-08	0.00244	GAATCATGGTTTTTTTTTTTTTTACTTTT
619	REM_tnt.REM19_colamp_a_m1	REM19	Sorghum	3601	3621	-	21.7015	3.42e-08	0.00322	AAGTAAAAAAAAAAAAAACCA
620	BBRBPC_tnt.BPC5_colamp_a_m1	BPC5	Sorghum	244	272	+	18.6951	3.83e-08	0.00365	AGCACAGAGAGCACAAAAAAGAGAGAAAG
621	BBRBPC_tnt.BPC1_col_a_m1	BPC1	Sorghum	743	766	+	17.9091	5.91e-08	0.00563	CAGAGAGAGTGAGGGGGAGAAAAT
622	ABI3VP1_tnt.VRN1_col_a_m1	VRN1	Sorghum	3598	3626	+	11.2836	7.03e-08	0.00323	TCATGGTTTTTTTTTTTTTTACTTTTGTA
623	AP2EREBP_tnt.ERF5_colamp_a_m1	ERF5	Sorghum	2098	2118	+	20.1667	7.75e-08	0.00443	CGGCCGCCGCCGCAGCCCTCA
624	REM_tnt.REM19_col_a_m1	REM19	Sorghum	3603	3617	-	19.4776	1.06e-07	0.00523	AAAAAAAAAAAAAAC
625	MYBrelated_tnt.AT1G72740_col_a_m1	AT1G72740	Sorghum	2147	2161	+	19.8143	1.26e-07	0.00625	CAAAAACCCTAATTC
626	BBRBPC_tnt.BPC1_colamp_a_m1	BPC1	Sorghum	260	274	-	19.8182	1.38e-07	0.00823	CTCTTTCTCTCTTTT
627	REM_tnt.REM19_col_a_m1	REM19	Sorghum	3605	3619	-	19.1642	1.63e-07	0.00523	GTAAAAAAAAAAAAA
628	ABI3VP1_tnt.VRN1_colamp_a_m1	VRN1	Sorghum	3599	3617	+	19.8333	1.64e-07	0.00776	CATGGTTTTTTTTTTTTTT
629	BBRBPC_tnt.BPC1_col_a_m1	BPC1	Sorghum	745	768	+	15.5152	1.75e-07	0.00834	GAGAGAGTGAGGGGGAGAAAATAA
630	AP2EREBP_tnt.ERF5_colamp_a_m1	ERF5	Sorghum	2095	2115	+	19.2879	1.79e-07	0.00443	GCGCGGCCGCCGCCGCAGCCC
631	AP2EREBP_tnt.AT4G18450_col_a_m1	AT4G18450	Sorghum	2094	2110	-	19.197	2.12e-07	0.00697	GCGGCGGCGGCCGCGCG
632	AP2EREBP_tnt.ERF73_col_a_m1	ERF73	Sorghum	2095	2115	+	19.1212	2.21e-07	0.00903	GCGCGGCCGCCGCCGCAGCCC
633	AP2EREBP_tnt.ERF104_colamp_a_m1	ERF104	Sorghum	2098	2112	-	18.9714	2.26e-07	0.00547	CTGCGGCGGCGGCCG
634	AP2EREBP_tnt.ESE1_colamp_a_m1	ESE1	Sorghum	2092	2111	-	19.0286	2.38e-07	0.00784	TGCGGCGGCGGCCGCGCGTG
635	AP2EREBP_tnt.ERF2_col_a_m1	ERF2	Sorghum	2092	2112	+	18.7424	2.51e-07	0.00828	CACGCGCGGCCGCCGCCGCAG
636	REM_tnt.REM19_colamp_a_m1	REM19	Sorghum	3600	3620	-	18.8806	2.51e-07	0.0082	AGTAAAAAAAAAAAAAACCAT
637	REM_tnt.REM19_colamp_a_m1	REM19	Sorghum	3602	3622	-	18.8209	2.61e-07	0.0082	AAAGTAAAAAAAAAAAAAACC
638	AP2EREBP_tnt.ERF10_col_a_m1	ERF10	Sorghum	2094	2114	+	18.4394	3.18e-07	0.0105	CGCGCGGCCGCCGCCGCAGCC
639	AP2EREBP_tnt.ESE1_col_a_m1	ESE1	Sorghum	2098	2112	-	18.5606	3.25e-07	0.0111	CTGCGGCGGCGGCCG
640	AP2EREBP_tnt.SHN3_col_a_m1	SHN3	Sorghum	2094	2114	+	17.8592	3.27e-07	0.00534	CGCGCGGCCGCCGCCGCAGCC
641	ABI3VP1_tnt.VRN1_col_a_m1	VRN1	Sorghum	3599	3627	+	6.13433	3.29e-07	0.0101	CATGGTTTTTTTTTTTTTTACTTTTGTAA
642	C2C2gata_tnt.GATA15_col_b_m1	GATA15	Sorghum	2390	2408	-	17.5634	3.32e-07	0.00364	CATGATGATCTTCTTGATC
643	ABI3VP1_tnt.VRN1_colamp_a_m1	VRN1	Sorghum	3603	3621	+	18.7222	3.35e-07	0.00792	GTTTTTTTTTTTTTTACTT
644	AP2EREBP_tnt.ERF105_colamp_a_m1	ERF105	Sorghum	2086	2109	+	18.1212	4.33e-07	0.00534	ACCTAGCACGCGCGGCCGCCGCCG
645	REM_tnt.REM19_col_a_m1	REM19	Sorghum	3602	3616	-	18.0448	4.34e-07	0.00711	AAAAAAAAAAAAACC
646	REM_tnt.REM19_col_a_m1	REM19	Sorghum	4062	4076	+	18.0149	4.44e-07	0.00711	CAAAAACAAAAAAAA
647	BBRBPC_tnt.BPC5_colamp_a_m1	BPC5	Sorghum	246	274	+	12.6707	4.48e-07	0.00856	CACAGAGAGCACAAAAAAGAGAGAAAGAG
648	AP2EREBP_tnt.CRF4_colamp_a_m1	CRF4	Sorghum	2098	2112	-	18.0606	4.78e-07	0.0118	CTGCGGCGGCGGCCG
649	AP2EREBP_tnt.ERF105_col_m1	ERF105	Sorghum	2099	2113	-	18.0758	5.54e-07	0.0137	GCTGCGGCGGCGGCC
650	AP2EREBP_tnt.ERF104_col_a_m1	ERF104	Sorghum	2096	2114	+	17.8182	5.6e-07	0.014	CGCGGCCGCCGCCGCAGCC
651	REM_tnt.REM19_colamp_a_m1	REM19	Sorghum	3608	3628	-	17.3582	6.52e-07	0.0102	GTTACAAAAGTAAAAAAAAAA
652	AP2EREBP_tnt.ERF73_colamp_a_m1	ERF73	Sorghum	2093	2113	-	17.4868	6.53e-07	0.00834	GCTGCGGCGGCGGCCGCGCGT
653	AP2EREBP_tnt.ERF104_col_a_m1	ERF104	Sorghum	2093	2111	+	17.4848	7.26e-07	0.0143	ACGCGCGGCCGCCGCCGCA
654	AP2EREBP_tnt.ERF73_col_a_m1	ERF73	Sorghum	2098	2118	+	17.5758	7.37e-07	0.0182	CGGCCGCCGCCGCAGCCCTCA
655	ABI3VP1_tnt.VRN1_col_a_m1	VRN1	Sorghum	3596	3624	+	3.07463	7.67e-07	0.0144	AATCATGGTTTTTTTTTTTTTTACTTTTG
656	ABI3VP1_tnt.VRN1_colamp_a_m1	VRN1	Sorghum	3601	3619	+	17.2917	7.69e-07	0.0146	TGGTTTTTTTTTTTTTTAC
657	REM_tnt.REM19_col_a_m1	REM19	Sorghum	3601	3615	-	17.3582	8.04e-07	0.00842	AAAAAAAAAAAACCA
658	AP2EREBP_tnt.ERF73_colamp_a_m1	ERF73	Sorghum	2090	2110	-	17.0263	8.67e-07	0.00952	GCGGCGGCGGCCGCGCGTGCT
659	REM_tnt.REM19_col_a_m1	REM19	Sorghum	3604	3618	-	17.2687	8.76e-07	0.00842	TAAAAAAAAAAAAAA
660	AP2EREBP_tnt.ERF104_colamp_a_m1	ERF104	Sorghum	2095	2109	-	17.4	8.84e-07	0.0145	CGGCGGCGGCCGCGC
661	AP2EREBP_tnt.ERF10_col_a_m1	ERF10	Sorghum	2091	2111	+	17.1364	9.3e-07	0.0211	GCACGCGCGGCCGCCGCCGCA
662	REM_tnt.REM19_colamp_a_m1	REM19	Sorghum	4058	4078	+	16.7015	9.61e-07	0.0129	TAGTCAAAAACAAAAAAAATT
663	BBRBPC_tnt.BPC1_col_a_m1	BPC1	Sorghum	663	686	+	11.4545	9.65e-07	0.0124	AAAGAGGGGAGAAGGAGAGAGGGA
664	AP2EREBP_tnt.SHN3_col_a_m1	SHN3	Sorghum	2097	2117	+	15.9155	9.88e-07	0.0138	GCGGCCGCCGCCGCAGCCCTC
665	ABI3VP1_tnt.VRN1_col_a_m1	VRN1	Sorghum	4064	4092	-	2.10448	9.94e-07	0.0144	CTTGTTTAGTTTGCAATTTTTTTTGTTTT
666	BBRBPC_tnt.BPC5_col_a_m1	BPC5	Sorghum	247	276	+	-24.0263	1.09e-06	0.0175	ACAGAGAGCACAAAAAAGAGAGAAAGAGCT
667	AP2EREBP_tnt.ERF7_colamp_a_m1	ERF7	Sorghum	39	59	+	17.0606	1.11e-06	0.0273	ATGGCGGCGCCATGGACGAGC
668	C2C2gata_tnt.ZML2_col_a_m1	ZML2	Sorghum	5549	5567	-	14.1571	1.12e-06	0.0101	AGTCATCCTCTTCTTCATC
669	AP2EREBP_tnt.ERF2_colamp_a_m1	ERF2	Sorghum	2089	2109	+	16.8788	1.19e-06	0.0133	TAGCACGCGCGGCCGCCGCCG
670	ABI3VP1_tnt.VRN1_col_a_m1	VRN1	Sorghum	3597	3625	+	1.34328	1.21e-06	0.0144	ATCATGGTTTTTTTTTTTTTTACTTTTGT
671	AP2EREBP_tnt.ERF5_col_a_m1	ERF5	Sorghum	2098	2112	+	16.5606	1.3e-06	0.0256	CGGCCGCCGCCGCAG
672	ABI3VP1_tnt.VRN1_colamp_a_m1	VRN1	Sorghum	3604	3622	+	16.0694	1.46e-06	0.0201	TTTTTTTTTTTTTTACTTT
673	AP2EREBP_tnt.ESE1_colamp_a_m1	ESE1	Sorghum	2098	2117	-	16.0571	1.61e-06	0.0159	GAGGGCTGCGGCGGCGGCCG
674	ABI3VP1_tnt.VRN1_col_a_m1	VRN1	Sorghum	3600	3628	+	-0.149254	1.78e-06	0.0144	ATGGTTTTTTTTTTTTTTACTTTTGTAAC
675	AP2EREBP_tnt.CRF4_colamp_a_m1	CRF4	Sorghum	2095	2109	-	16.0303	1.94e-06	0.0274	CGGCGGCGGCCGCGC
676	MYBrelated_tnt.AT1G72740_colamp_a_m1	AT1G72740	Sorghum	2148	2168	-	16.5606	1.94e-06	0.0378	GCTCGGGGAATTAGGGTTTTT
677	BBRBPC_tnt.BPC1_colamp_a_m1	BPC1	Sorghum	258	272	-	14.9545	2.03e-06	0.0297	CTTTCTCTCTTTTTT
678	BBRBPC_tnt.BPC1_col_a_m1	BPC1	Sorghum	669	692	+	9.40909	2.15e-06	0.0146	GGGAGAAGGAGAGAGGGAACTGGG
679	AP2EREBP_tnt.ERF105_colamp_a_m1	ERF105	Sorghum	40	63	-	15.9091	2.26e-06	0.0137	TCGTGCTCGTCCATGGCGCCGCCA
680	ABI3VP1_tnt.VRN1_col_a_m1	VRN1	Sorghum	3592	3620	+	-1.13433	2.28e-06	0.0144	TGAGAATCATGGTTTTTTTTTTTTTTACT
681	AP2EREBP_tnt.ERF7_colamp_a_m1	ERF7	Sorghum	2090	2110	-	16.1061	2.33e-06	0.0333	GCGGCGGCGGCCGCGCGTGCT
682	AP2EREBP_tnt.ERF105_colamp_a_m1	ERF105	Sorghum	356	379	-	15.8485	2.35e-06	0.0137	CAGCAACCGCCGAGATCGCCGTCG
683	ABI3VP1_tnt.VRN1_colamp_a_m1	VRN1	Sorghum	4060	4078	-	15.0833	2.36e-06	0.0248	AATTTTTTTTGTTTTTGAC
684	AP2EREBP_tnt.CRF4_col_a_m1	CRF4	Sorghum	2101	2121	+	15.3857	2.36e-06	0.0194	CCGCCGCCGCAGCCCTCAATG
685	AP2EREBP_tnt.AT4G18450_col_a_m1	AT4G18450	Sorghum	2097	2113	-	15.8485	2.43e-06	0.0218	GCTGCGGCGGCGGCCGC
686	BBRBPC_tnt.BPC1_col_a_m1	BPC1	Sorghum	741	764	+	8.98485	2.52e-06	0.015	TCCAGAGAGAGTGAGGGGGAGAAA
687	REM_tnt.REM19_col_a_m1	REM19	Sorghum	4060	4074	+	15.7761	2.64e-06	0.0181	GTCAAAAACAAAAAA
688	C2C2gata_tnt.ZML2_col_a_m1	ZML2	Sorghum	5546	5564	-	12.2143	2.64e-06	0.013	CATCCTCTTCTTCATCAGA
689	REM_tnt.REM19_colamp_a_m1	REM19	Sorghum	3757	3777	+	14.7612	2.82e-06	0.0177	TTTTGAAAAAAAAAAGGAATT
690	HMG_tnt.3XHMGBOX1_col_a_m1	3XHMGBOX1	Sorghum	2090	2110	-	15.1286	2.89e-06	0.0237	GCGGCGGCGGCCGCGCGTGCT
691	BBRBPC_tnt.BPC5_col_a_m1	BPC5	Sorghum	245	274	+	-29.1184	2.92e-06	0.0297	GCACAGAGAGCACAAAAAAGAGAGAAAGAG
692	mTERF_tnt.AT5G23930_col_a_m1	AT5G23930	Sorghum	2090	2109	+	15.1667	3.15e-06	0.0222	AGCACGCGCGGCCGCCGCCG
693	BBRBPC_tnt.BPC5_colamp_a_m1	BPC5	Sorghum	659	687	+	7.03659	3.2e-06	0.0251	CGCGAAAGAGGGGAGAAGGAGAGAGGGAA
694	LOBAS2_tnt.LOB_col_a_m1	LOB	Sorghum	2091	2111	+	14.8485	3.22e-06	0.0343	GCACGCGCGGCCGCCGCCGCA
695	ABI3VP1_tnt.VRN1_col_a_m1	VRN1	Sorghum	766	794	+	-2.53731	3.23e-06	0.0161	TAAGGTCCTTTCTGTTTTTATTTTTAAAC
696	ABI3VP1_tnt.VRN1_col_a_m1	VRN1	Sorghum	4062	4090	-	-2.65672	3.33e-06	0.0161	TGTTTAGTTTGCAATTTTTTTTGTTTTTG
697	AP2EREBP_tnt.ESE1_colamp_a_m1	ESE1	Sorghum	38	57	+	14.5286	3.72e-06	0.0207	CATGGCGGCGCCATGGACGA
698	C2C2gata_tnt.ZML1_col_a_m1	ZML1	Sorghum	5551	5565	-	11.3333	3.83e-06	0.0265	TCATCCTCTTCTTCA
699	REM_tnt.REM19_col_a_m1	REM19	Sorghum	3761	3775	+	15.1343	3.99e-06	0.0213	GAAAAAAAAAAGGAA
700	BBRBPC_tnt.BPC1_col_a_m1	BPC1	Sorghum	246	269	+	7.71212	4.05e-06	0.018	CACAGAGAGCACAAAAAAGAGAGA
701	AP2EREBP_tnt.CRF4_colamp_a_m1	CRF4	Sorghum	2101	2115	-	14.8182	4.07e-06	0.0448	GGGCTGCGGCGGCGG
702	ABI3VP1_tnt.VRN1_col_a_m1	VRN1	Sorghum	3601	3629	+	-3.55224	4.13e-06	0.0166	TGGTTTTTTTTTTTTTTACTTTTGTAACC
703	AP2EREBP_tnt.ERF2_col_a_m1	ERF2	Sorghum	2089	2109	+	14.8182	4.47e-06	0.0277	TAGCACGCGCGGCCGCCGCCG
704	AP2EREBP_tnt.ERF5_col_a_m1	ERF5	Sorghum	2095	2109	+	14.6667	4.54e-06	0.0449	GCGCGGCCGCCGCCG
705	BBRBPC_tnt.BPC1_colamp_a_m1	BPC1	Sorghum	262	276	-	13.2121	4.54e-06	0.0436	AGCTCTTTCTCTCTT
706	BBRBPC_tnt.BPC1_col_a_m1	BPC1	Sorghum	248	271	+	7.36364	4.6e-06	0.0183	CAGAGAGCACAAAAAAGAGAGAAA
707	AP2EREBP_tnt.ERF48_col_a_m1	ERF48	Sorghum	2097	2117	-	14.2429	4.65e-06	0.0289	GAGGGCTGCGGCGGCGGCCGC
708	BBRBPC_tnt.BPC5_col_a_m1	BPC5	Sorghum	744	773	+	-31.4079	4.67e-06	0.0297	AGAGAGAGTGAGGGGGAGAAAATAAGGTCC
709	REM_tnt.REM19_colamp_a_m1	REM19	Sorghum	4057	4077	+	13.7313	4.81e-06	0.0249	GTAGTCAAAAACAAAAAAAAT
710	BBRBPC_tnt.BPC5_col_a_m1	BPC5	Sorghum	734	763	+	-31.7237	4.97e-06	0.0297	GCCGAATTCCAGAGAGAGTGAGGGGGAGAA
711	ABI3VP1_tnt.VRN1_colamp_a_m1	VRN1	Sorghum	3602	3620	+	13.3333	5.15e-06	0.0305	GGTTTTTTTTTTTTTTACT
712	AP2EREBP_tnt.ERF7_colamp_a_m1	ERF7	Sorghum	2093	2113	-	14.9394	5.2e-06	0.0395	GCTGCGGCGGCGGCCGCGCGT
713	BBRBPC_tnt.BPC5_colamp_a_m1	BPC5	Sorghum	741	769	+	5.45122	5.3e-06	0.0283	TCCAGAGAGAGTGAGGGGGAGAAAATAAG
714	BBRBPC_tnt.BPC1_colamp_a_m1	BPC1	Sorghum	745	759	-	12.8788	5.33e-06	0.0458	CCCCCTCACTCTCTC
715	mTERF_tnt.AT5G23930_col_a_m1	AT5G23930	Sorghum	2093	2112	+	14.303	5.4e-06	0.0296	ACGCGCGGCCGCCGCCGCAG
716	REM_tnt.REM19_colamp_a_m1	REM19	Sorghum	3604	3624	-	13.4478	5.54e-06	0.0249	CAAAAGTAAAAAAAAAAAAAA
717	ABI3VP1_tnt.VRN1_col_a_m1	VRN1	Sorghum	5290	5318	+	-4.86567	5.63e-06	0.0178	TTGTTCTTTTGTGTGTTTTATTTTTGCTC
718	AP2EREBP_tnt.ERF48_col_a_m1	ERF48	Sorghum	4710	4730	-	13.9	5.67e-06	0.0289	GGAGGTGGTGCATTCGGTTGA
719	ABI3VP1_tnt.VRN1_col_a_m1	VRN1	Sorghum	5286	5314	+	-4.92537	5.71e-06	0.0178	AAAATTGTTCTTTTGTGTGTTTTATTTTT
720	AP2EREBP_tnt.CRF4_col_a_m1	CRF4	Sorghum	2095	2115	+	13.7	6.14e-06	0.0311	GCGCGGCCGCCGCCGCAGCCC
721	C2H2_tnt.TF3A_col_a_m1	TF3A	Sorghum	5549	5567	-	13.672	6.27e-06	0.0295	AGTCATCCTCTTCTTCATC
722	AP2EREBP_tnt.ERF73_colamp_a_m1	ERF73	Sorghum	2087	2107	-	13.3684	6.32e-06	0.036	GCGGCGGCCGCGCGTGCTAGG
723	AP2EREBP_tnt.ERF48_col_a_m1	ERF48	Sorghum	2094	2114	-	13.6714	6.45e-06	0.0289	GGCTGCGGCGGCGGCCGCGCG
724	REM_tnt.REM19_colamp_a_m1	REM19	Sorghum	3599	3619	-	13.1343	6.48e-06	0.0249	GTAAAAAAAAAAAAAACCATG
725	AP2EREBP_tnt.AT4G18450_col_a_m1	AT4G18450	Sorghum	39	55	+	14.0455	6.72e-06	0.0415	ATGGCGGCGCCATGGAC
726	mTERF_tnt.AT5G23930_col_a_m1	AT5G23930	Sorghum	6036	6055	+	13.9394	6.72e-06	0.0332	CTTGACGGCAGTAGCCGCCG
727	REM_tnt.REM19_colamp_a_m1	REM19	Sorghum	3606	3626	-	13.0149	6.87e-06	0.0249	TACAAAAGTAAAAAAAAAAAA
728	REM_tnt.REM19_colamp_a_m1	REM19	Sorghum	808	828	+	12.9851	6.97e-06	0.0249	AATTTCAAAAAAAATGAAAAC
729	BBRBPC_tnt.BPC1_col_a_m1	BPC1	Sorghum	568	591	+	6.19697	6.99e-06	0.0222	GCGTCAGCGAGAGGGAGGGTGAGA
730	AP2EREBP_tnt.CRF4_col_a_m1	CRF4	Sorghum	359	379	-	13.4571	7e-06	0.0313	CAGCAACCGCCGAGATCGCCG
731	AP2EREBP_tnt.ERF7_col_a_m1	ERF7	Sorghum	2092	2112	+	13.9848	7.14e-06	0.0372	CACGCGCGGCCGCCGCCGCAG
732	C2H2_tnt.TF3A_col_a_m1	TF3A	Sorghum	2280	2298	-	13.448	7.16e-06	0.0295	TCGCCTCATACTCCTCCTG
733	AP2EREBP_tnt.ERF73_colamp_a_m1	ERF73	Sorghum	39	59	+	13.0395	7.41e-06	0.036	ATGGCGGCGCCATGGACGAGC
734	REM_tnt.REM19_colamp_a_m1	REM19	Sorghum	3756	3776	+	12.8209	7.56e-06	0.0249	ATTTTGAAAAAAAAAAGGAAT
735	REM_tnt.REM19_colamp_a_m1	REM19	Sorghum	3758	3778	+	12.806	7.61e-06	0.0249	TTTGAAAAAAAAAAGGAATTT
736	AP2EREBP_tnt.ERF10_col_a_m1	ERF10	Sorghum	38	58	-	14.0303	7.64e-06	0.0332	CTCGTCCATGGCGCCGCCATG
737	REM_tnt.REM19_colamp_a_m1	REM19	Sorghum	809	829	+	12.791	7.67e-06	0.0249	ATTTCAAAAAAAATGAAAACC
738	AP2EREBP_tnt.ERF7_col_a_m1	ERF7	Sorghum	2089	2109	+	13.8636	7.72e-06	0.0382	TAGCACGCGCGGCCGCCGCCG
739	AP2EREBP_tnt.AT4G18450_col_a_m1	AT4G18450	Sorghum	2091	2107	-	13.7727	7.74e-06	0.045	GCGGCGGCCGCGCGTGC
740	LOBAS2_tnt.LOB_col_a_m1	LOB	Sorghum	2279	2299	-	13.3333	7.89e-06	0.0383	GTCGCCTCATACTCCTCCTGC
741	AP2EREBP_tnt.ERF2_colamp_a_m1	ERF2	Sorghum	40	60	-	14	8.4e-06	0.0482	TGCTCGTCCATGGCGCCGCCA
742	AP2EREBP_tnt.SHN3_col_a_m1	SHN3	Sorghum	357	377	-	11.7324	8.43e-06	0.0305	GCAACCGCCGAGATCGCCGTC
743	REM_tnt.REM19_colamp_a_m1	REM19	Sorghum	4060	4080	+	12.5672	8.54e-06	0.0249	GTCAAAAACAAAAAAAATTGC
744	ABI3VP1_tnt.VRN1_col_a_m1	VRN1	Sorghum	2934	2962	+	-6.79104	8.78e-06	0.0235	ATCCATCTTTTCATTTTTTTATTACTTAA
745	BBRBPC_tnt.BPC5_col_a_m1	BPC5	Sorghum	736	765	+	-35.1711	8.99e-06	0.0457	CGAATTCCAGAGAGAGTGAGGGGGAGAAAA
746	AP2EREBP_tnt.ERF5_col_a_m1	ERF5	Sorghum	2101	2115	+	13.4545	9.48e-06	0.0489	CCGCCGCCGCAGCCC
747	C2C2gata_tnt.ZML1_col_a_m1	ZML1	Sorghum	5548	5562	-	8.63636	9.73e-06	0.0381	TCCTCTTCTTCATCA
748	REM_tnt.REM19_colamp_a_m1	REM19	Sorghum	3597	3617	-	12.2239	1.01e-05	0.0263	AAAAAAAAAAAAAACCATGAT
749	AP2EREBP_tnt.ERF105_colamp_a_m1	ERF105	Sorghum	6032	6055	+	13.4242	1.03e-05	0.0388	GTCGCTTGACGGCAGTAGCCGCCG
750	ABI3VP1_tnt.VRN1_col_a_m1	VRN1	Sorghum	3590	3618	+	-7.52239	1.04e-05	0.0238	GATGAGAATCATGGTTTTTTTTTTTTTTA
751	AP2EREBP_tnt.ERF104_col_a_m1	ERF104	Sorghum	38	56	-	13.3636	1.05e-05	0.0415	CGTCCATGGCGCCGCCATG
752	AP2EREBP_tnt.ESE1_colamp_a_m1	ESE1	Sorghum	2089	2108	-	12.3714	1.07e-05	0.0423	GGCGGCGGCCGCGCGTGCTA
753	AP2EREBP_tnt.ERF2_colamp_a_m1	ERF2	Sorghum	2092	2112	+	13.5455	1.08e-05	0.0482	CACGCGCGGCCGCCGCCGCAG
754	AP2EREBP_tnt.ERF2_colamp_a_m1	ERF2	Sorghum	356	376	-	13.4545	1.14e-05	0.0482	CAACCGCCGAGATCGCCGTCG
755	mTERF_tnt.AT5G23930_col_a_m1	AT5G23930	Sorghum	356	375	-	13	1.16e-05	0.0424	AACCGCCGAGATCGCCGTCG
756	ABI3VP1_tnt.VRN1_colamp_a_m1	VRN1	Sorghum	3597	3615	+	11.2917	1.17e-05	0.0428	ATCATGGTTTTTTTTTTTT
757	ABI3VP1_tnt.VRN1_colamp_a_m1	VRN1	Sorghum	4061	4079	-	11.1667	1.22e-05	0.0428	CAATTTTTTTTGTTTTTGA
758	AP2EREBP_tnt.ERF104_col_a_m1	ERF104	Sorghum	2090	2108	+	13.0606	1.24e-05	0.0453	AGCACGCGCGGCCGCCGCC
759	ABI3VP1_tnt.VRN1_col_a_m1	VRN1	Sorghum	4060	4088	-	-8.50746	1.29e-05	0.0253	TTTAGTTTGCAATTTTTTTTGTTTTTGAC
760	LOBAS2_tnt.LOB_col_a_m1	LOB	Sorghum	2094	2114	+	12.4545	1.29e-05	0.0402	CGCGCGGCCGCCGCCGCAGCC
761	ABI3VP1_tnt.VRN1_col_a_m1	VRN1	Sorghum	5288	5316	+	-8.65672	1.33e-05	0.0253	AATTGTTCTTTTGTGTGTTTTATTTTTGC
762	REM_tnt.REM19_colamp_a_m1	REM19	Sorghum	3605	3625	-	11.6119	1.34e-05	0.0308	ACAAAAGTAAAAAAAAAAAAA
763	ABI3VP1_tnt.VRN1_colamp_a_m1	VRN1	Sorghum	4063	4081	-	10.8472	1.38e-05	0.0449	TGCAATTTTTTTTGTTTTT
764	C2C2gata_tnt.ZML2_col_a_m1	ZML2	Sorghum	4142	4160	-	8.07143	1.39e-05	0.0343	CAGCATCTTCAGCATCCTC
765	BBRBPC_tnt.BPC1_col_a_m1	BPC1	Sorghum	250	273	+	4.13636	1.43e-05	0.0348	GAGAGCACAAAAAAGAGAGAAAGA
766	REM_tnt.REM19_col_a_m1	REM19	Sorghum	4809	4823	-	12.9403	1.52e-05	0.0429	CAAAGACAAAAATCA
767	C2C2gata_tnt.ZML2_col_a_m1	ZML2	Sorghum	5543	5561	-	7.82857	1.52e-05	0.0349	CCTCTTCTTCATCAGAGTC
768	AP2EREBP_tnt.ESE1_colamp_a_m1	ESE1	Sorghum	2095	2114	-	11.5571	1.54e-05	0.0479	GGCTGCGGCGGCGGCCGCGC
769	AP2EREBP_tnt.ERF48_col_a_m1	ERF48	Sorghum	357	377	+	12.0286	1.57e-05	0.0445	GACGGCGATCTCGGCGGTTGC
770	AP2EREBP_tnt.ERF48_col_a_m1	ERF48	Sorghum	2100	2120	-	12.0286	1.57e-05	0.0445	ATTGAGGGCTGCGGCGGCGGC
771	ABI3VP1_tnt.VRN1_col_a_m1	VRN1	Sorghum	4063	4091	-	-9.79104	1.71e-05	0.0271	TTGTTTAGTTTGCAATTTTTTTTGTTTTT
772	REM_tnt.REM19_colamp_a_m1	REM19	Sorghum	2940	2960	-	11.0299	1.75e-05	0.0336	AAGTAATAAAAAAATGAAAAG
773	C2H2_tnt.TF3A_col_a_m1	TF3A	Sorghum	747	765	-	11.896	1.76e-05	0.0482	TTTTCTCCCCCTCACTCTC
774	AP2EREBP_tnt.ERF105_colamp_a_m1	ERF105	Sorghum	2083	2106	+	12.2576	1.9e-05	0.0485	TCGACCTAGCACGCGCGGCCGCCG
775	REM_tnt.REM19_col_a_m1	REM19	Sorghum	3527	3541	-	12.4179	2.02e-05	0.0497	AACAAAAACATAGAA
776	REM_tnt.REM19_colamp_a_m1	REM19	Sorghum	3609	3629	-	10.5522	2.17e-05	0.0368	GGTTACAAAAGTAAAAAAAAA
777	ABI3VP1_tnt.VRN1_col_a_m1	VRN1	Sorghum	4053	4081	-	-11.1343	2.27e-05	0.0303	TGCAATTTTTTTTGTTTTTGACTACTGTA
778	BBRBPC_tnt.BPC1_col_a_m1	BPC1	Sorghum	749	772	+	2.51515	2.44e-05	0.0494	GAGTGAGGGGGAGAAAATAAGGTC
779	C2C2gata_tnt.ZML2_col_a_m1	ZML2	Sorghum	2390	2408	-	6.45714	2.52e-05	0.0499	CATGATGATCTTCTTGATC
780	REM_tnt.REM19_colamp_a_m1	REM19	Sorghum	6663	6683	-	9.97015	2.8e-05	0.0442	ATATGAAACAAAAAAATTCGG
781	REM_tnt.REM19_colamp_a_m1	REM19	Sorghum	2937	2957	-	9.95522	2.82e-05	0.0442	TAATAAAAAAATGAAAAGATG
782	REM_tnt.REM19_colamp_a_m1	REM19	Sorghum	811	831	+	9.9403	2.84e-05	0.0442	TTCAAAAAAAATGAAAACCTT
783	ABI3VP1_tnt.VRN1_col_a_m1	VRN1	Sorghum	4058	4086	-	-12.2239	2.85e-05	0.0335	TAGTTTGCAATTTTTTTTGTTTTTGACTA
784	REM_tnt.REM19_colamp_a_m1	REM19	Sorghum	252	272	+	9.83582	2.97e-05	0.0442	GAGCACAAAAAAGAGAGAAAG
785	ABI3VP1_tnt.VRN1_col_a_m1	VRN1	Sorghum	957	985	-	-12.597	3.08e-05	0.035	ACATAGGGTTGATTTATTGTATTTTTGTG
786	ABI3VP1_tnt.VRN1_col_a_m1	VRN1	Sorghum	3594	3622	+	-12.8209	3.23e-05	0.0362	AGAATCATGGTTTTTTTTTTTTTTACTTT
787	ABI3VP1_tnt.VRN1_col_a_m1	VRN1	Sorghum	5289	5317	+	-13.0149	3.36e-05	0.0368	ATTGTTCTTTTGTGTGTTTTATTTTTGCT
788	REM_tnt.REM19_colamp_a_m1	REM19	Sorghum	3759	3779	+	9.46269	3.48e-05	0.0478	TTGAAAAAAAAAAGGAATTTT
789	ABI3VP1_tnt.VRN1_col_a_m1	VRN1	Sorghum	4059	4087	-	-13.4328	3.66e-05	0.0372	TTAGTTTGCAATTTTTTTTGTTTTTGACT
790	ABI3VP1_tnt.VRN1_col_a_m1	VRN1	Sorghum	3589	3617	+	-13.5075	3.72e-05	0.0372	GGATGAGAATCATGGTTTTTTTTTTTTTT
791	ABI3VP1_tnt.VRN1_col_a_m1	VRN1	Sorghum	2942	2970	+	-13.806	3.95e-05	0.0387	TTTCATTTTTTTATTACTTAATTTCATGT
792	ABI3VP1_tnt.VRN1_col_a_m1	VRN1	Sorghum	3526	3554	+	-13.8955	4.02e-05	0.039	TTTCTATGTTTTTGTTTCCATGTTTAGTT
793	ABI3VP1_tnt.VRN1_col_a_m1	VRN1	Sorghum	3604	3632	+	-14.2537	4.32e-05	0.0397	TTTTTTTTTTTTTTACTTTTGTAACCGGG
794	ABI3VP1_tnt.VRN1_col_a_m1	VRN1	Sorghum	3593	3621	+	-14.3134	4.37e-05	0.0397	GAGAATCATGGTTTTTTTTTTTTTTACTT
795	ABI3VP1_tnt.VRN1_col_a_m1	VRN1	Sorghum	925	953	+	-14.9254	4.94e-05	0.041	ATAAAAATTATTATTTTCTTTATTCTAAT
796	ABI3VP1_tnt.VRN1_col_a_m1	VRN1	Sorghum	3938	3966	-	-15.2388	5.26e-05	0.0416	GCAGTTAGTTTTTATTTTCGTCTATATTT
797	ABI3VP1_tnt.VRN1_col_a_m1	VRN1	Sorghum	253	281	-	-15.3433	5.37e-05	0.0416	CACCGAGCTCTTTCTCTCTTTTTTGTGCT
798	ABI3VP1_tnt.VRN1_col_a_m1	VRN1	Sorghum	2931	2959	+	-15.3582	5.39e-05	0.0416	ACAATCCATCTTTTCATTTTTTTATTACT
799	ABI3VP1_tnt.VRN1_col_a_m1	VRN1	Sorghum	2487	2515	+	-15.4776	5.51e-05	0.0416	GCGTTACTTTTCCTGTTTGTTCTTGCGCT
800	ABI3VP1_tnt.VRN1_col_a_m1	VRN1	Sorghum	4066	4094	-	-15.9552	6.06e-05	0.0427	GCCTTGTTTAGTTTGCAATTTTTTTTGTT
801	ABI3VP1_tnt.VRN1_col_a_m1	VRN1	Sorghum	4057	4085	-	-16.0896	6.22e-05	0.0427	AGTTTGCAATTTTTTTTGTTTTTGACTAC
802	ABI3VP1_tnt.VRN1_col_a_m1	VRN1	Sorghum	5292	5320	+	-16.5373	6.78e-05	0.0446	GTTCTTTTGTGTGTTTTATTTTTGCTCAC
803	ABI3VP1_tnt.VRN1_col_a_m1	VRN1	Sorghum	3146	3174	+	-17.3284	7.9e-05	0.0458	TGTGGTCGTTTAATTTATCATTTTTTATG
804	ABI3VP1_tnt.VRN1_col_a_m1	VRN1	Sorghum	3520	3548	+	-17.3731	7.97e-05	0.0458	GCAAAGTTTCTATGTTTTTGTTTCCATGT
805	ABI3VP1_tnt.VRN1_col_a_m1	VRN1	Sorghum	5131	5159	+	-17.8657	8.75e-05	0.0458	TTTTTCCCATTATATTCTTATCTTTAGAT
806	ABI3VP1_tnt.VRN1_col_a_m1	VRN1	Sorghum	3591	3619	+	-18.1194	9.19e-05	0.047	ATGAGAATCATGGTTTTTTTTTTTTTTAC
807	AP2EREBP_tnt.ERF105_col_m1	ERF105	Switchgrass	5811	5825	+	21.5152	8.54e-09	0.000845	GAGACGGCGGCGGCG
808	AP2EREBP_tnt.ERF104_col_a_m1	ERF104	Switchgrass	5813	5831	-	21.9848	1.05e-08	0.00103	CGCGGACGCCGCCGCCGTC
809	AP2EREBP_tnt.ERF105_colamp_a_m1	ERF105	Switchgrass	5815	5838	-	21.6061	1.49e-08	0.00125	CCCCGAGCGCGGACGCCGCCGCCG
810	AP2EREBP_tnt.ESE1_colamp_a_m1	ESE1	Switchgrass	5813	5832	+	21.7429	2.76e-08	0.00272	GACGGCGGCGGCGTCCGCGC
811	AP2EREBP_tnt.ERF2_col_a_m1	ERF2	Switchgrass	5812	5832	-	20.3485	5.62e-08	0.00557	GCGCGGACGCCGCCGCCGTCT
812	AP2EREBP_tnt.AT4G18450_col_a_m1	AT4G18450	Switchgrass	5814	5830	+	20.5455	5.99e-08	0.00296	ACGGCGGCGGCGTCCGC
813	BBRBPC_tnt.BPC5_colamp_a_m1	BPC5	Switchgrass	1359	1387	-	16.9634	8.11e-08	0.00387	AGAGGAGAGAGAAGAGGAGAGAGAAGAAA
814	AP2EREBP_tnt.ERF2_colamp_a_m1	ERF2	Switchgrass	5815	5835	-	19.7273	8.19e-08	0.00455	CGAGCGCGGACGCCGCCGCCG
815	AP2EREBP_tnt.ERF10_col_a_m1	ERF10	Switchgrass	5813	5833	-	19.6364	1.05e-07	0.00584	AGCGCGGACGCCGCCGCCGTC
816	AP2EREBP_tnt.ERF73_col_a_m1	ERF73	Switchgrass	5809	5829	-	19.9545	1.05e-07	0.00903	CGGACGCCGCCGCCGTCTCGG
817	AP2EREBP_tnt.ESE1_col_a_m1	ESE1	Switchgrass	5812	5826	+	19.6364	1.16e-07	0.0111	AGACGGCGGCGGCGT
818	AP2EREBP_tnt.CRF4_colamp_a_m1	CRF4	Switchgrass	5812	5826	+	19.3636	1.75e-07	0.0111	AGACGGCGGCGGCGT
819	AP2EREBP_tnt.CRF4_col_a_m1	CRF4	Switchgrass	5806	5826	-	19.2429	1.84e-07	0.00801	ACGCCGCCGCCGTCTCGGGCT
820	AP2EREBP_tnt.ERF105_colamp_a_m1	ERF105	Switchgrass	2187	2210	-	18.9848	2.06e-07	0.00339	TCGTCGACGCCTGCAGCGCCGCCT
821	AP2EREBP_tnt.ERF10_colamp_a_m1	ERF10	Switchgrass	5806	5825	+	19.0303	2.23e-07	0.0221	AGCCCGAGACGGCGGCGGCG
822	AP2EREBP_tnt.ERF5_colamp_a_m1	ERF5	Switchgrass	5806	5826	-	19	2.32e-07	0.00458	ACGCCGCCGCCGTCTCGGGCT
823	AP2EREBP_tnt.ERF104_colamp_a_m1	ERF104	Switchgrass	5812	5826	+	18.8857	2.44e-07	0.00547	AGACGGCGGCGGCGT
824	AP2EREBP_tnt.ERF73_colamp_a_m1	ERF73	Switchgrass	5811	5831	+	18.9737	2.47e-07	0.00596	GAGACGGCGGCGGCGTCCGCG
825	AP2EREBP_tnt.ERF7_col_a_m1	ERF7	Switchgrass	5812	5832	-	18.4545	2.47e-07	0.00827	GCGCGGACGCCGCCGCCGTCT
826	BBRBPC_tnt.BPC1_col_a_m1	BPC1	Switchgrass	1364	1387	-	14.2424	3.04e-07	0.00966	AGAGGAGAGAGAAGAGGAGAGAGA
827	AP2EREBP_tnt.ERF5_col_a_m1	ERF5	Switchgrass	5812	5826	-	18.4545	3.08e-07	0.0159	ACGCCGCCGCCGTCT
828	AP2EREBP_tnt.SHN3_col_a_m1	SHN3	Switchgrass	5942	5962	-	17.9155	3.17e-07	0.00534	TCCACCGCAGCTGCCTCAACC
829	C2C2gata_tnt.GATA15_col_b_m1	GATA15	Switchgrass	2284	2302	-	17.5634	3.32e-07	0.00364	CATGATGATCTTCTTGATC
830	AP2EREBP_tnt.ERF73_colamp_a_m1	ERF73	Switchgrass	2186	2206	+	18.5263	3.34e-07	0.00596	GAGGCGGCGCTGCAGGCGTCG
831	AP2EREBP_tnt.ERF73_colamp_a_m1	ERF73	Switchgrass	5814	5834	+	18.4079	3.62e-07	0.00596	ACGGCGGCGGCGTCCGCGCTC
832	AP2EREBP_tnt.ERF48_col_a_m1	ERF48	Switchgrass	5942	5962	+	18.0714	3.96e-07	0.00977	GGTTGAGGCAGCTGCGGTGGA
833	mTERF_tnt.AT5G23930_col_a_m1	AT5G23930	Switchgrass	5812	5831	-	17.9697	4.46e-07	0.0136	CGCGGACGCCGCCGCCGTCT
834	mTERF_tnt.AT5G23930_col_a_m1	AT5G23930	Switchgrass	5815	5834	-	17.8788	4.78e-07	0.0136	GAGCGCGGACGCCGCCGCCG
835	AP2EREBP_tnt.ERF7_colamp_a_m1	ERF7	Switchgrass	5814	5834	+	17.9697	4.98e-07	0.0246	ACGGCGGCGGCGTCCGCGCTC
836	BBRBPC_tnt.BPC1_col_a_m1	BPC1	Switchgrass	1362	1385	-	13.0152	5.1e-07	0.0122	AGGAGAGAGAAGAGGAGAGAGAAG
837	AP2EREBP_tnt.ESE1_colamp_a_m1	ESE1	Switchgrass	5810	5829	+	17.6571	6.05e-07	0.0118	CGAGACGGCGGCGGCGTCCG
838	AP2EREBP_tnt.ERF105_colamp_a_m1	ERF105	Switchgrass	774	797	-	17.5455	6.87e-07	0.00686	CCTCAGGACCAGCCGACGCCGCCA
839	AP2EREBP_tnt.ERF105_colamp_a_m1	ERF105	Switchgrass	5812	5835	-	17.5303	6.95e-07	0.00686	CGAGCGCGGACGCCGCCGCCGTCT
840	AP2EREBP_tnt.AT4G18450_col_a_m1	AT4G18450	Switchgrass	5811	5827	+	17.6212	7.4e-07	0.0146	GAGACGGCGGCGGCGTC
841	AP2EREBP_tnt.ERF105_colamp_a_m1	ERF105	Switchgrass	2081	2104	+	17.3182	8.19e-07	0.0069	GCCCCGGTTCCCCTCGCGCCGCCG
842	BBRBPC_tnt.BPC5_colamp_a_m1	BPC5	Switchgrass	1363	1391	-	10.9756	8.35e-07	0.0114	ATGTAGAGGAGAGAGAAGAGGAGAGAGAA
843	AP2EREBP_tnt.ESE1_colamp_a_m1	ESE1	Switchgrass	2185	2204	+	17.1429	8.38e-07	0.0118	CGAGGCGGCGCTGCAGGCGT
844	AP2EREBP_tnt.CRF4_col_a_m1	CRF4	Switchgrass	5803	5823	-	16.8857	9.35e-07	0.0132	CCGCCGCCGTCTCGGGCTCTC
845	mTERF_tnt.AT5G23930_col_a_m1	AT5G23930	Switchgrass	2187	2206	-	16.9242	9.62e-07	0.0136	CGACGCCTGCAGCGCCGCCT
846	AP2EREBP_tnt.ERF5_colamp_a_m1	ERF5	Switchgrass	5809	5829	-	17.2121	9.8e-07	0.0161	CGGACGCCGCCGCCGTCTCGG
847	AP2EREBP_tnt.ERF2_colamp_a_m1	ERF2	Switchgrass	2187	2207	-	17.1061	9.95e-07	0.0133	TCGACGCCTGCAGCGCCGCCT
848	AP2EREBP_tnt.ERF7_colamp_a_m1	ERF7	Switchgrass	2085	2105	-	17.0909	1.08e-06	0.0273	ACGGCGGCGCGAGGGGAACCG
849	AP2EREBP_tnt.CRF4_colamp_a_m1	CRF4	Switchgrass	5815	5829	+	16.8636	1.12e-06	0.0191	CGGCGGCGGCGTCCG
850	MYBrelated_tnt.AT1G72740_col_a_m1	AT1G72740	Switchgrass	2060	2074	+	17.2714	1.14e-06	0.0282	CCGGAACCCTAACTC
851	AP2EREBP_tnt.ERF7_col_a_m1	ERF7	Switchgrass	2187	2207	-	16.5152	1.2e-06	0.016	TCGACGCCTGCAGCGCCGCCT
852	AP2EREBP_tnt.ERF2_colamp_a_m1	ERF2	Switchgrass	2084	2104	+	16.8636	1.21e-06	0.0133	CCGGTTCCCCTCGCGCCGCCG
853	AP2EREBP_tnt.ERF2_col_a_m1	ERF2	Switchgrass	5815	5835	-	16.7424	1.22e-06	0.0173	CGAGCGCGGACGCCGCCGCCG
854	C2H2_tnt.TF3A_col_a_m1	TF3A	Switchgrass	1368	1386	+	16.176	1.29e-06	0.0295	TCTCCTCTTCTCTCTCCTC
855	AP2EREBP_tnt.AT4G18450_col_a_m1	AT4G18450	Switchgrass	2186	2202	+	16.7879	1.33e-06	0.0146	GAGGCGGCGCTGCAGGC
856	BBRBPC_tnt.BPC1_col_a_m1	BPC1	Switchgrass	1360	1383	-	10.6364	1.33e-06	0.0124	GAGAGAGAAGAGGAGAGAGAAGAA
857	AP2EREBP_tnt.ESE1_colamp_a_m1	ESE1	Switchgrass	5544	5563	-	16.3571	1.35e-06	0.0159	GGAGACGGCGAGGGTGGCTG
858	AP2EREBP_tnt.ERF2_colamp_a_m1	ERF2	Switchgrass	5812	5832	-	16.697	1.38e-06	0.0136	GCGCGGACGCCGCCGCCGTCT
859	AP2EREBP_tnt.ERF104_col_a_m1	ERF104	Switchgrass	2185	2203	-	16.5758	1.41e-06	0.0155	CGCCTGCAGCGCCGCCTCG
860	AP2EREBP_tnt.SHN3_col_a_m1	SHN3	Switchgrass	5813	5833	-	15.169	1.48e-06	0.0161	AGCGCGGACGCCGCCGCCGTC
861	AP2EREBP_tnt.ERF48_col_a_m1	ERF48	Switchgrass	5804	5824	+	16.0143	1.58e-06	0.0223	AGAGCCCGAGACGGCGGCGGC
862	AP2EREBP_tnt.ERF104_col_a_m1	ERF104	Switchgrass	5810	5828	-	16.4091	1.59e-06	0.0157	GGACGCCGCCGCCGTCTCG
863	AP2EREBP_tnt.ERF7_colamp_a_m1	ERF7	Switchgrass	5811	5831	+	16.6061	1.59e-06	0.0315	GAGACGGCGGCGGCGTCCGCG
864	C2H2_tnt.TF3A_col_a_m1	TF3A	Switchgrass	1371	1389	+	15.776	1.68e-06	0.0295	CCTCTTCTCTCTCCTCTAC
865	HMG_tnt.3XHMGBOX1_col_a_m1	3XHMGBOX1	Switchgrass	2186	2206	+	15.7143	1.69e-06	0.0226	GAGGCGGCGCTGCAGGCGTCG
866	AP2EREBP_tnt.ERF104_colamp_a_m1	ERF104	Switchgrass	771	785	+	16.4857	1.76e-06	0.0236	TCGTGGCGGCGTCGG
867	AP2EREBP_tnt.ERF5_col_a_m1	ERF5	Switchgrass	5815	5829	-	16.0152	1.88e-06	0.0271	CGGACGCCGCCGCCG
868	AP2EREBP_tnt.CRF4_col_a_m1	CRF4	Switchgrass	2178	2198	-	15.7429	1.91e-06	0.0171	GCAGCGCCGCCTCGTACTCCT
869	AP2EREBP_tnt.ERF104_colamp_a_m1	ERF104	Switchgrass	5815	5829	+	16.3714	1.91e-06	0.0236	CGGCGGCGGCGTCCG
870	AP2EREBP_tnt.ERF10_col_a_m1	ERF10	Switchgrass	5810	5830	-	16.1667	1.91e-06	0.0211	GCGGACGCCGCCGCCGTCTCG
871	AP2EREBP_tnt.ERF2_colamp_a_m1	ERF2	Switchgrass	774	794	-	16.1667	2.06e-06	0.017	CAGGACCAGCCGACGCCGCCA
872	AP2EREBP_tnt.CRF4_colamp_a_m1	CRF4	Switchgrass	771	785	+	15.7879	2.27e-06	0.0281	TCGTGGCGGCGTCGG
873	AP2EREBP_tnt.SHN3_col_a_m1	SHN3	Switchgrass	5543	5563	+	14.3099	2.33e-06	0.0207	TCAGCCACCCTCGCCGTCTCC
874	HMG_tnt.3XHMGBOX1_col_a_m1	3XHMGBOX1	Switchgrass	5814	5834	+	15.3571	2.35e-06	0.0232	ACGGCGGCGGCGTCCGCGCTC
875	BBRBPC_tnt.BPC1_col_a_m1	BPC1	Switchgrass	1358	1381	-	9.12121	2.4e-06	0.015	GAGAGAAGAGGAGAGAGAAGAAAG
876	AP2EREBP_tnt.ESE1_col_a_m1	ESE1	Switchgrass	5809	5823	+	15.8788	2.42e-06	0.0399	CCGAGACGGCGGCGG
877	AP2EREBP_tnt.ERF2_col_a_m1	ERF2	Switchgrass	5809	5829	-	15.6818	2.56e-06	0.0241	CGGACGCCGCCGCCGTCTCGG
878	AP2EREBP_tnt.ERF48_col_a_m1	ERF48	Switchgrass	5543	5563	-	15.1857	2.65e-06	0.0283	GGAGACGGCGAGGGTGGCTGA
879	LOBAS2_tnt.LOB_col_a_m1	LOB	Switchgrass	5942	5962	-	15.1515	2.67e-06	0.0343	TCCACCGCAGCTGCCTCAACC
880	AP2EREBP_tnt.AT4G18450_col_a_m1	AT4G18450	Switchgrass	2089	2105	-	15.6818	2.68e-06	0.0221	ACGGCGGCGCGAGGGGA
881	AP2EREBP_tnt.ERF10_col_a_m1	ERF10	Switchgrass	2185	2205	-	15.6364	2.76e-06	0.0211	GACGCCTGCAGCGCCGCCTCG
882	LOBAS2_tnt.LOB_col_a_m1	LOB	Switchgrass	5804	5824	-	15.0758	2.8e-06	0.0343	GCCGCCGCCGTCTCGGGCTCT
883	AP2EREBP_tnt.ERF104_col_a_m1	ERF104	Switchgrass	772	790	-	15.5606	2.82e-06	0.0199	ACCAGCCGACGCCGCCACG
884	AP2EREBP_tnt.ERF10_col_a_m1	ERF10	Switchgrass	5543	5563	+	15.5152	2.99e-06	0.0211	TCAGCCACCCTCGCCGTCTCC
885	AP2EREBP_tnt.ERF2_col_a_m1	ERF2	Switchgrass	2184	2204	-	15.4394	3.01e-06	0.0241	ACGCCTGCAGCGCCGCCTCGT
886	AP2EREBP_tnt.ERF105_colamp_a_m1	ERF105	Switchgrass	5818	5841	-	15.4545	3.05e-06	0.0167	AGGCCCCGAGCGCGGACGCCGCCG
887	REM_tnt.REM19_colamp_a_m1	REM19	Switchgrass	4826	4846	-	14.5821	3.1e-06	0.0182	ATTGGAAAAAAAAACATAAAC
888	ABI3VP1_tnt.VRN1_col_a_m1	VRN1	Switchgrass	4818	4846	+	-2.44776	3.16e-06	0.0161	ATTCTCATGTTTATGTTTTTTTTTCCAAT
889	AP2EREBP_tnt.ERF2_col_a_m1	ERF2	Switchgrass	771	791	-	15.3636	3.16e-06	0.0241	GACCAGCCGACGCCGCCACGA
890	AP2EREBP_tnt.AT4G18450_col_a_m1	AT4G18450	Switchgrass	773	789	+	15.3485	3.27e-06	0.0231	GTGGCGGCGTCGGCTGG
891	REM_tnt.REM19_col_a_m1	REM19	Switchgrass	4828	4842	-	15.4179	3.36e-06	0.0202	GAAAAAAAAACATAA
892	AP2EREBP_tnt.ERF7_colamp_a_m1	ERF7	Switchgrass	2186	2206	+	15.5909	3.37e-06	0.0333	GAGGCGGCGCTGCAGGCGTCG
893	BBRBPC_tnt.BPC5_colamp_a_m1	BPC5	Switchgrass	1369	1397	-	6.82927	3.42e-06	0.0251	AATCCTATGTAGAGGAGAGAGAAGAGGAG
894	AP2EREBP_tnt.ERF104_col_a_m1	ERF104	Switchgrass	5545	5563	+	15.2576	3.43e-06	0.0226	AGCCACCCTCGCCGTCTCC
895	C2H2_tnt.TF3A_col_a_m1	TF3A	Switchgrass	2004	2022	+	14.624	3.5e-06	0.0295	CCCCCCCCCCCACCCCCAC
896	AP2EREBP_tnt.ERF104_colamp_a_m1	ERF104	Switchgrass	5809	5823	+	15.4429	3.52e-06	0.0275	CCGAGACGGCGGCGG
897	BBRBPC_tnt.BPC1_colamp_a_m1	BPC1	Switchgrass	4440	4454	+	13.697	3.66e-06	0.0401	CAATCTCTCTCTTTT
898	LOBAS2_tnt.LOB_col_a_m1	LOB	Switchgrass	2197	2217	-	14.6061	3.73e-06	0.0343	TACACCGTCGTCGACGCCTGC
899	AP2EREBP_tnt.SHN3_col_a_m1	SHN3	Switchgrass	5804	5824	-	13.1972	4.11e-06	0.0252	GCCGCCGCCGTCTCGGGCTCT
900	AP2EREBP_tnt.ERF10_col_a_m1	ERF10	Switchgrass	772	792	-	14.9394	4.36e-06	0.0254	GGACCAGCCGACGCCGCCACG
901	AP2EREBP_tnt.ERF73_colamp_a_m1	ERF73	Switchgrass	773	793	+	14.0658	4.46e-06	0.0311	GTGGCGGCGTCGGCTGGTCCT
902	AP2EREBP_tnt.ERF104_col_a_m1	ERF104	Switchgrass	5816	5834	-	14.7576	4.68e-06	0.0257	GAGCGCGGACGCCGCCGCC
903	AP2EREBP_tnt.ERF73_colamp_a_m1	ERF73	Switchgrass	2085	2105	-	13.9211	4.8e-06	0.0311	ACGGCGGCGCGAGGGGAACCG
904	AP2EREBP_tnt.ERF10_col_a_m1	ERF10	Switchgrass	2086	2106	+	14.7879	4.8e-06	0.0264	GGTTCCCCTCGCGCCGCCGTG
905	LOBAS2_tnt.LOB_col_a_m1	LOB	Switchgrass	5884	5904	+	14.1667	4.85e-06	0.0343	TACACCACCGGCACCGGCGCG
906	C2H2_tnt.TF3A_col_a_m1	TF3A	Switchgrass	1359	1377	+	14.008	5.12e-06	0.0295	TTTCTTCTCTCTCCTCTTC
907	AP2EREBP_tnt.ERF7_col_a_m1	ERF7	Switchgrass	5541	5561	+	14.4848	5.12e-06	0.0338	CTTCAGCCACCCTCGCCGTCT
908	LOBAS2_tnt.LOB_col_a_m1	LOB	Switchgrass	2173	2193	-	14.0455	5.22e-06	0.0343	GCCGCCTCGTACTCCTCCTGC
909	BBRBPC_tnt.BPC5_col_a_m1	BPC5	Switchgrass	1127	1156	-	-32	5.23e-06	0.0297	TGAGATAGTGGCATGTAGGCAGAGAGAGAA
910	ABI3VP1_tnt.VRN1_col_a_m1	VRN1	Switchgrass	4819	4847	+	-4.80597	5.56e-06	0.0178	TTCTCATGTTTATGTTTTTTTTTCCAATC
911	BBRBPC_tnt.BPC5_colamp_a_m1	BPC5	Switchgrass	1357	1385	-	5.2561	5.63e-06	0.0283	AGGAGAGAGAAGAGGAGAGAGAAGAAAGT
912	HMG_tnt.3XHMGBOX1_col_a_m1	3XHMGBOX1	Switchgrass	2085	2105	-	14.3429	5.69e-06	0.0338	ACGGCGGCGCGAGGGGAACCG
913	AP2EREBP_tnt.ERF7_colamp_a_m1	ERF7	Switchgrass	773	793	+	14.7879	5.72e-06	0.0404	GTGGCGGCGTCGGCTGGTCCT
914	AP2EREBP_tnt.ERF5_col_a_m1	ERF5	Switchgrass	774	788	-	14.2727	5.79e-06	0.0477	CAGCCGACGCCGCCA
915	mTERF_tnt.AT5G23930_col_a_m1	AT5G23930	Switchgrass	5542	5561	+	14.1667	5.87e-06	0.0305	TTCAGCCACCCTCGCCGTCT
916	AP2EREBP_tnt.ERF73_col_a_m1	ERF73	Switchgrass	5812	5832	-	14.2424	5.9e-06	0.0483	GCGCGGACGCCGCCGCCGTCT
917	C2H2_tnt.TF3A_col_a_m1	TF3A	Switchgrass	1365	1383	+	13.768	5.92e-06	0.0295	CTCTCTCCTCTTCTCTCTC
918	AP2EREBP_tnt.ERF5_colamp_a_m1	ERF5	Switchgrass	5803	5823	-	14.303	6.24e-06	0.0421	CCGCCGCCGTCTCGGGCTCTC
919	BBRBPC_tnt.BPC1_col_a_m1	BPC1	Switchgrass	1366	1389	-	6.43939	6.42e-06	0.0211	GTAGAGGAGAGAGAAGAGGAGAGA
920	AP2EREBP_tnt.ERF73_col_a_m1	ERF73	Switchgrass	2181	2201	-	14.0455	6.57e-06	0.0483	CCTGCAGCGCCGCCTCGTACT
921	AP2EREBP_tnt.ERF10_col_a_m1	ERF10	Switchgrass	5816	5836	-	14.2727	6.61e-06	0.0323	CCGAGCGCGGACGCCGCCGCC
922	BBRBPC_tnt.BPC1_colamp_a_m1	BPC1	Switchgrass	1359	1373	+	12.3485	6.68e-06	0.0458	TTTCTTCTCTCTCCT
923	LOBAS2_tnt.LOB_col_a_m1	LOB	Switchgrass	2185	2205	-	13.5152	7.1e-06	0.0383	GACGCCTGCAGCGCCGCCTCG
924	AP2EREBP_tnt.ERF105_colamp_a_m1	ERF105	Switchgrass	5538	5561	+	14.0758	7.11e-06	0.0305	GTGCTTCAGCCACCCTCGCCGTCT
925	AP2EREBP_tnt.ERF5_colamp_a_m1	ERF5	Switchgrass	2178	2198	-	14.0303	7.24e-06	0.0421	GCAGCGCCGCCTCGTACTCCT
926	AP2EREBP_tnt.ERF5_col_a_m1	ERF5	Switchgrass	771	785	-	13.8182	7.62e-06	0.0477	CCGACGCCGCCACGA
927	AP2EREBP_tnt.ERF5_col_a_m1	ERF5	Switchgrass	2187	2201	-	13.803	7.69e-06	0.0477	CCTGCAGCGCCGCCT
928	AP2EREBP_tnt.SHN3_col_a_m1	SHN3	Switchgrass	2188	2208	-	11.9155	7.72e-06	0.0305	GTCGACGCCTGCAGCGCCGCC
929	AP2EREBP_tnt.ERF2_colamp_a_m1	ERF2	Switchgrass	5541	5561	+	14.0909	7.97e-06	0.0482	CTTCAGCCACCCTCGCCGTCT
930	AP2EREBP_tnt.ERF2_colamp_a_m1	ERF2	Switchgrass	5818	5838	-	14.0758	8.04e-06	0.0482	CCCCGAGCGCGGACGCCGCCG
931	AP2EREBP_tnt.ESE1_colamp_a_m1	ESE1	Switchgrass	2087	2106	-	12.9429	8.21e-06	0.0368	CACGGCGGCGCGAGGGGAAC
932	REM_tnt.REM19_colamp_a_m1	REM19	Switchgrass	4827	4847	-	12.5821	8.48e-06	0.0249	GATTGGAAAAAAAAACATAAA
933	AP2EREBP_tnt.ERF7_col_a_m1	ERF7	Switchgrass	5815	5835	-	13.697	8.6e-06	0.0406	CGAGCGCGGACGCCGCCGCCG
934	AP2EREBP_tnt.AT4G18450_col_a_m1	AT4G18450	Switchgrass	5546	5562	-	13.5303	8.74e-06	0.0455	GAGACGGCGAGGGTGGC
935	AP2EREBP_tnt.SHN3_col_a_m1	SHN3	Switchgrass	5810	5830	-	11.6479	8.78e-06	0.0305	GCGGACGCCGCCGCCGTCTCG
936	BBRBPC_tnt.BPC1_colamp_a_m1	BPC1	Switchgrass	1371	1385	+	11.6364	9.05e-06	0.0482	CCTCTTCTCTCTCCT
937	mTERF_tnt.AT5G23930_col_a_m1	AT5G23930	Switchgrass	774	793	-	13.3485	9.51e-06	0.0408	AGGACCAGCCGACGCCGCCA
938	AP2EREBP_tnt.SHN3_col_a_m1	SHN3	Switchgrass	2176	2196	-	11.4789	9.51e-06	0.0305	AGCGCCGCCTCGTACTCCTCC
939	REM_tnt.REM19_colamp_a_m1	REM19	Switchgrass	4824	4844	-	12.3284	9.58e-06	0.0258	TGGAAAAAAAAACATAAACAT
940	AP2EREBP_tnt.ERF104_col_a_m1	ERF104	Switchgrass	2088	2106	+	13.4848	9.81e-06	0.0414	TTCCCCTCGCGCCGCCGTG
941	BBRBPC_tnt.BPC1_col_a_m1	BPC1	Switchgrass	1356	1379	-	5.21212	9.87e-06	0.0285	GAGAAGAGGAGAGAGAAGAAAGTG
942	C2C2gata_tnt.ZML2_col_a_m1	ZML2	Switchgrass	5079	5097	-	8.95714	9.93e-06	0.0316	CGTCTTCCTCATCAGAGTC
943	AP2EREBP_tnt.AT4G18450_col_a_m1	AT4G18450	Switchgrass	5817	5833	+	13.197	1.03e-05	0.0485	GCGGCGGCGTCCGCGCT
944	REM_tnt.REM19_colamp_a_m1	REM19	Switchgrass	3342	3362	-	12.1493	1.04e-05	0.0265	ATGGAAACAAAAAAAGATAGA
945	AP2EREBP_tnt.SHN3_col_a_m1	SHN3	Switchgrass	5884	5904	+	11.2817	1.04e-05	0.0309	TACACCACCGGCACCGGCGCG
946	AP2EREBP_tnt.CRF4_col_a_m1	CRF4	Switchgrass	5944	5964	-	12.6429	1.07e-05	0.0406	GTTCCACCGCAGCTGCCTCAA
947	mTERF_tnt.AT5G23930_col_a_m1	AT5G23930	Switchgrass	5941	5960	-	13.1212	1.08e-05	0.0418	CACCGCAGCTGCCTCAACCG
948	ABI3VP1_tnt.VRN1_col_a_m1	VRN1	Switchgrass	2778	2806	+	-7.76119	1.09e-05	0.0243	CCTTTTAATTGTTTGCTTGTTTTTATGTA
949	AP2EREBP_tnt.ERF73_colamp_a_m1	ERF73	Switchgrass	5817	5837	+	12.1579	1.12e-05	0.0472	GCGGCGGCGTCCGCGCTCGGG
950	LOBAS2_tnt.LOB_col_a_m1	LOB	Switchgrass	5807	5827	-	12.6364	1.17e-05	0.04	GACGCCGCCGCCGTCTCGGGC
951	ABI3VP1_tnt.VRN1_colamp_a_m1	VRN1	Switchgrass	911	929	-	11.2222	1.2e-05	0.0428	CACGATTTTTTTTTGCGAG
952	AP2EREBP_tnt.ERF10_col_a_m1	ERF10	Switchgrass	5951	5971	-	13.2424	1.2e-05	0.0476	GCCACCCGTTCCACCGCAGCT
953	LOBAS2_tnt.LOB_col_a_m1	LOB	Switchgrass	5540	5560	+	12.5606	1.22e-05	0.04	GCTTCAGCCACCCTCGCCGTC
954	AP2EREBP_tnt.CRF4_col_a_m1	CRF4	Switchgrass	5111	5131	+	12.3714	1.23e-05	0.0448	GAGGCGCCGTCGCTGAACCTG
955	mTERF_tnt.AT5G23930_col_a_m1	AT5G23930	Switchgrass	2085	2104	+	12.8939	1.23e-05	0.0434	CGGTTCCCCTCGCGCCGCCG
956	C2C2gata_tnt.ZML1_col_a_m1	ZML1	Switchgrass	3157	3171	-	7.93939	1.26e-05	0.0455	TCATCGACAACATCA
957	C2C2gata_tnt.ZML1_col_a_m1	ZML1	Switchgrass	3370	3384	-	7.93939	1.26e-05	0.0455	TCATCGACAACATCA
958	REM_tnt.REM19_col_a_m1	REM19	Switchgrass	3913	3927	-	13.209	1.3e-05	0.0429	GAAAGAAACAAACAA
959	AP2EREBP_tnt.ESE1_colamp_a_m1	ESE1	Switchgrass	5816	5835	+	11.9429	1.3e-05	0.0476	GGCGGCGGCGTCCGCGCTCG
960	AP2EREBP_tnt.ERF48_col_a_m1	ERF48	Switchgrass	5884	5904	-	12.3429	1.34e-05	0.0435	CGCGCCGGTGCCGGTGGTGTA
961	REM_tnt.REM19_col_a_m1	REM19	Switchgrass	4826	4840	-	13.1194	1.37e-05	0.0429	AAAAAAAACATAAAC
962	AP2EREBP_tnt.ERF48_col_a_m1	ERF48	Switchgrass	4275	4295	-	12.2857	1.38e-05	0.0435	GGAGGTGGAGCATTTGGTTGA
963	C2C2gata_tnt.ZML2_col_a_m1	ZML2	Switchgrass	3723	3741	-	8.07143	1.39e-05	0.0343	CAGCATCTTCAGCATCCTC
964	REM_tnt.REM19_col_a_m1	REM19	Switchgrass	913	927	+	13.0746	1.41e-05	0.0429	CGCAAAAAAAAATCG
965	C2H2_tnt.TF3A_col_a_m1	TF3A	Switchgrass	2001	2019	+	12.288	1.41e-05	0.0458	CCCCCCCCCCCCCCACCCC
966	ABI3VP1_tnt.VRN1_colamp_a_m1	VRN1	Switchgrass	4826	4844	+	10.75	1.43e-05	0.045	GTTTATGTTTTTTTTTCCA
967	AP2EREBP_tnt.ERF48_col_a_m1	ERF48	Switchgrass	2188	2208	+	12.1857	1.45e-05	0.0435	GGCGGCGCTGCAGGCGTCGAC
968	REM_tnt.REM19_col_a_m1	REM19	Switchgrass	3343	3357	-	12.9851	1.48e-05	0.0429	AACAAAAAAAGATAG
969	AP2EREBP_tnt.ESE1_colamp_a_m1	ESE1	Switchgrass	772	791	+	11.6143	1.51e-05	0.0479	CGTGGCGGCGTCGGCTGGTC
970	mTERF_tnt.AT5G23930_col_a_m1	AT5G23930	Switchgrass	5938	5957	-	12.5152	1.52e-05	0.0478	CGCAGCTGCCTCAACCGCTG
971	C2H2_tnt.TF3A_col_a_m1	TF3A	Switchgrass	2174	2192	-	12.144	1.53e-05	0.0458	CCGCCTCGTACTCCTCCTG
972	REM_tnt.REM19_colamp_a_m1	REM19	Switchgrass	3341	3361	-	11.1194	1.68e-05	0.0336	TGGAAACAAAAAAAGATAGAC
973	AP2EREBP_tnt.ESE1_colamp_a_m1	ESE1	Switchgrass	5991	6010	+	11.3429	1.69e-05	0.0495	CGTGGCGGCGCTCACCACGT
974	LOBAS2_tnt.LOB_col_a_m1	LOB	Switchgrass	2188	2208	-	11.803	1.84e-05	0.0469	GTCGACGCCTGCAGCGCCGCC
975	BBRBPC_tnt.BPC1_col_a_m1	BPC1	Switchgrass	1802	1825	-	3.31818	1.87e-05	0.0435	GAGGGAGAGAGTAGGGGTTAAAAT
976	ABI3VP1_tnt.VRN1_col_a_m1	VRN1	Switchgrass	4814	4842	+	-10.4925	1.98e-05	0.0285	ACTTATTCTCATGTTTATGTTTTTTTTTC
977	AP2EREBP_tnt.ERF105_colamp_a_m1	ERF105	Switchgrass	2190	2213	-	12.1515	2.01e-05	0.0485	CCGTCGTCGACGCCTGCAGCGCCG
978	AP2EREBP_tnt.ERF105_colamp_a_m1	ERF105	Switchgrass	5993	6016	-	12.1061	2.05e-05	0.0485	CGGAGTACGTGGTGAGCGCCGCCA
979	REM_tnt.REM19_colamp_a_m1	REM19	Switchgrass	3343	3363	-	10.4925	2.23e-05	0.0368	CATGGAAACAAAAAAAGATAG
980	BBRBPC_tnt.BPC1_col_a_m1	BPC1	Switchgrass	1804	1827	-	2.78788	2.23e-05	0.0464	AGGAGGGAGAGAGTAGGGGTTAAA
981	BBRBPC_tnt.BPC1_col_a_m1	BPC1	Switchgrass	1368	1391	-	2.77273	2.24e-05	0.0464	ATGTAGAGGAGAGAGAAGAGGAGA
982	AP2EREBP_tnt.SHN3_col_a_m1	SHN3	Switchgrass	2179	2199	-	9.59155	2.27e-05	0.0461	TGCAGCGCCGCCTCGTACTCC
983	C2C2gata_tnt.ZML2_col_a_m1	ZML2	Switchgrass	2284	2302	-	6.45714	2.52e-05	0.0499	CATGATGATCTTCTTGATC
984	ABI3VP1_tnt.VRN1_col_a_m1	VRN1	Switchgrass	2475	2503	+	-11.6866	2.55e-05	0.0326	TAGATGGCTTTCTAATTCTTTTTATGTAT
985	ABI3VP1_tnt.VRN1_col_a_m1	VRN1	Switchgrass	3331	3359	+	-11.8358	2.63e-05	0.0327	CTGTTGAAAAGTCTATCTTTTTTTGTTTC
986	AP2EREBP_tnt.SHN3_col_a_m1	SHN3	Switchgrass	5948	5968	-	9.01408	2.93e-05	0.0484	ACCCGTTCCACCGCAGCTGCC
987	ABI3VP1_tnt.VRN1_col_a_m1	VRN1	Switchgrass	6634	6662	-	-12.5224	3.04e-05	0.0349	CTCAACCATTTCCGTTTTCGTTTTTTATT
988	ABI3VP1_tnt.VRN1_col_a_m1	VRN1	Switchgrass	4816	4844	+	-14.209	4.28e-05	0.0397	TTATTCTCATGTTTATGTTTTTTTTTCCA
989	ABI3VP1_tnt.VRN1_col_a_m1	VRN1	Switchgrass	2776	2804	+	-14.597	4.63e-05	0.041	TACCTTTTAATTGTTTGCTTGTTTTTATG
990	ABI3VP1_tnt.VRN1_col_a_m1	VRN1	Switchgrass	3336	3364	+	-15.6866	5.75e-05	0.0421	GAAAAGTCTATCTTTTTTTGTTTCCATGT
991	ABI3VP1_tnt.VRN1_col_a_m1	VRN1	Switchgrass	2791	2819	+	-15.9851	6.09e-05	0.0427	TGCTTGTTTTTATGTACTCTGTTTTAGTG
992	ABI3VP1_tnt.VRN1_col_a_m1	VRN1	Switchgrass	6327	6355	-	-16.8806	7.25e-05	0.0457	GCCTATTTATTTTTTTCCGGATTTTATAA
993	ABI3VP1_tnt.VRN1_col_a_m1	VRN1	Switchgrass	2492	2520	+	-17.0896	7.55e-05	0.0458	CTTTTTATGTATTGATTTGATTTTTCAGT
994	ABI3VP1_tnt.VRN1_col_a_m1	VRN1	Switchgrass	6628	6656	-	-17.2985	7.86e-05	0.0458	CATTTCCGTTTTCGTTTTTTATTACGGAA
995	ABI3VP1_tnt.VRN1_col_a_m1	VRN1	Switchgrass	4375	4403	+	-17.3134	7.88e-05	0.0458	ATAGTTTTACTACTTTTCTATTCTGTTAC
996	ABI3VP1_tnt.VRN1_col_a_m1	VRN1	Switchgrass	5640	5668	-	-17.3881	7.99e-05	0.0458	TTCTCATGATGTATATTCCTTTTTGATAC
997	ABI3VP1_tnt.VRN1_col_a_m1	VRN1	Switchgrass	4812	4840	+	-17.806	8.66e-05	0.0458	AAACTTATTCTCATGTTTATGTTTTTTTT
998	ABI3VP1_tnt.VRN1_col_a_m1	VRN1	Switchgrass	2777	2805	+	-17.9104	8.83e-05	0.0458	ACCTTTTAATTGTTTGCTTGTTTTTATGT
999	ABI3VP1_tnt.VRN1_col_a_m1	VRN1	Switchgrass	2487	2515	+	-18.1493	9.24e-05	0.047	TAATTCTTTTTATGTATTGATTTGATTTT
1000	REM_tnt.REM19_col_a_m1	REM19	Setaria	4515	4529	-	19.194	1.53e-07	0.00523	GACAAAAAAAAAAGA
1001	BBRBPC_tnt.BPC5_colamp_a_m1	BPC5	Setaria	1566	1594	-	15.0122	1.81e-07	0.00522	GAGGAAAAGTGGAAAGGAGAGAGAGGGGG
1002	AP2EREBP_tnt.ERF105_colamp_a_m1	ERF105	Setaria	2267	2290	-	18.9848	2.06e-07	0.00339	TCGTCGACGCCTGCAGCGCCGCCT
1003	ABI3VP1_tnt.VRN1_colamp_a_m1	VRN1	Setaria	4514	4532	+	19	2.83e-07	0.00792	CTCTTTTTTTTTTGTCTAT
1004	C2C2gata_tnt.GATA15_col_b_m1	GATA15	Setaria	2364	2382	-	17.5634	3.32e-07	0.00364	CATGATGATCTTCTTGATC
1005	AP2EREBP_tnt.ERF73_colamp_a_m1	ERF73	Setaria	2266	2286	+	18.5263	3.34e-07	0.00596	GAGGCGGCGCTGCAGGCGTCG
1006	REM_tnt.REM19_col_a_m1	REM19	Setaria	3374	3388	-	17.791	5.43e-07	0.00745	CCCAAAAAAAAAAAG
1007	BBRBPC_tnt.BPC5_colamp_a_m1	BPC5	Setaria	1570	1598	-	11.7317	6.35e-07	0.0101	GCTTGAGGAAAAGTGGAAAGGAGAGAGAG
1008	AP2EREBP_tnt.ESE1_colamp_a_m1	ESE1	Setaria	2265	2284	+	17.1429	8.38e-07	0.0118	CGAGGCGGCGCTGCAGGCGT
1009	AP2EREBP_tnt.ERF105_colamp_a_m1	ERF105	Setaria	5912	5935	+	17.2424	8.68e-07	0.0069	CCGTCCTCGCCCGCGCCGCAGCCG
1010	mTERF_tnt.AT5G23930_col_a_m1	AT5G23930	Setaria	2267	2286	-	16.9242	9.62e-07	0.0136	CGACGCCTGCAGCGCCGCCT
1011	AP2EREBP_tnt.ERF2_colamp_a_m1	ERF2	Setaria	2267	2287	-	17.1061	9.95e-07	0.0133	TCGACGCCTGCAGCGCCGCCT
1012	AP2EREBP_tnt.ERF7_col_a_m1	ERF7	Setaria	2267	2287	-	16.5152	1.2e-06	0.016	TCGACGCCTGCAGCGCCGCCT
1013	mTERF_tnt.AT5G23930_col_a_m1	AT5G23930	Setaria	5916	5935	+	16.5758	1.23e-06	0.0145	CCTCGCCCGCGCCGCAGCCG
1014	BBRBPC_tnt.BPC1_colamp_a_m1	BPC1	Setaria	1566	1580	+	15.8485	1.28e-06	0.0297	CCCCCTCTCTCTCCT
1015	AP2EREBP_tnt.AT4G18450_col_a_m1	AT4G18450	Setaria	2266	2282	+	16.7879	1.33e-06	0.0146	GAGGCGGCGCTGCAGGC
1016	REM_tnt.REM19_colamp_a_m1	REM19	Setaria	4511	4531	-	16.1045	1.35e-06	0.0129	TAGACAAAAAAAAAAGAGGTT
1017	AP2EREBP_tnt.ERF104_col_a_m1	ERF104	Setaria	2265	2283	-	16.5758	1.41e-06	0.0155	CGCCTGCAGCGCCGCCTCG
1018	AP2EREBP_tnt.ESE1_colamp_a_m1	ESE1	Setaria	5918	5937	-	16.1714	1.5e-06	0.0159	CGCGGCTGCGGCGCGGGCGA
1019	BBRBPC_tnt.BPC1_col_a_m1	BPC1	Setaria	1571	1594	-	10.1667	1.6e-06	0.0124	GAGGAAAAGTGGAAAGGAGAGAGA
1020	HMG_tnt.3XHMGBOX1_col_a_m1	3XHMGBOX1	Setaria	2266	2286	+	15.7143	1.69e-06	0.0226	GAGGCGGCGCTGCAGGCGTCG
1021	MYBrelated_tnt.AT1G72740_colamp_a_m1	AT1G72740	Setaria	2148	2168	-	16.7273	1.7e-06	0.0378	GCGAGGGGGATTAGGGTTTCC
1022	MYBrelated_tnt.AT1G72740_col_a_m1	AT1G72740	Setaria	2147	2161	+	16.6286	1.76e-06	0.0349	GGGAAACCCTAATCC
1023	REM_tnt.REM19_colamp_a_m1	REM19	Setaria	4512	4532	-	15.6119	1.78e-06	0.0129	ATAGACAAAAAAAAAAGAGGT
1024	AP2EREBP_tnt.CRF4_col_a_m1	CRF4	Setaria	2258	2278	-	15.7429	1.91e-06	0.0171	GCAGCGCCGCCTCGTACTCCT
1025	REM_tnt.REM19_col_a_m1	REM19	Setaria	4514	4528	-	16.0597	2.14e-06	0.0169	ACAAAAAAAAAAGAG
1026	HMG_tnt.3XHMGBOX1_colamp_a_m1	3XHMGBOX1	Setaria	5995	6009	-	15.7424	2.17e-06	0.0429	TCCTCCACTTCCACC
1027	ABI3VP1_tnt.VRN1_col_a_m1	VRN1	Setaria	5483	5511	+	-0.940299	2.18e-06	0.0144	TCGGCATGTTTTCCTTTTCTTTTTTGAAC
1028	REM_tnt.REM19_col_a_m1	REM19	Setaria	3375	3389	-	15.9851	2.27e-06	0.0169	CCCCAAAAAAAAAAA
1029	C2C2gata_tnt.ZML2_col_a_m1	ZML2	Setaria	5748	5766	-	12.4571	2.38e-06	0.013	CACCTTCACCAGCTTCGTC
1030	AP2EREBP_tnt.ERF5_colamp_a_m1	ERF5	Setaria	5785	5805	-	15.8636	2.47e-06	0.0266	GTTCCGCCGCCAGCAGCGCGT
1031	AP2EREBP_tnt.ERF7_col_a_m1	ERF7	Setaria	5918	5938	+	15.3939	2.73e-06	0.0208	TCGCCCGCGCCGCAGCCGCGT
1032	AP2EREBP_tnt.ERF10_col_a_m1	ERF10	Setaria	2265	2285	-	15.6364	2.76e-06	0.0211	GACGCCTGCAGCGCCGCCTCG
1033	C2H2_tnt.TF3A_col_a_m1	TF3A	Setaria	1963	1981	+	14.936	2.88e-06	0.0295	CCTCCCCCGTCTCCCTCTC
1034	AP2EREBP_tnt.ERF2_col_a_m1	ERF2	Setaria	2264	2284	-	15.4394	3.01e-06	0.0241	ACGCCTGCAGCGCCGCCTCGT
1035	ABI3VP1_tnt.VRN1_colamp_a_m1	VRN1	Setaria	3374	3392	+	14.5278	3.05e-06	0.0265	CTTTTTTTTTTTGGGGGGG
1036	AP2EREBP_tnt.CRF4_col_a_m1	CRF4	Setaria	5785	5805	-	14.9429	3.06e-06	0.0215	GTTCCGCCGCCAGCAGCGCGT
1037	ABI3VP1_tnt.VRN1_colamp_a_m1	VRN1	Setaria	3370	3388	+	14.4722	3.13e-06	0.0265	TACCCTTTTTTTTTTTGGG
1038	REM_tnt.REM19_col_a_m1	REM19	Setaria	3373	3387	-	15.4328	3.33e-06	0.0202	CCAAAAAAAAAAAGG
1039	AP2EREBP_tnt.ERF7_colamp_a_m1	ERF7	Setaria	2266	2286	+	15.5909	3.37e-06	0.0333	GAGGCGGCGCTGCAGGCGTCG
1040	AP2EREBP_tnt.ERF10_col_a_m1	ERF10	Setaria	5914	5934	+	15.3182	3.41e-06	0.0215	GTCCTCGCCCGCGCCGCAGCC
1041	AP2EREBP_tnt.ERF73_colamp_a_m1	ERF73	Setaria	5811	5831	-	14.5395	3.5e-06	0.0266	GGGGCGGCGCTGGCCCTTGCG
1042	AP2EREBP_tnt.ERF104_colamp_a_m1	ERF104	Setaria	5791	5805	+	15.4143	3.59e-06	0.0275	TGCTGGCGGCGGAAC
1043	AP2EREBP_tnt.CRF4_col_a_m1	CRF4	Setaria	5921	5941	+	14.6429	3.64e-06	0.0239	CCCGCGCCGCAGCCGCGTTCA
1044	LOBAS2_tnt.LOB_col_a_m1	LOB	Setaria	2277	2297	-	14.6061	3.73e-06	0.0343	TACACCGTCGTCGACGCCTGC
1045	AP2EREBP_tnt.ERF73_col_a_m1	ERF73	Setaria	5918	5938	+	15.0303	3.79e-06	0.0483	TCGCCCGCGCCGCAGCCGCGT
1046	BBRBPC_tnt.BPC5_col_a_m1	BPC5	Setaria	1570	1599	-	-30.5132	3.89e-06	0.0297	GGCTTGAGGAAAAGTGGAAAGGAGAGAGAG
1047	AP2EREBP_tnt.SHN3_col_a_m1	SHN3	Setaria	5722	5742	-	13.2535	4e-06	0.0252	TCCGACACAGCCTCCATCGCG
1048	BBRBPC_tnt.BPC1_col_a_m1	BPC1	Setaria	1563	1586	-	7.60606	4.21e-06	0.018	GTGGAAAGGAGAGAGAGGGGGCAA
1049	BBRBPC_tnt.BPC5_col_a_m1	BPC5	Setaria	3274	3303	-	-30.9079	4.23e-06	0.0297	GGAAACAAAAAGATAGACTTTGTGACAGAG
1050	C2C2gata_tnt.ZML1_col_a_m1	ZML1	Setaria	3314	3328	-	10.9091	4.49e-06	0.0265	TCATCAACAACATCC
1051	ABI3VP1_tnt.VRN1_col_a_m1	VRN1	Setaria	5480	5508	+	-3.91045	4.5e-06	0.0166	CAGTCGGCATGTTTTCCTTTTCTTTTTTG
1052	REM_tnt.REM19_colamp_a_m1	REM19	Setaria	4513	4533	-	13.8507	4.52e-06	0.0249	AATAGACAAAAAAAAAAGAGG
1053	AP2EREBP_tnt.ERF73_colamp_a_m1	ERF73	Setaria	5913	5933	-	13.8289	5.03e-06	0.0311	GCTGCGGCGCGGGCGAGGACG
1054	ABI3VP1_tnt.VRN1_colamp_a_m1	VRN1	Setaria	4511	4529	+	13.375	5.06e-06	0.0305	AACCTCTTTTTTTTTTGTC
1055	LOBAS2_tnt.LOB_col_a_m1	LOB	Setaria	2253	2273	-	14.0455	5.22e-06	0.0343	GCCGCCTCGTACTCCTCCTGC
1056	AP2EREBP_tnt.ERF48_col_a_m1	ERF48	Setaria	4304	4324	-	13.8857	5.71e-06	0.0289	GGAGGTGGCGCATTCGGTTGA
1057	BBRBPC_tnt.BPC1_col_a_m1	BPC1	Setaria	1565	1588	-	6.74242	5.76e-06	0.0211	AAGTGGAAAGGAGAGAGAGGGGGC
1058	ABI3VP1_tnt.VRN1_col_a_m1	VRN1	Setaria	4845	4873	+	-4.98507	5.79e-06	0.0178	ACTTATTCTCTTGTATGTTTTTTTTCTAA
1059	AP2EREBP_tnt.ERF105_colamp_a_m1	ERF105	Setaria	5794	5817	-	14.3788	5.96e-06	0.028	CCTTGCGCCGGGGTTCCGCCGCCA
1060	AP2EREBP_tnt.ERF2_col_a_m1	ERF2	Setaria	5918	5938	+	14.3182	6.07e-06	0.0334	TCGCCCGCGCCGCAGCCGCGT
1061	ABI3VP1_tnt.VRN1_colamp_a_m1	VRN1	Setaria	3372	3390	+	12.9306	6.1e-06	0.0319	CCCTTTTTTTTTTTGGGGG
1062	AP2EREBP_tnt.ERF48_col_a_m1	ERF48	Setaria	5751	5771	+	13.7429	6.2e-06	0.0289	GAAGCTGGTGAAGGTGGAGCA
1063	BBRBPC_tnt.BPC1_col_a_m1	BPC1	Setaria	1960	1983	-	6.5303	6.21e-06	0.0211	GGGAGAGGGAGACGGGGGAGGGGT
1064	AP2EREBP_tnt.ERF48_col_a_m1	ERF48	Setaria	5748	5768	+	13.7286	6.25e-06	0.0289	GACGAAGCTGGTGAAGGTGGA
1065	ABI3VP1_tnt.VRN1_colamp_a_m1	VRN1	Setaria	3371	3389	+	12.8056	6.42e-06	0.0319	ACCCTTTTTTTTTTTGGGG
1066	AP2EREBP_tnt.ERF7_col_a_m1	ERF7	Setaria	5912	5932	+	14.1212	6.53e-06	0.0372	CCGTCCTCGCCCGCGCCGCAG
1067	AP2EREBP_tnt.ERF73_col_a_m1	ERF73	Setaria	2261	2281	-	14.0455	6.57e-06	0.0483	CCTGCAGCGCCGCCTCGTACT
1068	C2H2_tnt.TF3A_col_a_m1	TF3A	Setaria	5996	6014	-	13.528	6.83e-06	0.0295	CGCCGTCCTCCACTTCCAC
1069	BBRBPC_tnt.BPC5_col_a_m1	BPC5	Setaria	1564	1593	-	-33.6842	6.95e-06	0.0373	AGGAAAAGTGGAAAGGAGAGAGAGGGGGCA
1070	LOBAS2_tnt.LOB_col_a_m1	LOB	Setaria	2265	2285	-	13.5152	7.1e-06	0.0383	GACGCCTGCAGCGCCGCCTCG
1071	AP2EREBP_tnt.ERF5_colamp_a_m1	ERF5	Setaria	2258	2278	-	14.0303	7.24e-06	0.0421	GCAGCGCCGCCTCGTACTCCT
1072	HMG_tnt.3XHMGBOX1_col_a_m1	3XHMGBOX1	Setaria	5916	5936	-	14.0429	7.28e-06	0.0377	GCGGCTGCGGCGCGGGCGAGG
1073	AP2EREBP_tnt.ERF7_colamp_a_m1	ERF7	Setaria	5913	5933	-	14.3939	7.29e-06	0.0481	GCTGCGGCGCGGGCGAGGACG
1074	C2H2_tnt.TF3A_col_a_m1	TF3A	Setaria	5993	6011	-	13.384	7.44e-06	0.0295	CGTCCTCCACTTCCACCAT
1075	AP2EREBP_tnt.ERF5_col_a_m1	ERF5	Setaria	2267	2281	-	13.803	7.69e-06	0.0477	CCTGCAGCGCCGCCT
1076	AP2EREBP_tnt.SHN3_col_a_m1	SHN3	Setaria	2268	2288	-	11.9155	7.72e-06	0.0305	GTCGACGCCTGCAGCGCCGCC
1077	BBRBPC_tnt.BPC1_colamp_a_m1	BPC1	Setaria	1568	1582	+	11.9242	8.01e-06	0.0482	CCCTCTCTCTCCTTT
1078	REM_tnt.REM19_col_a_m1	REM19	Setaria	4516	4530	-	14.0299	8.1e-06	0.0364	AGACAAAAAAAAAAG
1079	BBRBPC_tnt.BPC1_colamp_a_m1	BPC1	Setaria	1564	1578	+	11.8788	8.17e-06	0.0482	TGCCCCCTCTCTCTC
1080	REM_tnt.REM19_colamp_a_m1	REM19	Setaria	5491	5511	-	12.5821	8.48e-06	0.0249	GTTCAAAAAAGAAAAGGAAAA
1081	ABI3VP1_tnt.VRN1_col_a_m1	VRN1	Setaria	4847	4875	+	-6.74627	8.69e-06	0.0235	TTATTCTCTTGTATGTTTTTTTTCTAATA
1082	REM_tnt.REM19_colamp_a_m1	REM19	Setaria	5490	5510	-	12.4328	9.11e-06	0.0252	TTCAAAAAAGAAAAGGAAAAC
1083	AP2EREBP_tnt.SHN3_col_a_m1	SHN3	Setaria	5581	5601	+	11.5634	9.14e-06	0.0305	TCAGCCGGCTTATCAGCCACC
1084	AP2EREBP_tnt.ERF48_col_a_m1	ERF48	Setaria	5783	5803	+	13.0286	9.23e-06	0.0338	CGACGCGCTGCTGGCGGCGGA
1085	AP2EREBP_tnt.SHN3_col_a_m1	SHN3	Setaria	2256	2276	-	11.4789	9.51e-06	0.0305	AGCGCCGCCTCGTACTCCTCC
1086	ABI3VP1_tnt.VRN1_colamp_a_m1	VRN1	Setaria	4516	4534	+	11.8194	9.52e-06	0.0425	CTTTTTTTTTTGTCTATTG
1087	LOBAS2_tnt.LOB_col_a_m1	LOB	Setaria	5581	5601	+	13	9.53e-06	0.04	TCAGCCGGCTTATCAGCCACC
1088	AP2EREBP_tnt.CRF4_col_a_m1	CRF4	Setaria	5715	5735	-	12.8143	9.81e-06	0.0402	CAGCCTCCATCGCGATTGCCG
1089	ABI3VP1_tnt.VRN1_colamp_a_m1	VRN1	Setaria	4513	4531	+	11.7222	9.88e-06	0.0425	CCTCTTTTTTTTTTGTCTA
1090	C2C2gata_tnt.ZML2_col_a_m1	ZML2	Setaria	5102	5120	-	8.95714	9.93e-06	0.0316	CGTCTTCCTCATCAGAGTC
1091	AP2EREBP_tnt.AT4G18450_col_a_m1	AT4G18450	Setaria	2089	2105	-	13.2121	1.02e-05	0.0485	GCGGCGGCCGCACCTGC
1092	AP2EREBP_tnt.ERF2_colamp_a_m1	ERF2	Setaria	5582	5602	+	13.6364	1.03e-05	0.0482	CAGCCGGCTTATCAGCCACCA
1093	AP2EREBP_tnt.ERF73_colamp_a_m1	ERF73	Setaria	5919	5939	-	12.3026	1.05e-05	0.047	AACGCGGCTGCGGCGCGGGCG
1094	HMG_tnt.3XHMGBOX1_col_a_m1	3XHMGBOX1	Setaria	5723	5743	+	13.5857	1.05e-05	0.0491	GCGATGGAGGCTGTGTCGGAG
1095	AP2EREBP_tnt.CRF4_col_a_m1	CRF4	Setaria	1963	1983	+	12.6857	1.05e-05	0.0406	CCTCCCCCGTCTCCCTCTCCC
1096	LOBAS2_tnt.LOB_col_a_m1	LOB	Setaria	5742	5762	-	12.7576	1.09e-05	0.04	TTCACCAGCTTCGTCGGCGCT
1097	ABI3VP1_tnt.VRN1_colamp_a_m1	VRN1	Setaria	3373	3391	+	11.4444	1.1e-05	0.0428	CCTTTTTTTTTTTGGGGGG
1098	mTERF_tnt.AT5G23930_col_a_m1	AT5G23930	Setaria	5583	5602	+	13.0909	1.1e-05	0.0418	AGCCGGCTTATCAGCCACCA
1099	ABI3VP1_tnt.VRN1_col_a_m1	VRN1	Setaria	4843	4871	+	-8.04478	1.16e-05	0.0243	AAACTTATTCTCTTGTATGTTTTTTTTCT
1100	AP2EREBP_tnt.SHN3_col_a_m1	SHN3	Setaria	5751	5771	-	11	1.19e-05	0.0324	TGCTCCACCTTCACCAGCTTC
1101	AP2EREBP_tnt.ERF2_colamp_a_m1	ERF2	Setaria	5915	5935	+	13.3333	1.22e-05	0.0482	TCCTCGCCCGCGCCGCAGCCG
1102	AP2EREBP_tnt.ERF104_col_a_m1	ERF104	Setaria	5792	5810	-	13.0606	1.24e-05	0.0453	CCGGGGTTCCGCCGCCAGC
1103	AP2EREBP_tnt.SHN3_col_a_m1	SHN3	Setaria	5725	5745	-	10.8169	1.3e-05	0.0343	CGCTCCGACACAGCCTCCATC
1104	AP2EREBP_tnt.ERF104_col_a_m1	ERF104	Setaria	5916	5934	+	12.9697	1.3e-05	0.0458	CCTCGCCCGCGCCGCAGCC
1105	REM_tnt.REM19_col_a_m1	REM19	Setaria	3372	3386	-	13.1791	1.32e-05	0.0429	CAAAAAAAAAAAGGG
1106	ABI3VP1_tnt.VRN1_col_a_m1	VRN1	Setaria	2931	2959	+	-8.64179	1.33e-05	0.0253	TTAAATATTTGCTTATTTTGTTTTGCACT
1107	AP2EREBP_tnt.ERF48_col_a_m1	ERF48	Setaria	601	621	+	12.3	1.37e-05	0.0435	GCAAACGGAGTTGGTGGAGAT
1108	BBRBPC_tnt.BPC1_col_a_m1	BPC1	Setaria	1569	1592	-	4.24242	1.38e-05	0.0345	GGAAAAGTGGAAAGGAGAGAGAGG
1109	C2H2_tnt.TF3A_col_a_m1	TF3A	Setaria	3665	3683	+	12.32	1.38e-05	0.0458	CCTCTCCGTTTTCATCCTC
1110	C2C2gata_tnt.ZML2_col_a_m1	ZML2	Setaria	3706	3724	-	8.07143	1.39e-05	0.0343	CAGCATCTTCAGCATCCTC
1111	AP2EREBP_tnt.SHN3_col_a_m1	SHN3	Setaria	5920	5940	+	10.6197	1.42e-05	0.0366	GCCCGCGCCGCAGCCGCGTTC
1112	AP2EREBP_tnt.ERF48_col_a_m1	ERF48	Setaria	2268	2288	+	12.1857	1.45e-05	0.0435	GGCGGCGCTGCAGGCGTCGAC
1113	AP2EREBP_tnt.ESE1_colamp_a_m1	ESE1	Setaria	4305	4324	-	11.6714	1.47e-05	0.0479	GGAGGTGGCGCATTCGGTTG
1114	REM_tnt.REM19_col_a_m1	REM19	Setaria	4513	4527	-	13	1.47e-05	0.0429	CAAAAAAAAAAGAGG
1115	C2H2_tnt.TF3A_col_a_m1	TF3A	Setaria	2254	2272	-	12.144	1.53e-05	0.0458	CCGCCTCGTACTCCTCCTG
1116	mTERF_tnt.AT5G23930_col_a_m1	AT5G23930	Setaria	5724	5743	-	12.4242	1.6e-05	0.0478	CTCCGACACAGCCTCCATCG
1117	AP2EREBP_tnt.SHN3_col_a_m1	SHN3	Setaria	5917	5937	+	10.2676	1.67e-05	0.0409	CTCGCCCGCGCCGCAGCCGCG
1118	AP2EREBP_tnt.ESE1_colamp_a_m1	ESE1	Setaria	2087	2106	-	11.3286	1.7e-05	0.0495	TGCGGCGGCCGCACCTGCTA
1119	AP2EREBP_tnt.ERF105_colamp_a_m1	ERF105	Setaria	5915	5938	+	12.4394	1.73e-05	0.0485	TCCTCGCCCGCGCCGCAGCCGCGT
1120	REM_tnt.REM19_colamp_a_m1	REM19	Setaria	3286	3306	-	10.9254	1.84e-05	0.0339	TATGGAAACAAAAAGATAGAC
1121	REM_tnt.REM19_colamp_a_m1	REM19	Setaria	3370	3390	-	10.9254	1.84e-05	0.0339	CCCCCAAAAAAAAAAAGGGTA
1122	LOBAS2_tnt.LOB_col_a_m1	LOB	Setaria	2268	2288	-	11.803	1.84e-05	0.0469	GTCGACGCCTGCAGCGCCGCC
1123	ABI3VP1_tnt.VRN1_col_a_m1	VRN1	Setaria	5484	5512	+	-10.2537	1.88e-05	0.028	CGGCATGTTTTCCTTTTCTTTTTTGAACG
1124	AP2EREBP_tnt.ERF105_colamp_a_m1	ERF105	Setaria	5122	5145	+	12.2576	1.9e-05	0.0485	CGACTACGACAAGAGGCGCCGTCG
1125	REM_tnt.REM19_colamp_a_m1	REM19	Setaria	2938	2958	-	10.8358	1.91e-05	0.034	GTGCAAAACAAAATAAGCAAA
1126	REM_tnt.REM19_col_a_m1	REM19	Setaria	4855	4869	-	12.4328	2e-05	0.0497	AAAAAAAACATACAA
1127	AP2EREBP_tnt.ERF105_colamp_a_m1	ERF105	Setaria	2270	2293	-	12.1515	2.01e-05	0.0485	CCGTCGTCGACGCCTGCAGCGCCG
1128	REM_tnt.REM19_colamp_a_m1	REM19	Setaria	4855	4875	-	10.7164	2.02e-05	0.0352	TATTAGAAAAAAAACATACAA
1129	ABI3VP1_tnt.VRN1_col_a_m1	VRN1	Setaria	4508	4536	+	-10.5821	2.02e-05	0.0286	TTGAACCTCTTTTTTTTTTGTCTATTGCC
1130	BBRBPC_tnt.BPC1_col_a_m1	BPC1	Setaria	1561	1584	-	2.89394	2.15e-05	0.0464	GGAAAGGAGAGAGAGGGGGCAACT
1131	REM_tnt.REM19_colamp_a_m1	REM19	Setaria	4514	4534	-	10.4925	2.23e-05	0.0368	CAATAGACAAAAAAAAAAGAG
1132	AP2EREBP_tnt.ERF105_colamp_a_m1	ERF105	Setaria	2081	2104	+	11.9394	2.23e-05	0.0489	TCGACCTAGCAGGTGCGGCCGCCG
1133	AP2EREBP_tnt.SHN3_col_a_m1	SHN3	Setaria	2259	2279	-	9.59155	2.27e-05	0.0461	TGCAGCGCCGCCTCGTACTCC
1134	AP2EREBP_tnt.SHN3_col_a_m1	SHN3	Setaria	5748	5768	-	9.5493	2.31e-05	0.0461	TCCACCTTCACCAGCTTCGTC
1135	AP2EREBP_tnt.SHN3_col_a_m1	SHN3	Setaria	4304	4324	+	9.52113	2.34e-05	0.0461	TCAACCGAATGCGCCACCTCC
1136	C2C2gata_tnt.ZML2_col_a_m1	ZML2	Setaria	2364	2382	-	6.45714	2.52e-05	0.0499	CATGATGATCTTCTTGATC
1137	AP2EREBP_tnt.SHN3_col_a_m1	SHN3	Setaria	5783	5803	-	9.23944	2.65e-05	0.0481	TCCGCCGCCAGCAGCGCGTCG
1138	ABI3VP1_tnt.VRN1_col_a_m1	VRN1	Setaria	2943	2971	+	-12.0149	2.73e-05	0.0331	TTATTTTGTTTTGCACTCTGTTTTATGTC
1139	REM_tnt.REM19_colamp_a_m1	REM19	Setaria	5493	5513	-	9.86567	2.93e-05	0.0442	CCGTTCAAAAAAGAAAAGGAA
1140	REM_tnt.REM19_colamp_a_m1	REM19	Setaria	3372	3392	-	9.80597	3.01e-05	0.0442	CCCCCCCAAAAAAAAAAAGGG
1141	REM_tnt.REM19_colamp_a_m1	REM19	Setaria	3371	3391	-	9.58209	3.31e-05	0.0471	CCCCCCAAAAAAAAAAAGGGT
1142	ABI3VP1_tnt.VRN1_col_a_m1	VRN1	Setaria	4681	4709	+	-14.0299	4.13e-05	0.0396	AATTACTCACTATATTCTTATTTTTTAAT
1143	ABI3VP1_tnt.VRN1_col_a_m1	VRN1	Setaria	4504	4532	+	-14.2537	4.32e-05	0.0397	TCACTTGAACCTCTTTTTTTTTTGTCTAT
1144	ABI3VP1_tnt.VRN1_col_a_m1	VRN1	Setaria	2926	2954	+	-15.2388	5.26e-05	0.0416	ACCTTTTAAATATTTGCTTATTTTGTTTT
1145	ABI3VP1_tnt.VRN1_col_a_m1	VRN1	Setaria	3362	3390	+	-15.3284	5.35e-05	0.0416	GATGAAATTACCCTTTTTTTTTTTGGGGG
1146	ABI3VP1_tnt.VRN1_col_a_m1	VRN1	Setaria	3363	3391	+	-15.5224	5.56e-05	0.0416	ATGAAATTACCCTTTTTTTTTTTGGGGGG
1147	ABI3VP1_tnt.VRN1_col_a_m1	VRN1	Setaria	4740	4768	+	-15.7463	5.81e-05	0.0421	TCATAAATTTTCCATTTCTTGTTTTGATG
1148	ABI3VP1_tnt.VRN1_col_a_m1	VRN1	Setaria	729	757	+	-16.6716	6.96e-05	0.0449	GTTGTGTTTGTAAATATTTGTTTTCGTTT
1149	ABI3VP1_tnt.VRN1_col_a_m1	VRN1	Setaria	2929	2957	+	-16.7612	7.08e-05	0.045	TTTTAAATATTTGCTTATTTTGTTTTGCA
1150	ABI3VP1_tnt.VRN1_col_a_m1	VRN1	Setaria	3359	3387	+	-17.1343	7.61e-05	0.0458	TAGGATGAAATTACCCTTTTTTTTTTTGG
1151	ABI3VP1_tnt.VRN1_col_a_m1	VRN1	Setaria	4977	5005	+	-17.3134	7.88e-05	0.0458	TATTAGCAATGCCCTTCCTTTCTTTTTAC
1152	ABI3VP1_tnt.VRN1_col_a_m1	VRN1	Setaria	3361	3389	+	-17.5373	8.22e-05	0.0458	GGATGAAATTACCCTTTTTTTTTTTGGGG
1153	ABI3VP1_tnt.VRN1_col_a_m1	VRN1	Setaria	4739	4767	+	-17.5373	8.22e-05	0.0458	TTCATAAATTTTCCATTTCTTGTTTTGAT
1154	ABI3VP1_tnt.VRN1_col_a_m1	VRN1	Setaria	1132	1160	+	-17.6716	8.44e-05	0.0458	CTATCGGTTTTATTATTGTTATTTTCATT
1155	ABI3VP1_tnt.VRN1_col_a_m1	VRN1	Setaria	3360	3388	+	-18.194	9.32e-05	0.0471	AGGATGAAATTACCCTTTTTTTTTTTGGG
1156	ABI3VP1_tnt.VRN1_col_a_m1	VRN1	Setaria	3285	3313	+	-18.2388	9.4e-05	0.0473	AGTCTATCTTTTTGTTTCCATATTTAGTT
1157	ABI3VP1_tnt.VRN1_col_a_m1	VRN1	Setaria	2994	3022	+	-18.5224	9.91e-05	0.0489	TGTGTGATTTACTTTATTGATTTTTATCG
